# Supplementary material
Source: publisher figshare collection journal article supplement (https://acs.figshare.com/ndownloader/files/9201871)
Supplement: Supplementary file 1 [file 9201871]

 
data_rjc_c
 
_audit_creation_method            'SHELXL-2014/7'
_shelx_SHELXL_version_number      '2014/7'
_chemical_name_systematic         'Cobalt Trispyrazolylmesitylborate chloride'
_chemical_name_common             'TpMes CoCl'
_chemical_melting_point           ?
_chemical_formula_moiety          ?
_chemical_formula_sum
 'C36 H40 B Cl Co N6' 
_chemical_formula_weight          661.93

loop_
 _atom_type_symbol
 _atom_type_description
 _atom_type_scat_dispersion_real
 _atom_type_scat_dispersion_imag
 _atom_type_scat_source
 'C'  'C'   0.0033   0.0016
 'International Tables Vol C Tables 4.2.6.8 and 6.1.1.4'
 'H'  'H'   0.0000   0.0000
 'International Tables Vol C Tables 4.2.6.8 and 6.1.1.4'
 'B'  'B'   0.0013   0.0007
 'International Tables Vol C Tables 4.2.6.8 and 6.1.1.4'
 'N'  'N'   0.0061   0.0033
 'International Tables Vol C Tables 4.2.6.8 and 6.1.1.4'
 'Cl'  'Cl'   0.1484   0.1585
 'International Tables Vol C Tables 4.2.6.8 and 6.1.1.4'
 'Co'  'Co'   0.3494   0.9721
 'International Tables Vol C Tables 4.2.6.8 and 6.1.1.4'
 
_space_group_crystal_system       triclinic
_space_group_IT_number            1
_space_group_name_H-M_alt         'P 1'
_space_group_name_Hall            'P 1'
 
_shelx_space_group_comment
;
The symmetry employed for this shelxl refinement is uniquely defined
by the following loop, which should always be used as a source of
symmetry information in preference to the above space-group names.
They are only intended as comments.
;
 
loop_
 _space_group_symop_operation_xyz
 'x, y, z'
 
_cell_length_a                    9.1600(18)
_cell_length_b                    10.940(2)
_cell_length_c                    17.452(4)
_cell_angle_alpha                 102.47(3)
_cell_angle_beta                  97.46(3)
_cell_angle_gamma                 95.07(3)
_cell_volume                      1680.8(6)
_cell_formula_units_Z             2
_cell_measurement_temperature     293(2)
_cell_measurement_reflns_used     23511
_cell_measurement_theta_min       1.053
_cell_measurement_theta_max       28.692
 
_exptl_crystal_description        'block'
_exptl_crystal_colour             'blue'
_exptl_crystal_density_meas       'not measured'
_exptl_crystal_density_method     'not measured'
_exptl_crystal_density_diffrn     1.308          
_exptl_crystal_F_000              694
_exptl_transmission_factor_min    ?
_exptl_transmission_factor_max    ?
_exptl_crystal_size_max           0.1
_exptl_crystal_size_mid           0.1
_exptl_crystal_size_min           0.05
_exptl_absorpt_coefficient_mu     0.625
_shelx_estimated_absorpt_T_min    ?
_shelx_estimated_absorpt_T_max    ?
_exptl_absorpt_correction_type    multi-scan
_exptl_absorpt_correction_T_min   0.939
_exptl_absorpt_correction_T_max   0.969
_exptl_absorpt_process_details    'SADABS (Sheldrick, 2009)'
_exptl_absorpt_special_details    ?
_diffrn_ambient_temperature       293(2)
_diffrn_radiation_wavelength      0.71073
_diffrn_radiation_type            MoK\a
_diffrn_source                    'fine-focus sealed tube'
_diffrn_measurement_device_type   'Bruker Smart APEX CCD'
_diffrn_measurement_method        '\f and \w scans'
_diffrn_detector_area_resol_mean  8.3
_diffrn_reflns_number             254071
_diffrn_reflns_av_unetI/netI      0.0227
_diffrn_reflns_av_R_equivalents   0.0462
_diffrn_reflns_limit_h_min        -13
_diffrn_reflns_limit_h_max        13
_diffrn_reflns_limit_k_min        -15
_diffrn_reflns_limit_k_max        15
_diffrn_reflns_limit_l_min        -25
_diffrn_reflns_limit_l_max        25
_diffrn_reflns_theta_min          1.920
_diffrn_reflns_theta_max          31.033
_diffrn_reflns_theta_full         25.242
_diffrn_measured_fraction_theta_max   0.999
_diffrn_measured_fraction_theta_full  0.999
_diffrn_reflns_Laue_measured_fraction_max    0.999
_diffrn_reflns_Laue_measured_fraction_full   0.999
_diffrn_reflns_point_group_measured_fraction_max   0.997
_diffrn_reflns_point_group_measured_fraction_full  0.999
_reflns_number_total              21429
_reflns_number_gt                 20432
_reflns_threshold_expression      'I > 2\s(I)'
_reflns_Friedel_coverage          0.997
_reflns_Friedel_fraction_max      0.996
_reflns_Friedel_fraction_full     0.999
 
_reflns_special_details
;
 Reflections were merged by SHELXL according to the crystal
 class for the calculation of statistics and refinement.
 
 _reflns_Friedel_fraction is defined as the number of unique
 Friedel pairs measured divided by the number that would be
 possible theoretically, ignoring centric projections and
 systematic absences.
;
 
_computing_data_collection        ?
_computing_cell_refinement        ?
_computing_data_reduction         ?
_computing_structure_solution     ?
_computing_structure_refinement 'SHELXL-2014/7 (Sheldrick, 2014)'
_computing_molecular_graphics     ?
_computing_publication_material   ?
_refine_special_details           
;
Refinement of F^2^ against ALL reflections.  The weighted R-factor wR and 
 goodness of fit S are based on F^2^, conventional R-factors R are based 
 on F, with F set to zero for negative F^2^. The threshold expression of 
 F^2^ > 2sigma(F^2^) is used only for calculating R-factors(gt) etc. and is 
 not relevant to the choice of reflections for refinement.  R-factors based 
 on F^2^ are statistically about twice as large as those based on F, and R- 
 factors based on ALL data will be even larger.
;
_refine_ls_structure_factor_coef  Fsqd
_refine_ls_matrix_type            full
_refine_ls_weighting_scheme       calc
_refine_ls_weighting_details
'w=1/[\s^2^(Fo^2^)+(0.0399P)^2^+0.3749P] where P=(Fo^2^+2Fc^2^)/3'
_atom_sites_solution_primary      ?
_atom_sites_solution_secondary    ?
_atom_sites_solution_hydrogens    mixed
_refine_ls_hydrogen_treatment     mixed
_refine_ls_extinction_method      none
_refine_ls_extinction_coef        .
_refine_ls_abs_structure_details
;
 Flack x determined using 9696 quotients [(I+)-(I-)]/[(I+)+(I-)]
 (Parsons, Flack and Wagner, Acta Cryst. B69 (2013) 249-259).
;
_refine_ls_abs_structure_Flack    -0.003(2)
_chemical_absolute_configuration  ?
_refine_ls_number_reflns          21429
_refine_ls_number_parameters      835
_refine_ls_number_restraints      5
_refine_ls_R_factor_all           0.0302
_refine_ls_R_factor_gt            0.0280
_refine_ls_wR_factor_ref          0.0721
_refine_ls_wR_factor_gt           0.0709
_refine_ls_goodness_of_fit_ref    1.029
_refine_ls_restrained_S_all       1.030
_refine_ls_shift/su_max           0.016
_refine_ls_shift/su_mean          0.000
 
loop_
 _atom_site_label
 _atom_site_type_symbol
 _atom_site_fract_x
 _atom_site_fract_y
 _atom_site_fract_z
 _atom_site_U_iso_or_equiv
 _atom_site_adp_type
 _atom_site_occupancy
 _atom_site_site_symmetry_order  
 _atom_site_calc_flag
 _atom_site_refinement_flags_posn
 _atom_site_refinement_flags_adp
 _atom_site_refinement_flags_occupancy
 _atom_site_disorder_assembly
 _atom_site_disorder_group
Co2 Co 0.41515(2) 0.12988(2) 0.32177(2) 0.01344(5) Uani 1 1 d . . . . .
Co1 Co 0.53641(2) 0.77458(2) 0.80541(2) 0.01516(6) Uani 1 1 d . . . . .
Cl2 Cl 0.60296(6) 0.16297(6) 0.26131(3) 0.02687(11) Uani 1 1 d . . . . .
Cl1 Cl 0.36012(6) 0.87806(6) 0.84742(4) 0.03121(13) Uani 1 1 d . . . . .
N131 N 0.84092(19) 0.73746(16) 0.80432(10) 0.0167(3) Uani 1 1 d . . . . .
N221 N 0.30082(19) 0.21366(16) 0.46695(10) 0.0156(3) Uani 1 1 d . . . . .
N111 N 0.65694(19) 0.54024(16) 0.76801(10) 0.0169(3) Uani 1 1 d . . . . .
N132 N 0.75582(19) 0.82014(17) 0.84307(10) 0.0169(3) Uani 1 1 d . . . . .
N212 N 0.20158(18) 0.14664(16) 0.28601(10) 0.0158(3) Uani 1 1 d . . . . .
N222 N 0.42215(18) 0.23949(16) 0.43260(10) 0.0156(3) Uani 1 1 d . . . . .
N232 N 0.36232(18) -0.02809(16) 0.35997(10) 0.0154(3) Uani 1 1 d . . . . .
N211 N 0.11324(19) 0.13672(17) 0.34308(11) 0.0169(3) Uani 1 1 d . . . . .
N121 N 0.67819(19) 0.67841(16) 0.67119(10) 0.0154(3) Uani 1 1 d . . . . .
N122 N 0.56069(19) 0.74205(16) 0.68939(10) 0.0165(3) Uani 1 1 d . . . . .
N112 N 0.54335(19) 0.58829(16) 0.80363(10) 0.0165(3) Uani 1 1 d . . . . .
N231 N 0.24901(18) -0.01837(16) 0.40398(10) 0.0163(3) Uani 1 1 d . . . . .
C131 C 0.9852(2) 0.7768(2) 0.83210(13) 0.0196(4) Uani 1 1 d . . . . .
H131 H 1.0647 0.7370 0.8150 0.024 Uiso 1 1 calc R U . . .
C221 C 0.3148(2) 0.29123(19) 0.53947(12) 0.0170(3) Uani 1 1 d . . . . .
H221 H 0.2463 0.2926 0.5745 0.020 Uiso 1 1 calc R U . . .
C211 C -0.0269(2) 0.1492(2) 0.31525(13) 0.0196(4) Uani 1 1 d . . . . .
H211 H -0.1070 0.1463 0.3428 0.023 Uiso 1 1 calc R U . . .
C11A C 0.1737(3) 0.3601(2) 0.74108(14) 0.0260(5) Uani 1 1 d . . . . .
H11A H 0.1958 0.2785 0.7478 0.039 Uiso 1 1 calc R U . . .
H11B H 0.2406 0.3908 0.7096 0.039 Uiso 1 1 calc R U . . .
H11C H 0.0736 0.3535 0.7148 0.039 Uiso 1 1 calc R U . . .
C129 C 0.3586(2) 0.95997(19) 0.62442(12) 0.0191(4) Uani 1 1 d . . . . .
C229 C 0.7888(2) 0.35743(18) 0.50101(12) 0.0170(3) Uani 1 1 d . . . . .
C122 C 0.5757(2) 0.7268(2) 0.56063(12) 0.0193(4) Uani 1 1 d . . . . .
H122 H 0.5566 0.7349 0.5084 0.023 Uiso 1 1 calc R U . . .
C111 C 0.6476(2) 0.41555(19) 0.76456(13) 0.0194(4) Uani 1 1 d . . . . .
H111 H 0.7121 0.3615 0.7429 0.023 Uiso 1 1 calc R U . . .
C215 C 0.2385(2) 0.07879(19) 0.10628(12) 0.0170(3) Uani 1 1 d . . . . .
C222 C 0.4476(2) 0.36832(19) 0.55320(12) 0.0179(4) Uani 1 1 d . . . . .
H222 H 0.4862 0.4305 0.5985 0.022 Uiso 1 1 calc R U . . .
C239 C 0.5081(2) -0.27694(18) 0.24405(12) 0.0185(4) Uani 1 1 d . . . . .
C139 C 0.7575(2) 1.0194(2) 1.01898(12) 0.0202(4) Uani 1 1 d . . . . .
C213 C 0.1127(2) 0.16420(19) 0.22239(12) 0.0165(3) Uani 1 1 d . . . . .
C117 C 0.0735(3) 0.5502(2) 0.93188(14) 0.0219(4) Uani 1 1 d . . . . .
C123 C 0.4968(2) 0.77069(18) 0.62286(12) 0.0165(3) Uani 1 1 d . . . . .
C228 C 0.9201(2) 0.4041(2) 0.47978(13) 0.0227(4) Uani 1 1 d . . . . .
H228 H 1.0100 0.3872 0.5043 0.027 Uiso 1 1 calc R U . . .
C128 C 0.2273(3) 1.0138(2) 0.62959(13) 0.0221(4) Uani 1 1 d . . . . .
H128 H 0.2276 1.0990 0.6300 0.026 Uiso 1 1 calc R U . . .
C138 C 0.6980(2) 1.1229(2) 1.06023(13) 0.0247(4) Uani 1 1 d . . . . .
H138 H 0.6696 1.1206 1.1092 0.030 Uiso 1 1 calc R U . . .
C234 C 0.5309(2) -0.18247(18) 0.31460(12) 0.0156(3) Uani 1 1 d . . . . .
C235 C 0.6754(2) -0.12620(19) 0.34874(12) 0.0179(4) Uani 1 1 d . . . . .
C127 C 0.0952(2) 0.9444(2) 0.63424(13) 0.0218(4) Uani 1 1 d . . . . .
C233 C 0.4038(2) -0.14418(18) 0.35490(12) 0.0157(3) Uani 1 1 d . . . . .
C132 C 0.9953(2) 0.8863(2) 0.89039(13) 0.0217(4) Uani 1 1 d . . . . .
H132 H 1.0814 0.9337 0.9201 0.026 Uiso 1 1 calc R U . . .
C22C C 0.7957(2) 0.2822(2) 0.56392(13) 0.0224(4) Uani 1 1 d . . . . .
H22A H 0.8865 0.2446 0.5662 0.034 Uiso 1 1 calc R U . . .
H22B H 0.7131 0.2171 0.5512 0.034 Uiso 1 1 calc R U . . .
H22C H 0.7919 0.3368 0.6145 0.034 Uiso 1 1 calc R U . . .
C212 C -0.0327(2) 0.1671(2) 0.23964(13) 0.0220(4) Uani 1 1 d . . . . .
H212 H -0.1159 0.1787 0.2065 0.026 Uiso 1 1 calc R U . . .
C134 C 0.7922(2) 1.02018(19) 0.94337(12) 0.0185(4) Uani 1 1 d . . . . .
C13C C 0.7902(3) 0.9116(2) 1.05807(14) 0.0281(5) Uani 1 1 d . . . . .
H13A H 0.8932 0.9226 1.0805 0.042 Uiso 1 1 calc R U . . .
H13B H 0.7674 0.8332 1.0191 0.042 Uiso 1 1 calc R U . . .
H13C H 0.7305 0.9109 1.0994 0.042 Uiso 1 1 calc R U . . .
C133 C 0.8493(2) 0.91099(19) 0.89543(12) 0.0173(3) Uani 1 1 d . . . . .
C224 C 0.6533(2) 0.38271(18) 0.46338(12) 0.0161(3) Uani 1 1 d . . . . .
C225 C 0.6513(2) 0.45459(19) 0.40597(13) 0.0198(4) Uani 1 1 d . . . . .
C238 C 0.6308(3) -0.3133(2) 0.20862(14) 0.0228(4) Uani 1 1 d . . . . .
H238 H 0.6161 -0.3759 0.1619 0.027 Uiso 1 1 calc R U . . .
C115 C 0.1909(2) 0.44984(19) 0.82098(12) 0.0185(4) Uani 1 1 d . . . . .
C216 C 0.2840(2) 0.0902(2) 0.03456(12) 0.0193(4) Uani 1 1 d . . . . .
H216 H 0.3344 0.0280 0.0081 0.023 Uiso 1 1 calc R U . . .
C137 C 0.6803(3) 1.2286(2) 1.03020(14) 0.0260(4) Uani 1 1 d . . . . .
C21C C 0.0613(3) 0.3856(2) 0.15677(15) 0.0258(4) Uani 1 1 d . . . . .
H21A H 0.0806 0.4585 0.1357 0.039 Uiso 1 1 calc R U . . .
H21B H 0.0976 0.4058 0.2127 0.039 Uiso 1 1 calc R U . . .
H21C H -0.0435 0.3596 0.1481 0.039 Uiso 1 1 calc R U . . .
C214 C 0.1673(2) 0.17512(19) 0.14786(12) 0.0160(3) Uani 1 1 d . . . . .
C237 C 0.7738(3) -0.2582(2) 0.24157(14) 0.0234(4) Uani 1 1 d . . . . .
C11B C -0.0648(3) 0.5717(3) 0.96918(16) 0.0308(5) Uani 1 1 d . . . . .
H11D H -0.0851 0.5071 0.9972 0.046 Uiso 1 1 calc R U . . .
H11E H -0.1470 0.5688 0.9284 0.046 Uiso 1 1 calc R U . . .
H11F H -0.0500 0.6527 1.0056 0.046 Uiso 1 1 calc R U . . .
C121 C 0.6882(2) 0.66877(19) 0.59377(12) 0.0169(3) Uani 1 1 d . . . . .
H121 H 0.7591 0.6296 0.5670 0.020 Uiso 1 1 calc R U . . .
C112 C 0.5268(2) 0.3810(2) 0.79838(13) 0.0210(4) Uani 1 1 d . . . . .
H112 H 0.4944 0.3009 0.8041 0.025 Uiso 1 1 calc R U . . .
C124 C 0.3583(2) 0.83219(18) 0.62470(12) 0.0169(3) Uani 1 1 d . . . . .
C223 C 0.5119(2) 0.33288(18) 0.48435(12) 0.0154(3) Uani 1 1 d . . . . .
C116 C 0.0653(2) 0.4695(2) 0.85770(13) 0.0210(4) Uani 1 1 d . . . . .
H116 H -0.0263 0.4273 0.8317 0.025 Uiso 1 1 calc R U . . .
C13B C 0.6204(3) 1.3413(3) 1.07691(18) 0.0367(6) Uani 1 1 d . . . . .
H13D H 0.7014 1.4032 1.1048 0.055 Uiso 1 1 calc R U . . .
H13E H 0.5637 1.3150 1.1143 0.055 Uiso 1 1 calc R U . . .
H13F H 0.5580 1.3772 1.0412 0.055 Uiso 1 1 calc R U . . .
C231 C 0.2193(2) -0.12744(19) 0.42576(12) 0.0182(4) Uani 1 1 d . . . . .
H231 H 0.1469 -0.1444 0.4560 0.022 Uiso 1 1 calc R U . . .
C113 C 0.4632(2) 0.49262(19) 0.82222(12) 0.0178(4) Uani 1 1 d . . . . .
C23C C 0.3549(3) -0.3408(2) 0.20652(14) 0.0255(4) Uani 1 1 d . . . . .
H23A H 0.3146 -0.3866 0.2416 0.038 Uiso 1 1 calc R U . . .
H23B H 0.3606 -0.3981 0.1572 0.038 Uiso 1 1 calc R U . . .
H23C H 0.2919 -0.2784 0.1969 0.038 Uiso 1 1 calc R U . . .
C12C C 0.4975(3) 1.0397(2) 0.61823(18) 0.0305(5) Uani 1 1 d . . . . .
H12A H 0.5064 1.0329 0.5633 0.046 Uiso 1 1 calc R U . . .
H12B H 0.5822 1.0109 0.6442 0.046 Uiso 1 1 calc R U . . .
H12C H 0.4923 1.1262 0.6432 0.046 Uiso 1 1 calc R U . . .
C226 C 0.7860(3) 0.5011(2) 0.38727(15) 0.0272(5) Uani 1 1 d . . . . .
H226 H 0.7853 0.5505 0.3501 0.033 Uiso 1 1 calc R U . . .
C219 C 0.1389(2) 0.27983(19) 0.11558(13) 0.0191(4) Uani 1 1 d . . . . .
C126 C 0.0975(2) 0.8174(2) 0.63413(14) 0.0227(4) Uani 1 1 d . . . . .
H126 H 0.0101 0.7694 0.6369 0.027 Uiso 1 1 calc R U . . .
C236 C 0.7942(2) -0.1654(2) 0.31129(14) 0.0218(4) Uani 1 1 d . . . . .
H236 H 0.8898 -0.1282 0.3337 0.026 Uiso 1 1 calc R U . . .
C232 C 0.3146(2) -0.21011(19) 0.39550(13) 0.0191(4) Uani 1 1 d . . . . .
H232 H 0.3186 -0.2925 0.4010 0.023 Uiso 1 1 calc R U . . .
C12B C -0.0462(3) 1.0036(3) 0.63997(16) 0.0314(5) Uani 1 1 d . . . . .
H12D H -0.0261 1.0837 0.6775 0.047 Uiso 1 1 calc R U . . .
H12E H -0.1168 0.9494 0.6573 0.047 Uiso 1 1 calc R U . . .
H12F H -0.0861 1.0156 0.5888 0.047 Uiso 1 1 calc R U . . .
C218 C 0.1837(3) 0.2863(2) 0.04302(13) 0.0225(4) Uani 1 1 d . . . . .
H218 H 0.1649 0.3553 0.0218 0.027 Uiso 1 1 calc R U . . .
C136 C 0.7191(3) 1.2292(2) 0.95606(15) 0.0281(5) Uani 1 1 d . . . . .
H136 H 0.7085 1.3001 0.9355 0.034 Uiso 1 1 calc R U . . .
C125 C 0.2269(2) 0.7602(2) 0.63001(13) 0.0200(4) Uani 1 1 d . . . . .
C217 C 0.2555(2) 0.1927(2) 0.00159(13) 0.0213(4) Uani 1 1 d . . . . .
C118 C 0.2118(3) 0.6100(2) 0.97020(13) 0.0225(4) Uani 1 1 d . . . . .
H118 H 0.2190 0.6629 1.0204 0.027 Uiso 1 1 calc R U . . .
C227 C 0.9203(3) 0.4755(2) 0.42276(15) 0.0278(5) Uani 1 1 d . . . . .
C22B C 1.0655(3) 0.5216(4) 0.4006(2) 0.0458(8) Uani 1 1 d . . . . .
H22D H 1.0473 0.5714 0.3621 0.069 Uiso 1 1 calc R U . . .
H22E H 1.1137 0.4507 0.3785 0.069 Uiso 1 1 calc R U . . .
H22F H 1.1280 0.5721 0.4472 0.069 Uiso 1 1 calc R U . . .
C23A C 0.7044(2) -0.0259(2) 0.42438(13) 0.0231(4) Uani 1 1 d . . . . .
H23D H 0.8083 -0.0139 0.4451 0.035 Uiso 1 1 calc R U . . .
H23E H 0.6488 -0.0512 0.4625 0.035 Uiso 1 1 calc R U . . .
H23F H 0.6748 0.0517 0.4140 0.035 Uiso 1 1 calc R U . . .
C119 C 0.3401(2) 0.5938(2) 0.93635(12) 0.0203(4) Uani 1 1 d . . . . .
C23B C 0.9054(3) -0.2980(3) 0.20225(17) 0.0353(6) Uani 1 1 d . . . . .
H23G H 0.9956 -0.2597 0.2368 0.053 Uiso 1 1 calc R U . . .
H23H H 0.9020 -0.2714 0.1532 0.053 Uiso 1 1 calc R U . . .
H23I H 0.9022 -0.3881 0.1919 0.053 Uiso 1 1 calc R U . . .
C135 C 0.7739(3) 1.1260(2) 0.91133(14) 0.0243(4) Uani 1 1 d . . . . .
C13A C 0.8128(4) 1.1294(3) 0.83079(17) 0.0391(6) Uani 1 1 d . . . . .
H13G H 0.7915 1.2079 0.8182 0.059 Uiso 1 1 calc R U . . .
H13H H 0.7553 1.0608 0.7917 0.059 Uiso 1 1 calc R U . . .
H13I H 0.9164 1.1218 0.8309 0.059 Uiso 1 1 calc R U . . .
C11C C 0.4861(3) 0.6630(2) 0.98109(14) 0.0285(5) Uani 1 1 d . . . . .
H11G H 0.5082 0.7382 0.9627 0.043 Uiso 1 1 calc R U . . .
H11H H 0.5631 0.6097 0.9723 0.043 Uiso 1 1 calc R U . . .
H11I H 0.4802 0.6851 1.0368 0.043 Uiso 1 1 calc R U . . .
C22A C 0.5077(3) 0.4826(2) 0.36432(15) 0.0276(5) Uani 1 1 d . . . . .
H22G H 0.5246 0.5595 0.3470 0.041 Uiso 1 1 calc R U . . .
H22H H 0.4363 0.4914 0.4002 0.041 Uiso 1 1 calc R U . . .
H22I H 0.4708 0.4146 0.3191 0.041 Uiso 1 1 calc R U . . .
C12A C 0.2231(3) 0.6239(2) 0.63448(18) 0.0300(5) Uani 1 1 d . . . . .
H12G H 0.2625 0.6192 0.6873 0.045 Uiso 1 1 calc R U . . .
H12H H 0.2818 0.5816 0.5976 0.045 Uiso 1 1 calc R U . . .
H12I H 0.1226 0.5840 0.6213 0.045 Uiso 1 1 calc R U . . .
C21B C 0.2998(3) 0.2008(3) -0.07750(15) 0.0300(5) Uani 1 1 d . . . . .
H21D H 0.2230 0.1558 -0.1194 0.045 Uiso 1 1 calc R U . . .
H21E H 0.3904 0.1643 -0.0832 0.045 Uiso 1 1 calc R U . . .
H21F H 0.3143 0.2877 -0.0803 0.045 Uiso 1 1 calc R U . . .
C114 C 0.3296(2) 0.51309(19) 0.86064(12) 0.0172(4) Uani 1 1 d . . . . .
C21A C 0.2651(3) -0.0396(2) 0.13460(13) 0.0224(4) Uani 1 1 d . . . . .
H21G H 0.2608 -0.1088 0.0896 0.034 Uiso 1 1 calc R U . . .
H21H H 0.1903 -0.0577 0.1657 0.034 Uiso 1 1 calc R U . . .
H21I H 0.3611 -0.0274 0.1665 0.034 Uiso 1 1 calc R U . . .
B2 B 0.1777(2) 0.1068(2) 0.42208(13) 0.0159(4) Uani 1 1 d D . . . .
H2 H 0.095(3) 0.098(3) 0.4558(16) 0.024 Uiso 1 1 d D U . . .
B1 B 0.7682(2) 0.6258(2) 0.73604(13) 0.0158(4) Uani 1 1 d D . . . .
H1 H 0.846(3) 0.578(3) 0.7100(16) 0.024 Uiso 1 1 d D U . . .
 
loop_
 _atom_site_aniso_label
 _atom_site_aniso_U_11
 _atom_site_aniso_U_22
 _atom_site_aniso_U_33
 _atom_site_aniso_U_23
 _atom_site_aniso_U_13
 _atom_site_aniso_U_12
Co2 0.00990(11) 0.01632(11) 0.01419(11) 0.00267(9) 0.00338(9) 0.00194(9)
Co1 0.01228(12) 0.01667(12) 0.01562(12) 0.00068(9) 0.00284(9) 0.00336(9)
Cl2 0.0160(2) 0.0422(3) 0.0242(2) 0.0084(2) 0.00973(18) 0.0019(2)
Cl1 0.0211(3) 0.0363(3) 0.0335(3) -0.0033(2) 0.0077(2) 0.0121(2)
N131 0.0137(7) 0.0180(8) 0.0171(8) 0.0003(6) 0.0018(6) 0.0042(6)
N221 0.0130(7) 0.0184(7) 0.0153(7) 0.0027(6) 0.0036(6) 0.0024(6)
N111 0.0154(7) 0.0170(7) 0.0183(8) 0.0022(6) 0.0038(6) 0.0044(6)
N132 0.0135(7) 0.0178(7) 0.0180(8) 0.0004(6) 0.0021(6) 0.0036(6)
N212 0.0127(7) 0.0189(7) 0.0155(7) 0.0027(6) 0.0032(6) 0.0020(6)
N222 0.0112(7) 0.0175(7) 0.0177(7) 0.0027(6) 0.0037(6) 0.0015(6)
N232 0.0127(7) 0.0174(7) 0.0161(7) 0.0028(6) 0.0044(6) 0.0016(6)
N211 0.0122(7) 0.0211(8) 0.0174(8) 0.0035(6) 0.0037(6) 0.0019(6)
N121 0.0137(8) 0.0162(7) 0.0160(8) 0.0012(6) 0.0036(6) 0.0041(6)
N122 0.0144(7) 0.0186(7) 0.0160(7) 0.0014(6) 0.0020(6) 0.0055(6)
N112 0.0148(7) 0.0167(7) 0.0175(7) 0.0016(6) 0.0038(6) 0.0033(6)
N231 0.0125(7) 0.0188(7) 0.0173(7) 0.0031(6) 0.0044(6) 0.0006(6)
C131 0.0119(9) 0.0212(9) 0.0240(10) 0.0013(8) 0.0013(7) 0.0038(7)
C221 0.0160(9) 0.0197(9) 0.0151(8) 0.0015(7) 0.0048(7) 0.0038(7)
C211 0.0124(9) 0.0233(10) 0.0227(10) 0.0037(8) 0.0040(7) 0.0023(7)
C11A 0.0245(11) 0.0269(11) 0.0219(10) -0.0018(8) 0.0020(8) -0.0007(9)
C129 0.0215(9) 0.0190(9) 0.0176(9) 0.0043(7) 0.0049(7) 0.0044(7)
C229 0.0161(8) 0.0151(8) 0.0174(9) 0.0002(7) 0.0010(7) 0.0000(7)
C122 0.0194(9) 0.0215(9) 0.0165(9) 0.0030(7) 0.0038(7) 0.0026(7)
C111 0.0198(9) 0.0179(9) 0.0207(9) 0.0038(7) 0.0033(7) 0.0052(7)
C215 0.0150(8) 0.0184(8) 0.0171(8) 0.0041(7) 0.0008(7) 0.0020(7)
C222 0.0180(9) 0.0171(8) 0.0173(9) 0.0010(7) 0.0028(7) 0.0011(7)
C239 0.0231(10) 0.0151(8) 0.0170(9) 0.0028(7) 0.0017(7) 0.0043(7)
C139 0.0165(9) 0.0227(9) 0.0182(9) 0.0001(7) -0.0004(7) 0.0011(7)
C213 0.0126(8) 0.0182(8) 0.0178(8) 0.0026(7) 0.0012(7) 0.0013(6)
C117 0.0220(10) 0.0233(9) 0.0237(10) 0.0086(8) 0.0075(8) 0.0072(8)
C123 0.0165(9) 0.0155(8) 0.0170(8) 0.0025(7) 0.0016(7) 0.0025(6)
C228 0.0156(9) 0.0250(10) 0.0237(10) 0.0002(8) 0.0016(7) -0.0027(7)
C128 0.0274(11) 0.0192(9) 0.0214(10) 0.0052(7) 0.0057(8) 0.0089(8)
C138 0.0202(10) 0.0298(11) 0.0185(9) -0.0047(8) 0.0008(8) 0.0024(8)
C234 0.0156(8) 0.0147(7) 0.0170(8) 0.0037(6) 0.0036(7) 0.0033(6)
C235 0.0169(9) 0.0183(8) 0.0185(9) 0.0038(7) 0.0032(7) 0.0029(7)
C127 0.0199(9) 0.0272(10) 0.0185(9) 0.0038(8) 0.0023(7) 0.0090(8)
C233 0.0144(8) 0.0162(8) 0.0156(8) 0.0028(7) 0.0011(6) 0.0011(6)
C132 0.0142(9) 0.0230(9) 0.0240(10) -0.0007(8) -0.0009(7) 0.0019(7)
C22C 0.0197(9) 0.0242(10) 0.0224(10) 0.0058(8) -0.0008(8) 0.0026(8)
C212 0.0125(9) 0.0311(11) 0.0223(10) 0.0068(8) 0.0009(7) 0.0037(8)
C134 0.0150(8) 0.0193(9) 0.0184(9) -0.0004(7) 0.0004(7) 0.0015(7)
C13C 0.0377(13) 0.0253(10) 0.0205(10) 0.0049(8) 0.0032(9) 0.0027(9)
C133 0.0157(9) 0.0181(8) 0.0167(9) 0.0019(7) 0.0009(7) 0.0026(7)
C224 0.0152(8) 0.0144(8) 0.0172(8) 0.0009(6) 0.0029(7) 0.0006(6)
C225 0.0215(9) 0.0176(8) 0.0203(9) 0.0058(7) 0.0020(7) 0.0004(7)
C238 0.0314(12) 0.0202(9) 0.0182(9) 0.0027(8) 0.0071(8) 0.0097(8)
C115 0.0201(9) 0.0167(8) 0.0183(9) 0.0035(7) 0.0022(7) 0.0026(7)
C216 0.0186(9) 0.0216(9) 0.0162(9) 0.0015(7) 0.0013(7) 0.0027(7)
C137 0.0207(10) 0.0241(10) 0.0268(11) -0.0065(8) -0.0014(8) 0.0056(8)
C21C 0.0250(11) 0.0216(10) 0.0314(12) 0.0049(8) 0.0051(9) 0.0081(8)
C214 0.0124(8) 0.0186(8) 0.0155(8) 0.0023(7) -0.0004(6) 0.0013(6)
C237 0.0259(11) 0.0251(10) 0.0245(10) 0.0087(8) 0.0118(8) 0.0129(8)
C11B 0.0248(12) 0.0401(13) 0.0311(12) 0.0083(10) 0.0123(9) 0.0106(10)
C121 0.0157(9) 0.0177(8) 0.0154(8) -0.0002(7) 0.0028(7) 0.0013(7)
C112 0.0219(10) 0.0186(9) 0.0240(10) 0.0061(7) 0.0060(8) 0.0030(7)
C124 0.0171(9) 0.0179(8) 0.0152(8) 0.0024(7) 0.0017(7) 0.0043(7)
C223 0.0129(8) 0.0161(8) 0.0167(8) 0.0034(7) 0.0008(6) 0.0027(6)
C116 0.0170(9) 0.0234(9) 0.0237(10) 0.0073(8) 0.0040(7) 0.0029(7)
C13B 0.0323(13) 0.0304(12) 0.0389(14) -0.0109(10) 0.0008(11) 0.0116(10)
C231 0.0145(9) 0.0204(9) 0.0201(9) 0.0057(7) 0.0035(7) -0.0007(7)
C113 0.0175(9) 0.0189(9) 0.0166(8) 0.0040(7) 0.0023(7) 0.0016(7)
C23C 0.0265(11) 0.0243(10) 0.0212(10) -0.0001(8) -0.0018(8) 0.0005(8)
C12C 0.0282(12) 0.0226(10) 0.0449(14) 0.0108(10) 0.0152(10) 0.0036(9)
C226 0.0287(12) 0.0265(11) 0.0269(11) 0.0101(9) 0.0050(9) -0.0046(9)
C219 0.0168(9) 0.0187(9) 0.0211(9) 0.0031(7) 0.0012(7) 0.0037(7)
C126 0.0158(9) 0.0245(10) 0.0259(10) 0.0040(8) -0.0008(8) 0.0024(7)
C236 0.0158(9) 0.0241(10) 0.0271(10) 0.0072(8) 0.0056(8) 0.0047(7)
C232 0.0169(9) 0.0178(8) 0.0230(9) 0.0060(7) 0.0037(7) 0.0007(7)
C12B 0.0253(12) 0.0358(12) 0.0340(13) 0.0054(10) 0.0049(10) 0.0149(10)
C218 0.0231(10) 0.0217(9) 0.0238(10) 0.0088(8) 0.0011(8) 0.0035(8)
C136 0.0317(12) 0.0208(10) 0.0301(11) 0.0027(9) 0.0000(9) 0.0089(9)
C125 0.0173(9) 0.0193(9) 0.0218(9) 0.0036(7) -0.0012(7) 0.0028(7)
C217 0.0206(10) 0.0249(10) 0.0182(9) 0.0063(8) 0.0012(7) 0.0009(8)
C118 0.0258(11) 0.0244(10) 0.0168(9) 0.0021(7) 0.0046(8) 0.0045(8)
C227 0.0232(11) 0.0298(11) 0.0283(11) 0.0046(9) 0.0070(9) -0.0084(9)
C22B 0.0275(14) 0.066(2) 0.0431(16) 0.0184(15) 0.0074(12) -0.0171(13)
C23A 0.0171(9) 0.0264(10) 0.0214(10) -0.0020(8) 0.0015(7) 0.0001(8)
C119 0.0222(10) 0.0221(9) 0.0152(9) 0.0028(7) 0.0018(7) 0.0010(7)
C23B 0.0328(13) 0.0446(15) 0.0358(13) 0.0105(11) 0.0195(11) 0.0212(11)
C135 0.0273(11) 0.0216(9) 0.0233(10) 0.0027(8) 0.0033(8) 0.0056(8)
C13A 0.0601(19) 0.0318(13) 0.0325(13) 0.0144(11) 0.0155(13) 0.0145(12)
C11C 0.0249(11) 0.0359(12) 0.0195(10) -0.0004(9) 0.0009(8) -0.0033(9)
C22A 0.0267(11) 0.0273(11) 0.0320(12) 0.0153(9) -0.0007(9) 0.0062(9)
C12A 0.0194(10) 0.0205(10) 0.0485(15) 0.0094(10) -0.0017(10) 0.0002(8)
C21B 0.0373(14) 0.0337(13) 0.0228(11) 0.0114(10) 0.0086(10) 0.0067(10)
C114 0.0193(9) 0.0170(8) 0.0158(8) 0.0042(7) 0.0030(7) 0.0030(7)
C21A 0.0291(11) 0.0183(9) 0.0214(10) 0.0052(7) 0.0056(8) 0.0066(8)
B2 0.0121(9) 0.0181(9) 0.0172(9) 0.0025(7) 0.0035(7) 0.0021(7)
B1 0.0128(9) 0.0160(9) 0.0179(9) 0.0015(7) 0.0024(7) 0.0032(7)
 
_geom_special_details
;
 All esds (except the esd in the dihedral angle between two l.s. planes)
 are estimated using the full covariance matrix.  The cell esds are taken
 into account individually in the estimation of esds in distances, angles
 and torsion angles; correlations between esds in cell parameters are only
 used when they are defined by crystal symmetry.  An approximate (isotropic)
 treatment of cell esds is used for estimating esds involving l.s. planes.
;
 
loop_
 _geom_bond_atom_site_label_1
 _geom_bond_atom_site_label_2
 _geom_bond_distance
 _geom_bond_site_symmetry_2
 _geom_bond_publ_flag
Co2 N212 2.0115(18) . ?
Co2 N232 2.0246(18) . ?
Co2 N222 2.0335(18) . ?
Co2 Cl2 2.1749(8) . ?
Co1 N132 2.0145(19) . ?
Co1 N122 2.0236(18) . ?
Co1 N112 2.0383(18) . ?
Co1 Cl1 2.1677(9) . ?
N131 C131 1.346(3) . ?
N131 N132 1.371(2) . ?
N131 B1 1.542(3) . ?
N221 C221 1.346(3) . ?
N221 N222 1.366(2) . ?
N221 B2 1.547(3) . ?
N111 C111 1.347(3) . ?
N111 N112 1.367(2) . ?
N111 B1 1.559(3) . ?
N132 C133 1.346(3) . ?
N212 C213 1.348(3) . ?
N212 N211 1.378(2) . ?
N222 C223 1.340(3) . ?
N232 C233 1.346(2) . ?
N232 N231 1.367(2) . ?
N211 C211 1.341(3) . ?
N211 B2 1.541(3) . ?
N121 C121 1.348(3) . ?
N121 N122 1.367(2) . ?
N121 B1 1.554(3) . ?
N122 C123 1.342(3) . ?
N112 C113 1.346(3) . ?
N231 C231 1.345(3) . ?
N231 B2 1.557(3) . ?
C131 C132 1.381(3) . ?
C131 H131 0.9300 . ?
C221 C222 1.380(3) . ?
C221 H221 0.9300 . ?
C211 C212 1.370(3) . ?
C211 H211 0.9300 . ?
C11A C115 1.503(3) . ?
C11A H11A 0.9600 . ?
C11A H11B 0.9600 . ?
C11A H11C 0.9600 . ?
C129 C128 1.390(3) . ?
C129 C124 1.399(3) . ?
C129 C12C 1.508(3) . ?
C229 C228 1.390(3) . ?
C229 C224 1.406(3) . ?
C229 C22C 1.506(3) . ?
C122 C121 1.385(3) . ?
C122 C123 1.404(3) . ?
C122 H122 0.9300 . ?
C111 C112 1.381(3) . ?
C111 H111 0.9300 . ?
C215 C216 1.396(3) . ?
C215 C214 1.405(3) . ?
C215 C21A 1.510(3) . ?
C222 C223 1.402(3) . ?
C222 H222 0.9300 . ?
C239 C238 1.399(3) . ?
C239 C234 1.405(3) . ?
C239 C23C 1.509(3) . ?
C139 C134 1.398(3) . ?
C139 C138 1.399(3) . ?
C139 C13C 1.518(3) . ?
C213 C212 1.405(3) . ?
C213 C214 1.477(3) . ?
C117 C118 1.387(3) . ?
C117 C116 1.390(3) . ?
C117 C11B 1.511(3) . ?
C123 C124 1.489(3) . ?
C228 C227 1.391(3) . ?
C228 H228 0.9300 . ?
C128 C127 1.391(3) . ?
C128 H128 0.9300 . ?
C138 C137 1.382(4) . ?
C138 H138 0.9300 . ?
C234 C235 1.406(3) . ?
C234 C233 1.482(3) . ?
C235 C236 1.393(3) . ?
C235 C23A 1.500(3) . ?
C127 C126 1.391(3) . ?
C127 C12B 1.505(3) . ?
C233 C232 1.399(3) . ?
C132 C133 1.397(3) . ?
C132 H132 0.9300 . ?
C22C H22A 0.9600 . ?
C22C H22B 0.9600 . ?
C22C H22C 0.9600 . ?
C212 H212 0.9300 . ?
C134 C135 1.404(3) . ?
C134 C133 1.481(3) . ?
C13C H13A 0.9600 . ?
C13C H13B 0.9600 . ?
C13C H13C 0.9600 . ?
C224 C225 1.400(3) . ?
C224 C223 1.481(3) . ?
C225 C226 1.397(3) . ?
C225 C22A 1.507(3) . ?
C238 C237 1.388(4) . ?
C238 H238 0.9300 . ?
C115 C116 1.399(3) . ?
C115 C114 1.408(3) . ?
C216 C217 1.395(3) . ?
C216 H216 0.9300 . ?
C137 C136 1.387(4) . ?
C137 C13B 1.513(3) . ?
C21C C219 1.510(3) . ?
C21C H21A 0.9600 . ?
C21C H21B 0.9600 . ?
C21C H21C 0.9600 . ?
C214 C219 1.411(3) . ?
C237 C236 1.386(3) . ?
C237 C23B 1.515(3) . ?
C11B H11D 0.9600 . ?
C11B H11E 0.9600 . ?
C11B H11F 0.9600 . ?
C121 H121 0.9300 . ?
C112 C113 1.404(3) . ?
C112 H112 0.9300 . ?
C124 C125 1.404(3) . ?
C116 H116 0.9300 . ?
C13B H13D 0.9600 . ?
C13B H13E 0.9600 . ?
C13B H13F 0.9600 . ?
C231 C232 1.383(3) . ?
C231 H231 0.9300 . ?
C113 C114 1.481(3) . ?
C23C H23A 0.9600 . ?
C23C H23B 0.9600 . ?
C23C H23C 0.9600 . ?
C12C H12A 0.9600 . ?
C12C H12B 0.9600 . ?
C12C H12C 0.9600 . ?
C226 C227 1.384(4) . ?
C226 H226 0.9300 . ?
C219 C218 1.395(3) . ?
C126 C125 1.391(3) . ?
C126 H126 0.9300 . ?
C236 H236 0.9300 . ?
C232 H232 0.9300 . ?
C12B H12D 0.9600 . ?
C12B H12E 0.9600 . ?
C12B H12F 0.9600 . ?
C218 C217 1.388(3) . ?
C218 H218 0.9300 . ?
C136 C135 1.398(3) . ?
C136 H136 0.9300 . ?
C125 C12A 1.508(3) . ?
C217 C21B 1.507(3) . ?
C118 C119 1.391(3) . ?
C118 H118 0.9300 . ?
C227 C22B 1.507(4) . ?
C22B H22D 0.9600 . ?
C22B H22E 0.9600 . ?
C22B H22F 0.9600 . ?
C23A H23D 0.9600 . ?
C23A H23E 0.9600 . ?
C23A H23F 0.9600 . ?
C119 C114 1.408(3) . ?
C119 C11C 1.505(3) . ?
C23B H23G 0.9600 . ?
C23B H23H 0.9600 . ?
C23B H23I 0.9600 . ?
C135 C13A 1.501(4) . ?
C13A H13G 0.9600 . ?
C13A H13H 0.9600 . ?
C13A H13I 0.9600 . ?
C11C H11G 0.9600 . ?
C11C H11H 0.9600 . ?
C11C H11I 0.9600 . ?
C22A H22G 0.9600 . ?
C22A H22H 0.9600 . ?
C22A H22I 0.9600 . ?
C12A H12G 0.9600 . ?
C12A H12H 0.9600 . ?
C12A H12I 0.9600 . ?
C21B H21D 0.9600 . ?
C21B H21E 0.9600 . ?
C21B H21F 0.9600 . ?
C21A H21G 0.9600 . ?
C21A H21H 0.9600 . ?
C21A H21I 0.9600 . ?
B2 H2 1.02(2) . ?
B1 H1 1.02(2) . ?
 
loop_
 _geom_angle_atom_site_label_1
 _geom_angle_atom_site_label_2
 _geom_angle_atom_site_label_3
 _geom_angle
 _geom_angle_site_symmetry_1
 _geom_angle_site_symmetry_3
 _geom_angle_publ_flag
N212 Co2 N232 92.90(7) . . ?
N212 Co2 N222 94.55(8) . . ?
N232 Co2 N222 91.22(7) . . ?
N212 Co2 Cl2 127.19(5) . . ?
N232 Co2 Cl2 125.30(5) . . ?
N222 Co2 Cl2 116.63(6) . . ?
N132 Co1 N122 93.23(8) . . ?
N132 Co1 N112 93.55(8) . . ?
N122 Co1 N112 90.44(7) . . ?
N132 Co1 Cl1 126.91(6) . . ?
N122 Co1 Cl1 120.32(6) . . ?
N112 Co1 Cl1 123.09(6) . . ?
C131 N131 N132 109.43(17) . . ?
C131 N131 B1 129.89(18) . . ?
N132 N131 B1 120.52(16) . . ?
C221 N221 N222 109.15(17) . . ?
C221 N221 B2 131.06(18) . . ?
N222 N221 B2 119.78(16) . . ?
C111 N111 N112 108.95(17) . . ?
C111 N111 B1 130.03(17) . . ?
N112 N111 B1 120.97(16) . . ?
C133 N132 N131 107.11(17) . . ?
C133 N132 Co1 139.21(14) . . ?
N131 N132 Co1 113.67(13) . . ?
C213 N212 N211 106.91(16) . . ?
C213 N212 Co2 140.39(14) . . ?
N211 N212 Co2 112.69(13) . . ?
C223 N222 N221 107.53(16) . . ?
C223 N222 Co2 139.00(14) . . ?
N221 N222 Co2 113.46(13) . . ?
C233 N232 N231 107.55(16) . . ?
C233 N232 Co2 139.35(14) . . ?
N231 N232 Co2 113.09(12) . . ?
C211 N211 N212 109.33(17) . . ?
C211 N211 B2 129.85(18) . . ?
N212 N211 B2 120.70(16) . . ?
C121 N121 N122 108.97(17) . . ?
C121 N121 B1 131.60(17) . . ?
N122 N121 B1 119.34(16) . . ?
C123 N122 N121 107.75(16) . . ?
C123 N122 Co1 137.80(14) . . ?
N121 N122 Co1 114.36(13) . . ?
C113 N112 N111 107.72(16) . . ?
C113 N112 Co1 139.30(14) . . ?
N111 N112 Co1 112.79(13) . . ?
C231 N231 N232 109.32(17) . . ?
C231 N231 B2 130.48(17) . . ?
N232 N231 B2 120.19(16) . . ?
N131 C131 C132 108.41(19) . . ?
N131 C131 H131 125.8 . . ?
C132 C131 H131 125.8 . . ?
N221 C221 C222 108.68(18) . . ?
N221 C221 H221 125.7 . . ?
C222 C221 H221 125.7 . . ?
N211 C211 C212 108.90(19) . . ?
N211 C211 H211 125.5 . . ?
C212 C211 H211 125.5 . . ?
C115 C11A H11A 109.5 . . ?
C115 C11A H11B 109.5 . . ?
H11A C11A H11B 109.5 . . ?
C115 C11A H11C 109.5 . . ?
H11A C11A H11C 109.5 . . ?
H11B C11A H11C 109.5 . . ?
C128 C129 C124 118.9(2) . . ?
C128 C129 C12C 119.60(19) . . ?
C124 C129 C12C 121.45(19) . . ?
C228 C229 C224 118.88(19) . . ?
C228 C229 C22C 119.24(19) . . ?
C224 C229 C22C 121.88(18) . . ?
C121 C122 C123 105.14(18) . . ?
C121 C122 H122 127.4 . . ?
C123 C122 H122 127.4 . . ?
N111 C111 C112 108.99(19) . . ?
N111 C111 H111 125.5 . . ?
C112 C111 H111 125.5 . . ?
C216 C215 C214 119.26(19) . . ?
C216 C215 C21A 117.83(18) . . ?
C214 C215 C21A 122.89(18) . . ?
C221 C222 C223 105.30(18) . . ?
C221 C222 H222 127.4 . . ?
C223 C222 H222 127.4 . . ?
C238 C239 C234 119.0(2) . . ?
C238 C239 C23C 119.5(2) . . ?
C234 C239 C23C 121.49(19) . . ?
C134 C139 C138 119.0(2) . . ?
C134 C139 C13C 121.1(2) . . ?
C138 C139 C13C 119.9(2) . . ?
N212 C213 C212 108.98(18) . . ?
N212 C213 C214 122.72(18) . . ?
C212 C213 C214 128.28(19) . . ?
C118 C117 C116 118.0(2) . . ?
C118 C117 C11B 121.4(2) . . ?
C116 C117 C11B 120.6(2) . . ?
N122 C123 C122 109.28(18) . . ?
N122 C123 C124 118.82(18) . . ?
C122 C123 C124 131.78(19) . . ?
C229 C228 C227 121.7(2) . . ?
C229 C228 H228 119.2 . . ?
C227 C228 H228 119.2 . . ?
C129 C128 C127 122.1(2) . . ?
C129 C128 H128 119.0 . . ?
C127 C128 H128 119.0 . . ?
C137 C138 C139 121.8(2) . . ?
C137 C138 H138 119.1 . . ?
C139 C138 H138 119.1 . . ?
C239 C234 C235 120.08(19) . . ?
C239 C234 C233 120.36(18) . . ?
C235 C234 C233 119.53(18) . . ?
C236 C235 C234 118.93(19) . . ?
C236 C235 C23A 119.40(19) . . ?
C234 C235 C23A 121.67(18) . . ?
C126 C127 C128 117.9(2) . . ?
C126 C127 C12B 120.4(2) . . ?
C128 C127 C12B 121.7(2) . . ?
N232 C233 C232 108.95(18) . . ?
N232 C233 C234 121.05(17) . . ?
C232 C233 C234 129.93(18) . . ?
C131 C132 C133 105.70(19) . . ?
C131 C132 H132 127.1 . . ?
C133 C132 H132 127.1 . . ?
C229 C22C H22A 109.5 . . ?
C229 C22C H22B 109.5 . . ?
H22A C22C H22B 109.5 . . ?
C229 C22C H22C 109.5 . . ?
H22A C22C H22C 109.5 . . ?
H22B C22C H22C 109.5 . . ?
C211 C212 C213 105.87(19) . . ?
C211 C212 H212 127.1 . . ?
C213 C212 H212 127.1 . . ?
C139 C134 C135 120.2(2) . . ?
C139 C134 C133 121.40(19) . . ?
C135 C134 C133 118.41(19) . . ?
C139 C13C H13A 109.5 . . ?
C139 C13C H13B 109.5 . . ?
H13A C13C H13B 109.5 . . ?
C139 C13C H13C 109.5 . . ?
H13A C13C H13C 109.5 . . ?
H13B C13C H13C 109.5 . . ?
N132 C133 C132 109.34(18) . . ?
N132 C133 C134 120.54(18) . . ?
C132 C133 C134 129.97(19) . . ?
C225 C224 C229 120.29(19) . . ?
C225 C224 C223 119.82(18) . . ?
C229 C224 C223 119.90(18) . . ?
C226 C225 C224 118.9(2) . . ?
C226 C225 C22A 119.6(2) . . ?
C224 C225 C22A 121.5(2) . . ?
C237 C238 C239 121.5(2) . . ?
C237 C238 H238 119.3 . . ?
C239 C238 H238 119.3 . . ?
C116 C115 C114 118.97(19) . . ?
C116 C115 C11A 118.9(2) . . ?
C114 C115 C11A 122.2(2) . . ?
C217 C216 C215 121.6(2) . . ?
C217 C216 H216 119.2 . . ?
C215 C216 H216 119.2 . . ?
C138 C137 C136 118.4(2) . . ?
C138 C137 C13B 121.0(2) . . ?
C136 C137 C13B 120.6(2) . . ?
C219 C21C H21A 109.5 . . ?
C219 C21C H21B 109.5 . . ?
H21A C21C H21B 109.5 . . ?
C219 C21C H21C 109.5 . . ?
H21A C21C H21C 109.5 . . ?
H21B C21C H21C 109.5 . . ?
C215 C214 C219 119.75(18) . . ?
C215 C214 C213 120.83(18) . . ?
C219 C214 C213 119.29(18) . . ?
C236 C237 C238 118.7(2) . . ?
C236 C237 C23B 120.4(2) . . ?
C238 C237 C23B 120.9(2) . . ?
C117 C11B H11D 109.5 . . ?
C117 C11B H11E 109.5 . . ?
H11D C11B H11E 109.5 . . ?
C117 C11B H11F 109.5 . . ?
H11D C11B H11F 109.5 . . ?
H11E C11B H11F 109.5 . . ?
N121 C121 C122 108.84(18) . . ?
N121 C121 H121 125.6 . . ?
C122 C121 H121 125.6 . . ?
C111 C112 C113 105.28(18) . . ?
C111 C112 H112 127.4 . . ?
C113 C112 H112 127.4 . . ?
C129 C124 C125 120.10(19) . . ?
C129 C124 C123 121.38(18) . . ?
C125 C124 C123 118.47(18) . . ?
N222 C223 C222 109.33(17) . . ?
N222 C223 C224 120.15(18) . . ?
C222 C223 C224 130.52(18) . . ?
C117 C116 C115 121.9(2) . . ?
C117 C116 H116 119.1 . . ?
C115 C116 H116 119.1 . . ?
C137 C13B H13D 109.5 . . ?
C137 C13B H13E 109.5 . . ?
H13D C13B H13E 109.5 . . ?
C137 C13B H13F 109.5 . . ?
H13D C13B H13F 109.5 . . ?
H13E C13B H13F 109.5 . . ?
N231 C231 C232 108.41(18) . . ?
N231 C231 H231 125.8 . . ?
C232 C231 H231 125.8 . . ?
N112 C113 C112 109.06(18) . . ?
N112 C113 C114 121.24(18) . . ?
C112 C113 C114 129.69(19) . . ?
C239 C23C H23A 109.5 . . ?
C239 C23C H23B 109.5 . . ?
H23A C23C H23B 109.5 . . ?
C239 C23C H23C 109.5 . . ?
H23A C23C H23C 109.5 . . ?
H23B C23C H23C 109.5 . . ?
C129 C12C H12A 109.5 . . ?
C129 C12C H12B 109.5 . . ?
H12A C12C H12B 109.5 . . ?
C129 C12C H12C 109.5 . . ?
H12A C12C H12C 109.5 . . ?
H12B C12C H12C 109.5 . . ?
C227 C226 C225 121.6(2) . . ?
C227 C226 H226 119.2 . . ?
C225 C226 H226 119.2 . . ?
C218 C219 C214 119.08(19) . . ?
C218 C219 C21C 118.59(19) . . ?
C214 C219 C21C 122.3(2) . . ?
C125 C126 C127 121.8(2) . . ?
C125 C126 H126 119.1 . . ?
C127 C126 H126 119.1 . . ?
C237 C236 C235 121.8(2) . . ?
C237 C236 H236 119.1 . . ?
C235 C236 H236 119.1 . . ?
C231 C232 C233 105.76(18) . . ?
C231 C232 H232 127.1 . . ?
C233 C232 H232 127.1 . . ?
C127 C12B H12D 109.5 . . ?
C127 C12B H12E 109.5 . . ?
H12D C12B H12E 109.5 . . ?
C127 C12B H12F 109.5 . . ?
H12D C12B H12F 109.5 . . ?
H12E C12B H12F 109.5 . . ?
C217 C218 C219 121.9(2) . . ?
C217 C218 H218 119.0 . . ?
C219 C218 H218 119.0 . . ?
C137 C136 C135 121.8(2) . . ?
C137 C136 H136 119.1 . . ?
C135 C136 H136 119.1 . . ?
C126 C125 C124 119.11(19) . . ?
C126 C125 C12A 119.0(2) . . ?
C124 C125 C12A 121.87(19) . . ?
C218 C217 C216 118.3(2) . . ?
C218 C217 C21B 120.8(2) . . ?
C216 C217 C21B 120.9(2) . . ?
C117 C118 C119 122.4(2) . . ?
C117 C118 H118 118.8 . . ?
C119 C118 H118 118.8 . . ?
C226 C227 C228 118.7(2) . . ?
C226 C227 C22B 121.8(2) . . ?
C228 C227 C22B 119.6(2) . . ?
C227 C22B H22D 109.5 . . ?
C227 C22B H22E 109.5 . . ?
H22D C22B H22E 109.5 . . ?
C227 C22B H22F 109.5 . . ?
H22D C22B H22F 109.5 . . ?
H22E C22B H22F 109.5 . . ?
C235 C23A H23D 109.5 . . ?
C235 C23A H23E 109.5 . . ?
H23D C23A H23E 109.5 . . ?
C235 C23A H23F 109.5 . . ?
H23D C23A H23F 109.5 . . ?
H23E C23A H23F 109.5 . . ?
C118 C119 C114 118.9(2) . . ?
C118 C119 C11C 119.4(2) . . ?
C114 C119 C11C 121.7(2) . . ?
C237 C23B H23G 109.5 . . ?
C237 C23B H23H 109.5 . . ?
H23G C23B H23H 109.5 . . ?
C237 C23B H23I 109.5 . . ?
H23G C23B H23I 109.5 . . ?
H23H C23B H23I 109.5 . . ?
C136 C135 C134 118.7(2) . . ?
C136 C135 C13A 120.3(2) . . ?
C134 C135 C13A 121.0(2) . . ?
C135 C13A H13G 109.5 . . ?
C135 C13A H13H 109.5 . . ?
H13G C13A H13H 109.5 . . ?
C135 C13A H13I 109.5 . . ?
H13G C13A H13I 109.5 . . ?
H13H C13A H13I 109.5 . . ?
C119 C11C H11G 109.5 . . ?
C119 C11C H11H 109.5 . . ?
H11G C11C H11H 109.5 . . ?
C119 C11C H11I 109.5 . . ?
H11G C11C H11I 109.5 . . ?
H11H C11C H11I 109.5 . . ?
C225 C22A H22G 109.5 . . ?
C225 C22A H22H 109.5 . . ?
H22G C22A H22H 109.5 . . ?
C225 C22A H22I 109.5 . . ?
H22G C22A H22I 109.5 . . ?
H22H C22A H22I 109.5 . . ?
C125 C12A H12G 109.5 . . ?
C125 C12A H12H 109.5 . . ?
H12G C12A H12H 109.5 . . ?
C125 C12A H12I 109.5 . . ?
H12G C12A H12I 109.5 . . ?
H12H C12A H12I 109.5 . . ?
C217 C21B H21D 109.5 . . ?
C217 C21B H21E 109.5 . . ?
H21D C21B H21E 109.5 . . ?
C217 C21B H21F 109.5 . . ?
H21D C21B H21F 109.5 . . ?
H21E C21B H21F 109.5 . . ?
C115 C114 C119 119.86(19) . . ?
C115 C114 C113 119.30(18) . . ?
C119 C114 C113 120.83(19) . . ?
C215 C21A H21G 109.5 . . ?
C215 C21A H21H 109.5 . . ?
H21G C21A H21H 109.5 . . ?
C215 C21A H21I 109.5 . . ?
H21G C21A H21I 109.5 . . ?
H21H C21A H21I 109.5 . . ?
N211 B2 N221 109.09(17) . . ?
N211 B2 N231 109.00(16) . . ?
N221 B2 N231 108.19(16) . . ?
N211 B2 H2 109.9(16) . . ?
N221 B2 H2 110.4(16) . . ?
N231 B2 H2 110.2(16) . . ?
N131 B1 N121 108.58(16) . . ?
N131 B1 N111 109.15(17) . . ?
N121 B1 N111 107.63(16) . . ?
N131 B1 H1 111.3(17) . . ?
N121 B1 H1 107.2(16) . . ?
N111 B1 H1 112.9(16) . . ?
 
_refine_diff_density_max    0.294
_refine_diff_density_min   -0.312
_refine_diff_density_rms    0.045

_shelx_res_file
;

    rjc_c.res created by SHELXL-2014/7


TITL rjc_a.res in P1
REM Old TITL rjc in P1

REM SHELXT solution in P1
REM R1 0.067,  Rweak 0.035,  Alpha 0.000,  Orientation as input
REM Flack x =  0.009 ( 0.002 ) from Parsons' quotients
REM Formula found by SHELXT:  C74 N12 Cl2 Co2

CELL  0.71073   9.1600  10.9400  17.4516  102.472   97.463   95.069
ZERR    2.000   0.0018   0.0022   0.0035    0.030    0.030    0.030
LATT -1
SFAC C H B N CL CO
UNIT 72 80 2 12 2 2
L.S. 10
BOND $H
LIST 6
FMAP 2
PLAN 20

ACTA

OMIT 0 0 -1
OMIT 0 -3 15
OMIT 0 -9 6
OMIT -3 0 0
OMIT 0 3 -15
OMIT 3 0 0
OMIT -4 0 -4
OMIT 0 9 -6
OMIT 4 0 4
OMIT 2 -5 5

DFIX 0.95 B1 H1 B2 H2

WGHT    0.039900    0.374900
FVAR       0.45457
CO2   6    0.415152    0.129885    0.321774    11.00000    0.00990    0.01632 =
         0.01419    0.00267    0.00338    0.00194
CO1   6    0.536409    0.774581    0.805407    11.00000    0.01228    0.01667 =
         0.01562    0.00068    0.00284    0.00336
CL2   5    0.602962    0.162975    0.261313    11.00000    0.01600    0.04224 =
         0.02423    0.00836    0.00973    0.00193
CL1   5    0.360121    0.878063    0.847423    11.00000    0.02112    0.03633 =
         0.03353   -0.00329    0.00775    0.01212
N131  4    0.840920    0.737457    0.804323    11.00000    0.01367    0.01801 =
         0.01709    0.00031    0.00183    0.00422
N221  4    0.300821    0.213657    0.466953    11.00000    0.01296    0.01835 =
         0.01531    0.00268    0.00356    0.00237
N111  4    0.656942    0.540238    0.768012    11.00000    0.01537    0.01700 =
         0.01828    0.00219    0.00385    0.00443
N132  4    0.755822    0.820136    0.843070    11.00000    0.01353    0.01775 =
         0.01804    0.00044    0.00208    0.00356
N212  4    0.201578    0.146638    0.286012    11.00000    0.01270    0.01890 =
         0.01551    0.00274    0.00323    0.00203
N222  4    0.422148    0.239491    0.432600    11.00000    0.01123    0.01749 =
         0.01770    0.00269    0.00373    0.00146
N232  4    0.362320   -0.028092    0.359974    11.00000    0.01274    0.01742 =
         0.01608    0.00280    0.00437    0.00163
N211  4    0.113242    0.136720    0.343076    11.00000    0.01220    0.02106 =
         0.01738    0.00354    0.00375    0.00187
N121  4    0.678193    0.678408    0.671195    11.00000    0.01365    0.01624 =
         0.01596    0.00122    0.00356    0.00406
N122  4    0.560693    0.742045    0.689393    11.00000    0.01436    0.01860 =
         0.01600    0.00135    0.00200    0.00545
N112  4    0.543348    0.588286    0.803632    11.00000    0.01485    0.01665 =
         0.01749    0.00159    0.00379    0.00326
N231  4    0.249011   -0.018366    0.403980    11.00000    0.01255    0.01878 =
         0.01726    0.00305    0.00435    0.00064
C131  1    0.985236    0.776811    0.832099    11.00000    0.01188    0.02119 =
         0.02400    0.00128    0.00131    0.00380
AFIX  43
H131  2    1.064703    0.737044    0.814961    11.00000   -1.20000
AFIX   0
C221  1    0.314778    0.291230    0.539469    11.00000    0.01596    0.01966 =
         0.01508    0.00150    0.00479    0.00379
AFIX  43
H221  2    0.246271    0.292632    0.574493    11.00000   -1.20000
AFIX   0
C211  1   -0.026871    0.149228    0.315254    11.00000    0.01235    0.02330 =
         0.02271    0.00372    0.00403    0.00233
AFIX  43
H211  2   -0.106980    0.146258    0.342806    11.00000   -1.20000
AFIX   0
C11A  1    0.173654    0.360075    0.741077    11.00000    0.02447    0.02693 =
         0.02194   -0.00180    0.00195   -0.00072
AFIX 137
H11A  2    0.195767    0.278532    0.747803    11.00000   -1.50000
H11B  2    0.240625    0.390832    0.709625    11.00000   -1.50000
H11C  2    0.073557    0.353512    0.714753    11.00000   -1.50000
AFIX   0
C129  1    0.358575    0.959971    0.624421    11.00000    0.02149    0.01901 =
         0.01762    0.00429    0.00490    0.00442
C229  1    0.788850    0.357435    0.501014    11.00000    0.01613    0.01513 =
         0.01736    0.00023    0.00098    0.00002
C122  1    0.575748    0.726765    0.560633    11.00000    0.01944    0.02155 =
         0.01647    0.00305    0.00378    0.00256
AFIX  43
H122  2    0.556584    0.734875    0.508426    11.00000   -1.20000
AFIX   0
C111  1    0.647592    0.415548    0.764559    11.00000    0.01985    0.01792 =
         0.02065    0.00375    0.00330    0.00518
AFIX  43
H111  2    0.712061    0.361456    0.742901    11.00000   -1.20000
AFIX   0
C215  1    0.238467    0.078792    0.106276    11.00000    0.01499    0.01842 =
         0.01712    0.00412    0.00081    0.00199
C222  1    0.447616    0.368318    0.553200    11.00000    0.01796    0.01707 =
         0.01726    0.00104    0.00276    0.00113
AFIX  43
H222  2    0.486203    0.430510    0.598475    11.00000   -1.20000
AFIX   0
C239  1    0.508084   -0.276942    0.244051    11.00000    0.02312    0.01511 =
         0.01696    0.00284    0.00166    0.00432
C139  1    0.757533    1.019448    1.018977    11.00000    0.01650    0.02269 =
         0.01823    0.00012   -0.00044    0.00110
C213  1    0.112679    0.164204    0.222385    11.00000    0.01259    0.01816 =
         0.01778    0.00262    0.00122    0.00127
C117  1    0.073481    0.550234    0.931882    11.00000    0.02201    0.02334 =
         0.02372    0.00857    0.00747    0.00717
C123  1    0.496848    0.770693    0.622860    11.00000    0.01647    0.01548 =
         0.01696    0.00252    0.00159    0.00246
C228  1    0.920075    0.404119    0.479781    11.00000    0.01558    0.02498 =
         0.02366    0.00023    0.00162   -0.00268
AFIX  43
H228  2    1.009969    0.387237    0.504314    11.00000   -1.20000
AFIX   0
C128  1    0.227250    1.013810    0.629592    11.00000    0.02744    0.01921 =
         0.02145    0.00524    0.00568    0.00892
AFIX  43
H128  2    0.227643    1.098971    0.629952    11.00000   -1.20000
AFIX   0
C138  1    0.698017    1.122926    1.060230    11.00000    0.02024    0.02981 =
         0.01853   -0.00474    0.00082    0.00237
AFIX  43
H138  2    0.669606    1.120574    1.109202    11.00000   -1.20000
AFIX   0
C234  1    0.530934   -0.182471    0.314600    11.00000    0.01556    0.01473 =
         0.01696    0.00370    0.00359    0.00328
C235  1    0.675378   -0.126199    0.348738    11.00000    0.01693    0.01831 =
         0.01853    0.00376    0.00321    0.00289
C127  1    0.095244    0.944354    0.634243    11.00000    0.01993    0.02715 =
         0.01846    0.00376    0.00229    0.00899
C233  1    0.403827   -0.144182    0.354900    11.00000    0.01436    0.01622 =
         0.01564    0.00275    0.00113    0.00114
C132  1    0.995304    0.886307    0.890388    11.00000    0.01419    0.02303 =
         0.02398   -0.00069   -0.00087    0.00186
AFIX  43
H132  2    1.081357    0.933746    0.920106    11.00000   -1.20000
AFIX   0
C22C  1    0.795709    0.282185    0.563916    11.00000    0.01967    0.02419 =
         0.02243    0.00581   -0.00078    0.00256
AFIX 137
H22A  2    0.886550    0.244633    0.566172    11.00000   -1.50000
H22B  2    0.713071    0.217136    0.551171    11.00000   -1.50000
H22C  2    0.791878    0.336821    0.614499    11.00000   -1.50000
AFIX   0
C212  1   -0.032745    0.167090    0.239637    11.00000    0.01251    0.03114 =
         0.02227    0.00684    0.00090    0.00371
AFIX  43
H212  2   -0.115912    0.178733    0.206535    11.00000   -1.20000
AFIX   0
C134  1    0.792170    1.020179    0.943375    11.00000    0.01500    0.01931 =
         0.01842   -0.00039    0.00040    0.00152
C13C  1    0.790159    0.911623    1.058073    11.00000    0.03772    0.02534 =
         0.02047    0.00491    0.00323    0.00273
AFIX 137
H13A  2    0.893185    0.922564    1.080457    11.00000   -1.50000
H13B  2    0.767416    0.833169    1.019131    11.00000   -1.50000
H13C  2    0.730515    0.910930    1.099360    11.00000   -1.50000
AFIX   0
C133  1    0.849325    0.910989    0.895428    11.00000    0.01571    0.01813 =
         0.01671    0.00193    0.00088    0.00260
C224  1    0.653287    0.382714    0.463377    11.00000    0.01516    0.01444 =
         0.01722    0.00094    0.00294    0.00064
C225  1    0.651316    0.454594    0.405971    11.00000    0.02153    0.01764 =
         0.02027    0.00576    0.00203    0.00041
C238  1    0.630751   -0.313331    0.208621    11.00000    0.03140    0.02021 =
         0.01821    0.00265    0.00708    0.00971
AFIX  43
H238  2    0.616138   -0.375903    0.161935    11.00000   -1.20000
AFIX   0
C115  1    0.190894    0.449838    0.820984    11.00000    0.02012    0.01673 =
         0.01829    0.00353    0.00218    0.00259
C216  1    0.283957    0.090239    0.034557    11.00000    0.01855    0.02159 =
         0.01623    0.00153    0.00126    0.00273
AFIX  43
H216  2    0.334428    0.028047    0.008122    11.00000   -1.20000
AFIX   0
C137  1    0.680284    1.228562    1.030196    11.00000    0.02074    0.02408 =
         0.02677   -0.00647   -0.00144    0.00560
C21C  1    0.061307    0.385564    0.156769    11.00000    0.02496    0.02161 =
         0.03137    0.00493    0.00509    0.00812
AFIX 137
H21A  2    0.080568    0.458503    0.135708    11.00000   -1.50000
H21B  2    0.097558    0.405839    0.212704    11.00000   -1.50000
H21C  2   -0.043550    0.359591    0.148089    11.00000   -1.50000
AFIX   0
C214  1    0.167344    0.175117    0.147856    11.00000    0.01243    0.01856 =
         0.01551    0.00229   -0.00038    0.00130
C237  1    0.773765   -0.258157    0.241570    11.00000    0.02591    0.02507 =
         0.02450    0.00870    0.01176    0.01290
C11B  1   -0.064768    0.571690    0.969177    11.00000    0.02476    0.04008 =
         0.03110    0.00832    0.01225    0.01064
AFIX 137
H11D  2   -0.085083    0.507149    0.997186    11.00000   -1.50000
H11E  2   -0.147043    0.568824    0.928429    11.00000   -1.50000
H11F  2   -0.050015    0.652732    1.005611    11.00000   -1.50000
AFIX   0
C121  1    0.688229    0.668775    0.593767    11.00000    0.01566    0.01769 =
         0.01543   -0.00023    0.00282    0.00126
AFIX  43
H121  2    0.759097    0.629595    0.566993    11.00000   -1.20000
AFIX   0
C112  1    0.526780    0.380998    0.798381    11.00000    0.02189    0.01858 =
         0.02401    0.00614    0.00602    0.00296
AFIX  43
H112  2    0.494447    0.300932    0.804135    11.00000   -1.20000
AFIX   0
C124  1    0.358320    0.832190    0.624697    11.00000    0.01713    0.01792 =
         0.01519    0.00243    0.00173    0.00429
C223  1    0.511948    0.332876    0.484354    11.00000    0.01292    0.01608 =
         0.01672    0.00335    0.00075    0.00272
C116  1    0.065277    0.469497    0.857702    11.00000    0.01700    0.02338 =
         0.02373    0.00731    0.00402    0.00294
AFIX  43
H116  2   -0.026334    0.427333    0.831729    11.00000   -1.20000
AFIX   0
C13B  1    0.620380    1.341282    1.076914    11.00000    0.03231    0.03041 =
         0.03887   -0.01085    0.00082    0.01162
AFIX 137
H13D  2    0.701414    1.403177    1.104833    11.00000   -1.50000
H13E  2    0.563691    1.315023    1.114342    11.00000   -1.50000
H13F  2    0.558015    1.377185    1.041217    11.00000   -1.50000
AFIX   0
C231  1    0.219275   -0.127440    0.425757    11.00000    0.01446    0.02037 =
         0.02006    0.00571    0.00352   -0.00075
AFIX  43
H231  2    0.146880   -0.144412    0.456027    11.00000   -1.20000
AFIX   0
C113  1    0.463208    0.492616    0.822224    11.00000    0.01752    0.01891 =
         0.01661    0.00397    0.00230    0.00160
C23C  1    0.354885   -0.340807    0.206516    11.00000    0.02650    0.02434 =
         0.02116   -0.00012   -0.00180    0.00046
AFIX 137
H23A  2    0.314649   -0.386612    0.241648    11.00000   -1.50000
H23B  2    0.360604   -0.398073    0.157160    11.00000   -1.50000
H23C  2    0.291933   -0.278367    0.196861    11.00000   -1.50000
AFIX   0
C12C  1    0.497493    1.039730    0.618226    11.00000    0.02818    0.02259 =
         0.04490    0.01079    0.01516    0.00358
AFIX 137
H12A  2    0.506363    1.032889    0.563292    11.00000   -1.50000
H12B  2    0.582248    1.010926    0.644240    11.00000   -1.50000
H12C  2    0.492332    1.126166    0.643200    11.00000   -1.50000
AFIX   0
C226  1    0.785957    0.501115    0.387270    11.00000    0.02870    0.02654 =
         0.02686    0.01007    0.00498   -0.00457
AFIX  43
H226  2    0.785272    0.550527    0.350067    11.00000   -1.20000
AFIX   0
C219  1    0.138898    0.279829    0.115580    11.00000    0.01678    0.01871 =
         0.02113    0.00314    0.00125    0.00368
C126  1    0.097505    0.817352    0.634127    11.00000    0.01582    0.02446 =
         0.02594    0.00404   -0.00081    0.00236
AFIX  43
H126  2    0.010142    0.769368    0.636878    11.00000   -1.20000
AFIX   0
C236  1    0.794202   -0.165357    0.311289    11.00000    0.01578    0.02413 =
         0.02712    0.00715    0.00555    0.00468
AFIX  43
H236  2    0.889828   -0.128194    0.333700    11.00000   -1.20000
AFIX   0
C232  1    0.314624   -0.210106    0.395500    11.00000    0.01691    0.01785 =
         0.02301    0.00601    0.00372    0.00068
AFIX  43
H232  2    0.318612   -0.292476    0.401007    11.00000   -1.20000
AFIX   0
C12B  1   -0.046229    1.003623    0.639972    11.00000    0.02532    0.03581 =
         0.03401    0.00537    0.00490    0.01492
AFIX 137
H12D  2   -0.026118    1.083678    0.677455    11.00000   -1.50000
H12E  2   -0.116769    0.949364    0.657288    11.00000   -1.50000
H12F  2   -0.086063    1.015642    0.588829    11.00000   -1.50000
AFIX   0
C218  1    0.183708    0.286292    0.043023    11.00000    0.02314    0.02170 =
         0.02382    0.00876    0.00109    0.00350
AFIX  43
H218  2    0.164913    0.355329    0.021776    11.00000   -1.20000
AFIX   0
C136  1    0.719139    1.229189    0.956059    11.00000    0.03172    0.02085 =
         0.03008    0.00273   -0.00001    0.00892
AFIX  43
H136  2    0.708475    1.300147    0.935532    11.00000   -1.20000
AFIX   0
C125  1    0.226860    0.760185    0.630009    11.00000    0.01725    0.01931 =
         0.02183    0.00361   -0.00116    0.00275
C217  1    0.255540    0.192693    0.001595    11.00000    0.02056    0.02490 =
         0.01815    0.00626    0.00123    0.00092
C118  1    0.211809    0.610029    0.970202    11.00000    0.02577    0.02438 =
         0.01684    0.00215    0.00456    0.00453
AFIX  43
H118  2    0.218986    0.662924    1.020358    11.00000   -1.20000
AFIX   0
C227  1    0.920331    0.475457    0.422760    11.00000    0.02316    0.02976 =
         0.02831    0.00464    0.00696   -0.00842
C22B  1    1.065514    0.521593    0.400641    11.00000    0.02753    0.06573 =
         0.04310    0.01842    0.00743   -0.01709
AFIX 137
H22D  2    1.047288    0.571400    0.362129    11.00000   -1.50000
H22E  2    1.113743    0.450662    0.378547    11.00000   -1.50000
H22F  2    1.127993    0.572107    0.447159    11.00000   -1.50000
AFIX   0
C23A  1    0.704424   -0.025880    0.424379    11.00000    0.01715    0.02638 =
         0.02139   -0.00200    0.00150    0.00012
AFIX 137
H23D  2    0.808318   -0.013909    0.445084    11.00000   -1.50000
H23E  2    0.648792   -0.051214    0.462491    11.00000   -1.50000
H23F  2    0.674755    0.051700    0.413979    11.00000   -1.50000
AFIX   0
C119  1    0.340116    0.593751    0.936348    11.00000    0.02218    0.02209 =
         0.01521    0.00284    0.00179    0.00098
C23B  1    0.905439   -0.298000    0.202254    11.00000    0.03281    0.04464 =
         0.03584    0.01052    0.01954    0.02117
AFIX 137
H23G  2    0.995592   -0.259708    0.236817    11.00000   -1.50000
H23H  2    0.901984   -0.271444    0.153159    11.00000   -1.50000
H23I  2    0.902195   -0.388101    0.191868    11.00000   -1.50000
AFIX   0
C135  1    0.773914    1.126044    0.911327    11.00000    0.02726    0.02161 =
         0.02331    0.00273    0.00332    0.00556
C13A  1    0.812815    1.129446    0.830788    11.00000    0.06013    0.03183 =
         0.03246    0.01438    0.01545    0.01449
AFIX 137
H13G  2    0.791543    1.207874    0.818249    11.00000   -1.50000
H13H  2    0.755330    1.060788    0.791742    11.00000   -1.50000
H13I  2    0.916445    1.121849    0.830877    11.00000   -1.50000
AFIX   0
C11C  1    0.486125    0.662952    0.981090    11.00000    0.02494    0.03593 =
         0.01953   -0.00040    0.00086   -0.00326
AFIX 137
H11G  2    0.508243    0.738154    0.962743    11.00000   -1.50000
H11H  2    0.563067    0.609723    0.972250    11.00000   -1.50000
H11I  2    0.480180    0.685111    1.036811    11.00000   -1.50000
AFIX   0
C22A  1    0.507697    0.482580    0.364318    11.00000    0.02666    0.02731 =
         0.03196    0.01533   -0.00068    0.00618
AFIX 137
H22G  2    0.524563    0.559497    0.347040    11.00000   -1.50000
H22H  2    0.436300    0.491421    0.400241    11.00000   -1.50000
H22I  2    0.470752    0.414645    0.319142    11.00000   -1.50000
AFIX   0
C12A  1    0.223106    0.623881    0.634475    11.00000    0.01939    0.02049 =
         0.04853    0.00937   -0.00167    0.00019
AFIX 137
H12G  2    0.262526    0.619158    0.687342    11.00000   -1.50000
H12H  2    0.281829    0.581639    0.597639    11.00000   -1.50000
H12I  2    0.122574    0.584048    0.621289    11.00000   -1.50000
AFIX   0
C21B  1    0.299836    0.200849   -0.077502    11.00000    0.03734    0.03375 =
         0.02281    0.01136    0.00863    0.00665
AFIX 137
H21D  2    0.223016    0.155820   -0.119381    11.00000   -1.50000
H21E  2    0.390437    0.164272   -0.083177    11.00000   -1.50000
H21F  2    0.314275    0.287653   -0.080345    11.00000   -1.50000
AFIX   0
C114  1    0.329585    0.513087    0.860642    11.00000    0.01934    0.01703 =
         0.01578    0.00422    0.00301    0.00301
C21A  1    0.265087   -0.039552    0.134595    11.00000    0.02910    0.01828 =
         0.02142    0.00521    0.00558    0.00656
AFIX 137
H21G  2    0.260817   -0.108773    0.089597    11.00000   -1.50000
H21H  2    0.190285   -0.057698    0.165654    11.00000   -1.50000
H21I  2    0.361081   -0.027413    0.166536    11.00000   -1.50000
AFIX   0
B2    3    0.177741    0.106787    0.422084    11.00000    0.01207    0.01813 =
         0.01717    0.00254    0.00353    0.00207
H2    2    0.095418    0.098423    0.455824    11.00000   -1.50000
B1    3    0.768238    0.625789    0.736036    11.00000    0.01284    0.01599 =
         0.01786    0.00147    0.00240    0.00318
H1    2    0.846277    0.577648    0.709953    11.00000   -1.50000

HKLF 4

REM  rjc_a.res in P1
REM R1 =  0.0280 for   20432 Fo > 4sig(Fo)  and  0.0302 for all   21429 data
REM    835 parameters refined using      5 restraints

END

WGHT      0.0399      0.3749

REM Highest difference peak  0.294,  deepest hole -0.312,  1-sigma level  0.045
Q1    1   0.4857  0.3483  0.5224  11.00000  0.05    0.29
Q2    1   0.1053  0.3387  0.1354  11.00000  0.05    0.29
Q3    1   0.3593 -0.1691  0.3836  11.00000  0.05    0.27
Q4    1   0.2705  0.6073  0.9514  11.00000  0.05    0.27
Q5    1   0.2542 -0.1741  0.4011  11.00000  0.05    0.27
Q6    1   0.2929  0.2605  0.5009  11.00000  0.05    0.27
Q7    1   0.9130  0.7740  0.8109  11.00000  0.05    0.27
Q8    1   0.8220  0.9681  0.9197  11.00000  0.05    0.26
Q9    1   0.5966  0.0944  0.2416  11.00000  0.05    0.26
Q10   1   0.2007  0.1233  0.1309  11.00000  0.05    0.26
Q11   1   1.0008  0.8371  0.8556  11.00000  0.05    0.26
Q12   1   0.1999  0.2278  0.0201  11.00000  0.05    0.25
Q13   1  -0.0499  0.1407  0.2747  11.00000  0.05    0.25
Q14   1   0.3796  0.0229  0.3379  11.00000  0.05    0.25
Q15   1   0.1604  0.7882  0.6225  11.00000  0.05    0.25
Q16   1   0.7512  1.1855  0.9397  11.00000  0.05    0.25
Q17   1   0.2464  0.0813  0.0696  11.00000  0.05    0.24
Q18   1   0.0036  0.5610  0.9450  11.00000  0.05    0.24
Q19   1   0.4585  0.0801  0.2958  11.00000  0.05    0.24
Q20   1   0.7369 -0.1480  0.3348  11.00000  0.05    0.24
;
_shelx_res_checksum   34960

_shelx_hkl_file
;
  -1   0   0 1638.54   36.40
  -1   0   0 1622.34   36.30
  -1   0   0 1650.33   36.40
  -1   0   0 1606.34   36.50
  -1   0   0 1653.63   36.60
   1   0   0 1571.14   35.90
   1   0   0 1700.43   35.90
   1   0   0 1590.94   36.00
   1   0   0 1579.54   35.60
   1   0   0 1569.84   35.80
   1   0   0 1585.84   35.60
   1   0   0 1601.44   35.80
   1   0   0 1617.24   36.00
   1   0   0 1608.44   35.70
   1   0   0 1614.44   35.80
   1   0   0 1622.74   36.00
   1   0   0 1600.44   35.70
   1   0   0 1576.74   35.80
   1   0   0 1567.94   35.70
   1   0   0 1572.24   35.90
   1   0   0 1727.53   36.30
   1   0   0 1627.64   35.90
   1   0   0 1576.04   35.60
   1   0   0 1596.94   35.70
   1   0   0 1598.94   35.60
   1   0   0 1578.74   35.60
   1   0   0 1645.84   36.00
   1   0   0 1573.44   35.80
  -2   0   0  233.28    6.30
  -2   0   0  233.18    6.60
  -2   0   0  239.78    6.50
  -2   0   0  231.68    6.50
  -2   0   0  236.18    6.60
  -2   0   0  231.28    6.40
  -2   0   0  232.68    6.80
  -2   0   0  231.68    6.10
   2   0   0  227.78    6.10
   2   0   0  222.68    6.50
   2   0   0  227.38    6.70
   2   0   0  225.48    6.30
   2   0   0  218.68    6.30
   2   0   0  226.38    5.50
   2   0   0  230.18    5.60
   2   0   0  222.58    6.10
   2   0   0  233.68    6.70
   2   0   0  219.78    6.50
   2   0   0  227.48    6.30
   2   0   0  224.78    6.20
   2   0   0  221.48    6.60
   2   0   0  220.68    6.40
   2   0   0  228.48    6.60
   2   0   0  228.58    6.50
   2   0   0  223.38    6.10
   2   0   0  224.98    5.80
   2   0   0  228.88    6.20
   2   0   0  223.48    6.70
   2   0   0  218.58    6.30
  -3   0   0   44.90    2.70
  -3   0   0   53.09    2.70
  -3   0   0   47.10    1.60
  -3   0   0   54.59    2.50
  -3   0   0   53.09    2.70
  -3   0   0   54.19    2.60
  -3   0   0   45.40    2.80
  -3   0   0   48.30    2.20
   3   0   0   56.99    2.00
   3   0   0   53.49    2.70
   3   0   0   54.69    2.90
   3   0   0   49.99    3.00
   3   0   0   53.19    2.70
   3   0   0   53.09    2.80
   3   0   0   45.80    2.40
   3   0   0   49.00    3.00
   3   0   0   46.70    2.80
   3   0   0   58.39    3.00
   3   0   0   56.19    1.90
   3   0   0   58.19    2.70
   3   0   0   53.59    3.10
   3   0   0   50.89    2.60
   3   0   0   46.30    2.20
   3   0   0   55.69    3.10
   3   0   0   50.69    2.90
   3   0   0   58.89    3.00
   3   0   0   52.09    2.60
   3   0   0   55.59    2.60
   3   0   0   59.09    2.90
   3   0   0   51.59    3.00
   3   0   0   59.19    3.20
  -4   0   0   56.19    2.10
  -4   0   0   58.39    3.40
  -4   0   0   56.09    2.70
  -4   0   0   53.59    3.00
  -4   0   0   55.79    2.00
  -4   0   0   59.69    3.30
  -4   0   0   56.39    3.20
  -4   0   0   57.49    3.20
  -4   0   0   54.19    3.50
  -4   0   0   63.79    3.60
  -4   0   0   57.19    3.00
  -4   0   0   53.19    1.90
   4   0   0   51.39    3.10
   4   0   0   51.89    2.90
   4   0   0   54.59    3.50
   4   0   0   59.89    3.50
   4   0   0   52.89    3.00
   4   0   0   54.29    3.20
   4   0   0   57.99    3.50
   4   0   0   53.49    3.30
   4   0   0   53.09    3.60
   4   0   0   58.79    3.40
   4   0   0   56.39    3.50
   4   0   0   55.49    3.00
   4   0   0   51.89    3.10
   4   0   0   57.29    3.00
   4   0   0   57.59    3.70
   4   0   0   52.29    2.90
   4   0   0   57.49    3.40
   4   0   0   53.39    3.40
   4   0   0   56.19    3.60
   4   0   0   51.59    3.00
   4   0   0   55.59    3.50
  -5   0   0  151.48    4.50
  -5   0   0  145.09    4.40
  -5   0   0  148.89    5.70
  -5   0   0  146.59    6.10
  -5   0   0  151.68    6.50
  -5   0   0  140.29    6.50
  -5   0   0  140.09    5.70
  -5   0   0  148.19    5.20
  -5   0   0  144.59    4.50
  -5   0   0  151.18    6.10
  -5   0   0  149.29    6.60
  -5   0   0  139.29    4.50
  -5   0   0  137.99    6.00
   5   0   0  131.89    5.40
   5   0   0  127.29    6.10
   5   0   0  125.19    6.30
   5   0   0  136.69    5.50
   5   0   0  128.99    5.50
   5   0   0  136.79    5.80
   5   0   0  127.49    6.30
   5   0   0  135.09    5.80
   5   0   0  138.69    5.90
   5   0   0  130.79    5.50
   5   0   0  134.09    5.80
   5   0   0  134.19    6.30
   5   0   0  136.39    6.20
   5   0   0  141.39    6.70
   5   0   0  132.79    5.40
   5   0   0  130.89    6.30
   5   0   0  133.19    6.20
   5   0   0  130.19    6.20
   5   0   0  137.19    6.00
   5   0   0  129.99    6.20
   5   0   0  124.29    5.90
  -6   0   0   33.00    4.00
  -6   0   0   37.30    4.00
  -6   0   0   28.30    1.90
  -6   0   0   36.90    3.40
  -6   0   0   35.20    3.60
  -6   0   0   38.10    4.30
  -6   0   0   37.70    4.30
  -6   0   0   30.60    2.00
  -6   0   0   32.10    3.70
  -6   0   0   34.80    3.40
  -6   0   0   38.90    3.70
  -6   0   0   33.80    2.50
   6   0   0   29.30    4.10
   6   0   0   27.10    3.90
   6   0   0   29.50    4.10
   6   0   0   34.70    3.70
   6   0   0   31.40    3.90
   6   0   0   27.60    3.40
   6   0   0   26.10    3.80
   6   0   0   26.30    3.70
   6   0   0   25.50    3.50
   6   0   0   31.80    3.80
   6   0   0   25.70    3.20
   6   0   0   35.80    3.90
   6   0   0   23.90    3.10
   6   0   0   29.90    3.50
   6   0   0   28.70    3.20
   6   0   0   27.00    4.00
   6   0   0   34.00    4.20
   6   0   0   29.90    4.00
   6   0   0   32.20    3.40
   6   0   0   27.30    3.80
   6   0   0   32.70    4.20
  -7   0   0  401.16   12.60
  -7   0   0  391.26   13.20
  -7   0   0  382.66   12.80
  -7   0   0  387.36   14.10
  -7   0   0  396.76   11.60
  -7   0   0  384.66   14.20
  -7   0   0  390.56   12.40
  -7   0   0  408.06   12.20
  -7   0   0  377.06   13.60
  -7   0   0  401.16   13.50
   7   0   0  310.07   12.80
   7   0   0  350.86   11.50
   7   0   0  343.27   13.40
   7   0   0  331.67   12.10
   7   0   0  337.87   11.40
   7   0   0  321.47   12.90
   7   0   0  336.07   12.70
   7   0   0  340.27   12.30
   7   0   0  351.56   12.00
   7   0   0  344.27   13.10
   7   0   0  331.87   12.60
   7   0   0  323.97   12.50
   7   0   0  344.57   11.20
   7   0   0  328.17   11.90
   7   0   0  350.66   12.20
   7   0   0  328.37   12.80
   7   0   0  322.77   12.50
   7   0   0  335.47   11.60
   7   0   0  335.47   11.40
   7   0   0  331.77   13.20
   7   0   0  331.27   11.80
  -8   0   0   64.89    5.80
  -8   0   0   63.89    4.90
  -8   0   0   75.99    6.70
  -8   0   0   61.69    6.40
  -8   0   0   69.29    6.90
  -8   0   0   64.49    4.30
  -8   0   0   78.19    8.30
  -8   0   0   70.99    6.90
   8   0   0   67.69    6.90
   8   0   0   70.89    5.20
   8   0   0   68.09    4.70
   8   0   0   67.79    7.10
   8   0   0   65.39    4.80
   8   0   0   67.79    7.30
   8   0   0   79.49    7.60
   8   0   0   63.49    5.10
   8   0   0   73.99    5.90
   8   0   0   66.59    5.30
   8   0   0   78.79    7.70
   8   0   0   75.79    5.00
   8   0   0   74.69    7.20
   8   0   0   73.09    5.60
   8   0   0   81.59    7.90
   8   0   0   72.09    5.10
   8   0   0   66.59    5.10
   8   0   0   70.79    4.80
   8   0   0   65.39    6.70
  -9   0   0   95.19    6.50
  -9   0   0   91.99    7.10
  -9   0   0   97.29    7.10
  -9   0   0   96.59    6.90
  -9   0   0   95.99    7.40
  -9   0   0  111.79    8.00
  -9   0   0  105.49    6.40
  -9   0   0   90.89    6.20
   9   0   0   99.29    7.70
   9   0   0  108.39    6.80
   9   0   0  101.89    7.90
   9   0   0  106.39    7.60
   9   0   0  111.09    6.80
   9   0   0  112.39    8.10
   9   0   0  109.29    7.80
   9   0   0  123.39    7.90
   9   0   0  108.69    6.90
   9   0   0  113.29    7.70
   9   0   0  103.59    7.80
   9   0   0  116.79    7.90
   9   0   0  109.49    6.50
   9   0   0  104.69    6.30
   9   0   0  109.59    6.60
 -10   0   0    9.90    3.40
 -10   0   0    5.90    3.00
 -10   0   0   12.50    3.50
 -10   0   0    7.60    3.60
 -10   0   0    9.10    3.30
 -10   0   0    8.70    3.00
  10   0   0    8.00    3.00
  10   0   0    3.60    3.00
  10   0   0    5.70    2.50
  10   0   0    6.80    3.10
  10   0   0    6.10    3.10
  10   0   0    6.10    3.10
  10   0   0    8.70    3.30
  10   0   0    2.50    3.30
  10   0   0    3.00    2.30
  10   0   0    6.30    3.30
  10   0   0    4.90    3.00
  10   0   0    5.90    3.20
  10   0   0    5.80    3.30
 -11   0   0   56.29    7.50
 -11   0   0   47.80    7.00
 -11   0   0   63.19    8.60
 -11   0   0   53.89    8.00
 -11   0   0   55.49    7.40
 -11   0   0   55.09    7.00
  11   0   0   54.49    8.00
  11   0   0   42.80    7.20
  11   0   0   58.19    7.60
  11   0   0   52.29    9.50
  11   0   0   40.00    6.80
  11   0   0   68.59    9.10
  11   0   0   53.09    6.60
  11   0   0   52.49    8.00
  11   0   0   41.90    5.90
  11   0   0   50.29    7.30
 -12   0   0   30.10    6.30
 -12   0   0   31.00    6.00
 -12   0   0   27.50    6.30
 -12   0   0   28.30    6.20
 -12   0   0   28.30    5.90
 -12   0   0   36.30    7.00
 -12   0   0   31.90    5.80
  12   0   0   25.80    5.80
  12   0   0   25.50    6.00
  12   0   0   33.20    6.50
  12   0   0   37.90    7.60
  12   0   0   27.50    5.10
  12   0   0   36.70    7.10
  12   0   0   37.30    5.90
  12   0   0   24.30    5.70
 -13   0   0    1.80    3.30
 -13   0   0    2.80    3.10
 -13   0   0    6.90    4.30
  13   0   0    2.70    3.70
  13   0   0    5.50    4.30
  13   0   0    1.80    3.20
  13   0   0    2.80    3.80
  13   0   0    4.50    4.10
  13   0   0    5.50    3.80
  13  -1   0   46.50    7.90
  13  -1   0   52.19    7.40
  13  -1   0   48.20    7.20
  13  -1   0   54.49    8.50
  13  -1   0   41.10    7.40
  13  -1   0   40.40    7.50
  13  -1   0   44.30    8.00
  13  -1   0   48.30    8.50
 -13   1   0   46.20    7.50
 -13   1   0   44.80    8.40
 -13   1   0   45.70    8.10
 -13   1   0   52.09    8.30
  12  -1   0    0.90    3.10
  12  -1   0    1.30    2.40
  12  -1   0    0.40    3.20
  12  -1   0    4.70    3.00
  12  -1   0    4.00    3.40
  12  -1   0    7.30    4.10
  12  -1   0    2.50    3.10
  12  -1   0    0.40    2.30
 -12   1   0    8.00    4.40
 -12   1   0    0.40    2.80
 -12   1   0    6.30    3.70
 -12   1   0    9.10    3.90
  11  -1   0   34.10    6.20
  11  -1   0   28.20    5.80
  11  -1   0   32.20    5.40
  11  -1   0   26.40    5.70
  11  -1   0   28.80    5.00
  11  -1   0   29.10    6.10
  11  -1   0   31.10    4.90
  11  -1   0   39.80    6.90
  11  -1   0   27.00    5.40
 -11   1   0   23.70    4.70
 -11   1   0   25.40    5.60
 -11   1   0   36.00    5.40
 -11   1   0   33.80    5.80
 -11   1   0   30.40    5.50
 -11   1   0   32.30    6.30
 -11   1   0   28.00    5.80
  10  -1   0  106.69    7.00
  10  -1   0  102.89    7.70
  10  -1   0  118.49    8.80
  10  -1   0   98.59    6.90
  10  -1   0  113.09    8.30
  10  -1   0   93.99    7.10
  10  -1   0  114.19   10.70
  10  -1   0  103.99    9.90
  10  -1   0   98.09    7.00
  10  -1   0   91.69    6.60
  10  -1   0  102.49    8.30
  10  -1   0  113.49    8.00
  10  -1   0  116.49    8.80
 -10   1   0  102.79    7.00
 -10   1   0  100.09    9.90
 -10   1   0  109.49    8.70
 -10   1   0  104.89    7.90
 -10   1   0  101.09    7.30
 -10   1   0  104.29    8.30
 -10   1   0  113.19    8.00
   9  -1   0  115.09    6.90
   9  -1   0  117.79    7.70
   9  -1   0  108.29    8.10
   9  -1   0  115.59    7.30
   9  -1   0  119.59    7.20
   9  -1   0  114.39    7.70
   9  -1   0  114.29    6.70
   9  -1   0  120.09    8.20
   9  -1   0  119.79    8.30
   9  -1   0  112.79    7.00
   9  -1   0  114.89    8.10
   9  -1   0  130.39    8.30
   9  -1   0  108.99    6.90
   9  -1   0  114.69    7.90
   9  -1   0  114.89    7.10
   9  -1   0  123.79    7.10
   9  -1   0  105.49    6.70
  -9   1   0  120.49    7.00
  -9   1   0  111.99    7.70
  -9   1   0  115.79    7.60
  -9   1   0  130.89    8.70
  -9   1   0  123.89    7.40
  -9   1   0  120.79    8.20
  -9   1   0  127.29    6.80
   8  -1   0   89.59    6.30
   8  -1   0   83.79    5.60
   8  -1   0   84.99    5.90
   8  -1   0   84.19    6.10
   8  -1   0   81.69    5.50
   8  -1   0   86.79    6.60
   8  -1   0   92.49    6.80
   8  -1   0   89.69    6.50
   8  -1   0   77.09    5.60
   8  -1   0   91.49    5.90
   8  -1   0   87.99    5.60
   8  -1   0   80.19    5.30
   8  -1   0   84.59    5.60
   8  -1   0  101.09    7.10
   8  -1   0   89.39    5.50
   8  -1   0   82.19    5.90
   8  -1   0   82.49    6.40
   8  -1   0   90.19    6.00
   8  -1   0   91.59    6.50
  -8   1   0  100.19    6.10
  -8   1   0   87.39    6.20
  -8   1   0   96.49    6.40
  -8   1   0   93.89    5.50
  -8   1   0  100.99    5.60
  -8   1   0  107.89    7.10
  -8   1   0  101.89    7.10
  -8   1   0   85.39    5.50
   7  -1   0  783.02   23.80
   7  -1   0  798.42   22.40
   7  -1   0  773.82   23.30
   7  -1   0  821.32   22.50
   7  -1   0  771.32   22.40
   7  -1   0  786.82   22.90
   7  -1   0  811.22   22.50
   7  -1   0  827.82   22.40
   7  -1   0  790.72   24.10
   7  -1   0  805.52   22.90
   7  -1   0  817.82   23.50
   7  -1   0  765.02   23.50
   7  -1   0  792.22   23.00
   7  -1   0  817.32   22.70
   7  -1   0  777.62   21.90
   7  -1   0  813.62   22.10
   7  -1   0  766.42   24.00
   7  -1   0  810.32   22.80
   7  -1   0  774.22   23.50
   7  -1   0  809.72   24.40
   7  -1   0  824.12   21.40
  -7   1   0  848.52   23.60
  -7   1   0  837.72   22.60
  -7   1   0  821.92   24.00
  -7   1   0  826.42   23.00
  -7   1   0  853.41   22.10
  -7   1   0  827.32   24.90
  -7   1   0  823.82   22.10
  -7   1   0  800.12   24.40
  -7   1   0  838.42   24.20
  -7   1   0  826.42   22.30
   6  -1   0  950.20   25.30
   6  -1   0  955.80   24.80
   6  -1   0  951.90   26.70
   6  -1   0  969.70   27.00
   6  -1   0  970.30   26.00
   6  -1   0  970.20   25.00
   6  -1   0  952.40   26.30
   6  -1   0  968.90   25.20
   6  -1   0  963.70   25.70
   6  -1   0  950.80   25.30
   6  -1   0  962.80   25.70
   6  -1   0  951.00   25.50
   6  -1   0  979.40   26.30
   6  -1   0  960.70   24.30
   6  -1   0  936.61   25.20
   6  -1   0  951.90   25.70
   6  -1   0  946.91   26.50
   6  -1   0  976.00   26.90
   6  -1   0  943.71   25.10
   6  -1   0  964.90   25.10
   6  -1   0  903.81   26.00
  -6   1   0  926.31   23.80
  -6   1   0  924.71   22.60
  -6   1   0  930.81   25.00
  -6   1   0  953.90   24.70
  -6   1   0  952.90   22.60
  -6   1   0  941.21   25.60
  -6   1   0  951.70   22.50
  -6   1   0  961.20   24.40
  -6   1   0  960.10   24.10
  -6   1   0  929.01   25.50
  -6   1   0  962.20   24.10
  -6   1   0  908.41   26.20
  -6   1   0  899.31   25.90
   5  -1   0 1039.10   26.40
   5  -1   0 1051.79   26.10
   5  -1   0 1067.39   25.70
   5  -1   0 1068.59   26.40
   5  -1   0 1052.79   27.30
   5  -1   0 1038.70   26.10
   5  -1   0 1040.00   26.40
   5  -1   0 1091.89   27.00
   5  -1   0 1063.09   27.10
   5  -1   0 1090.49   27.00
   5  -1   0 1035.60   26.90
   5  -1   0 1055.69   27.50
   5  -1   0 1024.30   26.70
   5  -1   0 1017.60   27.80
   5  -1   0 1024.30   27.60
   5  -1   0 1033.80   26.40
   5  -1   0 1044.50   26.60
   5  -1   0 1030.20   27.30
   5  -1   0 1018.10   27.40
   5  -1   0 1052.79   26.70
   5  -1   0 1022.30   27.70
  -5   1   0 1090.29   25.20
  -5   1   0 1074.59   27.50
  -5   1   0 1068.99   25.00
  -5   1   0 1076.19   28.30
  -5   1   0 1063.89   25.00
  -5   1   0 1057.09   26.70
  -5   1   0 1088.59   27.70
  -5   1   0 1086.69   28.20
  -5   1   0 1074.99   27.10
  -5   1   0 1050.59   26.50
  -5   1   0 1070.99   26.40
   4  -1   0  595.24   16.20
   4  -1   0  570.24   15.90
   4  -1   0  580.64   15.50
   4  -1   0  564.54   15.20
   4  -1   0  559.34   14.80
   4  -1   0  582.74   16.20
   4  -1   0  594.74   14.70
   4  -1   0  546.25   15.20
   4  -1   0  557.54   15.40
   4  -1   0  544.15   15.90
   4  -1   0  564.24   15.20
   4  -1   0  551.14   15.00
   4  -1   0  581.64   13.90
   4  -1   0  569.14   15.20
   4  -1   0  574.84   16.30
   4  -1   0  574.54   15.70
   4  -1   0  570.64   15.50
   4  -1   0  589.44   15.50
   4  -1   0  565.94   15.90
   4  -1   0  573.94   15.60
   4  -1   0  550.44   16.20
   4  -1   0  570.74   15.30
   4  -1   0  570.14   13.80
  -4   1   0  596.84   15.30
  -4   1   0  602.64   14.50
  -4   1   0  588.44   16.10
  -4   1   0  599.84   15.20
  -4   1   0  596.24   14.20
  -4   1   0  583.34   14.20
  -4   1   0  576.44   16.00
  -4   1   0  597.94   14.20
  -4   1   0  575.24   16.50
  -4   1   0  609.44   15.60
  -4   1   0  609.74   15.80
  -4   1   0  584.94   16.60
   3  -1   0  233.58    7.10
   3  -1   0  234.28    7.00
   3  -1   0  234.68    6.70
   3  -1   0  222.58    7.40
   3  -1   0  238.08    6.70
   3  -1   0  228.68    7.50
   3  -1   0  233.68    7.70
   3  -1   0  242.48    7.70
   3  -1   0  235.38    7.30
   3  -1   0  235.88    7.00
   3  -1   0  227.08    6.20
   3  -1   0  220.88    7.60
   3  -1   0  225.88    7.10
   3  -1   0  246.18    7.70
   3  -1   0  227.48    7.20
   3  -1   0  240.88    7.40
   3  -1   0  235.18    7.00
   3  -1   0  238.08    7.20
   3  -1   0  228.18    7.70
   3  -1   0  223.78    7.00
   3  -1   0  235.38    6.90
   3  -1   0  239.38    6.40
  -3   1   0  223.58    6.00
  -3   1   0  221.78    7.40
  -3   1   0  231.98    6.80
  -3   1   0  224.08    6.10
  -3   1   0  219.98    5.90
  -3   1   0  207.58    6.80
  -3   1   0  233.38    7.10
  -3   1   0  220.88    7.30
  -3   1   0  230.18    6.60
  -3   1   0  220.88    5.90
  -3   1   0  224.18    5.70
  -3   1   0  220.88    6.40
  -3   1   0  234.18    6.50
   2  -1   0  208.08    5.80
   2  -1   0  217.18    6.20
   2  -1   0  217.08    6.40
   2  -1   0  219.28    6.00
   2  -1   0  220.18    6.10
   2  -1   0  205.58    5.90
   2  -1   0  211.18    5.90
   2  -1   0  211.78    6.40
   2  -1   0  200.78    6.10
   2  -1   0  202.48    6.20
   2  -1   0  217.48    5.10
   2  -1   0  212.68    5.60
   2  -1   0  223.88    6.30
   2  -1   0  207.88    6.10
   2  -1   0  205.38    5.80
   2  -1   0  201.48    6.40
   2  -1   0  212.38    6.50
   2  -1   0  212.88    5.80
   2  -1   0  217.58    5.90
   2  -1   0  212.38    5.70
   2  -1   0  213.38    5.00
   2  -1   0  212.68    6.20
   2  -1   0  213.08    6.40
   2  -1   0  210.78    6.00
   2  -1   0  206.08    5.60
   2  -1   0  216.38    5.60
   2  -1   0  214.78    6.40
  -2   1   0  205.08    6.10
  -2   1   0  220.98    5.80
  -2   1   0  216.98    5.60
  -2   1   0  211.88    5.60
  -2   1   0  214.38    6.50
  -2   1   0  220.48    6.00
  -2   1   0  208.98    5.60
  -2   1   0  221.88    5.70
  -2   1   0  212.68    5.90
  -2   1   0  219.48    5.60
  -2   1   0  214.88    5.60
  -2   1   0  218.78    6.50
   1  -1   0  132.49    4.00
   1  -1   0  132.09    3.50
   1  -1   0  133.09    3.60
   1  -1   0  129.79    3.40
   1  -1   0  129.59    3.80
   1  -1   0  128.89    3.80
   1  -1   0  129.79    3.40
   1  -1   0  132.39    3.80
   1  -1   0  135.09    4.00
   1  -1   0  128.09    3.30
   1  -1   0  135.39    3.60
   1  -1   0  134.89    3.50
   1  -1   0  135.79    3.90
   1  -1   0  128.39    3.80
   1  -1   0  132.79    3.80
   1  -1   0  135.89    3.80
   1  -1   0  134.89    3.80
   1  -1   0  132.89    3.80
   1  -1   0  131.99    3.50
   1  -1   0  130.79    3.80
   1  -1   0  131.79    3.80
   1  -1   0  129.89    3.60
   1  -1   0  121.09    3.70
   1  -1   0  132.99    3.50
   1  -1   0  133.39    3.80
   1  -1   0  129.29    3.70
   1  -1   0  136.09    3.80
   1  -1   0  132.59    3.50
  -1   1   0  133.49    4.00
  -1   1   0  131.19    3.30
  -1   1   0  132.79    3.90
  -1   1   0  134.59    3.40
  -1   1   0  133.69    3.70
  -1   1   0  129.39    3.70
  -1   1   0  132.89    3.90
  -1   1   0  134.49    3.70
  -1   1   0  129.49    4.00
  -1   1   0  133.69    3.30
  -1   1   0  132.39    3.80
   0  -1   0  374.56    9.00
   0  -1   0  382.06    9.20
   0  -1   0  374.26    9.20
   0  -1   0  393.56    9.00
   0  -1   0  389.86    9.10
   0  -1   0  361.86    9.00
   0  -1   0  392.36    9.10
   0  -1   0  387.96    9.00
   0  -1   0  396.96    9.20
   0  -1   0  387.66    9.20
   0  -1   0  388.66    9.20
   0  -1   0  400.56    9.20
   0  -1   0  391.36    9.10
   0   1   0  380.06    8.90
   0   1   0  390.26    8.90
   0   1   0  321.97    8.60
   0   1   0  328.27    8.90
   0   1   0  374.96    8.80
   0   1   0  382.56    8.70
   0   1   0  342.37    8.60
   0   1   0  389.36    8.50
   0   1   0  372.16    8.80
   0   1   0  390.66    8.80
   0   1   0  396.46    8.80
   0   1   0  399.46    8.90
   0   1   0  382.66    8.50
   0   1   0  378.06    9.00
   0   1   0  395.66    8.90
  -1  -1   0 1323.07   29.10
  -1  -1   0 1319.57   28.80
  -1  -1   0 1256.97   28.70
  -1  -1   0 1252.77   29.40
  -1  -1   0 1296.07   28.90
  -1  -1   0 1282.97   29.20
  -1  -1   0 1284.77   29.40
  -1  -1   0 1277.97   28.90
  -1  -1   0 1276.37   28.40
  -1  -1   0 1343.17   29.00
  -1  -1   0 1276.57   28.90
  -1  -1   0 1290.07   28.40
  -1  -1   0 1275.37   29.30
  -1  -1   0 1272.27   29.30
  -1  -1   0 1281.97   28.90
   1   1   0 1238.18   27.40
   1   1   0 1183.28   27.50
   1   1   0 1235.68   27.30
   1   1   0 1182.98   26.90
   1   1   0 1237.18   27.20
   1   1   0 1244.08   27.50
   1   1   0 1201.88   27.60
   1   1   0 1205.58   26.90
   1   1   0 1190.98   27.10
   1   1   0 1184.68   27.50
   1   1   0 1203.28   27.70
   1   1   0 1202.68   26.90
   1   1   0 1188.18   27.40
   1   1   0 1214.88   27.70
   1   1   0 1205.48   27.40
   1   1   0 1228.38   27.20
   1   1   0 1187.58   27.60
   1   1   0 1216.48   27.60
   1   1   0 1211.38   26.70
   1   1   0 1228.28   27.70
   1   1   0 1210.88   27.00
   1   1   0 1200.28   26.90
   1   1   0 1188.68   27.50
   1   1   0 1194.48   26.80
   1   1   0 1228.28   27.50
  -2  -1   0 2142.59   47.90
  -2  -1   0 2280.17   48.00
  -2  -1   0 2123.19   48.00
  -2  -1   0 2066.19   49.40
  -2  -1   0 2120.09   48.80
  -2  -1   0 2160.78   48.90
  -2  -1   0 2159.68   48.20
  -2  -1   0 2218.18   48.10
  -2  -1   0 2146.69   49.20
  -2  -1   0 2183.48   48.40
  -2  -1   0 2199.98   48.30
  -2  -1   0 2134.09   48.20
  -2  -1   0 2154.58   48.90
  -2  -1   0 2147.79   48.00
  -2  -1   0 2159.18   49.30
   2   1   0 1979.20   45.00
   2   1   0 2026.30   45.30
   2   1   0 1969.80   45.20
   2   1   0 1997.00   45.40
   2   1   0 1918.41   44.20
   2   1   0 1961.30   44.40
   2   1   0 2030.50   45.70
   2   1   0 1981.10   45.30
   2   1   0 1991.60   43.80
   2   1   0 1981.80   43.80
   2   1   0 1930.11   45.40
   2   1   0 1973.00   44.40
   2   1   0 1965.90   45.10
   2   1   0 1993.20   45.50
   2   1   0 2007.40   44.50
   2   1   0 1917.21   44.30
   2   1   0 1971.90   44.70
   2   1   0 1999.20   45.40
   2   1   0 1999.90   45.50
   2   1   0 2014.40   45.50
   2   1   0 2035.00   44.40
   2   1   0 2019.90   45.10
   2   1   0 1934.71   45.40
   2   1   0 2061.09   45.20
   2   1   0 2028.20   45.50
   2   1   0 1958.10   44.60
  -3  -1   0  185.48    5.40
  -3  -1   0  185.88    5.10
  -3  -1   0  186.98    6.10
  -3  -1   0  182.28    5.50
  -3  -1   0  179.98    6.50
  -3  -1   0  177.48    6.30
  -3  -1   0  187.38    6.00
  -3  -1   0  193.08    6.40
  -3  -1   0  188.18    5.20
  -3  -1   0  180.38    6.50
  -3  -1   0  183.78    5.10
  -3  -1   0  188.38    5.30
  -3  -1   0  182.48    6.10
  -3  -1   0  185.68    6.80
  -3  -1   0  192.08    5.10
  -3  -1   0  188.68    5.50
  -3  -1   0  183.48    5.50
   3   1   0  180.38    6.00
   3   1   0  181.78    5.80
   3   1   0  182.88    5.00
   3   1   0  167.28    6.20
   3   1   0  183.58    6.40
   3   1   0  189.98    6.40
   3   1   0  172.38    6.40
   3   1   0  182.88    6.20
   3   1   0  170.78    5.50
   3   1   0  174.58    6.40
   3   1   0  177.68    5.80
   3   1   0  179.98    5.50
   3   1   0  179.88    5.40
   3   1   0  176.18    5.60
   3   1   0  176.68    5.40
   3   1   0  175.68    6.30
   3   1   0  182.98    6.40
   3   1   0  170.28    6.40
   3   1   0  174.28    6.30
   3   1   0  180.08    6.50
   3   1   0  180.08    6.00
   3   1   0  175.08    4.90
   3   1   0  179.58    6.40
   3   1   0  177.98    6.10
  -4  -1   0  682.23   16.50
  -4  -1   0  670.43   17.80
  -4  -1   0  694.93   16.90
  -4  -1   0  677.23   16.40
  -4  -1   0  704.73   16.40
  -4  -1   0  682.83   16.80
  -4  -1   0  694.13   19.00
  -4  -1   0  663.53   16.30
  -4  -1   0  691.03   17.80
  -4  -1   0  668.23   16.20
  -4  -1   0  681.63   17.00
  -4  -1   0  680.13   18.30
  -4  -1   0  676.13   17.50
  -4  -1   0  713.83   18.70
  -4  -1   0  683.03   18.30
  -4  -1   0  662.43   18.40
   4   1   0  690.73   17.60
   4   1   0  695.33   18.20
   4   1   0  685.93   19.00
   4   1   0  707.63   19.00
   4   1   0  711.73   17.70
   4   1   0  683.23   19.20
   4   1   0  686.83   18.80
   4   1   0  704.13   18.10
   4   1   0  699.53   19.10
   4   1   0  723.43   18.40
   4   1   0  690.23   18.70
   4   1   0  703.73   16.60
   4   1   0  704.73   19.30
   4   1   0  689.63   17.90
   4   1   0  702.73   19.20
   4   1   0  713.33   19.10
   4   1   0  685.83   19.00
   4   1   0  721.23   16.80
   4   1   0  706.93   17.90
   4   1   0  695.23   18.90
   4   1   0  704.93   17.70
   4   1   0  712.03   17.90
   4   1   0  706.63   18.80
   4   1   0  705.93   19.20
  -5  -1   0   14.10    1.80
  -5  -1   0   13.70    2.30
  -5  -1   0   12.70    1.50
  -5  -1   0   14.30    2.50
  -5  -1   0   13.50    2.20
  -5  -1   0   11.60    2.20
  -5  -1   0   11.30    1.70
  -5  -1   0   12.60    2.30
  -5  -1   0   17.40    1.70
  -5  -1   0   13.90    1.60
  -5  -1   0   15.80    1.60
  -5  -1   0   11.40    2.10
  -5  -1   0   13.60    2.70
  -5  -1   0   14.50    2.10
  -5  -1   0   16.30    1.90
   5   1   0   10.30    1.80
   5   1   0   10.60    2.00
   5   1   0   11.40    2.40
   5   1   0    8.20    2.20
   5   1   0   10.70    2.30
   5   1   0    8.20    2.20
   5   1   0   11.70    2.20
   5   1   0   10.10    2.00
   5   1   0    7.30    2.10
   5   1   0   10.70    1.90
   5   1   0   10.10    2.20
   5   1   0    8.70    2.00
   5   1   0    8.80    1.30
   5   1   0   10.10    1.20
   5   1   0   10.50    2.20
   5   1   0   11.80    2.60
   5   1   0    9.20    1.70
   5   1   0   11.10    2.50
   5   1   0    8.00    2.00
   5   1   0   11.10    1.80
   5   1   0   10.90    1.80
   5   1   0   13.10    2.40
   5   1   0   10.80    2.00
   5   1   0   12.00    2.00
  -6  -1   0  180.28    8.40
  -6  -1   0  177.48    7.10
  -6  -1   0  171.38    6.50
  -6  -1   0  167.08    6.20
  -6  -1   0  168.48    5.60
  -6  -1   0  163.68    5.30
  -6  -1   0  171.38    5.60
  -6  -1   0  178.08    8.20
  -6  -1   0  170.68    6.20
  -6  -1   0  170.38    7.10
  -6  -1   0  166.98    5.50
  -6  -1   0  174.88    7.60
  -6  -1   0  176.18    6.40
  -6  -1   0  187.28    7.90
  -6  -1   0  165.98    7.40
  -6  -1   0  168.38    6.60
  -6  -1   0  164.98    7.80
  -6  -1   0  169.48    5.60
   6   1   0  191.18    8.00
   6   1   0  173.98    8.00
   6   1   0  178.48    6.80
   6   1   0  169.18    8.00
   6   1   0  165.68    8.10
   6   1   0  173.78    6.90
   6   1   0  183.78    8.30
   6   1   0  190.38    8.20
   6   1   0  167.98    6.90
   6   1   0  175.18    7.90
   6   1   0  182.98    7.20
   6   1   0  163.58    8.20
   6   1   0  182.08    6.90
   6   1   0  183.98    8.00
   6   1   0  176.38    8.10
   6   1   0  176.18    7.40
   6   1   0  195.98    8.60
   6   1   0  160.98    8.10
   6   1   0  168.58    7.20
   6   1   0  167.78    8.30
  -7  -1   0    3.40    1.90
  -7  -1   0    1.50    1.70
  -7  -1   0    2.10    1.80
  -7  -1   0    2.10    1.30
  -7  -1   0    0.50    1.20
  -7  -1   0    1.20    1.30
  -7  -1   0    0.20    1.40
  -7  -1   0    1.30    0.90
  -7  -1   0    3.10    2.00
  -7  -1   0    1.90    1.10
  -7  -1   0    0.90    1.40
  -7  -1   0    0.70    1.30
  -7  -1   0    1.30    1.40
  -7  -1   0    1.70    1.30
   7   1   0   -0.10    1.10
   7   1   0    1.20    1.30
   7   1   0    0.40    1.30
   7   1   0   -0.40    1.30
   7   1   0   -0.70    1.30
   7   1   0    1.60    1.60
   7   1   0    0.20    1.40
   7   1   0    2.50    1.70
   7   1   0    1.20    1.50
   7   1   0    2.40    1.80
   7   1   0   -0.10    1.30
   7   1   0    1.20    1.60
   7   1   0    3.10    1.90
   7   1   0    1.40    1.80
   7   1   0    0.80    1.20
   7   1   0    0.30    1.50
   7   1   0    0.10    1.50
   7   1   0    1.40    1.30
   7   1   0    0.70    1.60
   7   1   0   -0.90    1.10
  -8  -1   0   77.59    5.10
  -8  -1   0   77.19    6.00
  -8  -1   0   80.09    6.10
  -8  -1   0   86.79    6.00
  -8  -1   0   87.19    5.80
  -8  -1   0   86.69    5.40
  -8  -1   0   78.89    5.80
  -8  -1   0   97.49    6.90
   8   1   0   68.79    4.90
   8   1   0   82.19    6.10
   8   1   0   86.89    5.10
   8   1   0   81.09    6.60
   8   1   0   69.39    5.00
   8   1   0   82.59    6.50
   8   1   0   82.99    5.20
   8   1   0   84.19    6.50
   8   1   0   87.59    5.20
   8   1   0   77.69    6.20
   8   1   0   79.19    5.40
   8   1   0   78.19    6.20
   8   1   0   75.19    6.10
   8   1   0   81.79    6.30
   8   1   0   79.49    5.70
   8   1   0   89.99    6.70
   8   1   0   75.39    7.40
   8   1   0   91.59    5.80
  -9  -1   0   48.00    6.40
  -9  -1   0   59.89    6.20
  -9  -1   0   67.99    7.50
  -9  -1   0   75.49    7.80
  -9  -1   0   75.09    7.40
  -9  -1   0   65.29    6.70
   9   1   0   72.99    5.40
   9   1   0   78.99    8.50
   9   1   0   61.99    7.70
   9   1   0   83.19    8.20
   9   1   0   66.19    4.90
   9   1   0   56.79    7.10
   9   1   0   62.39    4.80
   9   1   0   70.59    5.50
   9   1   0   80.79    8.20
   9   1   0   67.79    5.00
   9   1   0   64.29    7.50
   9   1   0   68.19    8.10
   9   1   0   70.59    7.40
   9   1   0   74.59    7.00
   9   1   0   60.19    6.90
 -10  -1   0   88.49    6.60
 -10  -1   0   91.29    6.90
 -10  -1   0   89.89    8.90
 -10  -1   0   89.29    6.90
 -10  -1   0   77.29    8.60
 -10  -1   0   98.19    9.40
  10   1   0   78.69    8.80
  10   1   0   84.19    7.80
  10   1   0   73.69    9.00
  10   1   0   73.29    8.40
  10   1   0   77.89    8.80
  10   1   0   77.79    8.90
  10   1   0   70.99    6.90
  10   1   0   90.89    9.20
  10   1   0   86.89    9.50
  10   1   0   91.19    9.20
  10   1   0   78.89    8.60
 -11  -1   0   73.29    8.40
 -11  -1   0   67.39    8.20
 -11  -1   0   69.79    9.00
 -11  -1   0   85.29    8.80
 -11  -1   0   60.79    8.00
 -11  -1   0   63.39    8.40
  11   1   0   78.69    8.10
  11   1   0   66.29    8.60
  11   1   0   83.49    9.70
  11   1   0   84.29    9.30
  11   1   0   61.79    8.40
  11   1   0  106.49   11.50
  11   1   0   70.99    8.60
  11   1   0   96.69   10.10
  11   1   0   67.49    7.20
 -12  -1   0   32.80    6.50
 -12  -1   0   32.40    5.90
 -12  -1   0   34.80    6.70
 -12  -1   0   42.60    6.90
 -12  -1   0   38.40    7.10
 -12  -1   0   27.60    6.70
  12   1   0   36.30    7.10
  12   1   0   49.00    7.40
  12   1   0   43.80    7.40
  12   1   0   34.00    6.60
  12   1   0   51.59    8.00
  12   1   0   27.80    6.60
  12   1   0   36.50    6.60
  13  -2   0   20.10    5.80
  13  -2   0   28.40    6.90
  13  -2   0   23.40    5.70
  13  -2   0   23.70    6.00
  13  -2   0   17.50    5.40
  13  -2   0   14.60    4.40
  13  -2   0   20.60    5.00
  13  -2   0   39.30    7.80
 -13   2   0   18.50    6.10
 -13   2   0   20.70    5.60
 -13   2   0   28.60    6.70
 -13   2   0   36.50    6.90
  12  -2   0   22.90    5.70
  12  -2   0   22.10    5.50
  12  -2   0   19.00    5.50
  12  -2   0   21.50    5.30
  12  -2   0   24.20    5.10
  12  -2   0   17.30    4.40
  12  -2   0   29.20    6.30
  12  -2   0   25.40    6.10
  12  -2   0   19.60    4.50
 -12   2   0   16.80    4.80
 -12   2   0   26.80    6.80
 -12   2   0   26.80    5.90
 -12   2   0   20.50    5.40
 -12   2   0   25.30    5.80
  11  -2   0   96.09    7.70
  11  -2   0  124.29   11.80
  11  -2   0  136.49    8.70
  11  -2   0  125.19    8.20
  11  -2   0  121.39    8.40
  11  -2   0  121.89    8.10
  11  -2   0  138.29    9.80
  11  -2   0  105.99   10.40
  11  -2   0  118.79   11.70
  11  -2   0  136.09    9.90
  11  -2   0  116.49    9.40
 -11   2   0  123.29    9.70
 -11   2   0  124.39   10.10
 -11   2   0  140.09    9.50
 -11   2   0  151.08   11.00
 -11   2   0  162.68   10.70
  10  -2   0  123.89    8.90
  10  -2   0  115.29    8.70
  10  -2   0  106.09    8.30
  10  -2   0  116.39    8.90
  10  -2   0  118.39    7.50
  10  -2   0  115.69    8.80
  10  -2   0  114.99    7.80
  10  -2   0  120.79    7.60
  10  -2   0  119.29    7.70
  10  -2   0  130.39    8.90
  10  -2   0  114.49    7.70
 -10   2   0  145.89   10.20
 -10   2   0  161.38   10.30
 -10   2   0  152.08    9.80
 -10   2   0  164.18    8.50
 -10   2   0  146.89    8.90
 -10   2   0  145.79    9.20
 -10   2   0  152.88    8.70
   9  -2   0   90.99    6.90
   9  -2   0   98.79    6.80
   9  -2   0  108.39    6.90
   9  -2   0   99.19    7.60
   9  -2   0  103.59    7.60
   9  -2   0  113.19    7.20
   9  -2   0  104.69    6.80
   9  -2   0   96.99    6.70
   9  -2   0  100.49    7.50
   9  -2   0   96.09    7.30
   9  -2   0   97.89    6.70
   9  -2   0   96.19    6.50
   9  -2   0  101.89    7.80
   9  -2   0  107.09    6.70
   9  -2   0  112.49    8.10
   9  -2   0   99.39    6.40
  -9   2   0  106.99    7.10
  -9   2   0  115.09    5.40
  -9   2   0  118.99    8.10
  -9   2   0  107.19    7.40
  -9   2   0  116.49    6.70
  -9   2   0  111.39    8.30
  -9   2   0  132.29    8.60
  -9   2   0  118.49    7.00
   8  -2   0    5.10    2.50
   8  -2   0    3.40    2.30
   8  -2   0    0.10    1.70
   8  -2   0    3.60    2.20
   8  -2   0    2.80    1.90
   8  -2   0    3.60    2.00
   8  -2   0    0.30    2.00
   8  -2   0    0.90    1.60
   8  -2   0    2.40    1.80
   8  -2   0    3.70    2.10
   8  -2   0    2.80    1.90
   8  -2   0    2.90    1.80
   8  -2   0    3.40    2.10
   8  -2   0    2.10    1.80
   8  -2   0    3.50    2.20
   8  -2   0    1.10    1.80
  -8   2   0    3.10    1.70
  -8   2   0    2.80    2.20
  -8   2   0    2.20    1.90
  -8   2   0    2.30    1.70
  -8   2   0    4.00    2.40
  -8   2   0    4.40    1.80
  -8   2   0    3.60    2.20
   7  -2   0  195.58    8.50
   7  -2   0  205.98    9.40
   7  -2   0  195.78    7.30
   7  -2   0  202.48    9.70
   7  -2   0  193.18    8.10
   7  -2   0  183.78    8.30
   7  -2   0  187.08    9.00
   7  -2   0  203.18    8.90
   7  -2   0  191.28    8.60
   7  -2   0  186.78    8.00
   7  -2   0  191.28    8.30
   7  -2   0  201.38    8.90
   7  -2   0  203.18    8.50
   7  -2   0  196.38    8.70
   7  -2   0  198.18    9.40
   7  -2   0  194.78    9.20
   7  -2   0  190.48    9.40
   7  -2   0  201.68    9.60
   7  -2   0  187.88    8.10
  -7   2   0  190.48    7.00
  -7   2   0  183.68    7.30
  -7   2   0  203.28    9.00
  -7   2   0  206.08    8.10
  -7   2   0  204.78   10.00
  -7   2   0  215.18    8.50
  -7   2   0  198.48    7.00
  -7   2   0  190.38    9.40
  -7   2   0  203.18    7.40
  -7   2   0  213.58    8.80
  -7   2   0  199.38    9.40
  -7   2   0  194.48    7.50
  -7   2   0  199.08    7.70
   6  -2   0  213.08    9.20
   6  -2   0  220.68    6.60
   6  -2   0  210.38    8.60
   6  -2   0  213.38    9.20
   6  -2   0  234.18    9.70
   6  -2   0  206.58    8.30
   6  -2   0  204.58    8.90
   6  -2   0  216.68    8.30
   6  -2   0  216.08    8.20
   6  -2   0  204.08    9.20
   6  -2   0  218.18    7.60
   6  -2   0  221.28    8.40
   6  -2   0  226.68    8.30
   6  -2   0  210.58    8.60
   6  -2   0  215.68    9.10
   6  -2   0  224.38    7.60
   6  -2   0  202.58    7.90
   6  -2   0  208.78    9.20
   6  -2   0  201.68    8.50
   6  -2   0  218.88    8.80
   6  -2   0  221.18    6.80
   6  -2   0  201.28    8.30
  -6   2   0  223.68    7.30
  -6   2   0  224.78    7.30
  -6   2   0  221.38    7.50
  -6   2   0  218.78    7.40
  -6   2   0  233.98    8.70
  -6   2   0  231.58    8.10
  -6   2   0  229.38    9.00
  -6   2   0  219.98    7.60
  -6   2   0  232.58    8.40
  -6   2   0  211.68    9.20
  -6   2   0  226.08    9.60
  -6   2   0  220.88    7.40
   5  -2   0   94.79    4.60
   5  -2   0   93.39    5.40
   5  -2   0   86.19    5.10
   5  -2   0   94.09    4.60
   5  -2   0   96.89    4.20
   5  -2   0   93.29    4.70
   5  -2   0   88.99    5.20
   5  -2   0   93.59    4.90
   5  -2   0   89.79    4.70
   5  -2   0   94.19    3.90
   5  -2   0   91.89    4.80
   5  -2   0   91.49    4.90
   5  -2   0   87.69    5.20
   5  -2   0   96.89    5.30
   5  -2   0   96.39    3.70
   5  -2   0   96.99    4.50
   5  -2   0   91.69    4.10
   5  -2   0   92.19    4.90
   5  -2   0   96.29    4.90
   5  -2   0   92.39    5.20
   5  -2   0   91.49    5.10
   5  -2   0   93.89    4.60
  -5   2   0   81.79    3.70
  -5   2   0   89.79    5.30
  -5   2   0   75.49    4.70
  -5   2   0   92.09    3.70
  -5   2   0   79.79    4.50
  -5   2   0   80.89    3.70
  -5   2   0   85.49    4.30
  -5   2   0   82.79    3.70
  -5   2   0   80.89    4.00
  -5   2   0   78.39    3.60
  -5   2   0   82.89    3.60
  -5   2   0   72.89    3.70
  -5   2   0   79.49    4.80
   4  -2   0  383.36   10.50
   4  -2   0  366.96   11.60
   4  -2   0  363.86   10.70
   4  -2   0  365.76   11.20
   4  -2   0  369.76    9.70
   4  -2   0  370.46    9.80
   4  -2   0  344.17   10.00
   4  -2   0  359.26   11.10
   4  -2   0  357.86   10.00
   4  -2   0  365.96   11.70
   4  -2   0  378.96   11.80
   4  -2   0  377.26   11.00
   4  -2   0  363.76   11.00
   4  -2   0  365.76   10.70
   4  -2   0  356.06   11.00
   4  -2   0  380.66   10.50
   4  -2   0  330.17   11.20
   4  -2   0  357.56   10.40
   4  -2   0  374.16   11.40
   4  -2   0  363.36   11.40
   4  -2   0  347.57   11.30
  -4   2   0  351.96   10.10
  -4   2   0  353.66    9.70
  -4   2   0  351.36    9.70
  -4   2   0  354.06    9.60
  -4   2   0  358.86    9.30
  -4   2   0  350.86   11.20
  -4   2   0  350.06   11.10
  -4   2   0  338.17    9.60
  -4   2   0  343.27   11.40
  -4   2   0  352.76    9.90
  -4   2   0  355.36    9.40
  -4   2   0  334.77   10.50
  -4   2   0  352.26    9.70
   3  -2   0  149.88    4.10
   3  -2   0  143.69    4.60
   3  -2   0  130.39    5.50
   3  -2   0  147.39    5.40
   3  -2   0  149.88    5.40
   3  -2   0  138.19    4.60
   3  -2   0  148.99    4.90
   3  -2   0  148.59    4.70
   3  -2   0  148.49    5.60
   3  -2   0  141.09    4.80
   3  -2   0  144.79    5.10
   3  -2   0  136.29    5.10
   3  -2   0  148.29    3.90
   3  -2   0  144.59    5.40
   3  -2   0  141.19    5.00
   3  -2   0  150.08    5.80
   3  -2   0  141.19    5.40
   3  -2   0  145.59    5.50
   3  -2   0  146.49    5.60
   3  -2   0  146.79    4.10
   3  -2   0  143.69    4.30
   3  -2   0  145.19    4.80
   3  -2   0  144.49    5.20
   3  -2   0  143.09    5.00
   3  -2   0  147.49    5.70
   3  -2   0  143.79    5.60
   3  -2   0  141.79    5.30
  -3   2   0  126.69    4.30
  -3   2   0  120.89    3.90
  -3   2   0  123.29    5.30
  -3   2   0  118.59    4.30
  -3   2   0  132.79    5.10
  -3   2   0  118.29    4.00
  -3   2   0  122.09    4.30
  -3   2   0  122.39    4.10
  -3   2   0  121.79    4.20
  -3   2   0  122.19    4.70
  -3   2   0  122.39    4.40
  -3   2   0  121.39    3.70
  -3   2   0  115.99    5.00
  -3   2   0  124.59    3.70
   2  -2   0   44.50    2.10
   2  -2   0   44.70    2.30
   2  -2   0   45.70    2.60
   2  -2   0   45.30    1.70
   2  -2   0   48.40    2.00
   2  -2   0   48.20    1.90
   2  -2   0   48.50    1.60
   2  -2   0   44.90    2.40
   2  -2   0   42.00    2.40
   2  -2   0   45.20    2.30
   2  -2   0   44.70    2.40
   2  -2   0   44.20    2.30
   2  -2   0   42.90    1.90
   2  -2   0   49.20    2.10
   2  -2   0   48.50    2.10
   2  -2   0   48.00    2.50
   2  -2   0   44.80    2.10
   2  -2   0   47.90    2.60
   2  -2   0   46.40    2.30
   2  -2   0   42.40    2.20
   2  -2   0   45.50    2.00
   2  -2   0   46.80    2.40
   2  -2   0   47.40    2.40
   2  -2   0   46.80    2.50
   2  -2   0   45.00    2.40
   2  -2   0   45.30    2.40
   2  -2   0   41.80    2.40
   2  -2   0   48.10    2.50
   2  -2   0   49.90    2.10
  -2   2   0   41.90    1.70
  -2   2   0   41.80    2.50
  -2   2   0   42.60    1.70
  -2   2   0   40.40    2.10
  -2   2   0   42.50    1.70
  -2   2   0   40.30    2.50
  -2   2   0   43.80    1.30
  -2   2   0   43.80    2.20
  -2   2   0   42.80    2.30
  -2   2   0   41.70    2.40
  -2   2   0   42.20    2.20
  -2   2   0   42.80    2.40
  -2   2   0   41.50    1.60
  -2   2   0   43.10    2.10
   1  -2   0  966.60   22.20
   1  -2   0  923.61   22.20
   1  -2   0  947.91   21.40
   1  -2   0  965.30   22.30
   1  -2   0  975.80   22.40
   1  -2   0  940.41   22.00
   1  -2   0  970.60   22.30
   1  -2   0  984.20   22.40
   1  -2   0  934.01   22.30
   1  -2   0  914.01   22.20
   1  -2   0  976.40   21.80
   1  -2   0  972.30   21.30
   1  -2   0  944.81   22.00
   1  -2   0  950.10   22.40
   1  -2   0  977.60   22.40
   1  -2   0  943.91   22.00
   1  -2   0  922.91   22.00
   1  -2   0  930.21   22.00
   1  -2   0  943.81   22.10
   1  -2   0  973.80   22.30
   1  -2   0  949.60   22.30
   1  -2   0  956.00   22.30
   1  -2   0  971.40   22.20
   1  -2   0  951.70   21.40
  -1   2   0  976.40   23.10
  -1   2   0  965.70   23.00
  -1   2   0  970.60   22.00
  -1   2   0 1006.00   23.00
  -1   2   0  977.40   22.00
  -1   2   0  973.80   22.90
  -1   2   0  980.20   22.70
  -1   2   0 1012.00   23.00
  -1   2   0  953.70   23.20
  -1   2   0  974.50   23.00
  -1   2   0  988.20   23.10
  -1   2   0  988.00   22.00
  -1   2   0  998.00   22.10
  -1   2   0  966.10   23.10
  -1   2   0  989.40   22.70
  -1   2   0 1000.90   22.10
   0  -2   0  521.45   12.60
   0  -2   0  520.85   12.80
   0  -2   0  501.05   12.90
   0  -2   0  517.75   12.10
   0  -2   0  514.45   12.70
   0  -2   0  511.65   12.30
   0  -2   0  514.25   12.80
   0  -2   0  534.85   12.70
   0  -2   0  517.25   12.30
   0  -2   0  516.85   12.50
   0  -2   0  525.55   12.60
   0  -2   0  531.45   12.60
   0  -2   0  546.95   13.00
   0  -2   0  519.35   12.60
   0  -2   0  538.55   13.00
   0  -2   0  523.95   13.00
   0  -2   0  516.75   11.90
   0  -2   0  528.05   12.80
   0  -2   0  523.25   12.00
   0   2   0  522.35   13.10
   0   2   0  541.75   12.70
   0   2   0  521.15   13.00
   0   2   0  526.65   12.60
   0   2   0  535.05   12.90
   0   2   0  525.45   12.80
   0   2   0  526.35   12.50
   0   2   0  548.25   13.00
   0   2   0  515.65   12.40
   0   2   0  515.55   12.60
   0   2   0  535.25   12.70
   0   2   0  527.55   12.20
   0   2   0  553.24   12.90
   0   2   0  512.75   12.20
   0   2   0  526.65   12.50
   0   2   0  537.55   12.90
   0   2   0  512.95   12.90
  -1  -2   0  304.87    8.00
  -1  -2   0  305.97    8.40
  -1  -2   0  307.27    7.90
  -1  -2   0  302.77    7.10
  -1  -2   0  306.57    8.20
  -1  -2   0  311.67    8.40
  -1  -2   0  310.27    7.40
  -1  -2   0  302.87    8.00
  -1  -2   0  293.67    8.20
  -1  -2   0  303.07    8.30
  -1  -2   0  296.17    7.80
  -1  -2   0  301.07    7.10
  -1  -2   0  310.67    8.50
  -1  -2   0  299.17    8.40
  -1  -2   0  320.87    8.60
  -1  -2   0  301.27    8.50
   1   2   0  315.77    8.50
   1   2   0  351.16    9.00
   1   2   0  328.87    7.60
   1   2   0  332.27    8.70
   1   2   0  318.97    8.80
   1   2   0  317.97    8.50
   1   2   0  305.17    8.70
   1   2   0  320.57    7.60
   1   2   0  323.67    9.00
   1   2   0  318.97    8.50
   1   2   0  318.77    8.50
   1   2   0  322.47    8.70
   1   2   0  333.97    8.70
   1   2   0  315.77    8.20
   1   2   0  330.77    8.40
   1   2   0  326.57    7.60
   1   2   0  318.17    8.70
   1   2   0  312.07    8.20
   1   2   0  315.87    8.30
   1   2   0  313.57    8.20
   1   2   0  325.07    7.80
  -2  -2   0  316.67    8.90
  -2  -2   0  313.77    7.20
  -2  -2   0  301.87    8.00
  -2  -2   0  304.97    7.20
  -2  -2   0  309.27    8.40
  -2  -2   0  299.77    8.30
  -2  -2   0  303.27    8.00
  -2  -2   0  306.07    8.60
  -2  -2   0  297.17    9.00
  -2  -2   0  312.37    9.00
  -2  -2   0  313.47    8.30
  -2  -2   0  307.97    7.40
  -2  -2   0  301.87    8.70
  -2  -2   0  303.37    8.10
  -2  -2   0  300.77    9.20
  -2  -2   0  304.47    7.10
  -2  -2   0  295.07    8.00
  -2  -2   0  292.97    9.20
   2   2   0  304.87    7.80
   2   2   0  303.17    7.50
   2   2   0  306.67    8.80
   2   2   0  285.47    8.80
   2   2   0  304.37    7.30
   2   2   0  301.27    7.70
   2   2   0  314.07    7.80
   2   2   0  298.77    7.70
   2   2   0  301.47    9.00
   2   2   0  298.17    8.00
   2   2   0  301.97    8.20
   2   2   0  306.97    8.60
   2   2   0  295.27    9.00
   2   2   0  301.07    8.80
   2   2   0  301.27    8.70
   2   2   0  303.87    7.30
   2   2   0  306.37    8.40
   2   2   0  306.67    8.70
   2   2   0  300.07    7.80
   2   2   0  297.17    8.60
   2   2   0  298.87    8.70
   2   2   0  297.37    8.90
   2   2   0  305.47    8.70
   2   2   0  299.87    9.00
   2   2   0  313.67    8.80
  -3  -2   0  397.56   10.00
  -3  -2   0  390.66    9.60
  -3  -2   0  391.96    9.40
  -3  -2   0  391.76   10.20
  -3  -2   0  371.66   10.20
  -3  -2   0  369.26   11.20
  -3  -2   0  387.16   11.90
  -3  -2   0  388.06   11.10
  -3  -2   0  386.06   11.20
  -3  -2   0  384.26    9.30
  -3  -2   0  390.06   10.30
  -3  -2   0  394.86   11.70
  -3  -2   0  402.86   11.80
  -3  -2   0  393.86   10.30
  -3  -2   0  396.86   10.20
  -3  -2   0  381.06    9.40
  -3  -2   0  387.06   10.60
  -3  -2   0  397.36   11.30
  -3  -2   0  390.86   10.40
  -3  -2   0  379.96   11.50
   3   2   0  342.87   10.60
   3   2   0  361.66    9.40
   3   2   0  357.76    9.40
   3   2   0  342.17   10.80
   3   2   0  358.06   10.80
   3   2   0  358.76    9.10
   3   2   0  351.06    9.60
   3   2   0  359.16    9.40
   3   2   0  367.86    8.80
   3   2   0  355.36   10.30
   3   2   0  355.96   11.00
   3   2   0  353.26   10.80
   3   2   0  360.76   10.60
   3   2   0  366.16    8.90
   3   2   0  352.36   10.80
   3   2   0  346.37   10.60
   3   2   0  362.96    9.40
   3   2   0  366.36   11.00
   3   2   0  354.66   10.70
   3   2   0  356.76   10.50
   3   2   0  358.56   10.60
   3   2   0  360.26    9.50
  -4  -2   0  117.39    3.90
  -4  -2   0  116.99    4.30
  -4  -2   0  116.89    5.70
  -4  -2   0  118.59    5.30
  -4  -2   0  122.59    6.00
  -4  -2   0  118.29    5.50
  -4  -2   0  112.59    4.50
  -4  -2   0  109.99    5.50
  -4  -2   0  123.09    4.60
  -4  -2   0  120.49    3.90
  -4  -2   0  120.19    4.30
  -4  -2   0  113.49    4.20
  -4  -2   0  118.19    5.50
  -4  -2   0  118.49    4.10
  -4  -2   0  110.79    4.30
  -4  -2   0  122.29    5.20
  -4  -2   0  120.59    5.20
  -4  -2   0  124.79    4.50
   4   2   0  134.39    4.50
   4   2   0  127.49    5.80
   4   2   0  123.19    5.70
   4   2   0  127.79    4.60
   4   2   0  115.79    4.30
   4   2   0  133.59    5.70
   4   2   0  128.79    5.80
   4   2   0  121.49    4.20
   4   2   0  105.99    5.50
   4   2   0  121.29    4.90
   4   2   0  126.39    6.00
   4   2   0  118.19    5.20
   4   2   0  113.69    4.70
   4   2   0  119.89    5.70
   4   2   0  111.39    5.70
   4   2   0  124.89    4.50
   4   2   0  116.09    5.70
   4   2   0  125.39    5.90
   4   2   0  114.69    5.50
   4   2   0  122.39    5.70
   4   2   0  129.59    5.50
   4   2   0  121.79    4.60
  -5  -2   0  345.07   11.20
  -5  -2   0  355.56   10.00
  -5  -2   0  347.47   11.90
  -5  -2   0  355.16   10.00
  -5  -2   0  348.37    9.90
  -5  -2   0  337.67   12.50
  -5  -2   0  371.06   12.30
  -5  -2   0  352.86   11.90
  -5  -2   0  355.46   11.30
  -5  -2   0  351.46    9.70
  -5  -2   0  353.16   10.20
  -5  -2   0  369.86   12.40
  -5  -2   0  367.66   10.40
  -5  -2   0  358.26   10.20
  -5  -2   0  367.16    9.80
  -5  -2   0  362.56   11.50
  -5  -2   0  356.56   10.30
   5   2   0  351.26   10.40
   5   2   0  344.17    9.40
   5   2   0  342.27   11.60
   5   2   0  352.56    9.70
   5   2   0  364.86   12.10
   5   2   0  358.96   10.40
   5   2   0  353.16   11.30
   5   2   0  337.07   12.00
   5   2   0  330.77   12.10
   5   2   0  342.47   12.10
   5   2   0  350.06   10.50
   5   2   0  349.37   12.40
   5   2   0  371.26   11.90
   5   2   0  353.16   12.20
   5   2   0  345.27   12.10
   5   2   0  369.06   10.90
   5   2   0  354.86   11.20
   5   2   0  345.17   12.10
   5   2   0  351.26   10.80
   5   2   0  357.76   10.20
   5   2   0  360.86   12.40
  -6  -2   0  236.58    7.40
  -6  -2   0  231.88    8.90
  -6  -2   0  240.38    7.90
  -6  -2   0  237.18    9.50
  -6  -2   0  217.18    9.30
  -6  -2   0  223.18    8.70
  -6  -2   0  242.18    7.80
  -6  -2   0  242.78   10.40
  -6  -2   0  224.88    9.60
  -6  -2   0  235.28    7.50
  -6  -2   0  234.88    7.50
  -6  -2   0  240.78   10.00
  -6  -2   0  229.18    7.90
  -6  -2   0  229.38    7.40
  -6  -2   0  224.78    7.50
  -6  -2   0  242.98    8.90
  -6  -2   0  238.78    7.40
  -6  -2   0  226.68    7.20
   6   2   0  228.48    6.80
   6   2   0  226.48    8.40
   6   2   0  226.88    9.70
   6   2   0  231.38    7.90
   6   2   0  229.18    7.90
   6   2   0  231.08   10.00
   6   2   0  208.58    9.10
   6   2   0  226.28    9.40
   6   2   0  242.58   10.00
   6   2   0  225.08    9.60
   6   2   0  226.08    8.80
   6   2   0  232.28    8.20
   6   2   0  234.48    7.10
   6   2   0  218.68    9.40
   6   2   0  228.68    8.00
   6   2   0  218.68    9.70
   6   2   0  225.78    8.50
   6   2   0  205.78    9.60
   6   2   0  223.78    9.80
   6   2   0  215.68    8.20
   6   2   0  221.88    9.70
  -7  -2   0  332.87   10.60
  -7  -2   0  315.67   12.30
  -7  -2   0  329.07   10.00
  -7  -2   0  319.47   13.20
  -7  -2   0  343.67   13.70
  -7  -2   0  318.87   11.60
  -7  -2   0  330.17    9.60
  -7  -2   0  310.17   10.30
  -7  -2   0  320.27   11.20
  -7  -2   0  322.47   12.30
  -7  -2   0  319.07   11.40
  -7  -2   0  322.27   12.90
  -7  -2   0  320.27    9.90
  -7  -2   0  337.27   12.70
  -7  -2   0  330.97    9.90
   7   2   0  359.06   11.70
   7   2   0  339.67   13.00
   7   2   0  347.67   13.50
   7   2   0  353.56   11.70
   7   2   0  369.06   14.00
   7   2   0  349.17   11.40
   7   2   0  344.87   13.20
   7   2   0  371.86   14.00
   7   2   0  315.77   13.30
   7   2   0  346.97   13.10
   7   2   0  334.47   13.80
   7   2   0  343.57   13.50
   7   2   0  338.67   11.10
   7   2   0  353.56   13.70
   7   2   0  336.87   13.70
   7   2   0  359.16   12.00
   7   2   0  341.27   11.20
  -8  -2   0   79.19    4.20
  -8  -2   0   83.99    5.30
  -8  -2   0   81.99    5.40
  -8  -2   0   81.59    6.30
  -8  -2   0   70.79    5.70
  -8  -2   0   66.69    6.90
  -8  -2   0   79.49    8.00
  -8  -2   0   77.19    5.80
  -8  -2   0   74.99    5.10
  -8  -2   0   90.49    6.10
   8   2   0   89.59    7.00
   8   2   0   86.99    6.30
   8   2   0   85.79    5.10
   8   2   0   92.79    6.60
   8   2   0   80.69    6.20
   8   2   0   74.99    5.20
   8   2   0   87.19    5.10
   8   2   0   93.39    6.90
   8   2   0   84.89    5.00
   8   2   0   92.89    6.80
   8   2   0   84.69    8.30
   8   2   0   82.59    6.60
   8   2   0   82.89    6.60
   8   2   0   85.09    5.30
   8   2   0   91.59    6.80
   8   2   0  104.69   10.50
   8   2   0   84.09    6.80
  -9  -2   0   14.60    3.40
  -9  -2   0   12.30    3.50
  -9  -2   0   15.50    4.30
  -9  -2   0    8.40    3.00
  -9  -2   0   12.80    3.50
  -9  -2   0   12.50    3.60
  -9  -2   0   11.20    2.10
   9   2   0   12.40    3.60
   9   2   0    9.40    3.40
   9   2   0   17.90    3.30
   9   2   0   17.70    4.30
   9   2   0   16.00    4.10
   9   2   0    9.30    3.60
   9   2   0   20.80    4.40
   9   2   0    7.80    3.10
   9   2   0   11.40    3.60
   9   2   0   14.70    3.30
   9   2   0   17.00    4.00
 -10  -2   0   35.70    6.00
 -10  -2   0   49.10    6.50
 -10  -2   0   42.30    5.80
 -10  -2   0   37.00    5.70
 -10  -2   0   42.60    6.50
 -10  -2   0   33.20    6.00
  10   2   0   29.50    5.70
  10   2   0   43.60    5.60
  10   2   0   43.60    6.90
  10   2   0   38.00    6.00
  10   2   0   44.10    7.20
  10   2   0   38.90    6.90
  10   2   0   31.40    4.60
  10   2   0   50.19    7.40
  10   2   0   47.80    6.90
  10   2   0   35.30    5.90
  10   2   0   41.40    6.80
 -11  -2   0   45.60    7.20
 -11  -2   0   46.40    7.00
 -11  -2   0   55.59    7.30
 -11  -2   0   63.59    8.50
 -11  -2   0   45.10    7.10
  11   2   0   62.59    8.00
  11   2   0   45.00    7.30
  11   2   0   50.19    7.90
  11   2   0   53.59    7.80
  11   2   0   50.39    7.50
  11   2   0   50.99    7.80
  11   2   0   57.49    8.20
  11   2   0   57.89    7.70
 -12  -2   0    7.20    4.10
 -12  -2   0   13.80    4.80
 -12  -2   0    6.90    4.10
 -12  -2   0    5.10    3.60
 -12  -2   0   10.40    4.30
 -12  -2   0    9.40    4.00
  12   2   0    8.00    4.30
  12   2   0    1.40    3.40
  12   2   0    2.40    3.20
  12   2   0    3.50    3.10
  12   2   0    3.00    3.30
  12   2   0    3.40    3.40
  12   2   0    5.60    3.60
  13  -3   0    6.90    4.10
  13  -3   0    9.10    3.80
  13  -3   0    4.10    3.70
  13  -3   0    5.90    3.30
  13  -3   0    3.80    3.20
  13  -3   0   11.00    4.60
 -13   3   0    5.20    3.90
 -13   3   0    7.10    4.10
 -13   3   0    2.20    4.00
 -13   3   0   13.20    4.90
  12  -3   0    7.70    3.50
  12  -3   0   12.70    4.70
  12  -3   0   19.20    5.00
  12  -3   0   13.50    4.30
  12  -3   0   17.10    4.60
  12  -3   0    6.40    4.10
  12  -3   0    5.20    3.10
  12  -3   0   11.30    3.70
  12  -3   0   10.90    3.70
 -12   3   0   15.40    5.00
 -12   3   0   11.80    4.10
 -12   3   0   11.30    4.60
 -12   3   0   21.70    5.60
 -12   3   0   19.60    5.40
  11  -3   0    0.40    2.70
  11  -3   0    6.60    3.10
  11  -3   0    8.00    3.10
  11  -3   0    7.70    3.30
  11  -3   0    6.40    3.50
  11  -3   0    6.00    2.80
  11  -3   0    6.60    3.10
  11  -3   0    7.70    3.90
  11  -3   0    5.90    2.90
 -11   3   0    5.00    3.60
 -11   3   0    5.20    3.30
 -11   3   0    1.30    2.40
 -11   3   0    6.50    3.70
 -11   3   0    4.30    3.40
  10  -3   0    8.20    3.00
  10  -3   0    8.20    3.50
  10  -3   0    6.70    3.40
  10  -3   0   13.50    4.40
  10  -3   0   13.70    4.20
  10  -3   0   10.10    3.30
  10  -3   0   11.20    3.60
  10  -3   0   16.90    4.30
  10  -3   0   16.60    4.00
  10  -3   0   15.40    3.70
  10  -3   0    7.20    3.10
  10  -3   0    7.80    3.40
 -10   3   0   16.10    2.70
 -10   3   0   12.80    3.80
 -10   3   0   19.80    4.90
 -10   3   0   14.70    4.60
 -10   3   0   14.40    3.80
 -10   3   0   18.20    4.70
   9  -3   0  143.19    8.30
   9  -3   0  136.09    8.70
   9  -3   0  137.49    9.00
   9  -3   0  144.49    8.40
   9  -3   0  144.69    8.80
   9  -3   0  151.18    9.10
   9  -3   0  128.29    8.80
   9  -3   0  132.09    7.80
   9  -3   0  145.99    8.20
   9  -3   0  145.89    7.90
   9  -3   0  150.98    8.60
   9  -3   0  139.09    8.00
   9  -3   0  142.59    9.20
   9  -3   0  136.99    8.70
  -9   3   0  157.08    8.90
  -9   3   0  164.08    6.90
  -9   3   0  153.78    7.90
  -9   3   0  166.78    7.70
  -9   3   0  154.88   10.00
  -9   3   0  147.79    9.70
  -9   3   0  150.48    9.30
  -9   3   0  165.68    9.80
  -9   3   0  151.18    8.10
   8  -3   0  182.48    7.90
   8  -3   0  197.78    8.60
   8  -3   0  171.78    9.20
   8  -3   0  176.28    8.80
   8  -3   0  173.08    8.90
   8  -3   0  181.18    8.50
   8  -3   0  167.98    9.30
   8  -3   0  164.18    8.40
   8  -3   0  166.28    9.10
   8  -3   0  169.58    8.60
   8  -3   0  166.78    9.40
   8  -3   0  178.48    9.40
   8  -3   0  165.28    8.60
   8  -3   0  168.68    9.20
   8  -3   0  167.68    7.80
   8  -3   0  182.38    9.80
  -8   3   0  156.98    9.40
  -8   3   0  148.39    8.80
  -8   3   0  166.98    9.10
  -8   3   0  173.58    7.40
  -8   3   0  175.48    9.90
  -8   3   0  164.78    8.50
  -8   3   0  161.48    7.80
  -8   3   0  165.28    6.70
  -8   3   0  169.88    7.70
   7  -3   0  124.99    6.10
   7  -3   0  119.09    6.30
   7  -3   0  117.59    6.70
   7  -3   0  110.89    6.50
   7  -3   0  119.89    7.10
   7  -3   0  113.19    6.20
   7  -3   0  134.19    6.10
   7  -3   0  122.29    4.70
   7  -3   0  109.69    7.00
   7  -3   0  107.89    6.80
   7  -3   0  114.69    5.40
   7  -3   0  117.49    7.30
   7  -3   0  124.09    6.80
   7  -3   0  101.49    6.70
   7  -3   0  117.89    6.50
   7  -3   0  119.79    5.00
   7  -3   0   97.39    6.50
   7  -3   0  132.89    7.40
   7  -3   0  127.89    6.70
  -7   3   0  134.99    5.90
  -7   3   0  146.19    8.20
  -7   3   0  118.39    7.60
  -7   3   0  128.89    6.90
  -7   3   0  128.39    5.60
  -7   3   0  127.99    5.80
  -7   3   0  145.49    7.80
  -7   3   0  131.99    7.60
  -7   3   0  131.99    6.20
  -7   3   0  113.29    5.60
  -7   3   0  127.09    6.30
   6  -3   0   69.99    4.90
   6  -3   0   83.99    5.60
   6  -3   0   91.09    5.70
   6  -3   0   79.49    5.30
   6  -3   0   91.89    5.40
   6  -3   0   87.69    3.80
   6  -3   0   86.19    5.00
   6  -3   0   95.29    5.50
   6  -3   0   91.19    5.70
   6  -3   0   92.99    4.70
   6  -3   0   83.39    4.20
   6  -3   0   91.59    5.30
   6  -3   0   80.29    5.00
   6  -3   0   89.39    5.00
   6  -3   0   92.09    4.30
   6  -3   0   87.09    5.60
   6  -3   0   91.79    5.80
   6  -3   0   74.79    5.20
   6  -3   0   84.09    4.60
  -6   3   0   75.79    3.50
  -6   3   0   73.79    5.10
  -6   3   0   79.39    4.20
  -6   3   0   77.29    3.40
  -6   3   0   77.29    4.20
  -6   3   0   77.99    5.60
  -6   3   0   75.59    3.90
  -6   3   0   76.29    3.90
  -6   3   0   72.09    5.50
  -6   3   0   93.89    5.20
  -6   3   0   68.69    5.10
  -6   3   0   82.89    4.20
  -6   3   0   76.19    4.30
  -6   3   0   78.39    4.20
   5  -3   0   46.70    3.40
   5  -3   0   47.20    3.10
   5  -3   0   50.09    3.70
   5  -3   0   48.80    3.70
   5  -3   0   43.90    4.40
   5  -3   0   49.40    3.10
   5  -3   0   49.80    3.60
   5  -3   0   53.79    3.00
   5  -3   0   46.10    3.60
   5  -3   0   49.10    3.10
   5  -3   0   54.59    5.10
   5  -3   0   46.00    3.50
   5  -3   0   55.39    4.20
   5  -3   0   50.99    3.10
   5  -3   0   48.50    4.70
   5  -3   0   48.40    3.40
   5  -3   0   50.69    3.90
   5  -3   0   57.19    2.90
  -5   3   0   61.69    3.40
  -5   3   0   57.69    3.70
  -5   3   0   64.19    3.40
  -5   3   0   58.29    4.50
  -5   3   0   59.59    3.20
  -5   3   0   63.69    3.10
  -5   3   0   59.59    2.60
  -5   3   0   53.59    4.00
  -5   3   0   53.79    4.00
  -5   3   0   51.89    4.20
  -5   3   0   56.99    2.60
  -5   3   0   59.29    3.40
  -5   3   0   60.29    3.40
  -5   3   0   47.30    3.20
   4  -3   0  250.87    8.80
   4  -3   0  264.97    9.30
   4  -3   0  269.97    8.70
   4  -3   0  246.48    9.20
   4  -3   0  256.97    8.80
   4  -3   0  255.87    9.00
   4  -3   0  256.97    6.80
   4  -3   0  232.48    8.90
   4  -3   0  243.78    7.40
   4  -3   0  258.67    6.90
   4  -3   0  250.97    8.90
   4  -3   0  250.17    7.70
   4  -3   0  263.77    8.90
   4  -3   0  255.57    7.80
   4  -3   0  269.47    8.60
   4  -3   0  253.37    7.70
   4  -3   0  261.17    7.00
   4  -3   0  253.17    8.30
   4  -3   0  254.37    7.60
   4  -3   0  267.27    8.70
   4  -3   0  243.18    8.70
   4  -3   0  249.28    8.80
   4  -3   0  255.67    8.10
   4  -3   0  252.07    7.80
   4  -3   0  258.67    7.90
  -4   3   0  278.67    8.80
  -4   3   0  255.37    9.50
  -4   3   0  267.17    6.90
  -4   3   0  262.97    6.80
  -4   3   0  265.37    8.50
  -4   3   0  252.77    9.20
  -4   3   0  266.67    6.60
  -4   3   0  262.97    9.20
  -4   3   0  270.67    8.40
  -4   3   0  272.17    7.70
  -4   3   0  272.67    7.50
  -4   3   0  267.37    8.20
  -4   3   0  257.57    7.80
  -4   3   0  250.67    8.20
  -4   3   0  259.07    9.60
   3  -3   0  238.98    7.30
   3  -3   0  237.58    6.90
   3  -3   0  237.18    7.00
   3  -3   0  227.58    7.80
   3  -3   0  236.98    7.90
   3  -3   0  238.08    7.80
   3  -3   0  227.88    7.60
   3  -3   0  243.38    7.80
   3  -3   0  232.88    7.80
   3  -3   0  237.18    7.60
   3  -3   0  235.38    7.00
   3  -3   0  233.68    7.90
   3  -3   0  238.38    7.50
   3  -3   0  229.68    8.10
   3  -3   0  240.98    6.60
   3  -3   0  245.18    8.20
   3  -3   0  243.98    6.00
   3  -3   0  230.78    7.50
   3  -3   0  226.68    7.80
   3  -3   0  236.88    6.90
   3  -3   0  238.58    6.90
   3  -3   0  237.58    7.50
   3  -3   0  234.18    6.90
   3  -3   0  240.38    7.90
   3  -3   0  229.38    6.90
  -3   3   0  222.58    7.90
  -3   3   0  222.88    7.20
  -3   3   0  224.28    6.20
  -3   3   0  221.28    7.70
  -3   3   0  222.38    8.00
  -3   3   0  230.98    7.50
  -3   3   0  232.38    7.20
  -3   3   0  214.88    7.60
  -3   3   0  227.68    7.30
  -3   3   0  221.08    6.30
  -3   3   0  228.68    7.40
  -3   3   0  234.98    6.20
  -3   3   0  226.38    6.10
   2  -3   0  544.45   14.20
   2  -3   0  548.15   14.40
   2  -3   0  549.95   14.30
   2  -3   0  549.25   14.50
   2  -3   0  552.64   14.40
   2  -3   0  533.35   14.10
   2  -3   0  573.14   15.30
   2  -3   0  560.74   14.20
   2  -3   0  542.85   14.40
   2  -3   0  539.15   14.30
   2  -3   0  548.25   13.20
   2  -3   0  540.55   14.10
   2  -3   0  519.35   14.30
   2  -3   0  544.65   14.10
   2  -3   0  556.74   14.20
   2  -3   0  540.35   14.40
   2  -3   0  557.84   12.50
   2  -3   0  541.05   14.10
   2  -3   0  567.24   12.60
   2  -3   0  542.45   13.70
   2  -3   0  568.34   13.80
   2  -3   0  546.05   13.70
   2  -3   0  528.15   14.40
   2  -3   0  555.84   13.90
  -2   3   0  518.25   13.90
  -2   3   0  520.25   12.10
  -2   3   0  503.85   13.70
  -2   3   0  514.35   12.20
  -2   3   0  510.95   11.80
  -2   3   0  531.85   12.90
  -2   3   0  527.35   13.30
  -2   3   0  525.95   13.80
  -2   3   0  511.85   12.20
  -2   3   0  524.85   13.60
  -2   3   0  506.25   13.80
  -2   3   0  508.25   13.70
  -2   3   0  512.55   13.40
  -2   3   0  505.75   13.90
   1  -3   0  265.97    6.90
   1  -3   0  268.47    7.30
   1  -3   0  269.57    7.60
   1  -3   0  266.67    7.70
   1  -3   0  268.07    7.70
   1  -3   0  272.17    6.90
   1  -3   0  261.77    7.20
   1  -3   0  274.87    7.70
   1  -3   0  265.07    7.50
   1  -3   0  259.47    7.80
   1  -3   0  259.97    7.20
   1  -3   0  268.87    7.80
   1  -3   0  261.57    7.70
   1  -3   0  266.77    7.90
   1  -3   0  266.97    7.70
   1  -3   0  271.67    7.80
   1  -3   0  268.97    8.00
   1  -3   0  278.27    7.90
   1  -3   0  258.07    7.50
   1  -3   0  267.87    7.50
   1  -3   0  268.17    7.70
   1  -3   0  260.67    8.00
  -1   3   0  224.68    6.80
  -1   3   0  223.58    6.80
  -1   3   0  215.58    6.70
  -1   3   0  232.18    6.70
  -1   3   0  220.28    7.10
  -1   3   0  230.28    6.90
  -1   3   0  232.98    6.80
  -1   3   0  223.18    7.00
  -1   3   0  229.08    7.00
  -1   3   0  226.88    6.80
  -1   3   0  235.98    6.90
  -1   3   0  213.78    5.90
   0  -3   0 1004.30   23.60
   0  -3   0  992.10   23.60
   0  -3   0  988.90   24.20
   0  -3   0 1014.00   24.00
   0  -3   0  978.80   23.80
   0  -3   0 1006.20   23.30
   0  -3   0  978.00   23.60
   0  -3   0  998.20   23.20
   0  -3   0 1000.50   22.60
   0  -3   0  996.80   23.70
   0  -3   0 1016.70   23.50
   0  -3   0 1007.80   23.90
   0  -3   0 1003.80   22.70
   0  -3   0 1010.50   24.20
   0  -3   0 1002.40   24.00
   0  -3   0  994.10   24.10
   0  -3   0  999.60   22.90
   0  -3   0  993.20   24.10
   0   3   0 1003.50   23.70
   0   3   0 1009.40   23.60
   0   3   0 1020.20   24.10
   0   3   0 1011.90   23.80
   0   3   0 1007.20   23.30
   0   3   0 1015.90   23.90
   0   3   0 1049.70   24.40
   0   3   0 1043.60   24.20
   0   3   0 1025.40   23.90
   0   3   0 1019.90   24.30
   0   3   0  975.90   24.60
   0   3   0 1026.10   24.40
   0   3   0 1027.90   23.30
   0   3   0 1031.20   24.00
   0   3   0 1055.49   24.30
   0   3   0 1006.20   24.10
   0   3   0 1028.10   24.30
   0   3   0  993.00   23.70
  -1  -3   0  794.62   19.40
  -1  -3   0  783.92   18.30
  -1  -3   0  760.52   17.90
  -1  -3   0  780.42   19.50
  -1  -3   0  784.22   19.50
  -1  -3   0  802.32   19.60
  -1  -3   0  770.12   19.60
  -1  -3   0  776.22   18.70
  -1  -3   0  791.22   19.00
  -1  -3   0  780.62   19.60
  -1  -3   0  769.12   19.40
  -1  -3   0  776.22   19.50
  -1  -3   0  830.32   19.00
  -1  -3   0  762.32   17.90
  -1  -3   0  784.22   19.10
  -1  -3   0  779.22   17.70
  -1  -3   0  756.72   19.50
   1   3   0  773.02   19.00
   1   3   0  792.22   19.20
   1   3   0  799.92   18.90
   1   3   0  762.12   18.60
   1   3   0  729.53   19.00
   1   3   0  765.22   17.50
   1   3   0  732.03   19.00
   1   3   0  748.13   19.10
   1   3   0  758.72   17.50
   1   3   0  788.92   19.00
   1   3   0  770.52   19.60
   1   3   0  765.12   18.40
   1   3   0  772.72   19.20
   1   3   0  756.12   18.60
   1   3   0  764.72   18.70
   1   3   0  758.32   18.90
   1   3   0  797.12   19.30
   1   3   0  789.82   19.00
   1   3   0  775.62   19.00
   1   3   0  783.12   18.10
   1   3   0  773.02   18.70
   1   3   0  782.82   19.30
  -2  -3   0 1240.28   29.70
  -2  -3   0 1233.18   30.50
  -2  -3   0 1146.29   30.00
  -2  -3   0 1250.87   28.90
  -2  -3   0 1258.17   27.50
  -2  -3   0 1248.48   30.00
  -2  -3   0 1241.88   28.10
  -2  -3   0 1250.17   29.60
  -2  -3   0 1252.17   29.10
  -2  -3   0 1255.47   29.60
  -2  -3   0 1230.88   30.10
  -2  -3   0 1258.97   27.50
  -2  -3   0 1266.47   29.20
  -2  -3   0 1226.68   29.90
  -2  -3   0 1255.17   30.30
   2   3   0 1294.77   30.60
   2   3   0 1256.57   28.00
   2   3   0 1274.17   30.40
   2   3   0 1201.78   29.20
   2   3   0 1237.38   29.30
   2   3   0 1264.57   28.60
   2   3   0 1268.07   30.10
   2   3   0 1285.77   29.90
   2   3   0 1262.27   30.30
   2   3   0 1265.37   30.30
   2   3   0 1273.37   28.10
   2   3   0 1308.37   28.60
   2   3   0 1267.97   30.20
   2   3   0 1232.98   30.70
   2   3   0 1243.38   30.40
   2   3   0 1249.68   29.80
   2   3   0 1270.17   30.10
   2   3   0 1233.78   30.60
   2   3   0 1288.57   28.80
   2   3   0 1261.27   30.00
   2   3   0 1241.68   30.60
   2   3   0 1273.27   28.70
   2   3   0 1291.87   30.60
   2   3   0 1282.37   29.60
  -3  -3   0  786.72   21.10
  -3  -3   0  786.52   17.40
  -3  -3   0  757.22   17.80
  -3  -3   0  772.52   19.10
  -3  -3   0  781.02   18.90
  -3  -3   0  757.92   17.30
  -3  -3   0  777.72   20.30
  -3  -3   0  752.02   18.90
  -3  -3   0  758.62   19.30
  -3  -3   0  775.52   19.70
  -3  -3   0  751.12   20.20
  -3  -3   0  754.42   20.10
  -3  -3   0  735.33   20.40
  -3  -3   0  762.62   19.40
  -3  -3   0  786.62   19.60
  -3  -3   0  780.62   18.80
  -3  -3   0  786.82   20.90
   3   3   0  756.02   19.80
   3   3   0  736.73   18.10
   3   3   0  768.82   17.40
   3   3   0  763.32   20.40
   3   3   0  745.23   18.90
   3   3   0  778.42   18.20
   3   3   0  739.13   19.90
   3   3   0  741.53   20.10
   3   3   0  735.93   20.00
   3   3   0  742.93   19.20
   3   3   0  751.12   20.00
   3   3   0  756.92   17.70
   3   3   0  769.12   19.60
   3   3   0  759.02   18.20
   3   3   0  730.93   19.80
   3   3   0  752.42   18.10
   3   3   0  763.82   20.10
   3   3   0  747.73   18.30
   3   3   0  754.22   19.80
   3   3   0  770.22   20.00
   3   3   0  752.52   19.80
   3   3   0  767.82   19.80
   3   3   0  749.33   17.40
   3   3   0  759.02   20.20
   3   3   0  758.02   20.20
   3   3   0  747.53   18.70
  -4  -3   0  139.99    6.20
  -4  -3   0  136.89    6.50
  -4  -3   0  136.09    6.00
  -4  -3   0  135.29    3.80
  -4  -3   0  131.89    4.90
  -4  -3   0  134.59    5.20
  -4  -3   0  130.49    6.00
  -4  -3   0  128.59    6.30
  -4  -3   0  135.79    4.90
  -4  -3   0  126.99    3.80
  -4  -3   0  131.69    5.00
  -4  -3   0  124.69    5.00
  -4  -3   0  128.59    6.20
  -4  -3   0  138.99    6.00
  -4  -3   0  135.29    6.70
  -4  -3   0  131.09    4.90
  -4  -3   0  129.49    5.40
  -4  -3   0  128.09    4.10
  -4  -3   0  133.99    5.20
  -4  -3   0  132.49    3.90
   4   3   0  114.69    5.60
   4   3   0  111.09    5.70
   4   3   0  126.39    5.90
   4   3   0  122.09    4.60
   4   3   0  125.59    4.90
   4   3   0  125.69    4.40
   4   3   0  132.49    4.10
   4   3   0  117.49    6.00
   4   3   0  123.19    5.50
   4   3   0  120.79    5.70
   4   3   0  127.49    5.90
   4   3   0  125.89    6.00
   4   3   0  126.99    6.00
   4   3   0  132.89    6.30
   4   3   0  124.99    3.90
   4   3   0  120.69    6.20
   4   3   0  113.59    5.90
   4   3   0  131.89    4.00
   4   3   0  114.79    4.60
   4   3   0  120.09    5.90
  -5  -3   0   51.89    4.00
  -5  -3   0   51.79    2.30
  -5  -3   0   48.00    3.00
  -5  -3   0   55.09    3.20
  -5  -3   0   54.79    4.40
  -5  -3   0   49.90    2.80
  -5  -3   0   57.39    5.40
  -5  -3   0   48.80    3.00
  -5  -3   0   48.50    3.00
  -5  -3   0   54.39    3.40
  -5  -3   0   52.49    3.80
  -5  -3   0   54.59    2.40
  -5  -3   0   54.49    2.30
  -5  -3   0   51.69    5.30
  -5  -3   0   50.89    3.20
  -5  -3   0   55.69    4.00
  -5  -3   0   53.49    2.50
  -5  -3   0   51.59    4.80
  -5  -3   0   53.09    3.80
  -5  -3   0   51.09    3.10
   5   3   0   54.59    4.30
   5   3   0   55.39    4.50
   5   3   0   54.79    3.10
   5   3   0   52.79    2.90
   5   3   0   45.30    3.10
   5   3   0   58.29    4.00
   5   3   0   51.19    3.00
   5   3   0   59.19    4.10
   5   3   0   44.30    4.80
   5   3   0   50.69    4.90
   5   3   0   56.49    4.10
   5   3   0   57.99    3.20
   5   3   0   53.19    5.10
   5   3   0   57.49    4.50
   5   3   0   52.49    2.80
   5   3   0   56.19    5.40
   5   3   0   62.39    4.50
   5   3   0   46.70    4.70
   5   3   0   56.09    3.10
  -6  -3   0   39.90    2.90
  -6  -3   0   43.90    2.90
  -6  -3   0   35.10    4.10
  -6  -3   0   35.10    2.30
  -6  -3   0   40.90    4.20
  -6  -3   0   38.80    2.80
  -6  -3   0   35.70    2.80
  -6  -3   0   37.80    4.50
  -6  -3   0   40.40    4.90
  -6  -3   0   36.60    2.80
  -6  -3   0   32.20    2.40
  -6  -3   0   37.80    4.40
  -6  -3   0   34.30    3.30
  -6  -3   0   35.60    4.60
  -6  -3   0   36.70    2.20
  -6  -3   0   42.60    3.00
  -6  -3   0   43.80    5.10
  -6  -3   0   36.70    4.10
   6   3   0   52.49    5.40
   6   3   0   47.70    5.30
   6   3   0   41.30    5.00
   6   3   0   49.20    5.20
   6   3   0   50.39    3.30
   6   3   0   44.90    5.10
   6   3   0   42.40    3.00
   6   3   0   54.79    3.60
   6   3   0   43.60    5.00
   6   3   0   45.50    2.90
   6   3   0   42.90    5.00
   6   3   0   51.39    3.30
   6   3   0   52.19    5.80
   6   3   0   52.89    4.10
   6   3   0   51.99    5.30
   6   3   0   46.90    3.00
   6   3   0   41.50    2.70
   6   3   0   53.29    5.70
   6   3   0   40.90    4.50
  -7  -3   0   17.30    3.20
  -7  -3   0   27.10    3.80
  -7  -3   0   25.20    4.10
  -7  -3   0   25.00    4.50
  -7  -3   0   24.90    3.00
  -7  -3   0   16.90    3.10
  -7  -3   0   18.40    3.60
  -7  -3   0   17.50    3.40
  -7  -3   0   19.20    3.80
   7   3   0   20.10    3.80
   7   3   0   23.30    4.10
   7   3   0   22.30    4.10
   7   3   0   24.90    4.20
   7   3   0   20.80    2.60
   7   3   0   21.00    2.80
   7   3   0   24.00    2.50
   7   3   0   20.80    3.30
   7   3   0   26.20    4.20
   7   3   0   22.40    3.90
   7   3   0   26.60    4.60
   7   3   0   23.40    3.00
   7   3   0   33.30    3.90
   7   3   0   24.90    4.60
   7   3   0   22.00    4.00
   7   3   0   23.10    4.10
   7   3   0   24.40    2.90
   7   3   0   22.00    3.90
   7   3   0   26.50    3.20
  -8  -3   0   71.09    5.30
  -8  -3   0   76.69    7.10
  -8  -3   0   69.99    7.50
  -8  -3   0   70.19    7.40
  -8  -3   0   64.39    5.10
  -8  -3   0   66.39    5.30
  -8  -3   0   56.49    6.80
  -8  -3   0   59.89    6.60
  -8  -3   0   65.19    4.00
   8   3   0   51.39    4.10
   8   3   0   63.79    7.50
   8   3   0   53.49    6.10
   8   3   0   69.69    7.40
   8   3   0   52.99    6.70
   8   3   0   61.49    5.60
   8   3   0   61.39    7.10
   8   3   0   57.69    6.70
   8   3   0   69.19    7.50
   8   3   0   61.79    7.20
   8   3   0   62.89    6.90
   8   3   0   53.59    7.00
   8   3   0   46.40    6.00
  -9  -3   0  110.49    8.10
  -9  -3   0  120.59    8.60
  -9  -3   0  122.69    9.00
  -9  -3   0  110.19    7.90
  -9  -3   0  123.69    6.00
  -9  -3   0  130.19    8.30
  -9  -3   0  149.29    9.10
   9   3   0  132.09    8.50
   9   3   0  126.89    8.90
   9   3   0  129.49    8.90
   9   3   0  123.19    8.80
   9   3   0  129.89    8.50
   9   3   0  121.99    9.00
   9   3   0  122.19    8.70
   9   3   0  136.59    8.90
   9   3   0  137.99    9.40
 -10  -3   0   61.39    7.50
 -10  -3   0   63.69    4.40
 -10  -3   0   66.79    7.50
 -10  -3   0   67.49    8.30
 -10  -3   0   68.79    7.80
 -10  -3   0   54.69    7.50
 -10  -3   0   71.59    8.60
  10   3   0   41.70    6.90
  10   3   0   61.09    7.80
  10   3   0   59.89    7.20
  10   3   0   54.39    7.70
  10   3   0   64.49    7.80
  10   3   0   52.39    7.20
  10   3   0   43.10    6.60
  10   3   0   54.79    7.70
  10   3   0   50.99    7.70
 -11  -3   0    3.40    3.30
 -11  -3   0    0.80    2.80
 -11  -3   0    7.30    3.70
 -11  -3   0    4.00    3.10
 -11  -3   0    6.50    3.50
 -11  -3   0    5.30    3.20
  11   3   0    1.10    2.70
  11   3   0    9.40    4.10
  11   3   0   14.70    5.10
  11   3   0    8.00    4.20
  11   3   0    9.40    3.80
  11   3   0    4.20    3.40
  11   3   0    1.30    3.10
  11   3   0    2.90    3.30
 -12  -3   0    6.90    3.70
 -12  -3   0    2.60    3.20
 -12  -3   0    2.10    3.10
  12   3   0    2.10    3.10
  12   3   0    1.10    3.20
  12   3   0    2.90    3.30
  12   3   0    6.90    4.00
  12   3   0    3.10    3.50
  12   3   0    2.90    3.70
  12   3   0    4.40    3.70
  12   3   0    2.70    2.90
  13  -4   0   28.30    6.10
  13  -4   0   34.10    7.00
  13  -4   0   28.10    5.70
  13  -4   0   29.50    6.00
  13  -4   0   28.50    5.70
  13  -4   0   36.40    7.60
  13  -4   0   39.60    7.30
 -13   4   0   34.10    7.00
 -13   4   0   31.70    6.90
 -13   4   0   22.80    6.40
  12  -4   0   31.10    5.90
  12  -4   0   22.80    5.20
  12  -4   0   27.10    5.40
  12  -4   0   31.40    6.60
  12  -4   0   24.70    6.00
  12  -4   0   24.30    5.90
  12  -4   0   21.10    4.90
  12  -4   0   16.70    4.50
  12  -4   0   23.10    5.20
 -12   4   0   21.00    5.30
 -12   4   0   14.80    5.30
 -12   4   0   18.10    4.90
 -12   4   0   16.50    4.70
 -12   4   0   13.10    5.20
 -12   4   0   17.20    3.00
  11  -4   0    0.20    2.60
  11  -4   0    1.10    2.40
  11  -4   0    4.80    3.10
  11  -4   0   -1.10    2.00
  11  -4   0    0.40    2.60
  11  -4   0    3.10    2.70
  11  -4   0    3.50    2.90
  11  -4   0    1.10    2.30
  11  -4   0    0.00    2.70
 -11   4   0    0.90    3.10
 -11   4   0    0.90    1.40
 -11   4   0    0.50    2.90
 -11   4   0    2.80    3.10
 -11   4   0    2.70    2.40
 -11   4   0    3.60    3.00
  10  -4   0   10.50    3.30
  10  -4   0   12.70    4.10
  10  -4   0   14.90    3.90
  10  -4   0   15.60    4.50
  10  -4   0   11.10    3.20
  10  -4   0   11.30    3.80
  10  -4   0   10.40    4.10
  10  -4   0    7.60    3.10
  10  -4   0   13.10    3.60
  10  -4   0   11.10    3.60
  10  -4   0   10.90    3.50
 -10   4   0   11.50    4.30
 -10   4   0    4.10    2.80
 -10   4   0   13.10    4.20
 -10   4   0   12.70    3.60
 -10   4   0   15.00    2.70
 -10   4   0   12.00    3.70
   9  -4   0   33.60    5.70
   9  -4   0   36.30    5.50
   9  -4   0   37.40    5.10
   9  -4   0   32.20    5.00
   9  -4   0   29.60    5.40
   9  -4   0   35.30    5.30
   9  -4   0   28.60    4.50
   9  -4   0   35.00    4.90
   9  -4   0   31.20    5.10
   9  -4   0   31.00    4.90
   9  -4   0   23.90    4.70
   9  -4   0   38.80    5.50
  -9   4   0   37.40    6.20
  -9   4   0   33.40    5.40
  -9   4   0   29.30    5.30
  -9   4   0   32.30    5.80
  -9   4   0   33.60    5.00
  -9   4   0   33.80    3.90
   8  -4   0   26.90    4.50
   8  -4   0   19.70    4.10
   8  -4   0   26.00    2.70
   8  -4   0   23.00    4.10
   8  -4   0   15.60    3.60
   8  -4   0   18.40    3.60
   8  -4   0   26.90    4.00
   8  -4   0   21.30    4.00
   8  -4   0   29.60    4.90
   8  -4   0   19.40    3.60
   8  -4   0   19.30    3.90
   8  -4   0   22.80    4.30
   8  -4   0   15.60    3.50
  -8   4   0   24.10    4.10
  -8   4   0   31.40    5.40
  -8   4   0   19.60    4.70
  -8   4   0   24.90    4.60
  -8   4   0   17.60    3.70
  -8   4   0   23.50    3.20
  -8   4   0   23.00    4.30
   7  -4   0   10.60    2.90
   7  -4   0   12.70    2.00
   7  -4   0   13.80    2.40
   7  -4   0   12.60    3.20
   7  -4   0   11.80    3.10
   7  -4   0   12.30    2.90
   7  -4   0   20.30    3.70
   7  -4   0   14.40    2.60
   7  -4   0   12.10    2.90
   7  -4   0   11.50    2.90
   7  -4   0   14.60    3.00
   7  -4   0   12.90    3.00
   7  -4   0   18.60    2.80
   7  -4   0    9.40    2.70
   7  -4   0   13.90    3.00
   7  -4   0   14.10    2.90
  -7   4   0   17.70    2.50
  -7   4   0   28.10    3.30
  -7   4   0   19.20    3.90
  -7   4   0   19.10    3.80
  -7   4   0   19.60    3.60
  -7   4   0   21.00    3.50
  -7   4   0   20.80    3.60
  -7   4   0   26.10    3.10
  -7   4   0   22.40    3.10
   6  -4   0   69.69    4.00
   6  -4   0   74.99    4.90
   6  -4   0   71.49    5.20
   6  -4   0   78.29    5.40
   6  -4   0   79.29    4.10
   6  -4   0   72.49    4.90
   6  -4   0   68.09    5.10
   6  -4   0   73.89    5.00
   6  -4   0   64.89    4.60
   6  -4   0   68.79    4.00
   6  -4   0   74.79    4.80
   6  -4   0   70.59    4.60
   6  -4   0   64.89    4.80
   6  -4   0   58.69    4.70
   6  -4   0   66.39    4.90
   6  -4   0   67.59    3.70
   6  -4   0   73.09    4.30
  -6   4   0   72.79    5.40
  -6   4   0   78.39    4.10
  -6   4   0   79.89    5.40
  -6   4   0   72.79    4.20
  -6   4   0   79.99    4.90
  -6   4   0   81.19    4.60
  -6   4   0   67.79    5.00
  -6   4   0   78.69    3.80
  -6   4   0   76.89    5.60
  -6   4   0   81.29    4.70
  -6   4   0   76.19    3.90
  -6   4   0   75.89    4.40
   5  -4   0  818.22   22.10
   5  -4   0  816.62   21.30
   5  -4   0  814.02   20.60
   5  -4   0  807.42   22.40
   5  -4   0  817.42   19.30
   5  -4   0  803.22   22.20
   5  -4   0  810.22   22.00
   5  -4   0  809.82   20.70
   5  -4   0  779.92   22.40
   5  -4   0  817.22   21.60
   5  -4   0  803.12   22.30
   5  -4   0  824.12   23.00
   5  -4   0  795.32   19.20
   5  -4   0  767.52   22.80
   5  -4   0  807.32   19.20
   5  -4   0  795.52   22.20
   5  -4   0  789.02   22.90
   5  -4   0  800.12   20.60
   5  -4   0  810.72   22.40
   5  -4   0  813.02   20.70
   5  -4   0  833.12   21.90
   5  -4   0  817.32   22.60
  -5   4   0  809.62   23.80
  -5   4   0  840.32   22.50
  -5   4   0  849.02   22.10
  -5   4   0  836.22   21.80
  -5   4   0  840.52   20.90
  -5   4   0  823.62   20.40
  -5   4   0  860.61   20.70
  -5   4   0  824.82   22.30
  -5   4   0  823.82   22.10
  -5   4   0  851.41   23.30
  -5   4   0  845.82   23.40
  -5   4   0  840.62   23.80
   4  -4   0  830.42   22.70
   4  -4   0  886.71   23.10
   4  -4   0  867.11   23.00
   4  -4   0  846.42   21.30
   4  -4   0  871.41   21.30
   4  -4   0  856.61   22.80
   4  -4   0  864.81   22.70
   4  -4   0  894.81   21.70
   4  -4   0  870.01   23.40
   4  -4   0  847.52   23.00
   4  -4   0  862.91   22.50
   4  -4   0  871.41   20.00
   4  -4   0  849.52   21.60
   4  -4   0  852.51   22.40
   4  -4   0  888.91   21.60
   4  -4   0  872.21   23.20
   4  -4   0  871.11   22.80
   4  -4   0  903.91   22.10
   4  -4   0  882.81   21.50
   4  -4   0  862.51   22.50
   4  -4   0  865.81   21.40
   4  -4   0  865.51   20.90
   4  -4   0  870.31   22.90
  -4   4   0  899.81   24.10
  -4   4   0  942.61   24.10
  -4   4   0  897.01   24.50
  -4   4   0  914.91   21.30
  -4   4   0  905.71   23.30
  -4   4   0  861.01   21.60
  -4   4   0  888.21   23.50
  -4   4   0  913.51   23.40
  -4   4   0  934.21   21.50
  -4   4   0  869.51   23.20
  -4   4   0  919.91   23.10
  -4   4   0  914.61   21.30
  -4   4   0  893.91   24.40
   3  -4   0   25.20    1.60
   3  -4   0   26.40    2.60
   3  -4   0   24.00    2.70
   3  -4   0   27.40    2.40
   3  -4   0   25.50    1.80
   3  -4   0   24.10    2.70
   3  -4   0   30.10    3.00
   3  -4   0   26.80    2.90
   3  -4   0   29.60    3.00
   3  -4   0   25.40    2.70
   3  -4   0   25.00    2.80
   3  -4   0   30.70    3.20
   3  -4   0   34.50    3.30
   3  -4   0   24.20    2.60
   3  -4   0   22.80    2.60
   3  -4   0   24.00    2.70
   3  -4   0   25.40    2.70
   3  -4   0   28.70    2.50
   3  -4   0   28.80    2.60
   3  -4   0   26.30    2.10
   3  -4   0   29.70    3.20
   3  -4   0   25.80    1.80
   3  -4   0   27.10    2.20
  -3   4   0   34.00    2.60
  -3   4   0   34.80    1.60
  -3   4   0   37.30    3.50
  -3   4   0   36.20    3.40
  -3   4   0   36.90    3.80
  -3   4   0   35.70    2.80
  -3   4   0   36.60    3.50
  -3   4   0   29.80    2.00
  -3   4   0   32.20    1.70
  -3   4   0   34.50    1.80
  -3   4   0   31.10    2.40
  -3   4   0   35.10    3.40
   2  -4   0    7.90    1.30
   2  -4   0    9.90    1.70
   2  -4   0    9.50    1.50
   2  -4   0   10.60    1.70
   2  -4   0   14.00    2.00
   2  -4   0    6.20    1.40
   2  -4   0   12.50    1.70
   2  -4   0    8.50    1.60
   2  -4   0    9.90    1.50
   2  -4   0   10.40    1.10
   2  -4   0    8.80    1.50
   2  -4   0    8.60    1.70
   2  -4   0    8.70    1.70
   2  -4   0    7.40    1.40
   2  -4   0    9.80    1.60
   2  -4   0    9.20    1.70
   2  -4   0    8.90    1.70
   2  -4   0    7.00    1.40
   2  -4   0   10.00    1.00
   2  -4   0    6.40    1.50
   2  -4   0   11.50    1.90
   2  -4   0    7.10    1.40
   2  -4   0   12.70    1.90
   2  -4   0    7.30    1.60
  -2   4   0   13.70    1.30
  -2   4   0   14.50    2.20
  -2   4   0   12.60    1.90
  -2   4   0   15.30    2.10
  -2   4   0   12.50    1.00
  -2   4   0   13.60    1.10
  -2   4   0   13.60    2.00
  -2   4   0   12.80    1.70
  -2   4   0   12.60    1.10
  -2   4   0   14.30    2.20
  -2   4   0   11.70    1.80
  -2   4   0   13.30    1.90
  -2   4   0   13.50    1.80
  -2   4   0   17.20    2.40
   1  -4   0   19.70    1.50
   1  -4   0   19.80    2.00
   1  -4   0   19.60    2.10
   1  -4   0   15.80    1.90
   1  -4   0   19.00    2.20
   1  -4   0   17.00    2.00
   1  -4   0   18.50    1.70
   1  -4   0   24.50    2.60
   1  -4   0   20.00    2.20
   1  -4   0   23.00    2.30
   1  -4   0   26.10    2.80
   1  -4   0   18.80    2.40
   1  -4   0   18.10    1.80
   1  -4   0   24.30    2.80
   1  -4   0   20.50    2.10
   1  -4   0   18.10    2.10
   1  -4   0   20.60    2.20
   1  -4   0   21.40    2.30
   1  -4   0   18.50    1.50
   1  -4   0   18.80    2.10
   1  -4   0   19.80    2.20
  -1   4   0   16.30    2.20
  -1   4   0   22.00    2.30
  -1   4   0   16.10    1.80
  -1   4   0   16.20    1.30
  -1   4   0   17.30    2.00
  -1   4   0   18.10    2.10
  -1   4   0   20.50    2.30
  -1   4   0   19.10    2.20
  -1   4   0   15.60    1.90
  -1   4   0   18.90    2.20
  -1   4   0   18.90    2.20
  -1   4   0   20.90    2.40
   0  -4   0  171.38    5.80
   0  -4   0  163.58    4.50
   0  -4   0  166.38    4.60
   0  -4   0  157.88    5.60
   0  -4   0  152.68    5.70
   0  -4   0  162.88    6.20
   0  -4   0  165.98    5.60
   0  -4   0  158.68    5.90
   0  -4   0  162.48    5.20
   0  -4   0  162.18    5.50
   0  -4   0  177.18    6.20
   0  -4   0  162.88    5.80
   0  -4   0  162.58    6.00
   0  -4   0  155.48    5.20
   0  -4   0  163.88    4.90
   0  -4   0  156.78    5.60
   0  -4   0  160.48    5.80
   0  -4   0  157.68    6.10
   0  -4   0  167.88    6.10
   0   4   0  174.78    5.60
   0   4   0  166.58    6.00
   0   4   0  167.08    6.40
   0   4   0  176.58    6.10
   0   4   0  179.48    6.20
   0   4   0  180.38    5.90
   0   4   0  177.48    6.20
   0   4   0  159.28    6.20
   0   4   0  177.38    5.20
   0   4   0  169.88    5.40
   0   4   0  179.88    5.10
   0   4   0  184.48    6.10
   0   4   0  181.48    5.70
   0   4   0  183.38    6.30
   0   4   0  173.28    5.80
   0   4   0  176.58    5.60
   0   4   0  173.68    5.80
   0   4   0  170.48    5.90
   0   4   0  187.88    6.20
  -1  -4   0  135.89    5.60
  -1  -4   0  141.09    5.60
  -1  -4   0  151.48    4.40
  -1  -4   0  143.39    5.30
  -1  -4   0  151.98    5.40
  -1  -4   0  144.79    5.70
  -1  -4   0  147.49    4.70
  -1  -4   0  143.09    4.00
  -1  -4   0  143.69    5.80
  -1  -4   0  140.69    4.30
  -1  -4   0  143.89    5.70
  -1  -4   0  137.29    5.00
  -1  -4   0  139.39    5.70
  -1  -4   0  142.29    5.60
  -1  -4   0  145.79    5.20
  -1  -4   0  134.09    5.50
   1   4   0  122.49    4.90
   1   4   0  129.59    5.30
   1   4   0  127.99    5.60
   1   4   0  125.29    4.70
   1   4   0  119.99    5.00
   1   4   0  125.49    4.80
   1   4   0  125.99    3.70
   1   4   0  126.09    4.30
   1   4   0  124.49    4.50
   1   4   0  116.99    4.80
   1   4   0  125.49    5.00
   1   4   0  134.99    4.90
   1   4   0  128.69    5.00
   1   4   0  135.29    5.10
   1   4   0  125.29    5.10
   1   4   0  126.69    3.70
   1   4   0  121.89    4.70
   1   4   0  132.59    4.90
   1   4   0  127.29    5.20
   1   4   0  136.69    5.00
   1   4   0  128.79    5.00
   1   4   0  129.49    5.20
  -2  -4   0  115.39    5.20
  -2  -4   0  115.49    3.20
  -2  -4   0  114.19    4.40
  -2  -4   0  115.79    5.10
  -2  -4   0  119.19    4.60
  -2  -4   0  117.19    5.30
  -2  -4   0  111.39    3.20
  -2  -4   0  118.79    5.00
  -2  -4   0  114.49    4.70
  -2  -4   0  115.89    5.30
  -2  -4   0  121.39    5.50
  -2  -4   0  112.29    5.10
  -2  -4   0  119.29    4.70
  -2  -4   0  109.19    5.10
  -2  -4   0  118.59    5.40
  -2  -4   0  117.59    3.80
   2   4   0   95.39    4.20
   2   4   0  100.39    4.50
   2   4   0   95.89    4.10
   2   4   0   99.99    3.00
   2   4   0   92.59    4.40
   2   4   0   98.29    3.20
   2   4   0  101.39    4.70
   2   4   0   93.79    3.90
   2   4   0   96.19    4.50
   2   4   0   95.69    3.00
   2   4   0   92.29    4.50
   2   4   0   88.89    4.50
   2   4   0   97.99    3.40
   2   4   0   93.49    4.00
   2   4   0   98.19    4.70
   2   4   0   94.99    4.30
   2   4   0   91.09    4.40
   2   4   0   95.19    4.70
   2   4   0   95.89    3.10
   2   4   0   93.89    4.50
   2   4   0   95.39    4.70
   2   4   0  103.89    4.80
   2   4   0   95.29    4.90
  -3  -4   0  711.13   20.40
  -3  -4   0  719.83   19.60
  -3  -4   0  726.03   20.00
  -3  -4   0  729.23   20.00
  -3  -4   0  740.43   18.60
  -3  -4   0  725.43   19.10
  -3  -4   0  721.83   19.10
  -3  -4   0  712.53   18.30
  -3  -4   0  715.13   18.10
  -3  -4   0  721.73   19.40
  -3  -4   0  704.43   20.20
  -3  -4   0  737.73   18.60
  -3  -4   0  723.13   17.00
  -3  -4   0  715.43   19.70
  -3  -4   0  702.63   19.20
   3   4   0  678.13   16.50
   3   4   0  666.83   17.80
   3   4   0  700.03   16.10
   3   4   0  688.73   19.20
   3   4   0  685.43   17.80
   3   4   0  667.93   19.20
   3   4   0  700.13   17.20
   3   4   0  693.93   18.60
   3   4   0  679.23   19.10
   3   4   0  680.63   16.60
   3   4   0  715.93   19.00
   3   4   0  684.43   15.80
   3   4   0  697.23   17.30
   3   4   0  682.13   18.90
   3   4   0  704.43   18.20
   3   4   0  698.93   16.60
   3   4   0  682.23   18.30
   3   4   0  633.54   19.00
   3   4   0  682.73   19.00
   3   4   0  667.43   18.80
   3   4   0  695.23   19.20
   3   4   0  647.74   18.40
   3   4   0  679.13   18.80
   3   4   0  696.83   18.80
   3   4   0  699.03   18.90
  -4  -4   0  802.02   22.60
  -4  -4   0  807.62   18.50
  -4  -4   0  788.02   22.00
  -4  -4   0  787.72   20.20
  -4  -4   0  776.02   19.80
  -4  -4   0  812.32   20.30
  -4  -4   0  767.62   22.80
  -4  -4   0  828.82   22.50
  -4  -4   0  778.22   20.70
  -4  -4   0  824.62   20.20
  -4  -4   0  796.82   22.00
  -4  -4   0  773.72   20.80
  -4  -4   0  805.72   22.00
  -4  -4   0  770.52   20.90
  -4  -4   0  778.32   21.60
  -4  -4   0  783.02   22.50
  -4  -4   0  769.32   21.10
   4   4   0  812.92   19.10
   4   4   0  810.72   22.10
   4   4   0  774.22   22.20
   4   4   0  784.42   21.60
   4   4   0  786.32   21.80
   4   4   0  799.92   21.10
   4   4   0  795.72   22.70
   4   4   0  810.72   22.60
   4   4   0  818.62   22.60
   4   4   0  812.02   22.40
   4   4   0  805.22   22.20
   4   4   0  802.22   22.40
   4   4   0  795.42   19.50
   4   4   0  821.92   20.50
   4   4   0  774.42   22.10
   4   4   0  804.02   20.70
   4   4   0  803.52   22.00
   4   4   0  781.32   19.60
   4   4   0  793.62   21.90
   4   4   0  775.52   19.40
  -5  -4   0   79.09    4.00
  -5  -4   0   74.89    4.30
  -5  -4   0   74.59    3.90
  -5  -4   0   71.39    4.70
  -5  -4   0   76.49    4.50
  -5  -4   0   73.39    4.20
  -5  -4   0   83.79    5.50
  -5  -4   0   82.19    2.90
  -5  -4   0   74.89    5.40
  -5  -4   0   79.49    4.10
  -5  -4   0   81.09    5.20
  -5  -4   0   73.69    4.90
  -5  -4   0   78.79    3.90
  -5  -4   0   70.19    4.20
  -5  -4   0   68.79    4.90
  -5  -4   0   73.19    5.30
  -5  -4   0   84.09    5.80
   5   4   0   71.09    5.10
   5   4   0   68.39    4.70
   5   4   0   67.09    5.00
   5   4   0   69.29    5.10
   5   4   0   76.99    5.10
   5   4   0   62.89    4.80
   5   4   0   70.19    3.60
   5   4   0   69.19    4.50
   5   4   0   65.79    2.60
   5   4   0   67.59    4.80
   5   4   0   63.59    4.80
   5   4   0   68.79    5.00
   5   4   0   69.39    3.90
   5   4   0   68.29    5.20
   5   4   0   69.09    2.60
   5   4   0   76.69    4.90
   5   4   0   65.59    4.90
   5   4   0   71.19    3.30
   5   4   0   67.69    3.70
   5   4   0   71.59    2.90
  -6  -4   0   20.90    3.80
  -6  -4   0   23.40    4.20
  -6  -4   0   20.90    2.80
  -6  -4   0   29.50    3.60
  -6  -4   0   18.90    2.80
  -6  -4   0   22.80    3.00
  -6  -4   0   18.40    4.00
  -6  -4   0   18.20    2.40
  -6  -4   0   17.60    3.10
  -6  -4   0   17.50    3.50
  -6  -4   0   16.30    3.10
  -6  -4   0   20.90    3.80
  -6  -4   0   20.30    3.50
   6   4   0   19.00    3.80
   6   4   0   19.20    3.30
   6   4   0   17.60    2.90
   6   4   0   23.60    4.10
   6   4   0   26.10    3.10
   6   4   0   30.40    4.50
   6   4   0   24.50    4.00
   6   4   0   24.00    3.90
   6   4   0   19.90    3.30
   6   4   0   19.00    3.50
   6   4   0   25.90    3.10
   6   4   0   26.60    4.30
   6   4   0   20.10    3.70
   6   4   0   20.70    2.50
   6   4   0   19.60    3.60
   6   4   0   26.10    4.30
  -7  -4   0   12.50    3.00
  -7  -4   0   14.10    3.40
  -7  -4   0   13.50    3.70
  -7  -4   0   13.90    3.20
  -7  -4   0   23.20    3.60
  -7  -4   0   12.40    3.10
  -7  -4   0   17.00    2.70
  -7  -4   0   18.20    3.80
  -7  -4   0   21.30    3.70
  -7  -4   0   16.60    3.30
   7   4   0   12.80    3.40
   7   4   0   21.70    2.80
   7   4   0   17.20    3.70
   7   4   0   18.90    4.10
   7   4   0    9.60    3.10
   7   4   0   21.00    3.00
   7   4   0   14.70    3.50
   7   4   0   20.70    4.10
   7   4   0   17.40    3.50
   7   4   0   15.90    3.70
   7   4   0   19.00    3.90
   7   4   0   11.40    3.20
   7   4   0   15.80    3.60
   7   4   0   16.70    3.40
  -8  -4   0   75.49    6.80
  -8  -4   0   54.79    6.50
  -8  -4   0   63.79    7.50
  -8  -4   0   37.90    5.80
  -8  -4   0   51.29    5.70
  -8  -4   0   44.50    5.80
  -8  -4   0   55.19    4.10
  -8  -4   0   61.89    6.70
  -8  -4   0   54.09    5.90
   8   4   0   56.49    6.80
   8   4   0   53.09    6.60
   8   4   0   53.79    7.00
   8   4   0   50.29    6.40
   8   4   0   40.00    5.70
   8   4   0   53.09    3.60
   8   4   0   50.99    6.50
   8   4   0   39.60    5.10
   8   4   0   52.59    6.30
   8   4   0   45.20    6.10
   8   4   0   56.69    7.20
   8   4   0   59.69    7.20
   8   4   0   56.29    7.20
  -9  -4   0   61.49    9.70
  -9  -4   0   45.70    6.60
  -9  -4   0   33.90    5.20
  -9  -4   0   47.00    6.60
  -9  -4   0   47.90    6.20
  -9  -4   0   50.09    7.20
  -9  -4   0   49.10    4.00
   9   4   0   40.20    6.30
   9   4   0   38.30    5.90
   9   4   0   60.99    7.80
   9   4   0   51.79    7.50
   9   4   0   48.40    6.90
   9   4   0   42.50    6.40
   9   4   0   36.60    6.00
   9   4   0   56.29    7.10
 -10  -4   0   68.89    8.90
 -10  -4   0   58.39    7.70
 -10  -4   0   65.09    8.20
 -10  -4   0   67.69    8.10
 -10  -4   0   76.49    8.40
 -10  -4   0   72.89    5.00
 -10  -4   0   68.69    8.30
  10   4   0   57.09    7.80
  10   4   0   59.99    8.20
  10   4   0   59.99    8.10
  10   4   0   68.09    8.00
  10   4   0   67.99    8.40
  10   4   0   55.99    7.80
  10   4   0   64.89    8.10
  10   4   0   68.39    8.40
 -11  -4   0   21.90    3.70
 -11  -4   0   20.30    5.50
 -11  -4   0   21.60    5.50
 -11  -4   0   33.00    6.00
 -11  -4   0   18.70    5.00
 -11  -4   0   25.50    5.40
 -11  -4   0   23.10    5.40
  11   4   0   19.90    5.40
  11   4   0   12.70    4.60
  11   4   0   23.30    5.20
  11   4   0   17.30    5.60
  11   4   0   19.30    5.50
  11   4   0   14.80    4.60
  11   4   0   16.00    4.90
  11   4   0   27.00    6.00
 -12  -4   0   26.80    5.90
 -12  -4   0   15.10    4.80
 -12  -4   0   15.50    5.10
 -12  -4   0    9.00    4.20
  12   4   0   23.30    6.10
  12   4   0   25.20    6.90
  12   4   0   25.50    6.60
  12   4   0   39.80    7.70
  12   4   0   25.40    5.80
  12   4   0   19.60    5.50
  12   4   0   24.10    6.20
  12   4   0   28.40    6.70
  12  -5   0   35.60    6.20
  12  -5   0   28.40    5.70
  12  -5   0   30.60    6.00
  12  -5   0   40.90    6.70
  12  -5   0   37.60    6.40
  12  -5   0   30.60    6.40
  12  -5   0   27.80    6.30
  12  -5   0   47.90    7.20
  12  -5   0   37.70    6.80
 -12   5   0   33.20    6.80
 -12   5   0   47.50    7.60
 -12   5   0   38.80    4.50
 -12   5   0   45.30    6.90
 -12   5   0   36.30    7.00
  11  -5   0   52.29    7.40
  11  -5   0   59.49    8.50
  11  -5   0   57.29    7.40
  11  -5   0   67.19    8.10
  11  -5   0   44.70    6.50
  11  -5   0   60.49    8.10
  11  -5   0   59.99    8.50
  11  -5   0   58.79    7.80
  11  -5   0   50.59    6.90
 -11   5   0   57.19    7.90
 -11   5   0   48.90    7.80
 -11   5   0   54.59    7.60
 -11   5   0   73.59    9.50
 -11   5   0   64.99    7.60
 -11   5   0   55.39    5.30
  10  -5   0   79.69    8.80
  10  -5   0   88.19    8.80
  10  -5   0   87.99    7.30
  10  -5   0   98.99    7.60
  10  -5   0   81.69    8.50
  10  -5   0  106.29    7.40
  10  -5   0   92.69    9.30
  10  -5   0  103.29   10.30
  10  -5   0   79.09    9.10
  10  -5   0   87.89    8.70
 -10   5   0  102.09   10.00
 -10   5   0   84.39    9.30
 -10   5   0  103.69    7.50
 -10   5   0  105.89    8.10
 -10   5   0  116.09   11.50
 -10   5   0   93.99    5.80
   9  -5   0  109.89    7.30
   9  -5   0  109.49    7.70
   9  -5   0   97.69    7.60
   9  -5   0  110.69    7.60
   9  -5   0  115.99    5.20
   9  -5   0  109.89    7.50
   9  -5   0  122.29    7.90
   9  -5   0  112.59    8.00
   9  -5   0  100.59    7.90
   9  -5   0  114.49    7.40
   9  -5   0  115.49    7.80
   9  -5   0  116.39    8.50
  -9   5   0  144.19    9.40
  -9   5   0  126.89    6.60
  -9   5   0  128.99    9.20
  -9   5   0  134.09    8.10
  -9   5   0  143.79    9.00
  -9   5   0  132.09    8.80
   8  -5   0    6.20    2.60
   8  -5   0    8.20    2.80
   8  -5   0    3.70    2.50
   8  -5   0    5.70    1.70
   8  -5   0   10.40    3.10
   8  -5   0    7.80    3.00
   8  -5   0    6.60    2.80
   8  -5   0    7.10    2.70
   8  -5   0    8.80    2.80
   8  -5   0    3.00    2.30
   8  -5   0    5.90    2.50
   8  -5   0    6.90    2.50
  -8   5   0    4.40    2.30
  -8   5   0    7.50    3.20
  -8   5   0    3.00    1.60
  -8   5   0    4.90    2.50
  -8   5   0    3.50    2.00
  -8   5   0    6.10    2.70
   7  -5   0   46.80    5.50
   7  -5   0   44.50    5.90
   7  -5   0   45.50    5.30
   7  -5   0   38.80    5.00
   7  -5   0   43.40    5.30
   7  -5   0   51.79    5.50
   7  -5   0   37.70    4.90
   7  -5   0   43.70    5.60
   7  -5   0   36.00    4.50
   7  -5   0   40.50    5.10
   7  -5   0   40.10    3.10
   7  -5   0   41.40    5.20
  -7   5   0   46.00    5.50
  -7   5   0   45.80    5.50
  -7   5   0   40.70    4.70
  -7   5   0   41.50    5.20
  -7   5   0   41.30    5.40
  -7   5   0   40.30    4.10
  -7   5   0   52.39    6.50
  -7   5   0   40.60    5.10
   6  -5   0   33.00    3.40
   6  -5   0   29.80    4.30
   6  -5   0   30.40    3.30
   6  -5   0   30.40    4.00
   6  -5   0   24.70    3.40
   6  -5   0   25.30    4.10
   6  -5   0   32.80    3.40
   6  -5   0   35.80    4.50
   6  -5   0   28.30    4.10
   6  -5   0   34.50    4.40
   6  -5   0   33.60    4.30
   6  -5   0   26.00    3.70
   6  -5   0   29.60    4.20
   6  -5   0   25.50    3.70
   6  -5   0   30.10    3.90
   6  -5   0   26.30    3.90
   6  -5   0   32.20    3.40
  -6   5   0   26.80    2.80
  -6   5   0   30.20    2.30
  -6   5   0   36.40    4.10
  -6   5   0   37.40    4.50
  -6   5   0   28.10    4.10
  -6   5   0   32.70    2.30
  -6   5   0   31.80    4.50
  -6   5   0   23.10    3.10
  -6   5   0   30.60    4.00
  -6   5   0   26.30    3.60
  -6   5   0   24.90    4.10
   5  -5   0   22.40    3.20
   5  -5   0   24.00    3.60
   5  -5   0   23.10    3.20
   5  -5   0   23.70    3.60
   5  -5   0   19.60    3.30
   5  -5   0   27.90    3.00
   5  -5   0   17.30    2.90
   5  -5   0   21.30    2.70
   5  -5   0   23.00    3.20
   5  -5   0   20.10    3.10
   5  -5   0   19.40    2.50
   5  -5   0   23.20    3.10
   5  -5   0   24.10    3.50
   5  -5   0   28.60    3.60
   5  -5   0   23.50    2.50
   5  -5   0   26.40    2.50
   5  -5   0   21.50    2.60
   5  -5   0   27.30    3.00
   5  -5   0   23.70    2.40
   5  -5   0   20.40    3.20
   5  -5   0   20.90    2.90
   5  -5   0   27.20    2.80
  -5   5   0   21.80    1.60
  -5   5   0   21.10    2.90
  -5   5   0   22.70    2.30
  -5   5   0   25.70    3.40
  -5   5   0   16.60    3.00
  -5   5   0   21.40    2.80
  -5   5   0   23.40    3.50
  -5   5   0   20.50    2.10
  -5   5   0   24.10    3.70
  -5   5   0   25.00    3.60
  -5   5   0   22.30    2.00
  -5   5   0   20.90    3.60
   4  -5   0   51.79    2.90
   4  -5   0   51.99    2.90
   4  -5   0   53.99    3.40
   4  -5   0   47.00    3.60
   4  -5   0   41.10    3.30
   4  -5   0   48.90    2.30
   4  -5   0   50.59    3.20
   4  -5   0   46.50    3.40
   4  -5   0   46.50    3.70
   4  -5   0   54.69    4.00
   4  -5   0   52.59    3.60
   4  -5   0   41.20    2.80
   4  -5   0   53.59    4.00
   4  -5   0   49.20    3.70
   4  -5   0   47.20    3.50
   4  -5   0   52.39    2.90
   4  -5   0   49.70    3.60
   4  -5   0   50.39    3.20
   4  -5   0   51.79    3.60
   4  -5   0   46.30    3.10
   4  -5   0   49.20    3.70
   4  -5   0   46.10    3.10
   4  -5   0   47.50    4.30
  -4   5   0   48.30    2.40
  -4   5   0   49.10    2.20
  -4   5   0   46.50    3.60
  -4   5   0   44.90    3.20
  -4   5   0   48.10    2.70
  -4   5   0   46.30    4.60
  -4   5   0   44.60    4.50
  -4   5   0   46.70    3.40
  -4   5   0   45.60    3.60
  -4   5   0   46.00    3.70
  -4   5   0   44.00    4.40
  -4   5   0   52.19    2.30
   3  -5   0  646.94   16.90
   3  -5   0  649.24   17.90
   3  -5   0  656.33   18.00
   3  -5   0  643.54   17.20
   3  -5   0  639.24   17.90
   3  -5   0  629.44   17.20
   3  -5   0  627.04   17.40
   3  -5   0  634.54   17.00
   3  -5   0  621.14   17.30
   3  -5   0  612.24   17.60
   3  -5   0  654.23   17.80
   3  -5   0  653.03   16.20
   3  -5   0  653.33   17.90
   3  -5   0  650.33   18.00
   3  -5   0  656.63   17.10
   3  -5   0  652.13   14.90
   3  -5   0  634.84   18.00
   3  -5   0  628.84   15.00
   3  -5   0  638.94   17.40
   3  -5   0  646.24   17.40
   3  -5   0  647.54   17.50
  -3   5   0  582.04   17.10
  -3   5   0  603.74   17.00
  -3   5   0  606.24   17.10
  -3   5   0  604.04   17.00
  -3   5   0  611.84   16.70
  -3   5   0  596.34   16.80
  -3   5   0  585.54   15.70
  -3   5   0  605.04   17.10
  -3   5   0  594.44   14.40
  -3   5   0  603.44   14.20
  -3   5   0  587.94   17.20
  -3   5   0  607.24   14.80
  -3   5   0  590.24   16.30
  -3   5   0  596.24   14.50
   2  -5   0  699.93   18.70
   2  -5   0  712.33   18.50
   2  -5   0  710.53   18.60
   2  -5   0  705.83   17.80
   2  -5   0  696.93   18.40
   2  -5   0  663.43   18.50
   2  -5   0  693.73   18.10
   2  -5   0  676.53   16.60
   2  -5   0  699.23   18.30
   2  -5   0  689.63   18.70
   2  -5   0  657.53   18.70
   2  -5   0  704.73   17.90
   2  -5   0  686.13   18.00
   2  -5   0  659.03   18.40
   2  -5   0  711.53   16.60
   2  -5   0  683.93   18.60
   2  -5   0  693.23   17.70
   2  -5   0  693.43   17.70
   2  -5   0  683.73   18.70
   2  -5   0  695.33   18.60
   2  -5   0  688.63   18.30
  -2   5   0  658.83   15.90
  -2   5   0  655.53   18.00
  -2   5   0  635.14   17.60
  -2   5   0  658.13   17.80
  -2   5   0  643.34   17.60
  -2   5   0  650.23   18.20
  -2   5   0  646.24   17.30
  -2   5   0  652.73   17.70
  -2   5   0  649.04   17.80
  -2   5   0  687.23   18.10
  -2   5   0  654.93   17.40
   1  -5   0   23.00    2.90
   1  -5   0   30.70    3.30
   1  -5   0   20.30    2.50
   1  -5   0   26.70    2.10
   1  -5   0   26.50    2.80
   1  -5   0   28.80    2.90
   1  -5   0   25.30    2.40
   1  -5   0   25.30    1.80
   1  -5   0   29.10    3.10
   1  -5   0   27.60    2.80
   1  -5   0   23.40    2.60
   1  -5   0   19.20    2.30
   1  -5   0   26.80    2.80
   1  -5   0   26.80    2.70
   1  -5   0   22.90    2.70
   1  -5   0   24.80    2.20
   1  -5   0   26.30    1.80
   1  -5   0   27.20    2.70
   1  -5   0   23.80    2.60
   1  -5   0   26.20    2.80
   1  -5   0   24.40    2.60
  -1   5   0   29.50    1.90
  -1   5   0   32.80    3.20
  -1   5   0   36.60    3.50
  -1   5   0   30.80    2.10
  -1   5   0   29.70    3.00
  -1   5   0   32.30    3.40
  -1   5   0   29.10    3.00
  -1   5   0   28.90    2.30
  -1   5   0   27.70    2.70
  -1   5   0   27.80    2.10
  -1   5   0   32.10    3.20
  -1   5   0   39.70    3.60
  -1   5   0   36.90    3.60
  -1   5   0   25.10    1.90
  -1   5   0   24.40    2.80
   0  -5   0  624.54   16.30
   0  -5   0  636.44   17.50
   0  -5   0  658.33   18.10
   0  -5   0  664.83   18.00
   0  -5   0  641.24   17.70
   0  -5   0  658.43   17.20
   0  -5   0  652.53   17.10
   0  -5   0  643.74   17.50
   0  -5   0  629.54   16.80
   0  -5   0  651.33   17.10
   0  -5   0  615.54   16.30
   0  -5   0  645.64   17.30
   0  -5   0  644.44   15.90
   0  -5   0  662.43   15.30
   0  -5   0  650.83   17.40
   0  -5   0  637.64   15.40
   0  -5   0  646.54   17.40
   0  -5   0  663.53   16.90
   0  -5   0  642.34   17.70
   0   5   0  654.63   16.70
   0   5   0  636.14   16.70
   0   5   0  681.33   17.60
   0   5   0  671.43   16.10
   0   5   0  664.03   16.00
   0   5   0  663.73   16.50
   0   5   0  660.83   17.40
   0   5   0  655.93   18.00
   0   5   0  642.04   17.50
   0   5   0  649.74   17.60
   0   5   0  651.23   17.10
   0   5   0  675.53   17.80
   0   5   0  669.83   17.50
   0   5   0  663.63   17.10
   0   5   0  628.14   18.10
   0   5   0  664.53   17.60
   0   5   0  637.94   16.70
   0   5   0  629.74   17.60
  -1  -5   0   52.29    2.70
  -1  -5   0   43.50    2.30
  -1  -5   0   49.60    3.40
  -1  -5   0   43.40    3.10
  -1  -5   0   45.00    3.40
  -1  -5   0   47.30    2.00
  -1  -5   0   47.40    3.30
  -1  -5   0   48.80    3.10
  -1  -5   0   52.19    3.00
  -1  -5   0   48.10    3.50
  -1  -5   0   41.80    3.20
  -1  -5   0   53.69    3.30
  -1  -5   0   54.79    3.70
  -1  -5   0   49.30    2.40
  -1  -5   0   48.60    3.30
  -1  -5   0   46.90    3.00
  -1  -5   0   43.00    3.10
   1   5   0   51.59    3.40
   1   5   0   53.99    3.40
   1   5   0   55.59    3.30
   1   5   0   53.99    3.40
   1   5   0   50.89    2.10
   1   5   0   57.19    3.20
   1   5   0   51.29    3.70
   1   5   0   53.99    3.20
   1   5   0   46.20    3.00
   1   5   0   50.99    3.20
   1   5   0   50.29    3.10
   1   5   0   48.70    2.10
   1   5   0   48.10    3.00
   1   5   0   53.39    3.50
   1   5   0   46.90    3.00
   1   5   0   51.79    2.90
   1   5   0   55.69    3.40
   1   5   0   48.10    2.70
   1   5   0   49.70    3.40
   1   5   0   47.90    3.10
   1   5   0   52.09    3.10
   1   5   0   49.80    3.30
  -2  -5   0  109.59    5.50
  -2  -5   0  107.79    5.50
  -2  -5   0  105.99    3.30
  -2  -5   0  102.29    5.40
  -2  -5   0  113.69    4.60
  -2  -5   0  108.19    5.50
  -2  -5   0  109.09    5.20
  -2  -5   0  103.69    5.30
  -2  -5   0  109.09    3.40
  -2  -5   0  105.29    5.30
  -2  -5   0  104.69    4.80
  -2  -5   0  104.59    5.30
  -2  -5   0  114.09    5.70
  -2  -5   0  102.39    4.70
  -2  -5   0  111.99    4.00
  -2  -5   0  114.89    5.00
   2   5   0  111.09    5.20
   2   5   0  107.49    4.60
   2   5   0   92.19    5.00
   2   5   0   97.69    5.10
   2   5   0  109.89    4.90
   2   5   0   96.09    4.70
   2   5   0  109.09    5.10
   2   5   0  104.89    5.30
   2   5   0  119.99    5.50
   2   5   0  113.89    4.80
   2   5   0  104.69    4.60
   2   5   0  107.69    3.50
   2   5   0  107.59    5.70
   2   5   0  109.79    4.00
   2   5   0  110.79    5.10
   2   5   0  105.29    5.30
   2   5   0   98.19    5.20
   2   5   0  110.79    3.30
   2   5   0  108.79    3.50
   2   5   0  108.29    5.20
   2   5   0  107.29    5.20
  -3  -5   0   45.50    3.40
  -3  -5   0   37.00    4.00
  -3  -5   0   41.30    4.20
  -3  -5   0   41.30    4.50
  -3  -5   0   41.80    4.10
  -3  -5   0   49.60    3.70
  -3  -5   0   50.49    3.70
  -3  -5   0   43.60    2.10
  -3  -5   0   44.40    3.00
  -3  -5   0   42.80    3.00
  -3  -5   0   45.80    4.70
  -3  -5   0   39.70    2.70
  -3  -5   0   47.80    3.70
  -3  -5   0   53.79    5.10
   3   5   0   38.80    3.10
   3   5   0   37.00    4.00
   3   5   0   38.80    2.90
   3   5   0   39.70    2.70
   3   5   0   41.20    3.20
   3   5   0   42.90    2.00
   3   5   0   43.70    3.50
   3   5   0   47.70    4.60
   3   5   0   39.70    3.20
   3   5   0   41.20    2.00
   3   5   0   40.20    4.10
   3   5   0   43.50    3.50
   3   5   0   45.80    4.50
   3   5   0   36.30    4.00
   3   5   0   38.60    2.80
   3   5   0   34.80    3.80
   3   5   0   43.70    3.40
   3   5   0   39.00    3.00
   3   5   0   49.20    4.90
   3   5   0   36.90    2.00
   3   5   0   43.80    3.50
   3   5   0   39.80    2.70
   3   5   0   43.60    3.40
   3   5   0   40.80    2.10
  -4  -5   0  444.66   12.60
  -4  -5   0  427.46   10.40
  -4  -5   0  416.46   13.30
  -4  -5   0  414.86   13.50
  -4  -5   0  426.96   12.10
  -4  -5   0  393.26   14.30
  -4  -5   0  458.85   14.80
  -4  -5   0  415.66   13.90
  -4  -5   0  408.36   13.10
  -4  -5   0  420.16   14.90
  -4  -5   0  401.66   14.30
  -4  -5   0  420.36   14.30
  -4  -5   0  406.26   13.70
  -4  -5   0  421.16   14.00
  -4  -5   0  440.56   13.30
  -4  -5   0  407.46   12.20
   4   5   0  384.46   13.30
   4   5   0  415.76   13.90
   4   5   0  388.46   12.20
   4   5   0  440.96   14.30
   4   5   0  391.46   13.40
   4   5   0  384.36   13.60
   4   5   0  395.56   13.70
   4   5   0  369.66   13.10
   4   5   0  386.46   11.20
   4   5   0  382.46   13.10
   4   5   0  394.76   10.50
   4   5   0  392.96   13.20
   4   5   0  388.36   13.40
   4   5   0  411.86   13.10
   4   5   0  388.46   13.70
   4   5   0  395.26    9.50
   4   5   0  398.06   11.30
   4   5   0  389.56   12.20
   4   5   0  397.16   13.10
   4   5   0  387.66    9.60
   4   5   0  380.86   12.00
   4   5   0  396.66   13.30
   4   5   0  380.86   12.60
  -5  -5   0  194.08    9.60
  -5  -5   0  228.88   10.50
  -5  -5   0  210.48    8.60
  -5  -5   0  233.98    9.40
  -5  -5   0  215.78    9.80
  -5  -5   0  200.38    8.20
  -5  -5   0  211.48    8.70
  -5  -5   0  215.78    7.90
  -5  -5   0  222.58    7.60
  -5  -5   0  212.08    9.90
  -5  -5   0  227.38    8.70
  -5  -5   0  221.38    7.80
  -5  -5   0  224.18    9.60
  -5  -5   0  208.18    9.40
  -5  -5   0  211.08    9.30
   5   5   0  219.88    9.80
   5   5   0  204.28    9.60
   5   5   0  231.98    9.60
   5   5   0  205.98    6.70
   5   5   0  208.88    6.90
   5   5   0  209.78    9.60
   5   5   0  189.48    9.20
   5   5   0  200.48    9.30
   5   5   0  209.68    6.70
   5   5   0  197.38    9.30
   5   5   0  222.38    9.60
   5   5   0  218.08    8.10
   5   5   0  221.48    9.40
   5   5   0  202.68    8.80
   5   5   0  210.18    9.40
   5   5   0  199.68    9.40
   5   5   0  209.68    8.50
  -6  -5   0   37.90    5.30
  -6  -5   0   42.70    4.50
  -6  -5   0   47.00    5.70
  -6  -5   0   46.40    3.70
  -6  -5   0   47.40    5.00
  -6  -5   0   54.49    5.50
  -6  -5   0   49.50    5.70
  -6  -5   0   46.20    4.70
  -6  -5   0   46.10    4.60
  -6  -5   0   47.00    4.60
  -6  -5   0   58.09    6.30
  -6  -5   0   46.40    5.70
  -6  -5   0   49.40    5.50
   6   5   0   49.90    5.70
   6   5   0   56.29    6.20
   6   5   0   70.79    7.00
   6   5   0   62.09    5.70
   6   5   0   68.79    7.10
   6   5   0   62.79    4.10
   6   5   0   50.89    5.60
   6   5   0   62.99    6.40
   6   5   0   50.99    5.80
   6   5   0   65.19    6.50
   6   5   0   64.19    6.90
   6   5   0   65.79    6.90
   6   5   0   57.19    6.20
  -7  -5   0  118.69    8.10
  -7  -5   0  122.69    8.60
  -7  -5   0  116.39    7.80
  -7  -5   0  124.99    7.20
  -7  -5   0  115.99    7.30
  -7  -5   0  142.49    6.70
  -7  -5   0  137.09    8.10
  -7  -5   0  121.59    6.60
  -7  -5   0  129.49    7.70
  -7  -5   0  116.99    8.00
   7   5   0  128.79    6.10
   7   5   0  132.59    8.40
   7   5   0  133.79    8.00
   7   5   0  140.99    8.50
   7   5   0  128.09    8.20
   7   5   0  128.59    8.30
   7   5   0  131.89    8.00
   7   5   0  134.59    7.60
   7   5   0  131.69    8.60
   7   5   0  114.89    8.00
   7   5   0  131.39    8.50
   7   5   0  117.09    7.80
   7   5   0  133.29    7.80
  -8  -5   0   18.50    3.20
  -8  -5   0    8.70    3.10
  -8  -5   0   15.50    3.70
  -8  -5   0   14.10    3.50
  -8  -5   0    8.70    3.50
  -8  -5   0   11.60    3.30
  -8  -5   0   12.30    3.80
  -8  -5   0   17.90    4.20
  -8  -5   0   13.80    4.00
   8   5   0   15.80    4.00
   8   5   0   17.00    4.40
   8   5   0   21.50    4.40
   8   5   0   20.10    4.40
   8   5   0   18.40    4.60
   8   5   0   16.80    2.80
   8   5   0   18.90    4.00
   8   5   0   13.90    3.50
   8   5   0   11.80    3.70
   8   5   0   15.30    4.00
   8   5   0   11.80    3.80
  -9  -5   0   27.80    5.50
  -9  -5   0   23.30    5.10
  -9  -5   0   16.30    3.90
  -9  -5   0   24.50    4.90
  -9  -5   0   30.30    4.20
  -9  -5   0   29.20    4.80
  -9  -5   0   25.30    5.40
  -9  -5   0   21.20    4.70
  -9  -5   0   22.50    4.40
   9   5   0   23.20    4.70
   9   5   0   21.60    4.70
   9   5   0   18.80    4.70
   9   5   0   10.50    4.00
   9   5   0   18.20    4.70
   9   5   0   29.50    5.60
   9   5   0   25.80    5.10
   9   5   0   21.20    4.80
   9   5   0   23.30    4.90
 -10  -5   0    3.30    2.90
 -10  -5   0    3.80    3.10
 -10  -5   0    1.90    2.80
 -10  -5   0    3.60    3.30
 -10  -5   0    3.50    3.30
 -10  -5   0    3.80    2.00
 -10  -5   0    9.80    3.60
  10   5   0    6.30    3.60
  10   5   0    9.60    4.00
  10   5   0    5.90    3.60
  10   5   0    1.10    2.80
  10   5   0    8.10    3.80
  10   5   0    2.40    2.90
  10   5   0    4.00    3.50
  10   5   0    6.00    3.40
 -11  -5   0    1.70    2.00
 -11  -5   0    2.30    2.90
 -11  -5   0   -0.90    2.60
 -11  -5   0    2.50    3.00
 -11  -5   0    2.40    3.20
 -11  -5   0   -0.70    2.80
  11   5   0    2.80    3.30
  11   5   0    0.30    3.60
  11   5   0   -0.20    3.10
  11   5   0    4.10    3.50
  11   5   0    1.20    3.40
  11   5   0    1.50    3.00
  11   5   0    1.20    3.10
  12  -6   0   13.00    4.50
  12  -6   0    8.50    3.70
  12  -6   0    8.50    3.80
  12  -6   0    3.60    2.80
  12  -6   0    4.60    3.20
  12  -6   0    9.60    3.80
  12  -6   0    8.80    4.10
 -12   6   0   10.50    4.20
 -12   6   0    8.90    4.00
 -12   6   0    4.30    3.70
 -12   6   0    4.10    2.20
  11  -6   0   19.80    4.70
  11  -6   0   26.40    5.70
  11  -6   0   36.00    6.30
  11  -6   0   21.30    5.30
  11  -6   0   18.30    4.60
  11  -6   0   29.60    5.90
  11  -6   0   25.40    5.10
 -11   6   0   27.50    5.50
 -11   6   0   30.70    4.40
 -11   6   0   22.70    4.80
 -11   6   0   21.40    5.10
 -11   6   0   24.10    6.10
 -11   6   0   21.90    5.60
  10  -6   0    1.20    2.30
  10  -6   0   -1.20    1.90
  10  -6   0    0.60    2.00
  10  -6   0    0.10    1.20
  10  -6   0   -0.90    2.10
  10  -6   0    2.50    2.50
  10  -6   0    0.80    2.50
  10  -6   0    3.50    3.00
  10  -6   0    1.50    2.30
 -10   6   0    1.40    1.80
 -10   6   0    0.60    2.70
 -10   6   0    2.30    2.50
 -10   6   0    2.40    2.70
 -10   6   0    1.70    2.20
 -10   6   0    2.30    2.50
   9  -6   0   65.89    7.10
   9  -6   0   69.69    7.80
   9  -6   0   69.29    7.60
   9  -6   0   63.19    7.40
   9  -6   0   59.79    7.70
   9  -6   0   52.89    6.50
   9  -6   0   65.99    7.00
   9  -6   0   79.89    8.20
   9  -6   0   53.39    3.90
   9  -6   0   52.39    6.60
  -9   6   0   50.79    6.70
  -9   6   0   63.19    7.10
  -9   6   0   59.79    8.10
  -9   6   0   71.19    7.30
  -9   6   0   62.09    4.80
  -9   6   0   60.99    7.70
   8  -6   0   58.19    6.40
   8  -6   0   48.80    6.20
   8  -6   0   55.59    6.30
   8  -6   0   62.29    6.80
   8  -6   0   58.99    6.60
   8  -6   0   71.29    6.90
   8  -6   0   43.60    5.90
   8  -6   0   48.80    3.70
   8  -6   0   65.29    7.10
   8  -6   0   52.69    6.60
  -8   6   0   44.50    6.20
  -8   6   0   53.39    7.20
  -8   6   0   48.30    6.20
  -8   6   0   42.80    5.90
  -8   6   0   49.30    4.90
  -8   6   0   38.60    5.20
   7  -6   0  121.69    7.40
   7  -6   0  106.59    6.80
   7  -6   0  116.79    7.30
   7  -6   0   98.19    6.60
   7  -6   0  106.59    5.60
   7  -6   0  116.69    7.20
   7  -6   0  117.69    7.50
   7  -6   0  117.49    7.10
   7  -6   0  117.89    6.90
   7  -6   0  110.89    7.00
  -7   6   0   96.99    5.70
  -7   6   0  101.29    7.20
  -7   6   0   92.99    6.00
  -7   6   0   99.69    6.70
  -7   6   0   93.89    6.20
  -7   6   0   89.69    6.50
  -7   6   0  106.89    6.40
  -7   6   0   84.29    6.60
   6  -6   0  266.67   11.20
   6  -6   0  267.77   10.70
   6  -6   0  257.37    9.10
   6  -6   0  252.17   10.10
   6  -6   0  241.78    8.00
   6  -6   0  253.17   10.90
   6  -6   0  255.37    8.20
   6  -6   0  260.97    9.30
   6  -6   0  255.67   10.60
   6  -6   0  256.47    9.20
   6  -6   0  255.17   10.80
   6  -6   0  269.07   11.00
   6  -6   0  259.47   10.60
   6  -6   0  263.67   10.70
   6  -6   0  258.87   10.60
   6  -6   0  251.87    9.30
   6  -6   0  265.27   10.50
  -6   6   0  264.47   10.50
  -6   6   0  252.57    9.60
  -6   6   0  243.38    9.70
  -6   6   0  250.97   10.10
  -6   6   0  239.18   10.90
  -6   6   0  242.08   10.80
  -6   6   0  235.78   10.30
  -6   6   0  234.38   10.50
   5  -6   0  140.69    7.00
   5  -6   0  125.69    5.70
   5  -6   0  144.09    7.30
   5  -6   0  144.29    7.10
   5  -6   0  149.69    6.30
   5  -6   0  134.69    5.70
   5  -6   0  144.29    7.40
   5  -6   0  134.79    7.00
   5  -6   0  135.09    5.60
   5  -6   0  144.69    5.70
   5  -6   0  136.59    6.80
   5  -6   0  144.49    6.90
   5  -6   0  151.98    7.10
   5  -6   0  136.29    6.30
   5  -6   0  142.59    6.90
   5  -6   0  134.39    6.80
   5  -6   0  136.49    5.80
   5  -6   0  148.59    7.30
   5  -6   0  142.29    6.20
   5  -6   0  134.89    5.90
   5  -6   0  130.19    6.90
  -5   6   0  150.28    6.90
  -5   6   0  165.08    7.10
  -5   6   0  149.99    7.50
  -5   6   0  151.58    7.60
  -5   6   0  152.78    7.90
  -5   6   0  155.28    7.90
  -5   6   0  153.58    7.60
  -5   6   0  150.38    7.30
   4  -6   0   19.90    3.20
   4  -6   0   20.70    3.10
   4  -6   0   15.20    2.80
   4  -6   0   21.20    2.20
   4  -6   0   19.30    2.50
   4  -6   0   17.40    2.80
   4  -6   0   15.10    2.60
   4  -6   0   18.80    2.60
   4  -6   0   20.50    3.30
   4  -6   0   14.80    2.50
   4  -6   0   20.00    3.20
   4  -6   0   19.20    2.70
   4  -6   0   15.30    2.10
   4  -6   0   16.50    2.40
   4  -6   0   13.80    2.50
   4  -6   0   21.60    2.50
   4  -6   0   21.20    3.00
   4  -6   0   22.60    3.40
   4  -6   0   16.70    2.60
   4  -6   0   21.60    3.20
   4  -6   0   14.30    2.70
   4  -6   0   13.80    2.60
  -4   6   0   17.30    1.50
  -4   6   0   17.90    2.70
  -4   6   0   17.70    1.60
  -4   6   0   19.40    1.60
  -4   6   0   19.30    2.90
  -4   6   0   14.40    2.90
  -4   6   0   22.70    3.60
  -4   6   0   20.20    2.00
  -4   6   0   14.30    2.70
  -4   6   0   16.00    3.00
  -4   6   0   20.30    3.20
  -4   6   0   19.40    3.10
   3  -6   0   31.70    3.80
   3  -6   0   30.40    3.40
   3  -6   0   28.50    3.20
   3  -6   0   25.00    2.60
   3  -6   0   26.80    1.60
   3  -6   0   27.60    3.00
   3  -6   0   24.80    3.30
   3  -6   0   26.90    3.10
   3  -6   0   28.10    3.00
   3  -6   0   30.00    3.20
   3  -6   0   25.60    3.00
   3  -6   0   21.80    3.00
   3  -6   0   24.80    3.00
   3  -6   0   30.00    3.30
   3  -6   0   30.40    3.30
   3  -6   0   28.50    3.20
   3  -6   0   23.80    2.80
   3  -6   0   26.30    1.60
   3  -6   0   22.00    3.00
   3  -6   0   37.30    3.90
   3  -6   0   27.60    3.30
  -3   6   0   29.10    3.40
  -3   6   0   26.90    3.00
  -3   6   0   29.90    3.60
  -3   6   0   22.90    2.90
  -3   6   0   25.50    3.00
  -3   6   0   28.70    3.50
  -3   6   0   27.40    1.80
  -3   6   0   27.00    3.60
  -3   6   0   25.00    3.10
  -3   6   0   25.80    3.20
  -3   6   0   31.20    3.60
   2  -6   0   33.80    3.40
   2  -6   0   34.20    3.20
   2  -6   0   42.20    4.40
   2  -6   0   27.90    3.20
   2  -6   0   37.20    4.00
   2  -6   0   31.20    3.50
   2  -6   0   28.10    3.20
   2  -6   0   31.70    3.60
   2  -6   0   23.70    3.10
   2  -6   0   32.00    2.40
   2  -6   0   34.00    3.80
   2  -6   0   30.30    2.00
   2  -6   0   40.60    3.80
   2  -6   0   33.50    3.80
   2  -6   0   27.70    3.60
   2  -6   0   33.70    3.40
   2  -6   0   28.10    2.00
   2  -6   0   28.20    3.20
   2  -6   0   34.10    3.20
   2  -6   0   34.50    3.70
  -2   6   0   26.20    2.90
  -2   6   0   28.50    3.30
  -2   6   0   25.70    3.20
  -2   6   0   32.50    3.70
  -2   6   0   23.80    2.90
  -2   6   0   28.50    3.40
  -2   6   0   23.90    3.10
  -2   6   0   40.30    3.90
  -2   6   0   24.10    1.80
  -2   6   0   23.50    2.70
  -2   6   0   23.20    2.90
  -2   6   0   27.10    3.00
  -2   6   0   24.30    3.10
  -2   6   0   19.50    3.00
   1  -6   0  126.99    5.70
   1  -6   0  116.89    5.40
   1  -6   0  124.19    5.50
   1  -6   0  110.89    4.30
   1  -6   0  116.89    4.40
   1  -6   0  115.39    5.60
   1  -6   0  121.09    6.10
   1  -6   0  121.79    5.60
   1  -6   0  120.89    6.00
   1  -6   0  119.19    4.90
   1  -6   0  132.19    5.70
   1  -6   0  118.79    5.70
   1  -6   0  115.79    5.10
   1  -6   0  124.89    5.70
   1  -6   0  120.99    5.40
   1  -6   0  113.89    5.70
   1  -6   0  112.79    5.10
   1  -6   0  118.29    5.40
   1  -6   0  121.39    4.80
   1  -6   0  119.99    4.90
   1  -6   0  116.39    5.60
  -1   6   0  145.19    6.50
  -1   6   0  146.19    6.00
  -1   6   0  143.79    5.30
  -1   6   0  145.29    6.60
  -1   6   0  147.89    6.30
  -1   6   0  145.29    6.40
  -1   6   0  142.69    6.10
  -1   6   0  146.29    6.40
  -1   6   0  138.09    5.10
  -1   6   0  142.59    6.50
  -1   6   0  138.89    5.30
  -1   6   0  150.48    6.10
  -1   6   0  144.29    6.30
  -1   6   0  140.89    5.30
  -1   6   0  141.59    5.90
   0  -6   0  189.18    7.20
   0  -6   0  181.88    7.60
   0  -6   0  183.98    6.10
   0  -6   0  198.98    7.30
   0  -6   0  192.48    8.10
   0  -6   0  194.58    7.60
   0  -6   0  191.08    7.80
   0  -6   0  181.48    7.30
   0  -6   0  181.58    6.50
   0  -6   0  200.48    5.50
   0  -6   0  191.18    7.50
   0  -6   0  203.48    8.00
   0  -6   0  187.38    6.50
   0  -6   0  199.88    7.20
   0  -6   0  204.28    7.40
   0  -6   0  188.28    7.50
   0  -6   0  182.38    7.80
   0   6   0  212.28    8.30
   0   6   0  219.58    8.10
   0   6   0  215.58    7.90
   0   6   0  216.78    8.10
   0   6   0  220.88    6.60
   0   6   0  221.18    8.00
   0   6   0  215.18    7.90
   0   6   0  215.08    6.40
   0   6   0  206.28    8.00
   0   6   0  210.58    7.20
   0   6   0  216.28    7.20
   0   6   0  208.38    7.50
   0   6   0  206.08    8.50
   0   6   0  208.88    7.90
   0   6   0  210.68    7.20
   0   6   0  207.98    7.60
   0   6   0  202.28    7.80
  -1  -6   0  141.99    5.80
  -1  -6   0  139.89    6.20
  -1  -6   0  130.99    5.90
  -1  -6   0  130.29    4.70
  -1  -6   0  135.49    5.30
  -1  -6   0  142.79    6.70
  -1  -6   0  122.99    5.90
  -1  -6   0  129.29    6.50
  -1  -6   0  131.69    4.80
  -1  -6   0  134.79    4.20
  -1  -6   0  131.89    6.40
  -1  -6   0  133.09    6.30
  -1  -6   0  132.79    6.20
  -1  -6   0  131.19    6.40
  -1  -6   0  135.89    6.30
  -1  -6   0  126.89    6.10
  -1  -6   0  140.09    5.70
   1   6   0  114.19    5.10
   1   6   0  110.69    5.40
   1   6   0  107.29    5.00
   1   6   0  115.69    3.90
   1   6   0  116.79    5.10
   1   6   0  105.19    5.20
   1   6   0  112.49    5.60
   1   6   0  118.49    5.50
   1   6   0  109.89    5.10
   1   6   0  110.89    5.60
   1   6   0  115.39    5.30
   1   6   0  113.19    5.80
   1   6   0  104.59    5.60
   1   6   0  113.89    5.30
   1   6   0  107.19    5.20
   1   6   0  109.69    3.80
   1   6   0  108.29    5.90
   1   6   0  115.79    5.50
   1   6   0  112.19    4.80
   1   6   0  117.39    5.30
   1   6   0  117.59    5.60
  -2  -6   0   38.20    4.20
  -2  -6   0   41.20    3.20
  -2  -6   0   41.50    3.80
  -2  -6   0   44.90    4.40
  -2  -6   0   32.00    3.50
  -2  -6   0   38.00    3.00
  -2  -6   0   40.70    4.20
  -2  -6   0   42.70    3.00
  -2  -6   0   41.00    4.30
  -2  -6   0   43.80    4.50
  -2  -6   0   40.40    4.40
  -2  -6   0   46.80    4.60
  -2  -6   0   42.20    2.50
  -2  -6   0   36.50    4.20
  -2  -6   0   43.20    4.50
   2   6   0   31.80    1.60
   2   6   0   32.60    2.30
   2   6   0   26.40    3.40
   2   6   0   32.70    1.80
   2   6   0   34.50    3.60
   2   6   0   29.20    3.60
   2   6   0   35.40    4.40
   2   6   0   30.60    3.60
   2   6   0   31.00    3.30
   2   6   0   30.80    3.70
   2   6   0   33.60    3.50
   2   6   0   36.20    3.40
   2   6   0   34.40    2.80
   2   6   0   37.20    3.60
   2   6   0   30.30    3.60
   2   6   0   32.20    1.80
   2   6   0   31.70    3.70
   2   6   0   38.20    4.20
   2   6   0   39.90    4.10
   2   6   0   36.40    3.70
   2   6   0   34.50    3.90
   2   6   0   28.10    3.40
  -3  -6   0  370.66   12.40
  -3  -6   0  357.26   12.90
  -3  -6   0  348.47   12.10
  -3  -6   0  341.87    9.40
  -3  -6   0  351.26   12.20
  -3  -6   0  345.87   10.60
  -3  -6   0  346.47   11.20
  -3  -6   0  344.17   12.00
  -3  -6   0  318.47   12.10
  -3  -6   0  349.17   12.50
  -3  -6   0  353.26   12.30
  -3  -6   0  353.76   12.80
  -3  -6   0  355.56   11.00
  -3  -6   0  319.27   12.30
   3   6   0  353.66   12.20
   3   6   0  374.56   12.60
   3   6   0  340.07   11.80
   3   6   0  354.96   10.80
   3   6   0  368.16   12.60
   3   6   0  357.26   12.40
   3   6   0  358.06   11.80
   3   6   0  351.86    9.10
   3   6   0  345.57   11.90
   3   6   0  352.36   12.50
   3   6   0  363.36   11.50
   3   6   0  351.16   12.00
   3   6   0  332.37   12.20
   3   6   0  345.37    9.40
   3   6   0  355.96   11.80
   3   6   0  335.87   10.80
   3   6   0  359.26   12.40
   3   6   0  342.37   10.70
   3   6   0  348.47   12.90
   3   6   0  331.07   12.20
   3   6   0  357.56    9.20
   3   6   0  339.07   12.00
   3   6   0  356.06    9.20
  -4  -6   0   81.79    5.80
  -4  -6   0   75.69    5.50
  -4  -6   0   79.09    5.60
  -4  -6   0   78.89    5.00
  -4  -6   0   75.39    5.10
  -4  -6   0   72.09    5.40
  -4  -6   0   76.19    4.90
  -4  -6   0   76.39    5.20
  -4  -6   0   62.49    4.90
  -4  -6   0   72.69    4.00
  -4  -6   0   78.29    4.40
  -4  -6   0   70.69    5.00
  -4  -6   0   69.89    4.30
  -4  -6   0   69.59    5.10
  -4  -6   0   74.49    5.40
   4   6   0   69.99    5.30
   4   6   0   70.89    5.30
   4   6   0   71.79    4.90
   4   6   0   79.29    5.30
   4   6   0   73.49    5.20
   4   6   0   77.59    4.10
   4   6   0   79.49    5.40
   4   6   0   76.09    5.10
   4   6   0   74.89    5.60
   4   6   0   74.89    4.70
   4   6   0   77.39    5.30
   4   6   0   73.09    4.00
   4   6   0   73.49    4.80
   4   6   0   77.59    5.40
   4   6   0   81.99    4.50
   4   6   0   71.19    5.30
   4   6   0   72.29    5.30
   4   6   0   71.89    5.10
   4   6   0   64.99    4.70
  -5  -6   0   11.00    2.80
  -5  -6   0    8.80    2.90
  -5  -6   0   13.50    3.00
  -5  -6   0   15.90    3.10
  -5  -6   0   14.60    3.60
  -5  -6   0   17.60    3.20
  -5  -6   0   20.00    2.80
  -5  -6   0   19.10    3.90
  -5  -6   0   15.60    3.10
  -5  -6   0   15.60    3.20
  -5  -6   0   14.90    2.60
  -5  -6   0   16.00    3.50
  -5  -6   0   12.70    3.10
  -5  -6   0   16.70    2.60
   5   6   0   10.90    2.50
   5   6   0   12.60    2.60
   5   6   0    6.50    2.40
   5   6   0   13.10    3.30
   5   6   0   12.40    2.00
   5   6   0    9.00    2.80
   5   6   0   12.30    3.10
   5   6   0   11.70    3.10
   5   6   0   10.00    2.90
   5   6   0    9.60    2.70
   5   6   0   10.60    2.70
   5   6   0   14.60    3.00
   5   6   0   10.70    3.00
   5   6   0   11.00    1.90
   5   6   0    9.40    2.90
   5   6   0    8.00    3.00
   5   6   0   23.10    3.90
  -6  -6   0    7.90    2.20
  -6  -6   0    9.80    2.90
  -6  -6   0    6.80    2.50
  -6  -6   0   14.60    3.80
  -6  -6   0   12.10    3.20
  -6  -6   0    7.10    2.30
  -6  -6   0    3.60    2.10
  -6  -6   0    8.90    2.90
  -6  -6   0   10.90    2.70
  -6  -6   0    9.40    2.50
  -6  -6   0    7.00    2.70
  -6  -6   0   12.00    3.00
   6   6   0    5.90    2.70
   6   6   0    9.70    3.00
   6   6   0    7.50    2.90
   6   6   0   10.00    3.00
   6   6   0    7.80    2.70
   6   6   0    8.10    2.70
   6   6   0    7.20    2.30
   6   6   0   12.00    3.20
   6   6   0    3.80    2.20
   6   6   0   11.10    3.20
   6   6   0   11.40    2.50
   6   6   0    9.50    2.80
   6   6   0    9.50    2.80
   6   6   0    8.40    2.80
  -7  -6   0   68.79    7.10
  -7  -6   0   80.59    7.30
  -7  -6   0   68.79    5.10
  -7  -6   0   76.99    5.50
  -7  -6   0   56.79    7.00
  -7  -6   0   81.69    8.30
  -7  -6   0   76.49    7.60
  -7  -6   0   79.19    6.20
  -7  -6   0   78.49    8.20
  -7  -6   0   76.39    7.70
   7   6   0   63.49    7.60
   7   6   0   64.49    7.60
   7   6   0   59.69    6.90
   7   6   0   65.09    7.50
   7   6   0   82.29    7.80
   7   6   0   70.29    7.80
   7   6   0   64.29    4.70
   7   6   0   68.99    7.60
   7   6   0   68.59    7.10
   7   6   0   71.79    7.70
   7   6   0   72.99    5.60
   7   6   0   80.69    8.00
   7   6   0   63.09    7.50
  -8  -6   0   58.39    7.50
  -8  -6   0   47.30    5.30
  -8  -6   0   56.69    6.90
  -8  -6   0   48.10    6.70
  -8  -6   0   39.10    5.70
  -8  -6   0   43.60    6.70
  -8  -6   0   50.99    6.00
  -8  -6   0   56.69    6.70
  -8  -6   0   55.69    6.50
   8   6   0   51.69    6.40
   8   6   0   43.50    4.50
   8   6   0   46.00    6.60
   8   6   0   46.80    6.40
   8   6   0   59.69    7.50
   8   6   0   38.90    6.30
   8   6   0   31.00    5.70
   8   6   0   36.90    6.20
   8   6   0   51.79    6.10
   8   6   0   37.10    6.00
   8   6   0   49.30    7.20
  -9  -6   0   77.59    8.00
  -9  -6   0   83.89    9.10
  -9  -6   0   91.29   10.50
  -9  -6   0   67.49    8.40
  -9  -6   0   75.59    8.30
  -9  -6   0   75.49    8.50
  -9  -6   0   67.69    5.40
  -9  -6   0  101.09    7.30
  -9  -6   0   94.29    9.00
   9   6   0   60.89    8.20
   9   6   0   76.59    5.00
   9   6   0   75.39    9.20
   9   6   0   73.09    8.50
   9   6   0   60.69    7.90
   9   6   0   90.59    9.50
   9   6   0   71.29    8.20
   9   6   0   80.39    9.20
   9   6   0   77.49    8.10
   9   6   0   74.99    9.10
 -10  -6   0  108.09   11.00
 -10  -6   0  100.09   10.10
 -10  -6   0  113.49    7.00
 -10  -6   0   89.99    9.70
 -10  -6   0  107.49   11.00
 -10  -6   0  114.69   11.90
  10   6   0   91.49   10.40
  10   6   0   90.99   10.40
  10   6   0  111.99   11.50
  10   6   0   99.19   10.50
  10   6   0  105.99   11.00
  10   6   0   87.29   10.10
 -11  -6   0   30.30    6.40
 -11  -6   0   22.10    5.60
 -11  -6   0   23.30    5.80
 -11  -6   0   31.00    4.50
 -11  -6   0   28.90    5.70
  11   6   0   36.60    7.10
  11   6   0   38.70    7.30
  11   6   0   25.00    5.90
  11   6   0   47.10    8.20
  11   6   0   40.90    7.70
  11   6   0   43.80    7.90
  12  -7   0   16.70    4.90
  12  -7   0   23.50    5.90
  12  -7   0   17.40    4.80
  12  -7   0   14.10    4.40
  12  -7   0   25.60    5.80
  12  -7   0   18.40    5.00
  12  -7   0   21.60    5.50
 -12   7   0   16.50    5.20
 -12   7   0   16.00    5.00
 -12   7   0   19.60    5.30
 -12   7   0    9.80    2.90
  11  -7   0    9.40    3.80
  11  -7   0    4.90    3.40
  11  -7   0   11.10    4.20
  11  -7   0   13.10    4.60
  11  -7   0   12.30    3.80
  11  -7   0    8.50    3.70
  11  -7   0    8.10    3.70
  11  -7   0   15.10    4.60
 -11   7   0   19.80    5.00
 -11   7   0   19.00    4.70
 -11   7   0   18.80    5.10
 -11   7   0   22.20    5.70
 -11   7   0   10.80    3.10
  10  -7   0   10.70    4.00
  10  -7   0    7.50    3.30
  10  -7   0   17.60    4.80
  10  -7   0   10.90    3.70
  10  -7   0    9.10    3.60
  10  -7   0    9.60    3.50
  10  -7   0   10.40    3.90
  10  -7   0   12.60    2.60
  10  -7   0    6.20    3.00
 -10   7   0    7.40    3.30
 -10   7   0   13.70    4.40
 -10   7   0   15.30    3.30
 -10   7   0    6.10    2.80
 -10   7   0    7.70    3.60
 -10   7   0   13.00    4.30
   9  -7   0    9.20    3.20
   9  -7   0    2.40    2.80
   9  -7   0    3.90    2.60
   9  -7   0    3.30    2.70
   9  -7   0    3.70    2.60
   9  -7   0    5.80    2.00
   9  -7   0    9.90    3.50
   9  -7   0    5.50    2.80
   9  -7   0    6.70    2.90
   9  -7   0    1.50    2.50
  -9   7   0    3.90    1.90
  -9   7   0    8.00    3.10
  -9   7   0    8.00    3.30
  -9   7   0    4.90    3.10
  -9   7   0    5.80    2.60
  -9   7   0    5.80    2.80
   8  -7   0   68.39    7.50
   8  -7   0   73.09    7.20
   8  -7   0   73.49    8.20
   8  -7   0   75.39    7.90
   8  -7   0   80.69    8.00
   8  -7   0   74.19    7.70
   8  -7   0   79.99    8.10
   8  -7   0   58.19    4.40
   8  -7   0   69.49    7.20
   8  -7   0   66.49    7.10
  -8   7   0   66.59    7.30
  -8   7   0   70.19    6.60
  -8   7   0   71.89    7.80
  -8   7   0   69.49    8.00
  -8   7   0   68.79    7.90
  -8   7   0   64.19    5.00
   7  -7   0   10.10    2.90
   7  -7   0   12.10    2.50
   7  -7   0   10.90    3.10
   7  -7   0    9.40    2.90
   7  -7   0   19.30    4.10
   7  -7   0   13.00    3.30
   7  -7   0   12.10    3.20
   7  -7   0    9.70    2.90
   7  -7   0   15.10    3.60
   7  -7   0   11.70    3.00
   7  -7   0   10.90    2.90
   7  -7   0    8.30    2.60
  -7   7   0   17.80    4.20
  -7   7   0   18.70    3.80
  -7   7   0    7.60    2.80
  -7   7   0   13.30    2.90
  -7   7   0   13.70    3.10
  -7   7   0   17.90    3.60
  -7   7   0   13.10    3.50
  -7   7   0   12.00    2.70
   6  -7   0   61.49    4.50
   6  -7   0   67.29    4.00
   6  -7   0   61.09    6.00
   6  -7   0   70.99    7.10
   6  -7   0   74.39    7.10
   6  -7   0   68.69    5.30
   6  -7   0   68.89    5.20
   6  -7   0   60.89    4.30
   6  -7   0   66.39    4.00
   6  -7   0   66.69    5.10
   6  -7   0   63.79    6.40
   6  -7   0   60.89    6.30
   6  -7   0   57.39    4.30
   6  -7   0   62.49    4.20
   6  -7   0   71.39    5.30
   6  -7   0   59.79    6.30
   6  -7   0   64.09    6.00
   6  -7   0   68.19    5.20
  -6   7   0   66.79    5.40
  -6   7   0   70.49    5.70
  -6   7   0   68.79    4.90
  -6   7   0   66.89    5.20
  -6   7   0   76.19    6.00
  -6   7   0   58.49    6.20
  -6   7   0   66.59    4.90
  -6   7   0   64.39    6.40
   5  -7   0   50.99    4.70
   5  -7   0   46.60    3.50
   5  -7   0   53.69    4.20
   5  -7   0   46.70    4.90
   5  -7   0   54.99    5.60
   5  -7   0   50.19    4.60
   5  -7   0   58.79    5.60
   5  -7   0   48.80    5.10
   5  -7   0   43.20    4.80
   5  -7   0   51.59    4.80
   5  -7   0   51.29    5.50
   5  -7   0   46.70    5.30
   5  -7   0   52.19    5.10
   5  -7   0   63.99    6.00
   5  -7   0   51.39    4.80
   5  -7   0   46.60    5.40
   5  -7   0   43.00    3.20
   5  -7   0   47.50    5.30
   5  -7   0   44.70    3.20
   5  -7   0   54.89    5.90
   5  -7   0   45.50    4.50
  -5   7   0   53.49    5.00
  -5   7   0   63.19    6.10
  -5   7   0   61.49    4.90
  -5   7   0   57.49    5.70
  -5   7   0   64.79    5.10
  -5   7   0   62.09    6.30
  -5   7   0   63.69    4.60
  -5   7   0   63.69    4.90
   4  -7   0  329.37   12.10
   4  -7   0  350.16   11.40
   4  -7   0  325.57   11.50
   4  -7   0  338.17   12.30
   4  -7   0  317.37   10.10
   4  -7   0  338.77   11.90
   4  -7   0  313.47   10.70
   4  -7   0  335.17   11.20
   4  -7   0  326.87   11.70
   4  -7   0  338.27   10.00
   4  -7   0  318.17   11.20
   4  -7   0  309.37   11.20
   4  -7   0  310.07   11.80
   4  -7   0  319.57   11.00
   4  -7   0  321.97   11.50
   4  -7   0  311.27   11.20
   4  -7   0  320.87   12.00
   4  -7   0  324.77   12.10
   4  -7   0  357.66   10.50
   4  -7   0  317.57   10.90
   4  -7   0  321.77   11.70
  -4   7   0  323.47   11.70
  -4   7   0  333.27   12.20
  -4   7   0  348.47   12.30
  -4   7   0  341.87   12.30
  -4   7   0  343.97   12.60
  -4   7   0  352.86   11.60
  -4   7   0  314.37   12.10
  -4   7   0  322.27   12.10
  -4   7   0  321.57   10.60
   3  -7   0  394.86   12.50
   3  -7   0  376.96   11.80
   3  -7   0  370.86   12.90
   3  -7   0  375.96   12.70
   3  -7   0  373.56   11.50
   3  -7   0  371.16   12.80
   3  -7   0  371.86   12.90
   3  -7   0  370.66   12.40
   3  -7   0  402.06   13.10
   3  -7   0  375.56   12.00
   3  -7   0  368.46   12.10
   3  -7   0  365.66   12.50
   3  -7   0  373.46   12.70
   3  -7   0  363.76   10.00
   3  -7   0  396.06   13.20
   3  -7   0  372.56   12.80
   3  -7   0  371.16   12.40
   3  -7   0  360.96    9.90
   3  -7   0  371.76   11.80
  -3   7   0  351.66   12.20
  -3   7   0  366.06   12.80
  -3   7   0  358.16   12.30
  -3   7   0  346.07    9.60
  -3   7   0  359.06   11.70
  -3   7   0  359.86   11.80
  -3   7   0  353.46   11.90
  -3   7   0  367.46   12.40
  -3   7   0  368.56   13.80
  -3   7   0  343.17   12.20
  -3   7   0  324.77   12.20
  -3   7   0  356.76   11.60
  -3   7   0  339.47   12.00
   2  -7   0   76.19    4.80
   2  -7   0   79.39    4.80
   2  -7   0   85.29    5.00
   2  -7   0   84.59    4.70
   2  -7   0   87.79    4.20
   2  -7   0   78.89    4.50
   2  -7   0   92.79    5.20
   2  -7   0   73.89    4.50
   2  -7   0   85.39    5.10
   2  -7   0   80.79    4.90
   2  -7   0   81.09    5.00
   2  -7   0   77.69    5.10
   2  -7   0   88.29    4.00
   2  -7   0   86.89    4.20
   2  -7   0   76.99    4.70
   2  -7   0   87.69    5.40
   2  -7   0   83.09    5.10
   2  -7   0   85.79    3.80
   2  -7   0   78.29    5.00
   2  -7   0   91.69    5.30
  -2   7   0   79.69    4.90
  -2   7   0   93.39    5.00
  -2   7   0   99.19    5.30
  -2   7   0   84.99    4.50
  -2   7   0   78.59    5.10
  -2   7   0   81.99    5.00
  -2   7   0   89.99    4.50
  -2   7   0   83.19    5.00
  -2   7   0   85.29    5.40
  -2   7   0   85.89    4.70
  -2   7   0   86.39    4.20
  -2   7   0   89.19    5.20
  -2   7   0   85.39    3.70
  -2   7   0   92.09    5.40
  -2   7   0   80.09    4.70
   1  -7   0   14.20    2.20
   1  -7   0   11.90    2.40
   1  -7   0   15.20    2.60
   1  -7   0   11.50    2.20
   1  -7   0    8.90    2.00
   1  -7   0   17.00    2.40
   1  -7   0   16.10    2.70
   1  -7   0   13.30    2.60
   1  -7   0   13.60    2.60
   1  -7   0   13.40    2.40
   1  -7   0   11.00    1.70
   1  -7   0    7.60    2.00
   1  -7   0   12.50    2.10
   1  -7   0   16.60    2.00
   1  -7   0    9.70    2.40
   1  -7   0   12.30    2.50
   1  -7   0    6.10    2.10
   1  -7   0   16.00    2.70
   1  -7   0   13.30    2.70
  -1   7   0   16.00    2.80
  -1   7   0   15.30    2.70
  -1   7   0   21.60    3.30
  -1   7   0   16.50    2.70
  -1   7   0   20.80    3.10
  -1   7   0   22.00    2.40
  -1   7   0   15.60    2.70
  -1   7   0   16.00    2.70
  -1   7   0   15.70    2.60
  -1   7   0   13.30    2.40
  -1   7   0   15.20    2.50
  -1   7   0   18.70    2.80
  -1   7   0   17.30    2.30
  -1   7   0   16.40    2.20
  -1   7   0   19.50    2.40
   0  -7   0   62.99    4.30
   0  -7   0   56.49    2.40
   0  -7   0   60.59    3.90
   0  -7   0   60.79    4.10
   0  -7   0   56.69    4.20
   0  -7   0   59.59    4.20
   0  -7   0   50.69    5.00
   0  -7   0   51.79    3.70
   0  -7   0   56.79    4.20
   0  -7   0   55.29    3.00
   0  -7   0   59.79    4.60
   0  -7   0   50.39    4.80
   0  -7   0   47.40    4.90
   0  -7   0   50.39    3.70
   0  -7   0   59.79    4.00
   0  -7   0   52.69    3.90
   0   7   0   56.69    4.10
   0   7   0   58.39    3.50
   0   7   0   50.99    4.90
   0   7   0   58.29    3.60
   0   7   0   55.49    2.90
   0   7   0   54.29    4.20
   0   7   0   57.39    3.70
   0   7   0   61.79    4.40
   0   7   0   51.99    2.80
   0   7   0   53.99    3.60
   0   7   0   57.09    4.00
   0   7   0   55.59    4.00
   0   7   0   58.99    4.00
   0   7   0   56.69    4.50
   0   7   0   57.19    4.10
   0   7   0   62.09    4.10
   0   7   0   57.09    3.90
  -1  -7   0   34.20    4.00
  -1  -7   0   29.40    3.70
  -1  -7   0   32.30    4.10
  -1  -7   0   29.40    3.40
  -1  -7   0   27.10    1.80
  -1  -7   0   24.60    3.70
  -1  -7   0   26.60    3.70
  -1  -7   0   25.70    3.60
  -1  -7   0   28.70    3.80
  -1  -7   0   24.30    3.60
  -1  -7   0   29.70    3.80
  -1  -7   0   28.10    3.30
  -1  -7   0   29.20    3.20
  -1  -7   0   26.80    3.40
   1   7   0   27.80    3.30
   1   7   0   26.80    3.50
   1   7   0   27.70    3.40
   1   7   0   32.70    3.50
   1   7   0   23.70    3.20
   1   7   0   35.80    3.60
   1   7   0   25.20    1.80
   1   7   0   28.80    3.50
   1   7   0   24.50    3.30
   1   7   0   25.40    3.50
   1   7   0   25.60    3.60
   1   7   0   28.90    3.30
   1   7   0   30.80    4.30
   1   7   0   33.70    4.10
   1   7   0   30.00    3.70
   1   7   0   24.90    3.50
   1   7   0   25.20    3.00
   1   7   0   27.10    1.80
   1   7   0   28.70    3.50
   1   7   0   32.60    3.60
   1   7   0   30.20    3.50
  -2  -7   0   41.50    4.70
  -2  -7   0   39.90    4.60
  -2  -7   0   39.40    4.60
  -2  -7   0   39.90    4.30
  -2  -7   0   37.90    4.10
  -2  -7   0   50.79    5.20
  -2  -7   0   45.30    3.40
  -2  -7   0   37.50    4.40
  -2  -7   0   42.50    3.30
  -2  -7   0   50.29    5.10
  -2  -7   0   41.00    4.70
  -2  -7   0   40.20    4.00
  -2  -7   0   46.40    4.70
   2   7   0   32.30    3.50
   2   7   0   36.50    4.10
   2   7   0   26.50    3.70
   2   7   0   27.30    3.70
   2   7   0   24.10    3.20
   2   7   0   35.10    4.40
   2   7   0   39.00    4.20
   2   7   0   22.90    3.10
   2   7   0   38.40    4.20
   2   7   0   29.30    4.00
   2   7   0   26.00    3.90
   2   7   0   29.60    3.30
   2   7   0   28.10    3.60
   2   7   0   23.70    3.00
   2   7   0   30.30    4.10
   2   7   0   28.30    3.60
   2   7   0   34.30    3.80
  -3  -7   0  345.77   13.00
  -3  -7   0  373.46   13.20
  -3  -7   0  368.76   12.10
  -3  -7   0  354.96   13.30
  -3  -7   0  344.37   13.10
  -3  -7   0  368.86   13.80
  -3  -7   0  365.86   13.80
  -3  -7   0  374.56   13.30
  -3  -7   0  355.66   13.30
  -3  -7   0  371.76   12.00
  -3  -7   0  377.06   13.60
  -3  -7   0  378.16   13.90
  -3  -7   0  379.26   11.80
   3   7   0  308.67   11.80
   3   7   0  329.07   12.40
   3   7   0  335.17   12.30
   3   7   0  307.27   10.60
   3   7   0  311.57   11.70
   3   7   0  332.17   12.20
   3   7   0  311.07   10.20
   3   7   0  335.27   11.20
   3   7   0  311.57   11.90
   3   7   0  313.37   12.10
   3   7   0  319.07   12.30
   3   7   0  324.87   11.50
   3   7   0  316.07   11.60
   3   7   0  335.27   11.80
   3   7   0  319.47   10.60
   3   7   0  316.47   12.80
   3   7   0  318.17   11.90
   3   7   0  301.67   11.20
   3   7   0  347.67   12.30
  -4  -7   0  431.86   12.90
  -4  -7   0  431.66   15.50
  -4  -7   0  406.46   14.60
  -4  -7   0  390.96   14.70
  -4  -7   0  434.96   13.40
  -4  -7   0  421.96   14.90
  -4  -7   0  406.46   15.60
  -4  -7   0  448.96   15.20
  -4  -7   0  412.76   15.50
  -4  -7   0  445.86   15.50
  -4  -7   0  425.76   15.50
  -4  -7   0  436.66   15.10
  -4  -7   0  437.76   13.60
  -4  -7   0  442.16   16.10
  -4  -7   0  387.46   14.20
   4   7   0  399.56   14.50
   4   7   0  370.76   13.90
   4   7   0  404.46   14.50
   4   7   0  380.66   14.30
   4   7   0  397.66   13.80
   4   7   0  378.36   13.30
   4   7   0  366.86   14.70
   4   7   0  398.86   14.50
   4   7   0  394.96   12.50
   4   7   0  384.86   14.40
   4   7   0  371.16   13.30
   4   7   0  403.66   14.60
   4   7   0  385.46   13.70
   4   7   0  381.96   14.10
   4   7   0  396.86   14.70
   4   7   0  390.16   12.30
   4   7   0  416.66   14.70
   4   7   0  400.46   14.00
   4   7   0  406.96   12.30
  -5  -7   0  385.36   14.40
  -5  -7   0  336.77   11.80
  -5  -7   0  358.26   13.30
  -5  -7   0  357.96   14.80
  -5  -7   0  356.86   14.40
  -5  -7   0  337.87   11.60
  -5  -7   0  353.86   14.90
  -5  -7   0  354.86   14.50
  -5  -7   0  346.87   13.60
  -5  -7   0  368.36   13.60
  -5  -7   0  353.46   14.30
  -5  -7   0  364.96   14.00
  -5  -7   0  356.16   13.50
   5   7   0  342.47   12.80
   5   7   0  342.17   13.50
   5   7   0  353.76   14.10
   5   7   0  342.17   13.10
   5   7   0  323.57   13.40
   5   7   0  347.67   13.50
   5   7   0  318.17   13.40
   5   7   0  347.57   13.20
   5   7   0  341.17   11.90
   5   7   0  336.67   10.70
   5   7   0  323.77   10.70
   5   7   0  304.27   13.20
   5   7   0  342.47   12.40
   5   7   0  350.16   14.20
   5   7   0  338.37   13.50
   5   7   0  339.17   13.70
   5   7   0  342.17   13.80
   5   7   0  351.86   13.90
   5   7   0  339.17   14.00
  -6  -7   0   44.10    5.50
  -6  -7   0   54.19    6.80
  -6  -7   0   61.59    6.10
  -6  -7   0   66.69    6.50
  -6  -7   0   54.69    6.60
  -6  -7   0   35.90    5.10
  -6  -7   0   48.00    6.20
  -6  -7   0   44.00    5.20
  -6  -7   0   47.70    6.60
  -6  -7   0   51.09    5.40
  -6  -7   0   50.29    6.40
  -6  -7   0   52.89    6.90
   6   7   0   48.50    6.30
   6   7   0   52.99    6.30
   6   7   0   41.70    5.80
   6   7   0   51.49    6.20
   6   7   0   45.00    6.00
   6   7   0   47.50    6.20
   6   7   0   55.69    6.70
   6   7   0   40.40    6.10
   6   7   0   53.99    6.10
   6   7   0   45.70    6.10
   6   7   0   47.90    6.20
   6   7   0   43.50    4.90
   6   7   0   49.10    6.20
   6   7   0   44.30    5.00
  -7  -7   0   14.60    3.80
  -7  -7   0    9.10    3.30
  -7  -7   0   12.70    4.00
  -7  -7   0   12.40    3.80
  -7  -7   0   11.70    3.00
  -7  -7   0    9.80    3.30
  -7  -7   0   14.50    3.60
  -7  -7   0   11.50    3.30
  -7  -7   0    7.80    3.40
  -7  -7   0   12.00    3.00
   7   7   0    6.40    2.10
   7   7   0    6.20    2.90
   7   7   0    9.80    3.40
   7   7   0    6.90    3.20
   7   7   0    7.20    3.30
   7   7   0    7.40    3.40
   7   7   0   10.00    3.50
   7   7   0   13.90    3.80
   7   7   0    8.60    3.20
   7   7   0    9.60    3.10
  -8  -7   0   13.60    3.90
  -8  -7   0   24.70    5.30
  -8  -7   0   23.30    5.00
  -8  -7   0   13.60    4.20
  -8  -7   0   27.90    5.40
  -8  -7   0   17.70    4.50
  -8  -7   0   19.50    4.30
  -8  -7   0   24.80    4.30
  -8  -7   0   12.80    3.70
   8   7   0   20.70    4.70
   8   7   0   19.20    4.80
   8   7   0   18.40    4.60
   8   7   0   16.60    4.50
   8   7   0   19.40    3.40
   8   7   0   28.20    5.40
   8   7   0   16.40    4.50
   8   7   0   14.10    4.40
   8   7   0   19.30    4.50
  -9  -7   0    8.60    3.90
  -9  -7   0    5.90    3.30
  -9  -7   0    5.00    3.30
  -9  -7   0    4.60    3.10
  -9  -7   0    4.90    3.50
  -9  -7   0    6.80    3.60
  -9  -7   0    5.60    3.10
  -9  -7   0    4.60    2.40
  -9  -7   0    0.50    2.60
   9   7   0    3.40    2.80
   9   7   0    4.80    3.50
   9   7   0    1.70    2.70
   9   7   0    2.00    2.80
   9   7   0    4.40    3.20
   9   7   0    0.10    2.60
   9   7   0    0.40    2.60
   9   7   0    0.60    2.80
   9   7   0    3.10    2.00
 -10  -7   0    8.90    4.20
 -10  -7   0    4.60    2.20
 -10  -7   0    4.00    4.00
 -10  -7   0    3.90    3.50
 -10  -7   0    9.40    4.00
  10   7   0    2.60    3.60
  10   7   0    0.60    3.20
  10   7   0   13.30    2.80
  10   7   0    3.50    3.50
  10   7   0    4.10    3.30
  10   7   0    7.70    4.50
  10   7   0   16.80    5.40
  12  -8   0    7.70    4.00
  12  -8   0    4.40    3.30
  12  -8   0    0.90    2.90
  12  -8   0    5.20    3.40
  12  -8   0    1.20    3.10
 -12   8   0   -0.80    2.80
 -12   8   0   -0.50    3.00
 -12   8   0    0.20    3.10
 -12   8   0    0.50    2.90
 -12   8   0    6.20    4.00
  11  -8   0   20.00    4.90
  11  -8   0   20.00    5.10
  11  -8   0   20.50    5.10
  11  -8   0   19.20    5.00
  11  -8   0   22.20    3.40
  11  -8   0   19.00    5.00
  11  -8   0   26.90    5.50
  11  -8   0   21.00    5.20
  11  -8   0   20.10    5.00
 -11   8   0   25.10    5.70
 -11   8   0   26.30    6.00
 -11   8   0   35.50    5.20
 -11   8   0   32.60    6.80
  10  -8   0   16.60    4.60
  10  -8   0   13.80    4.20
  10  -8   0   13.40    2.90
  10  -8   0    9.40    3.40
  10  -8   0    9.40    3.80
  10  -8   0   13.10    4.20
  10  -8   0   12.30    4.10
  10  -8   0    7.90    3.20
  10  -8   0   10.00    3.60
 -10   8   0   10.30    4.20
 -10   8   0   13.70    4.40
 -10   8   0   16.70    4.60
 -10   8   0    7.70    3.80
 -10   8   0   10.00    2.90
   9  -8   0   20.10    4.50
   9  -8   0   23.00    4.80
   9  -8   0   19.20    4.30
   9  -8   0   16.90    4.20
   9  -8   0   30.10    5.40
   9  -8   0   20.20    4.60
   9  -8   0   24.70    4.80
   9  -8   0   24.40    5.00
   9  -8   0   26.20    3.70
   9  -8   0   22.70    4.70
  -9   8   0   19.10    4.60
  -9   8   0   17.60    4.40
  -9   8   0   15.90    4.10
  -9   8   0   17.00    4.40
  -9   8   0   24.40    4.10
  -9   8   0   21.30    4.30
   8  -8   0   12.70    3.50
   8  -8   0   12.90    3.50
   8  -8   0    9.90    3.40
   8  -8   0   11.20    3.40
   8  -8   0   10.80    3.30
   8  -8   0   10.50    2.60
   8  -8   0    9.70    3.40
   8  -8   0    9.70    3.10
   8  -8   0   13.10    3.80
   8  -8   0   11.20    3.60
  -8   8   0    7.70    3.30
  -8   8   0    5.90    2.60
  -8   8   0    8.90    3.20
  -8   8   0    4.30    2.90
  -8   8   0    3.20    2.00
  -8   8   0    4.60    2.60
   7  -8   0   26.40    4.30
   7  -8   0   21.60    4.20
   7  -8   0   23.90    4.50
   7  -8   0   28.10    4.80
   7  -8   0   23.50    4.40
   7  -8   0   22.80    3.70
   7  -8   0   27.30    4.60
   7  -8   0   27.50    4.90
   7  -8   0   30.20    4.70
   7  -8   0   27.10    4.70
   7  -8   0   18.40    4.20
   7  -8   0   26.70    4.40
  -7   8   0   17.30    3.90
  -7   8   0   26.00    4.20
  -7   8   0   23.90    4.40
  -7   8   0   24.40    4.00
  -7   8   0   33.50    5.10
  -7   8   0   30.40    4.80
  -7   8   0   23.20    4.50
  -7   8   0   28.50    5.20
   6  -8   0   39.20    5.20
   6  -8   0   35.40    4.70
   6  -8   0   23.60    4.20
   6  -8   0   32.20    4.70
   6  -8   0   39.60    5.10
   6  -8   0   35.60    4.80
   6  -8   0   40.80    5.20
   6  -8   0   36.10    5.00
   6  -8   0   42.50    4.40
   6  -8   0   39.30    5.50
   6  -8   0   41.90    4.60
   6  -8   0   30.40    4.60
   6  -8   0   42.60    5.10
   6  -8   0   39.80    4.60
   6  -8   0   33.70    4.20
   6  -8   0   41.60    5.70
   6  -8   0   39.60    4.20
   6  -8   0   36.90    4.30
  -6   8   0   26.80    4.30
  -6   8   0   33.50    4.40
  -6   8   0   29.80    4.70
  -6   8   0   34.90    4.80
  -6   8   0   35.10    5.10
  -6   8   0   34.00    5.00
  -6   8   0   36.00    5.10
  -6   8   0   25.20    4.20
   5  -8   0   70.79    4.60
   5  -8   0   55.79    5.80
   5  -8   0   63.69    4.80
   5  -8   0   76.69    5.30
   5  -8   0   72.59    5.60
   5  -8   0   73.49    5.10
   5  -8   0   69.09    4.70
   5  -8   0   61.69    5.10
   5  -8   0   64.19    4.50
   5  -8   0   66.89    5.20
   5  -8   0   68.29    4.80
   5  -8   0   70.99    4.90
   5  -8   0   64.89    5.10
   5  -8   0   74.99    5.70
   5  -8   0   67.99    4.70
   5  -8   0   67.09    5.40
   5  -8   0   62.49    4.80
   5  -8   0   66.19    6.30
  -5   8   0   69.79    5.50
  -5   8   0   76.69    5.70
  -5   8   0   80.99    5.20
  -5   8   0   65.89    6.40
  -5   8   0   67.99    5.10
  -5   8   0   74.29    5.70
  -5   8   0   70.79    5.70
  -5   8   0   73.99    5.60
   4  -8   0   31.60    4.30
   4  -8   0   38.10    4.60
   4  -8   0   42.80    3.90
   4  -8   0   40.70    3.20
   4  -8   0   41.90    5.00
   4  -8   0   39.30    4.20
   4  -8   0   36.10    4.10
   4  -8   0   37.10    4.20
   4  -8   0   45.90    4.70
   4  -8   0   35.80    4.20
   4  -8   0   38.70    3.70
   4  -8   0   47.00    5.20
   4  -8   0   31.60    4.10
   4  -8   0   40.40    4.40
   4  -8   0   39.70    4.70
   4  -8   0   39.30    4.80
   4  -8   0   37.80    4.50
   4  -8   0   40.40    4.70
   4  -8   0   39.10    4.80
   4  -8   0   43.00    4.90
  -4   8   0   37.50    4.70
  -4   8   0   36.90    4.40
  -4   8   0   35.00    4.10
  -4   8   0   42.90    4.20
  -4   8   0   39.80    4.80
  -4   8   0   34.30    4.70
  -4   8   0   42.10    5.20
  -4   8   0   39.50    4.70
  -4   8   0   37.30    4.70
  -4   8   0   39.00    4.90
  -4   8   0   44.10    4.80
  -4   8   0   37.20    4.70
   3  -8   0  193.08    6.50
   3  -8   0  175.88    7.50
   3  -8   0  176.98    8.00
   3  -8   0  195.98    8.50
   3  -8   0  191.68    8.10
   3  -8   0  189.48    8.50
   3  -8   0  181.68    8.20
   3  -8   0  169.88    8.40
   3  -8   0  186.08    8.70
   3  -8   0  190.58    8.10
   3  -8   0  187.08    7.50
   3  -8   0  188.78    7.60
   3  -8   0  193.08    8.80
   3  -8   0  199.68    8.90
   3  -8   0  195.58    8.70
   3  -8   0  195.38    8.70
   3  -8   0  188.98    8.50
   3  -8   0  191.58    8.70
  -3   8   0  185.28    8.30
  -3   8   0  170.78    8.20
  -3   8   0  172.68    8.70
  -3   8   0  169.78    7.60
  -3   8   0  181.68    8.00
  -3   8   0  178.28    8.10
  -3   8   0  170.68    8.40
  -3   8   0  170.78    8.20
  -3   8   0  178.38    8.20
  -3   8   0  187.58    7.70
  -3   8   0  177.38    8.10
  -3   8   0  193.48    8.00
   2  -8   0  400.16   13.10
   2  -8   0  393.76   12.90
   2  -8   0  373.36   13.00
   2  -8   0  389.06   13.60
   2  -8   0  394.56   13.50
   2  -8   0  370.26   13.30
   2  -8   0  395.46   13.30
   2  -8   0  383.26   13.10
   2  -8   0  377.56   13.70
   2  -8   0  401.86   11.70
   2  -8   0  388.56   14.00
   2  -8   0  385.76   11.40
   2  -8   0  385.66   13.40
   2  -8   0  388.76   11.50
   2  -8   0  380.46   13.50
   2  -8   0  371.96   11.50
   2  -8   0  371.06   13.20
   2  -8   0  410.96   12.50
   2  -8   0  382.36   13.60
  -2   8   0  402.56   12.00
  -2   8   0  376.06   13.00
  -2   8   0  389.66   13.40
  -2   8   0  385.36   12.90
  -2   8   0  354.46   13.20
  -2   8   0  368.46   12.80
  -2   8   0  381.66   11.50
  -2   8   0  373.36   11.90
  -2   8   0  394.66   13.50
  -2   8   0  391.86   13.70
  -2   8   0  380.96   12.70
  -2   8   0  364.86   13.20
  -2   8   0  389.26   11.90
  -2   8   0  372.86   13.20
   1  -8   0  169.28    8.40
   1  -8   0  178.08    8.00
   1  -8   0  174.68    7.90
   1  -8   0  177.38    7.90
   1  -8   0  175.08    7.90
   1  -8   0  172.38    6.70
   1  -8   0  167.78    7.60
   1  -8   0  183.78    6.20
   1  -8   0  177.68    7.00
   1  -8   0  169.08    7.90
   1  -8   0  166.38    8.40
   1  -8   0  172.38    7.80
   1  -8   0  186.78    8.50
   1  -8   0  166.88    8.30
   1  -8   0  177.78    7.10
   1  -8   0  166.68    7.90
   1  -8   0  174.68    8.10
   1  -8   0  187.98    8.50
   1  -8   0  178.28    7.60
   1  -8   0  174.48    6.20
  -1   8   0  137.59    7.20
  -1   8   0  147.89    6.80
  -1   8   0  157.78    7.80
  -1   8   0  137.29    6.90
  -1   8   0  140.49    5.80
  -1   8   0  131.69    6.90
  -1   8   0  156.38    7.40
  -1   8   0  136.59    6.60
  -1   8   0  146.89    6.90
  -1   8   0  135.99    5.90
  -1   8   0  149.88    7.40
  -1   8   0  154.68    7.20
  -1   8   0  154.78    5.90
  -1   8   0  151.58    7.30
  -1   8   0  140.49    7.40
  -1   8   0  146.59    5.80
   0  -8   0  342.47   12.50
   0  -8   0  361.46   12.60
   0  -8   0  343.77   10.30
   0  -8   0  349.96   12.00
   0  -8   0  364.66   11.90
   0  -8   0  337.07   12.50
   0  -8   0  354.96   13.10
   0  -8   0  352.06   13.00
   0  -8   0  324.67   11.90
   0  -8   0  351.46   12.80
   0  -8   0  357.06   13.40
   0  -8   0  346.97   12.40
   0  -8   0  365.66   13.40
   0  -8   0  369.36   12.20
   0  -8   0  371.16   12.60
   0   8   0  321.77   10.60
   0   8   0  333.97    9.60
   0   8   0  332.67   11.30
   0   8   0  318.17   11.10
   0   8   0  318.97   11.50
   0   8   0  340.27   11.80
   0   8   0  320.97   11.80
   0   8   0  315.57   11.50
   0   8   0  312.07   12.20
   0   8   0  327.17   12.30
   0   8   0  321.67   10.50
   0   8   0  317.47   12.50
   0   8   0  328.97   11.80
   0   8   0  332.77    9.50
   0   8   0  324.77   11.70
   0   8   0  308.17   11.60
   0   8   0  305.57   11.70
  -1  -8   0   20.80    3.40
  -1  -8   0   17.40    3.30
  -1  -8   0   16.30    3.40
  -1  -8   0   22.50    3.20
  -1  -8   0   27.80    3.90
  -1  -8   0   21.30    3.70
  -1  -8   0   25.50    4.20
  -1  -8   0   18.80    3.10
  -1  -8   0   20.80    3.10
  -1  -8   0   17.50    3.30
  -1  -8   0   22.00    3.30
  -1  -8   0   19.00    3.30
  -1  -8   0   21.80    3.70
   1   8   0   12.00    2.40
   1   8   0   15.20    2.60
   1   8   0   14.40    3.10
   1   8   0   19.50    3.20
   1   8   0    4.90    1.90
   1   8   0    9.90    2.30
   1   8   0   17.20    3.10
   1   8   0   10.90    2.40
   1   8   0   14.60    2.80
   1   8   0   10.70    2.70
   1   8   0   13.90    2.60
   1   8   0   13.00    2.90
   1   8   0   12.70    2.70
   1   8   0    9.60    2.50
   1   8   0   11.70    2.40
   1   8   0   12.80    2.90
  -2  -8   0   11.10    2.40
  -2  -8   0   14.80    3.20
  -2  -8   0   12.00    2.90
  -2  -8   0   10.10    2.80
  -2  -8   0    8.30    2.60
  -2  -8   0    9.70    2.60
  -2  -8   0    7.20    2.40
  -2  -8   0    9.90    2.50
  -2  -8   0   13.50    3.20
  -2  -8   0   10.30    2.60
  -2  -8   0   10.10    2.70
  -2  -8   0   12.10    2.40
  -2  -8   0   14.50    2.80
   2   8   0   11.10    2.90
   2   8   0    9.90    2.40
   2   8   0   13.20    2.70
   2   8   0   10.60    2.70
   2   8   0    7.40    2.20
   2   8   0   10.90    2.60
   2   8   0   11.90    2.70
   2   8   0   11.30    3.10
   2   8   0    7.40    2.00
   2   8   0    6.00    2.10
   2   8   0   13.40    3.20
   2   8   0   12.60    3.00
   2   8   0   11.30    2.70
   2   8   0    9.90    2.20
   2   8   0   12.30    2.60
   2   8   0   15.80    2.80
  -3  -8   0   26.50    4.10
  -3  -8   0   30.10    4.50
  -3  -8   0   26.40    4.30
  -3  -8   0   35.90    3.90
  -3  -8   0   26.60    3.90
  -3  -8   0   39.30    5.10
  -3  -8   0   30.10    3.80
  -3  -8   0   46.30    5.50
  -3  -8   0   29.40    3.70
  -3  -8   0   30.20    4.40
  -3  -8   0   31.80    4.60
  -3  -8   0   29.00    4.10
  -3  -8   0   39.90    4.70
  -3  -8   0   29.90    4.60
  -3  -8   0   28.20    4.50
   3   8   0   26.10    3.90
   3   8   0   37.50    4.20
   3   8   0   30.30    3.90
   3   8   0   30.40    4.40
   3   8   0   34.70    4.80
   3   8   0   36.00    4.30
   3   8   0   33.40    4.60
   3   8   0   24.80    4.20
   3   8   0   36.10    4.50
   3   8   0   33.00    4.50
   3   8   0   34.20    4.70
   3   8   0   27.70    3.90
   3   8   0   27.90    4.20
   3   8   0   34.20    4.00
   3   8   0   38.00    4.70
   3   8   0   38.30    3.70
   3   8   0   24.60    3.90
   3   8   0   32.60    4.50
  -4  -8   0   20.10    3.90
  -4  -8   0   25.90    4.40
  -4  -8   0   27.50    4.70
  -4  -8   0   24.30    3.50
  -4  -8   0   26.40    4.00
  -4  -8   0   18.10    3.90
  -4  -8   0   27.10    4.40
  -4  -8   0   26.00    4.40
  -4  -8   0   24.00    4.40
  -4  -8   0   25.20    4.40
  -4  -8   0   27.20    4.40
  -4  -8   0   18.80    3.60
  -4  -8   0   19.60    3.20
  -4  -8   0   23.40    4.10
  -4  -8   0   26.60    4.60
   4   8   0   30.10    4.70
   4   8   0   40.40    5.50
   4   8   0   38.60    5.20
   4   8   0   32.40    4.80
   4   8   0   31.80    4.80
   4   8   0   32.90    4.70
   4   8   0   32.80    4.90
   4   8   0   30.10    3.70
   4   8   0   34.60    4.60
   4   8   0   31.30    4.60
   4   8   0   32.40    4.70
   4   8   0   25.20    4.10
   4   8   0   26.40    4.30
   4   8   0   29.70    4.60
   4   8   0   36.00    4.50
   4   8   0   32.80    5.30
   4   8   0   29.10    3.50
  -5  -8   0  148.89    8.90
  -5  -8   0  137.89    8.20
  -5  -8   0  138.99    8.20
  -5  -8   0  148.09    8.40
  -5  -8   0  139.19    8.20
  -5  -8   0  142.29    8.90
  -5  -8   0  129.49    7.80
  -5  -8   0  138.59    8.50
  -5  -8   0  141.59    9.20
  -5  -8   0  132.29    8.80
  -5  -8   0  148.79    9.00
  -5  -8   0  142.69    8.00
   5   8   0  143.99    8.50
   5   8   0  129.29    8.30
   5   8   0  137.69    7.60
   5   8   0  136.79    8.00
   5   8   0  132.59    8.40
   5   8   0  127.79    8.30
   5   8   0  145.39    8.90
   5   8   0  161.38    9.00
   5   8   0  143.29    7.90
   5   8   0  139.59    8.20
   5   8   0  142.89    8.90
   5   8   0  140.29    8.50
   5   8   0  138.69    6.50
   5   8   0  138.29    8.40
   5   8   0  146.19    8.20
   5   8   0  135.49    6.40
  -6  -8   0   79.99    7.90
  -6  -8   0   76.79    5.90
  -6  -8   0   59.59    7.60
  -6  -8   0   77.59    8.10
  -6  -8   0   69.69    7.30
  -6  -8   0   56.09    6.40
  -6  -8   0   58.49    7.00
  -6  -8   0   78.79    7.70
  -6  -8   0   78.39    7.50
  -6  -8   0   58.59    6.70
  -6  -8   0   65.59    7.60
  -6  -8   0   68.19    8.00
   6   8   0   43.50    6.10
   6   8   0   58.49    7.00
   6   8   0   46.80    6.20
   6   8   0   40.50    5.70
   6   8   0   64.59    7.20
   6   8   0   59.69    6.40
   6   8   0   40.90    6.00
   6   8   0   55.29    6.80
   6   8   0   42.90    6.30
   6   8   0   49.90    5.50
   6   8   0   49.50    6.70
   6   8   0   52.69    6.70
  -7  -8   0   25.60    5.40
  -7  -8   0   39.00    6.10
  -7  -8   0   25.90    4.30
  -7  -8   0   40.10    6.10
  -7  -8   0   27.20    4.90
  -7  -8   0   26.20    4.90
  -7  -8   0   36.70    6.40
  -7  -8   0   35.70    5.30
  -7  -8   0   28.20    5.30
  -7  -8   0   28.80    5.40
   7   8   0   17.10    4.60
   7   8   0   18.40    4.90
   7   8   0   23.40    4.90
   7   8   0   23.40    5.00
   7   8   0   16.50    4.20
   7   8   0   19.80    4.60
   7   8   0   18.00    3.50
   7   8   0   23.80    4.80
   7   8   0   20.30    4.40
  -8  -8   0   17.30    4.60
  -8  -8   0   16.70    3.60
  -8  -8   0   20.50    5.10
  -8  -8   0   18.20    4.50
  -8  -8   0   13.40    4.00
  -8  -8   0   15.70    4.20
  -8  -8   0   13.60    3.90
  -8  -8   0   17.70    4.90
  -8  -8   0   19.90    5.30
   8   8   0   15.40    4.30
   8   8   0   11.60    4.20
   8   8   0   12.10    4.30
   8   8   0   17.10    4.60
   8   8   0   16.80    4.30
   8   8   0   20.40    5.20
   8   8   0   15.80    4.70
   8   8   0   28.60    6.20
   8   8   0   11.20    2.90
  -9  -8   0   58.19    8.20
  -9  -8   0   52.19    6.30
  -9  -8   0   46.60    8.00
  -9  -8   0   45.20    7.20
  -9  -8   0   52.09    7.30
  -9  -8   0   49.30    6.70
  -9  -8   0   51.59    7.70
  -9  -8   0   67.69    8.30
  -9  -8   0   50.79    7.10
   9   8   0   59.89    8.00
   9   8   0   55.59    8.50
   9   8   0   64.49    8.90
   9   8   0   57.99    8.30
   9   8   0   57.69    8.10
   9   8   0   57.39    8.00
   9   8   0   59.49    8.30
   9   8   0   61.19    6.20
   9   8   0   59.49    7.80
 -10  -8   0   12.30    4.30
 -10  -8   0   17.50    5.10
 -10  -8   0   18.10    4.10
 -10  -8   0   11.50    4.20
 -10  -8   0   13.30    4.70
  10   8   0    8.80    4.00
  10   8   0   10.50    4.60
  10   8   0   14.00    4.90
  10   8   0   11.10    4.70
  10   8   0   17.60    3.50
  10   8   0    6.80    3.80
  10   8   0   10.40    4.80
  11  -9   0    2.70    2.80
  11  -9   0    1.00    2.80
  11  -9   0   -2.90    2.50
  11  -9   0    1.70    2.80
  11  -9   0    2.90    1.80
  11  -9   0    5.00    3.40
  11  -9   0   10.40    4.40
  11  -9   0    0.70    3.00
  11  -9   0    3.00    3.30
 -11   9   0    3.80    2.40
 -11   9   0    6.20    3.70
 -11   9   0    5.70    3.70
 -11   9   0    2.90    3.50
 -11   9   0    1.40    3.10
 -11   9   0    6.40    3.50
  10  -9   0   16.00    4.50
  10  -9   0   11.70    2.80
  10  -9   0    8.90    3.60
  10  -9   0   12.20    4.10
  10  -9   0   22.90    5.10
  10  -9   0   22.40    5.20
  10  -9   0   19.70    4.90
  10  -9   0   13.00    4.40
  10  -9   0   19.90    5.10
 -10   9   0   24.60    5.70
 -10   9   0   20.20    4.10
 -10   9   0   21.60    5.30
 -10   9   0   16.70    4.70
 -10   9   0   15.00    4.50
 -10   9   0   26.70    5.70
 -10   9   0   18.00    5.00
   9  -9   0   51.09    7.10
   9  -9   0   38.70    6.30
   9  -9   0   43.70    6.60
   9  -9   0   37.70    4.70
   9  -9   0   45.90    6.50
   9  -9   0   50.89    7.10
   9  -9   0   48.20    6.80
   9  -9   0   48.00    6.80
   9  -9   0   40.60    6.30
   9  -9   0   33.40    6.00
  -9   9   0   44.90    5.50
  -9   9   0   57.09    7.80
  -9   9   0   39.10    6.60
  -9   9   0   52.19    7.30
  -9   9   0   50.29    7.00
   8  -9   0   83.79    8.70
   8  -9   0   84.99    8.30
   8  -9   0   95.09    9.10
   8  -9   0   93.69    7.20
   8  -9   0  100.09    7.20
   8  -9   0   86.09    8.80
   8  -9   0   89.69    7.30
   8  -9   0   92.09    6.10
   8  -9   0   80.59    8.80
   8  -9   0   66.59    7.60
  -8   9   0   75.19    8.40
  -8   9   0   95.29    9.40
  -8   9   0   90.99   11.30
  -8   9   0   81.09    6.20
  -8   9   0   77.19    8.60
  -8   9   0   79.29    8.60
   7  -9   0  101.89    7.10
   7  -9   0  111.89    7.30
   7  -9   0  102.09    7.20
   7  -9   0  111.79    7.90
   7  -9   0  104.69    7.60
   7  -9   0  105.69    7.20
   7  -9   0   94.59    7.40
   7  -9   0  109.29    7.50
   7  -9   0  103.59    7.60
   7  -9   0   98.49    6.50
   7  -9   0  111.39    7.80
  -7   9   0   99.09    6.70
  -7   9   0  104.79    7.60
  -7   9   0   91.29    7.10
  -7   9   0  107.09    7.00
  -7   9   0  103.09    7.60
  -7   9   0  101.19    7.70
  -7   9   0  112.99    7.60
  -7   9   0   90.49    7.30
   6  -9   0  128.19    8.10
   6  -9   0  129.49    7.50
   6  -9   0  129.29    8.10
   6  -9   0  121.39    7.70
   6  -9   0  131.79    7.90
   6  -9   0  144.39    7.40
   6  -9   0  141.69    7.70
   6  -9   0  122.09    7.90
   6  -9   0  131.99    7.60
   6  -9   0  149.39    7.80
   6  -9   0  143.79    7.10
   6  -9   0  136.89    8.60
   6  -9   0  135.29    7.30
   6  -9   0  134.89    8.40
   6  -9   0  140.59    7.10
   6  -9   0  130.89    7.00
   6  -9   0  134.99    8.40
  -6   9   0  152.38    8.70
  -6   9   0  152.48    8.30
  -6   9   0  151.18    8.50
  -6   9   0  144.89    8.80
  -6   9   0  139.99    8.60
  -6   9   0  150.38    8.70
  -6   9   0  151.38    8.80
  -6   9   0  145.59    8.80
  -6   9   0  152.48    8.10
  -6   9   0  153.58    8.70
   5  -9   0   10.40    2.60
   5  -9   0   14.30    3.20
   5  -9   0    9.10    2.50
   5  -9   0   11.80    3.10
   5  -9   0    7.30    2.80
   5  -9   0    8.40    2.50
   5  -9   0    8.90    2.50
   5  -9   0    8.80    2.60
   5  -9   0   13.10    3.10
   5  -9   0    8.20    2.70
   5  -9   0   12.50    3.30
   5  -9   0   12.80    3.30
   5  -9   0    6.10    2.20
   5  -9   0    6.70    2.70
   5  -9   0    6.90    2.60
   5  -9   0   12.60    2.80
   5  -9   0   10.50    3.10
  -5   9   0   14.50    3.40
  -5   9   0   13.70    2.90
  -5   9   0   14.60    3.50
  -5   9   0   16.00    3.70
  -5   9   0   12.40    2.80
  -5   9   0   11.40    3.10
  -5   9   0   17.00    3.60
  -5   9   0   12.50    3.30
  -5   9   0   10.70    3.10
  -5   9   0   10.70    2.90
  -5   9   0   14.00    3.20
   4  -9   0   14.50    3.10
   4  -9   0   10.20    2.90
   4  -9   0    7.70    2.30
   4  -9   0   10.90    2.90
   4  -9   0   13.90    3.00
   4  -9   0   18.70    3.70
   4  -9   0   17.40    3.20
   4  -9   0   18.40    3.70
   4  -9   0    9.70    2.90
   4  -9   0   10.60    2.90
   4  -9   0   20.00    3.50
   4  -9   0   13.70    2.60
   4  -9   0   14.00    3.00
   4  -9   0   12.30    3.00
   4  -9   0   21.80    3.70
   4  -9   0   10.20    2.80
   4  -9   0   16.20    3.50
   4  -9   0   14.80    3.20
  -4   9   0    7.30    2.60
  -4   9   0    9.30    2.70
  -4   9   0   11.20    3.00
  -4   9   0   10.80    2.70
  -4   9   0    9.90    2.60
  -4   9   0   10.50    2.80
  -4   9   0   10.00    3.10
  -4   9   0   10.30    2.90
  -4   9   0    7.40    2.80
  -4   9   0   11.90    3.00
  -4   9   0    9.00    2.50
   3  -9   0  228.08    9.50
   3  -9   0  241.18   10.60
   3  -9   0  219.88    9.60
   3  -9   0  236.38   10.50
   3  -9   0  232.68   10.20
   3  -9   0  233.78   10.20
   3  -9   0  234.68   10.10
   3  -9   0  237.18    8.80
   3  -9   0  242.88   10.70
   3  -9   0  222.08    9.50
   3  -9   0  237.08   10.40
   3  -9   0  237.18   10.20
   3  -9   0  231.18    8.70
   3  -9   0  232.68    9.30
   3  -9   0  217.18    9.80
   3  -9   0  232.88   10.20
   3  -9   0  229.98   10.40
  -3   9   0  225.18    9.70
  -3   9   0  217.38    9.90
  -3   9   0  214.38    9.50
  -3   9   0  229.28   10.20
  -3   9   0  223.88    9.10
  -3   9   0  240.58    9.20
  -3   9   0  200.68    9.40
  -3   9   0  232.68   10.30
  -3   9   0  224.88    9.40
  -3   9   0  229.58   10.10
  -3   9   0  236.58   10.50
  -3   9   0  220.88    9.70
   2  -9   0   82.39    4.90
   2  -9   0   78.49    4.30
   2  -9   0   77.89    5.50
   2  -9   0   87.89    4.50
   2  -9   0   82.19    4.40
   2  -9   0   67.99    5.10
   2  -9   0   82.69    5.80
   2  -9   0   75.59    5.30
   2  -9   0   76.79    5.40
   2  -9   0   81.99    5.70
   2  -9   0   76.99    5.20
   2  -9   0   73.19    5.30
   2  -9   0   77.09    5.60
   2  -9   0   80.29    5.80
   2  -9   0   77.09    5.50
   2  -9   0   84.29    6.10
   2  -9   0   74.99    5.40
   2  -9   0   72.69    5.70
   2  -9   0   74.29    4.40
  -2   9   0   80.09    5.60
  -2   9   0   81.79    5.90
  -2   9   0   83.19    5.30
  -2   9   0   86.19    5.90
  -2   9   0   78.79    5.60
  -2   9   0   85.49    4.80
  -2   9   0   75.29    5.40
  -2   9   0   81.99    5.70
  -2   9   0   77.29    5.20
  -2   9   0   83.69    5.80
  -2   9   0   86.29    5.50
  -2   9   0   77.99    4.70
  -2   9   0   83.79    4.60
   1  -9   0  203.48    8.70
   1  -9   0  194.18    8.70
   1  -9   0  201.38    9.20
   1  -9   0  186.58    8.90
   1  -9   0  195.58    9.00
   1  -9   0  200.88    7.60
   1  -9   0  193.28    9.40
   1  -9   0  194.98    8.90
   1  -9   0  191.28    8.00
   1  -9   0  196.58    8.90
   1  -9   0  194.68    9.50
   1  -9   0  204.88    9.90
   1  -9   0  201.78    9.00
   1  -9   0  190.68    7.80
   1  -9   0  185.58    8.90
   1  -9   0  188.28    9.30
   1  -9   0  212.18    9.50
  -1   9   0  188.88    8.90
  -1   9   0  178.38    9.00
  -1   9   0  191.28    8.40
  -1   9   0  163.78    8.30
  -1   9   0  177.88    8.10
  -1   9   0  186.18    8.80
  -1   9   0  181.28    6.80
  -1   9   0  182.28    8.40
  -1   9   0  170.28    8.30
  -1   9   0  164.08    8.30
  -1   9   0  188.18    7.00
  -1   9   0  180.68    8.20
  -1   9   0  157.78    8.20
  -1   9   0  181.08    7.20
  -1   9   0  203.48    9.40
   0  -9   0   52.79    5.80
   0  -9   0   55.49    6.20
   0  -9   0   52.99    5.90
   0  -9   0   62.99    6.40
   0  -9   0   60.79    4.60
   0  -9   0   57.39    5.70
   0  -9   0   56.09    5.80
   0  -9   0   62.19    4.50
   0  -9   0   48.00    5.20
   0  -9   0   53.69    5.30
   0  -9   0   60.69    5.90
   0  -9   0   61.89    4.70
   0  -9   0   59.89    4.50
   0  -9   0   67.39    4.70
   0  -9   0   57.99    4.30
   0   9   0   66.09    4.30
   0   9   0   60.29    4.90
   0   9   0   60.59    6.40
   0   9   0   57.39    4.40
   0   9   0   68.79    5.10
   0   9   0   55.79    5.50
   0   9   0   69.59    5.10
   0   9   0   68.29    4.90
   0   9   0   68.79    4.70
   0   9   0   56.29    6.10
   0   9   0   64.59    5.00
   0   9   0   53.99    4.00
   0   9   0   66.19    5.40
   0   9   0   60.89    4.80
  -1  -9   0    2.80    2.20
  -1  -9   0    1.80    1.70
  -1  -9   0    5.00    2.10
  -1  -9   0    3.50    2.10
  -1  -9   0    1.90    1.80
  -1  -9   0    0.80    1.50
  -1  -9   0    5.10    2.10
  -1  -9   0    5.90    2.20
  -1  -9   0    2.90    2.00
  -1  -9   0    6.20    2.70
  -1  -9   0    2.00    1.80
  -1  -9   0    2.20    1.80
  -1  -9   0    2.80    2.00
  -1  -9   0    3.20    2.00
   1   9   0    8.00    2.30
   1   9   0    4.00    1.80
   1   9   0    2.40    1.70
   1   9   0    4.00    1.90
   1   9   0    8.80    2.30
   1   9   0    5.60    2.50
   1   9   0    8.80    2.80
   1   9   0    3.80    1.90
   1   9   0    5.50    2.30
   1   9   0    5.40    2.00
   1   9   0    5.60    2.10
   1   9   0    1.70    1.70
   1   9   0    6.00    2.30
   1   9   0    5.10    2.10
   1   9   0    6.00    2.20
   1   9   0    7.10    2.70
  -2  -9   0   28.90    4.60
  -2  -9   0   32.10    4.90
  -2  -9   0   29.20    4.00
  -2  -9   0   27.00    4.10
  -2  -9   0   28.30    3.80
  -2  -9   0   21.70    4.00
  -2  -9   0   22.00    3.50
  -2  -9   0   25.20    3.70
  -2  -9   0   31.20    4.90
  -2  -9   0   28.60    4.40
  -2  -9   0   32.10    4.60
  -2  -9   0   33.50    4.70
  -2  -9   0   29.50    4.60
  -2  -9   0   27.60    4.60
   2   9   0   37.80    5.30
   2   9   0   37.50    5.50
   2   9   0   43.30    4.90
   2   9   0   50.79    5.20
   2   9   0   40.00    4.50
   2   9   0   41.80    5.40
   2   9   0   44.40    5.60
   2   9   0   39.30    4.90
   2   9   0   34.30    4.50
   2   9   0   35.10    4.80
   2   9   0   37.10    5.10
   2   9   0   33.00    4.20
   2   9   0   41.20    4.90
   2   9   0   38.20    4.50
   2   9   0   35.90    4.50
  -3  -9   0   42.20    5.20
  -3  -9   0   38.00    5.30
  -3  -9   0   34.40    4.80
  -3  -9   0   46.50    4.70
  -3  -9   0   44.30    5.70
  -3  -9   0   28.50    4.50
  -3  -9   0   38.30    5.50
  -3  -9   0   40.00    5.40
  -3  -9   0   47.00    5.60
  -3  -9   0   39.30    5.10
  -3  -9   0   41.40    4.60
  -3  -9   0   45.90    4.90
  -3  -9   0   39.70    5.60
  -3  -9   0   40.70    5.10
  -3  -9   0   49.60    6.10
   3   9   0   51.09    5.10
   3   9   0   59.99    6.70
   3   9   0   49.40    6.00
   3   9   0   49.70    5.50
   3   9   0   46.90    6.00
   3   9   0   48.40    5.30
   3   9   0   40.00    5.20
   3   9   0   53.39    5.70
   3   9   0   56.59    6.10
   3   9   0   54.99    6.50
   3   9   0   48.00    5.50
   3   9   0   56.39    5.40
   3   9   0   53.79    5.30
   3   9   0   46.80    5.80
   3   9   0   58.19    6.40
   3   9   0   40.10    5.30
  -4  -9   0   90.69    5.90
  -4  -9   0  108.79    6.30
  -4  -9   0   98.79    7.40
  -4  -9   0  102.09    7.30
  -4  -9   0   90.69    6.70
  -4  -9   0   91.69    7.00
  -4  -9   0  106.49    7.30
  -4  -9   0  100.39    7.30
  -4  -9   0   98.09    7.30
  -4  -9   0   99.29    7.20
  -4  -9   0  105.49    7.10
  -4  -9   0  100.29    7.60
  -4  -9   0  106.89    7.50
  -4  -9   0  109.79    7.90
   4   9   0   82.89    6.20
   4   9   0   92.29    6.50
   4   9   0   95.49    6.20
   4   9   0   99.79    6.60
   4   9   0   94.29    7.00
   4   9   0   95.19    6.50
   4   9   0  104.89    7.30
   4   9   0   84.79    6.50
   4   9   0   79.19    6.60
   4   9   0   94.09    7.40
   4   9   0   91.29    5.50
   4   9   0   83.79    5.40
   4   9   0  102.69    7.20
   4   9   0   84.69    6.60
   4   9   0   81.59    6.60
   4   9   0   83.79    6.50
  -5  -9   0   28.30    5.30
  -5  -9   0   20.70    4.40
  -5  -9   0   20.30    4.30
  -5  -9   0   34.10    5.30
  -5  -9   0   25.00    4.90
  -5  -9   0   20.80    4.70
  -5  -9   0   22.80    4.00
  -5  -9   0   21.90    4.40
  -5  -9   0   28.10    5.00
  -5  -9   0   18.50    4.20
  -5  -9   0   19.90    4.20
  -5  -9   0   18.00    4.20
   5   9   0   20.20    4.20
   5   9   0   20.20    4.70
   5   9   0   17.70    4.20
   5   9   0   14.80    3.80
   5   9   0   20.20    4.20
   5   9   0   11.60    3.70
   5   9   0   19.70    3.70
   5   9   0   20.00    4.10
   5   9   0   19.00    4.50
   5   9   0   22.60    4.80
   5   9   0   20.60    4.50
   5   9   0   20.80    4.60
   5   9   0   19.40    4.30
   5   9   0   22.30    4.60
  -6  -9   0   53.19    6.20
  -6  -9   0   45.30    6.50
  -6  -9   0   46.50    6.50
  -6  -9   0   60.89    6.90
  -6  -9   0   60.39    6.90
  -6  -9   0   47.60    6.20
  -6  -9   0   52.59    6.60
  -6  -9   0   52.59    6.60
  -6  -9   0   68.39    8.20
  -6  -9   0   44.00    6.00
  -6  -9   0   57.89    7.60
  -6  -9   0   46.70    6.50
   6   9   0   46.40    6.70
   6   9   0   47.10    5.60
   6   9   0   47.40    6.60
   6   9   0   49.70    6.40
   6   9   0   48.40    7.00
   6   9   0   62.69    7.60
   6   9   0   58.19    7.60
   6   9   0   43.40    6.60
   6   9   0   62.19    7.70
   6   9   0   62.49    7.00
   6   9   0   60.69    7.50
  -7  -9   0   14.90    3.70
  -7  -9   0   12.50    4.00
  -7  -9   0   27.30    5.60
  -7  -9   0   22.10    4.60
  -7  -9   0   13.70    3.90
  -7  -9   0   20.80    4.60
  -7  -9   0   13.50    4.30
  -7  -9   0   22.00    5.30
  -7  -9   0   21.60    5.30
   7   9   0   21.10    5.10
   7   9   0   19.10    5.00
   7   9   0   13.40    4.20
   7   9   0   14.20    3.40
   7   9   0    9.50    4.10
   7   9   0   15.70    4.70
   7   9   0   22.20    4.90
   7   9   0   15.00    4.30
   7   9   0   22.10    5.10
  -8  -9   0   23.40    4.70
  -8  -9   0   24.50    5.70
  -8  -9   0   20.20    4.80
  -8  -9   0   25.50    5.70
  -8  -9   0   21.50    4.90
  -8  -9   0   20.90    5.30
  -8  -9   0   24.50    5.20
  -8  -9   0   20.30    5.20
  -8  -9   0   17.40    4.50
   8   9   0   36.70    6.60
   8   9   0   19.40    5.10
   8   9   0   23.80    5.60
   8   9   0   24.40    5.90
   8   9   0   22.80    5.10
   8   9   0   25.50    4.60
   8   9   0   32.70    6.30
   8   9   0   23.60    5.50
   8   9   0   22.80    5.70
  -9  -9   0   37.40    6.50
  -9  -9   0   39.60    5.80
  -9  -9   0   40.50    7.00
  -9  -9   0   39.50    6.30
  -9  -9   0   43.00    7.00
  -9  -9   0   42.10    7.20
  -9  -9   0   38.80    6.30
   9   9   0   43.30    5.60
   9   9   0   49.80    8.20
   9   9   0   44.50    7.80
   9   9   0   36.50    6.80
   9   9   0   42.00    7.20
   9   9   0   39.60    7.70
   9   9   0   52.89   12.30
   9   9   0   42.40    7.60
  11 -10   0   63.49    8.40
 -11  10   0   89.59   10.80
 -11  10   0   71.69    9.00
  10 -10   0   22.60    5.30
  10 -10   0   25.60    6.10
  10 -10   0   21.90    5.20
  10 -10   0   23.00    5.30
  10 -10   0   15.70    4.50
  10 -10   0   17.00    3.60
  10 -10   0   13.30    4.10
  10 -10   0   15.30    4.40
 -10  10   0   25.60    6.00
 -10  10   0   27.40    6.20
 -10  10   0   26.90    5.70
 -10  10   0   17.50    3.90
 -10  10   0   18.50    5.00
 -10  10   0   19.90    5.20
   9 -10   0   17.20    4.30
   9 -10   0   25.40    5.40
   9 -10   0   13.60    4.20
   9 -10   0   17.10    4.90
   9 -10   0   19.30    4.80
   9 -10   0   18.20    4.40
   9 -10   0   16.10    3.60
   9 -10   0   14.70    4.60
   9 -10   0   18.90    4.70
  -9  10   0   19.30    4.70
  -9  10   0   17.70    4.20
  -9  10   0   21.70    5.20
  -9  10   0   12.00    4.00
  -9  10   0   20.30    4.80
  -9  10   0   16.50    4.50
  -9  10   0   19.70    4.80
   8 -10   0    7.60    3.10
   8 -10   0    7.30    3.00
   8 -10   0    7.90    3.20
   8 -10   0   14.70    4.40
   8 -10   0   10.30    3.70
   8 -10   0   13.10    4.00
   8 -10   0   14.20    3.80
   8 -10   0    7.90    3.30
   8 -10   0    7.60    2.70
   8 -10   0   10.00    3.30
   8 -10   0    8.80    3.50
  -8  10   0   11.50    3.70
  -8  10   0    7.50    3.20
  -8  10   0    1.40    2.80
  -8  10   0   10.80    3.10
  -8  10   0   14.80    4.40
  -8  10   0   13.10    4.00
  -8  10   0   10.10    3.60
   7 -10   0    8.40    3.20
   7 -10   0   11.00    3.30
   7 -10   0    5.40    3.10
   7 -10   0    9.90    3.00
   7 -10   0   13.10    3.90
   7 -10   0    7.80    2.60
   7 -10   0    8.70    3.30
   7 -10   0    9.70    3.40
   7 -10   0    6.20    3.10
   7 -10   0    8.80    3.50
   7 -10   0   10.50    3.20
  -7  10   0    8.30    3.30
  -7  10   0    3.80    2.70
  -7  10   0    3.60    2.80
  -7  10   0    5.00    2.80
  -7  10   0    3.40    2.70
  -7  10   0    7.00    2.90
  -7  10   0    3.80    2.10
  -7  10   0    2.40    2.30
  -7  10   0    1.50    2.20
   6 -10   0   48.70    5.80
   6 -10   0   55.39    6.20
   6 -10   0   60.59    6.30
   6 -10   0   56.39    6.60
   6 -10   0   54.89    7.00
   6 -10   0   51.59    5.60
   6 -10   0   41.90    6.10
   6 -10   0   56.49    5.70
   6 -10   0   62.39    7.30
   6 -10   0   56.99    7.20
   6 -10   0   54.59    6.80
   6 -10   0   47.50    6.20
   6 -10   0   63.09    7.30
   6 -10   0   55.39    6.70
   6 -10   0   50.99    6.40
  -6  10   0   71.79    7.70
  -6  10   0   54.99    6.60
  -6  10   0   59.19    7.20
  -6  10   0   48.30    6.30
  -6  10   0   63.69    7.20
  -6  10   0   63.69    7.20
  -6  10   0   55.59    6.60
  -6  10   0   51.89    6.80
  -6  10   0   45.80    5.50
  -6  10   0   61.89    6.30
  -6  10   0   69.19    7.30
   5 -10   0   44.20    5.80
   5 -10   0   43.30    5.60
   5 -10   0   39.30    5.80
   5 -10   0   42.20    5.20
   5 -10   0   46.90    5.40
   5 -10   0   39.60    5.30
   5 -10   0   34.80    5.50
   5 -10   0   41.30    5.00
   5 -10   0   52.89    6.30
   5 -10   0   43.30    5.30
   5 -10   0   44.50    5.40
   5 -10   0   47.10    5.60
   5 -10   0   54.69    5.80
   5 -10   0   53.69    6.60
   5 -10   0   38.00    5.40
   5 -10   0   51.09    5.50
   5 -10   0   46.50    6.10
  -5  10   0   61.39    6.90
  -5  10   0   48.10    5.80
  -5  10   0   43.10    5.20
  -5  10   0   56.29    6.20
  -5  10   0   49.50    6.10
  -5  10   0   46.90    6.20
  -5  10   0   60.99    6.90
  -5  10   0   54.19    6.30
  -5  10   0   56.39    5.80
  -5  10   0   54.39    6.40
  -5  10   0   53.29    6.20
   4 -10   0   11.40    3.10
   4 -10   0   17.40    3.70
   4 -10   0   11.70    2.70
   4 -10   0   12.60    3.00
   4 -10   0   13.20    3.50
   4 -10   0   12.00    3.70
   4 -10   0   17.40    3.70
   4 -10   0   13.20    3.30
   4 -10   0   15.00    3.20
   4 -10   0   13.60    3.30
   4 -10   0   11.80    3.00
   4 -10   0   10.30    3.10
   4 -10   0   12.50    3.10
   4 -10   0   17.70    3.60
   4 -10   0   15.70    3.00
   4 -10   0   12.40    3.20
   4 -10   0   11.10    3.10
  -4  10   0   23.30    4.20
  -4  10   0   22.10    4.00
  -4  10   0   24.40    3.90
  -4  10   0   19.70    3.50
  -4  10   0   22.00    3.80
  -4  10   0   27.10    4.70
  -4  10   0   20.60    4.10
  -4  10   0   25.10    4.00
  -4  10   0   29.90    4.70
  -4  10   0   23.00    4.30
  -4  10   0   27.10    4.10
  -4  10   0   22.40    4.00
   3 -10   0  171.98    7.30
   3 -10   0  147.89    8.40
   3 -10   0  160.18    8.60
   3 -10   0  149.19    8.30
   3 -10   0  158.38    8.50
   3 -10   0  146.29    8.20
   3 -10   0  161.88    7.90
   3 -10   0  161.18    8.90
   3 -10   0  168.08    9.10
   3 -10   0  157.48    7.80
   3 -10   0  173.68    9.20
   3 -10   0  158.98    8.10
   3 -10   0  161.28    8.90
   3 -10   0  156.28    8.60
   3 -10   0  153.18    8.50
   3 -10   0  188.08    8.80
  -3  10   0  154.48    8.10
  -3  10   0  140.39    8.20
  -3  10   0  150.78    8.20
  -3  10   0  159.28    8.80
  -3  10   0  149.29    8.00
  -3  10   0  154.58    8.50
  -3  10   0  156.48    8.70
  -3  10   0  161.28    8.10
  -3  10   0  153.18    8.20
  -3  10   0  148.09    7.20
  -3  10   0  151.98    7.40
  -3  10   0  140.09    8.10
   2 -10   0  119.29    7.00
   2 -10   0  100.89    6.50
   2 -10   0  102.19    6.80
   2 -10   0   94.59    5.60
   2 -10   0  100.39    6.90
   2 -10   0  104.19    7.20
   2 -10   0   93.59    6.30
   2 -10   0  102.69    6.70
   2 -10   0  104.59    6.70
   2 -10   0   96.29    6.70
   2 -10   0  112.29    7.10
   2 -10   0  101.19    6.30
   2 -10   0  100.29    7.20
   2 -10   0  100.99    6.70
   2 -10   0  109.59    6.90
  -2  10   0   98.39    6.70
  -2  10   0   95.99    5.30
  -2  10   0   91.59    5.20
  -2  10   0  103.69    6.70
  -2  10   0  104.49    6.60
  -2  10   0  112.59    6.90
  -2  10   0  100.49    6.30
  -2  10   0   88.09    6.50
  -2  10   0   85.09    6.30
  -2  10   0   97.59    6.20
  -2  10   0   99.69    6.90
  -2  10   0   81.49    5.80
  -2  10   0  115.79    7.10
   1 -10   0   -0.30    1.60
   1 -10   0    6.60    2.90
   1 -10   0    1.40    2.30
   1 -10   0    5.30    1.80
   1 -10   0    1.50    2.10
   1 -10   0    4.90    2.30
   1 -10   0    3.00    2.20
   1 -10   0    3.00    1.90
   1 -10   0    5.80    2.30
   1 -10   0    3.60    2.20
   1 -10   0    3.20    2.20
   1 -10   0    6.00    2.40
   1 -10   0    0.80    1.70
   1 -10   0    5.40    2.30
   1 -10   0    5.70    2.50
  -1  10   0    1.80    1.80
  -1  10   0    7.80    2.60
  -1  10   0    2.20    1.90
  -1  10   0    3.90    2.00
  -1  10   0    5.90    2.20
  -1  10   0    5.80    2.40
  -1  10   0   12.00    3.20
  -1  10   0    4.50    2.00
  -1  10   0    4.30    2.40
  -1  10   0    0.40    2.10
  -1  10   0    5.30    2.20
   0 -10   0   42.40    4.70
   0 -10   0   51.39    5.80
   0 -10   0   39.40    4.50
   0 -10   0   42.40    5.80
   0 -10   0   40.30    5.40
   0 -10   0   41.60    4.60
   0 -10   0   43.40    5.00
   0 -10   0   45.40    5.60
   0 -10   0   36.90    4.40
   0 -10   0   35.30    5.30
   0 -10   0   45.30    5.20
   0 -10   0   47.10    5.20
   0 -10   0   44.00    5.60
   0 -10   0   47.10    5.80
   0 -10   0   31.60    4.30
   0  10   0   35.30    4.80
   0  10   0   54.09    6.00
   0  10   0   46.10    5.50
   0  10   0   43.80    5.60
   0  10   0   34.40    4.80
   0  10   0   39.80    4.80
   0  10   0   37.60    4.80
   0  10   0   35.50    4.60
   0  10   0   42.20    5.00
   0  10   0   33.70    4.40
   0  10   0   39.30    5.40
   0  10   0   47.10    6.10
  -1 -10   0   60.79    6.60
  -1 -10   0   58.79    4.50
  -1 -10   0   65.09    7.10
  -1 -10   0   53.59    6.00
  -1 -10   0   63.39    4.70
  -1 -10   0   68.69    7.80
  -1 -10   0   60.69    5.60
  -1 -10   0   58.99    6.10
  -1 -10   0   63.19    6.60
  -1 -10   0   77.39    7.70
  -1 -10   0   54.79    5.70
  -1 -10   0   55.19    6.50
  -1 -10   0   43.70    6.10
  -1 -10   0   63.89    5.00
  -1 -10   0   58.19    6.00
  -1 -10   0   57.99    5.90
  -1 -10   0   59.69    5.90
  -1 -10   0   55.59    6.20
   1  10   0   42.00    5.60
   1  10   0   46.00    5.40
   1  10   0   51.79    6.00
   1  10   0   50.89    6.40
   1  10   0   60.49    6.50
   1  10   0   49.60    5.60
   1  10   0   56.49    5.30
   1  10   0   49.00    5.50
   1  10   0   56.89    4.60
   1  10   0   48.50    5.80
   1  10   0   59.89    5.90
   1  10   0   52.29    5.10
   1  10   0   49.30    6.20
   1  10   0   57.89    5.80
   1  10   0   61.79    6.30
   1  10   0   47.40    6.20
  -2 -10   0   77.29    8.10
  -2 -10   0   69.89    6.90
  -2 -10   0   60.79    6.00
  -2 -10   0   73.69    6.10
  -2 -10   0   63.09    6.90
  -2 -10   0   57.59    5.80
  -2 -10   0   57.69    6.20
  -2 -10   0   56.99    6.60
  -2 -10   0   57.59    6.80
  -2 -10   0   64.29    7.20
  -2 -10   0   59.99    6.40
  -2 -10   0   58.09    5.70
  -2 -10   0   71.29    6.40
  -2 -10   0   66.89    6.60
  -2 -10   0   79.49    6.30
  -2 -10   0   59.69    6.40
   2  10   0   52.19    5.50
   2  10   0   59.29    6.50
   2  10   0   56.19    6.60
   2  10   0   63.19    6.00
   2  10   0   45.40    5.80
   2  10   0   54.69    6.40
   2  10   0   62.29    6.10
   2  10   0   58.49    6.10
   2  10   0   51.59    5.40
   2  10   0   62.39    6.20
   2  10   0   49.00    6.40
   2  10   0   49.70    5.90
   2  10   0   49.90    5.30
   2  10   0   54.69    6.20
   2  10   0   58.99    7.00
  -3 -10   0  110.89    7.60
  -3 -10   0  108.09    8.00
  -3 -10   0  107.89    7.90
  -3 -10   0  111.19   11.20
  -3 -10   0  102.59    6.60
  -3 -10   0   97.09    7.20
  -3 -10   0  109.09    7.50
  -3 -10   0  114.29    7.90
  -3 -10   0  106.79    7.70
  -3 -10   0   94.39    7.20
  -3 -10   0  102.69    6.50
  -3 -10   0   99.59    7.40
  -3 -10   0  107.39    7.80
  -3 -10   0  101.49    7.50
  -3 -10   0   94.09    6.70
   3  10   0  119.89    8.00
   3  10   0  116.29    7.70
   3  10   0  127.29    7.00
   3  10   0  125.39    8.00
   3  10   0  112.09    8.30
   3  10   0  116.49    7.40
   3  10   0  117.29    7.30
   3  10   0  128.39    8.40
   3  10   0  118.09    7.90
   3  10   0  105.69    7.00
   3  10   0  119.59    7.90
   3  10   0  117.29    8.10
   3  10   0  116.59    7.60
   3  10   0  114.59    6.80
   3  10   0  119.59    7.30
   3  10   0  117.59    6.80
  -4 -10   0   25.30    4.80
  -4 -10   0   25.60    4.40
  -4 -10   0   22.60    4.60
  -4 -10   0   26.20    5.10
  -4 -10   0   34.50    4.40
  -4 -10   0   35.60    5.50
  -4 -10   0   35.40    6.10
  -4 -10   0   26.70    5.00
  -4 -10   0   31.10    4.80
  -4 -10   0   29.90    5.10
  -4 -10   0   29.70    4.20
  -4 -10   0   32.30    5.60
  -4 -10   0   21.60    4.50
  -4 -10   0   30.40    5.20
   4  10   0   36.20    4.60
   4  10   0   40.90    4.70
   4  10   0   39.10    5.40
   4  10   0   38.50    5.80
   4  10   0   42.30    5.80
   4  10   0   41.10    5.60
   4  10   0   33.40    5.20
   4  10   0   40.00    5.70
   4  10   0   40.90    5.80
   4  10   0   39.40    6.10
   4  10   0   43.00    6.30
   4  10   0   37.80    6.00
   4  10   0   37.30    5.50
   4  10   0   46.70    6.90
   4  10   0   42.50    6.20
  -5 -10   0   67.69    7.90
  -5 -10   0   88.69    8.90
  -5 -10   0   65.79    7.70
  -5 -10   0   69.39    7.30
  -5 -10   0   62.59    7.70
  -5 -10   0   65.19    7.60
  -5 -10   0   87.69    8.40
  -5 -10   0   56.99    7.10
  -5 -10   0   78.89    8.70
  -5 -10   0   84.99    8.40
  -5 -10   0   73.09    8.30
  -5 -10   0   79.89    8.70
   5  10   0   79.99    8.60
   5  10   0   69.99    8.60
   5  10   0   80.09    8.40
   5  10   0   66.49    8.30
   5  10   0   82.39    8.10
   5  10   0   72.89    8.20
   5  10   0   62.69    7.70
   5  10   0   70.89   10.00
   5  10   0   82.39    6.60
   5  10   0   72.19    8.30
   5  10   0   77.39    8.70
   5  10   0   81.09    8.40
  -6 -10   0   75.99    8.10
  -6 -10   0   88.69    9.20
  -6 -10   0   79.49    8.60
  -6 -10   0   75.09    8.30
  -6 -10   0   85.59    8.90
  -6 -10   0   81.29    9.40
  -6 -10   0  102.69   10.40
  -6 -10   0   69.79    8.10
  -6 -10   0   79.39    8.90
  -6 -10   0   84.89    8.60
  -6 -10   0   87.39    9.10
  -6 -10   0   78.69    8.80
   6  10   0   69.59    7.40
   6  10   0   93.19    9.10
   6  10   0   72.89    8.20
   6  10   0   97.39   10.20
   6  10   0   74.09    9.10
   6  10   0   68.59    8.10
   6  10   0   73.19    8.80
   6  10   0   58.79    8.10
   6  10   0   75.19    9.00
  -7 -10   0   20.10    4.70
  -7 -10   0   32.50    6.20
  -7 -10   0   26.00    5.30
  -7 -10   0   36.00    6.30
  -7 -10   0   25.00    5.40
  -7 -10   0   17.50    4.60
  -7 -10   0   23.10    5.40
  -7 -10   0   20.10    4.30
  -7 -10   0   26.80    5.20
   7  10   0   20.60    5.30
   7  10   0   17.50    4.80
   7  10   0   27.80    5.50
   7  10   0   27.50    6.00
   7  10   0   20.10    4.00
   7  10   0   18.80    4.90
   7  10   0   30.50    6.10
   7  10   0   22.10    5.30
   7  10   0   21.10    5.30
  -8 -10   0   -1.40    2.60
  -8 -10   0    6.70    3.00
  -8 -10   0    9.00    4.30
  -8 -10   0    3.70    3.40
  -8 -10   0    3.50    3.60
  -8 -10   0    2.70    3.10
  -8 -10   0    9.20    4.10
   8  10   0    3.50    3.10
   8  10   0    3.40    3.30
   8  10   0    2.80    3.50
   8  10   0    4.30    2.50
   8  10   0    5.30    3.60
   8  10   0    2.40    3.20
   8  10   0    0.70    3.30
   8  10   0   -0.20    2.70
   8  10   0    5.80    3.70
  10 -11   0   35.00    6.70
  10 -11   0   29.70    6.10
  10 -11   0   29.50    6.20
  10 -11   0   32.90    6.10
  10 -11   0   26.80    5.60
  10 -11   0   26.80    5.50
  10 -11   0   33.00    5.90
 -10  11   0   51.79    7.80
 -10  11   0   38.60    7.10
 -10  11   0   43.70    7.10
 -10  11   0   48.10    6.40
 -10  11   0   46.70    7.30
 -10  11   0   48.40    7.50
   9 -11   0   32.40    6.10
   9 -11   0   26.20    4.40
   9 -11   0   24.10    5.50
   9 -11   0   26.10    5.70
   9 -11   0   27.20    5.40
   9 -11   0   27.90    5.70
   9 -11   0   29.90    5.50
   9 -11   0   32.60    5.80
   9 -11   0   31.30    6.20
  -9  11   0   28.00    5.10
  -9  11   0   38.10    6.80
  -9  11   0   30.40    6.10
  -9  11   0   26.00    5.50
  -9  11   0   22.30    5.30
  -9  11   0   32.20    7.20
  -9  11   0   28.20    5.70
   8 -11   0   45.20    6.80
   8 -11   0   42.40    6.60
   8 -11   0   38.60    5.90
   8 -11   0   32.10    5.50
   8 -11   0   32.90    6.00
   8 -11   0   42.90    5.90
   8 -11   0   50.39    7.20
   8 -11   0   41.10    7.00
   8 -11   0   52.09    6.90
   8 -11   0   37.70    6.40
  -8  11   0   29.20    5.50
  -8  11   0   27.00    5.40
  -8  11   0   24.50    5.10
  -8  11   0   30.40    6.10
  -8  11   0   30.30    5.70
  -8  11   0   39.80    6.50
  -8  11   0   26.60    6.00
  -8  11   0   36.50    6.30
  -8  11   0   33.50    6.00
  -8  11   0   32.70    5.10
   7 -11   0   35.10    5.50
   7 -11   0   49.90    7.10
   7 -11   0   37.80    6.20
   7 -11   0   37.50    5.60
   7 -11   0   42.90    6.30
   7 -11   0   30.10    5.70
   7 -11   0   36.70    6.10
   7 -11   0   40.30    6.00
   7 -11   0   34.30    6.00
   7 -11   0   38.10    5.50
  -7  11   0   40.40    6.30
  -7  11   0   45.40    6.80
  -7  11   0   37.70    5.90
  -7  11   0   43.10    6.50
  -7  11   0   44.00    6.40
  -7  11   0   51.89    6.80
  -7  11   0   43.30    6.30
  -7  11   0   50.79    6.50
  -7  11   0   34.20    5.10
  -7  11   0   39.90    5.90
   6 -11   0   17.70    3.70
   6 -11   0   20.00    4.40
   6 -11   0   20.20    4.60
   6 -11   0   21.80    5.00
   6 -11   0   12.60    3.30
   6 -11   0   15.60    3.70
   6 -11   0   14.60    3.80
   6 -11   0   20.70    4.00
   6 -11   0   17.90    3.90
   6 -11   0   15.60    4.20
   6 -11   0   16.40    4.30
   6 -11   0   18.60    4.20
   6 -11   0   12.60    3.90
  -6  11   0   24.50    4.30
  -6  11   0   18.10    4.50
  -6  11   0   24.50    4.70
  -6  11   0   23.60    4.80
  -6  11   0   26.90    5.20
  -6  11   0   35.40    5.80
  -6  11   0   19.30    4.20
  -6  11   0   23.90    4.90
  -6  11   0   24.00    4.70
  -6  11   0   19.20    4.20
   5 -11   0   28.20    4.20
   5 -11   0   26.80    4.20
   5 -11   0   30.60    5.00
   5 -11   0   22.70    4.60
   5 -11   0   30.80    4.90
   5 -11   0   35.50    5.00
   5 -11   0   22.00    4.50
   5 -11   0   31.60    4.80
   5 -11   0   28.70    4.90
   5 -11   0   33.30    5.80
   5 -11   0   23.80    4.60
   5 -11   0   29.90    4.70
   5 -11   0   26.10    4.90
   5 -11   0   28.50    4.80
   5 -11   0   33.90    5.40
   5 -11   0   29.50    5.30
   5 -11   0   25.00    4.50
  -5  11   0   38.40    5.60
  -5  11   0   27.80    4.90
  -5  11   0   29.90    5.20
  -5  11   0   26.10    4.90
  -5  11   0   32.10    4.80
  -5  11   0   32.30    5.40
  -5  11   0   31.00    4.60
  -5  11   0   31.70    5.10
  -5  11   0   26.40    4.80
  -5  11   0   26.10    4.40
  -5  11   0   30.90    4.70
   4 -11   0    2.50    2.30
   4 -11   0    3.50    2.30
   4 -11   0    6.30    2.80
   4 -11   0    1.70    1.70
   4 -11   0    1.70    2.00
   4 -11   0    1.60    2.10
   4 -11   0    0.90    2.10
   4 -11   0    3.30    2.40
   4 -11   0   -1.10    1.50
   4 -11   0    1.90    2.30
   4 -11   0    4.70    2.70
   4 -11   0    1.30    2.00
   4 -11   0    3.10    2.50
   4 -11   0    3.10    2.30
   4 -11   0    2.50    2.20
   4 -11   0    3.00    2.40
  -4  11   0    2.20    2.00
  -4  11   0    2.80    2.30
  -4  11   0    8.90    3.20
  -4  11   0    1.90    2.00
  -4  11   0    4.80    2.60
  -4  11   0    5.40    2.90
  -4  11   0    2.60    2.20
  -4  11   0    1.90    2.00
  -4  11   0    1.00    1.60
  -4  11   0    0.80    1.80
  -4  11   0    1.30    1.90
   3 -11   0    8.50    3.00
   3 -11   0    7.20    3.10
   3 -11   0    2.30    2.10
   3 -11   0   10.80    3.20
   3 -11   0    9.20    3.00
   3 -11   0    6.30    2.70
   3 -11   0    5.60    2.30
   3 -11   0    7.10    2.90
   3 -11   0    3.00    2.50
   3 -11   0    7.80    3.00
   3 -11   0   11.00    2.90
   3 -11   0    3.60    2.50
   3 -11   0    5.60    2.80
   3 -11   0    8.40    3.10
   3 -11   0    6.80    2.70
  -3  11   0    6.80    2.30
  -3  11   0    3.60    2.40
  -3  11   0    8.90    2.80
  -3  11   0    2.50    2.10
  -3  11   0    5.40    2.20
  -3  11   0    2.80    2.10
  -3  11   0   10.90    3.10
  -3  11   0    5.60    2.80
  -3  11   0    5.00    2.90
  -3  11   0    6.60    2.90
  -3  11   0    4.50    2.20
   2 -11   0  115.59    7.50
   2 -11   0  111.09    7.20
   2 -11   0  105.79    7.50
   2 -11   0  104.19    7.00
   2 -11   0  112.39    7.40
   2 -11   0  116.19    7.30
   2 -11   0  122.39    7.50
   2 -11   0  114.09    7.90
   2 -11   0  107.39    7.80
   2 -11   0  119.99    7.80
   2 -11   0  117.69    7.90
   2 -11   0  110.59    7.60
   2 -11   0   99.99    7.20
  -2  11   0  110.49    7.40
  -2  11   0  116.29    7.10
  -2  11   0   92.99    7.20
  -2  11   0  107.49    7.40
  -2  11   0  118.99    7.70
  -2  11   0  101.99    7.30
  -2  11   0  113.89    7.50
  -2  11   0  105.39    7.30
  -2  11   0  111.09    7.00
  -2  11   0  118.09    7.20
   1 -11   0   58.89    7.00
   1 -11   0   78.99    6.10
   1 -11   0   82.29    5.90
   1 -11   0   88.49    6.90
   1 -11   0   84.49    6.60
   1 -11   0   72.19    7.40
   1 -11   0   81.69    6.30
   1 -11   0   78.89    7.90
   1 -11   0   84.19    6.60
   1 -11   0   88.39    6.40
   1 -11   0   74.99    5.70
   1 -11   0   83.59    6.30
   1 -11   0   74.39    7.40
  -1  11   0   87.09    6.60
  -1  11   0   85.49    6.50
  -1  11   0   75.29    6.00
  -1  11   0   80.69    5.90
  -1  11   0   99.99    7.30
  -1  11   0   75.59    8.20
  -1  11   0   85.39    6.00
  -1  11   0   76.59    7.60
  -1  11   0   76.39    6.20
  -1  11   0   81.29    6.10
  -1  11   0   86.59    6.60
   0 -11   0   48.70    6.20
   0 -11   0   58.39    5.80
   0 -11   0   62.19    6.80
   0 -11   0   61.59    7.30
   0 -11   0   67.49    7.20
   0 -11   0   65.59    5.20
   0 -11   0   71.99    7.10
   0 -11   0   55.09    7.10
   0 -11   0   66.59    6.60
   0 -11   0   70.59    7.50
   0 -11   0   60.39    6.30
   0 -11   0   62.79    5.00
   0 -11   0   70.29    7.20
   0 -11   0   66.59    5.40
   0 -11   0   52.89    6.70
   0  11   0   73.49    7.30
   0  11   0   65.99    7.00
   0  11   0   59.59    6.80
   0  11   0   69.19    7.00
   0  11   0   55.49    6.30
   0  11   0   51.39    5.70
   0  11   0   57.09    6.40
   0  11   0   64.19    7.10
   0  11   0   53.69    6.60
   0  11   0   59.59    6.20
   0  11   0   51.79    6.70
   0  11   0   59.59    6.70
  -1 -11   0  173.98    9.20
  -1 -11   0  186.18   10.20
  -1 -11   0  175.38    9.00
  -1 -11   0  168.78   10.10
  -1 -11   0  168.98    9.90
  -1 -11   0  150.98    9.30
  -1 -11   0  161.78   11.90
  -1 -11   0  158.18    8.80
  -1 -11   0  162.68    9.20
  -1 -11   0  166.08    8.70
  -1 -11   0  160.88    8.70
  -1 -11   0  166.48    9.40
  -1 -11   0  184.08   10.60
   1  11   0  165.48    8.70
   1  11   0  142.59    7.70
   1  11   0  168.48    9.80
   1  11   0  152.88    9.90
   1  11   0  156.38    9.10
   1  11   0  152.88    8.40
   1  11   0  161.08    8.50
   1  11   0  177.38    9.40
   1  11   0  163.18    8.60
   1  11   0  144.89    8.70
   1  11   0  180.48    9.70
   1  11   0  168.18    9.80
   1  11   0  147.99    9.20
  -2 -11   0   29.10    5.30
  -2 -11   0   42.80    5.10
  -2 -11   0   39.40    5.50
  -2 -11   0   26.40    4.90
  -2 -11   0   28.10    4.80
  -2 -11   0   37.90    5.30
  -2 -11   0   30.80    4.90
  -2 -11   0   35.60    5.00
  -2 -11   0   36.80    5.60
  -2 -11   0   28.50    5.10
  -2 -11   0   24.80    4.80
  -2 -11   0   29.90    5.30
  -2 -11   0   39.40    5.70
  -2 -11   0   37.90    5.30
  -2 -11   0   41.40    5.60
  -2 -11   0   33.30    4.80
   2  11   0   37.50    5.20
   2  11   0   26.40    4.50
   2  11   0   37.10    5.90
   2  11   0   35.40    5.90
   2  11   0   27.70    4.70
   2  11   0   29.70    5.00
   2  11   0   29.90    4.90
   2  11   0   21.00    4.00
   2  11   0   42.20    6.00
   2  11   0   33.50    5.00
   2  11   0   35.90    5.20
   2  11   0   24.20    4.70
  -3 -11   0   92.39    9.30
  -3 -11   0  103.89    8.00
  -3 -11   0  102.69    7.90
  -3 -11   0  103.99    6.70
  -3 -11   0   96.09    9.50
  -3 -11   0   96.19    7.30
  -3 -11   0   88.29    8.40
  -3 -11   0   91.89    8.90
  -3 -11   0   83.29    6.70
  -3 -11   0   98.89    6.90
  -3 -11   0  107.09    7.90
  -3 -11   0   80.49    8.60
  -3 -11   0   95.79    9.60
  -3 -11   0   92.39    6.80
  -3 -11   0   87.99    8.40
   3  11   0   78.79    8.90
   3  11   0   81.79    6.50
   3  11   0   71.89    7.70
   3  11   0   76.89    8.20
   3  11   0   80.69    6.10
   3  11   0  101.19    6.60
   3  11   0   81.39    8.40
   3  11   0   83.29    8.50
   3  11   0   81.19    8.50
   3  11   0   88.79    8.80
   3  11   0   91.99    6.80
   3  11   0   90.59    8.70
   3  11   0   79.89    8.50
   3  11   0  100.19    7.10
   3  11   0   96.19    7.40
  -4 -11   0   10.10    3.70
  -4 -11   0   12.50    3.70
  -4 -11   0   13.80    4.00
  -4 -11   0   14.90    4.00
  -4 -11   0   10.70    3.60
  -4 -11   0   20.30    4.90
  -4 -11   0    9.90    3.70
  -4 -11   0   15.80    4.00
  -4 -11   0   11.50    3.90
  -4 -11   0   17.40    4.30
  -4 -11   0    7.50    3.20
  -4 -11   0   14.40    4.10
  -4 -11   0   11.30    3.50
   4  11   0   11.70    3.90
   4  11   0   18.00    4.50
   4  11   0   16.80    4.00
   4  11   0   18.90    4.60
   4  11   0   14.70    4.00
   4  11   0   12.60    4.30
   4  11   0   24.90    5.20
   4  11   0   11.70    3.50
   4  11   0   15.60    3.40
   4  11   0    9.70    3.40
   4  11   0   17.10    4.50
   4  11   0   15.10    3.20
   4  11   0   17.00    4.20
  -5 -11   0    1.00    2.50
  -5 -11   0    0.40    2.40
  -5 -11   0    0.00    2.00
  -5 -11   0    1.30    2.90
  -5 -11   0   -0.10    2.30
  -5 -11   0   -0.50    2.30
  -5 -11   0   -2.60    2.00
  -5 -11   0    3.60    3.10
  -5 -11   0    0.10    2.40
  -5 -11   0   -0.20    2.60
  -5 -11   0   -2.80    2.30
  -5 -11   0   -1.50    2.30
   5  11   0   -1.80    2.10
   5  11   0    0.30    2.40
   5  11   0    0.90    2.40
   5  11   0   -0.40    2.30
   5  11   0   -0.80    2.20
   5  11   0    0.90    2.40
   5  11   0    4.10    2.80
   5  11   0   -1.30    2.10
   5  11   0    0.00    2.60
   5  11   0    1.80    2.30
   5  11   0    2.40    2.60
  -6 -11   0   40.30    6.60
  -6 -11   0   25.90    5.70
  -6 -11   0   36.10    6.20
  -6 -11   0   44.60    7.10
  -6 -11   0   48.50    6.90
  -6 -11   0   33.70    6.10
  -6 -11   0   35.40    6.20
  -6 -11   0   21.30    4.40
  -6 -11   0   28.70    5.90
  -6 -11   0   35.20    6.50
  -6 -11   0   39.60    6.40
  -6 -11   0   35.90    6.30
   6  11   0   21.20    5.20
   6  11   0   26.90    5.60
   6  11   0   30.10    5.10
   6  11   0   40.90    6.90
   6  11   0   25.80    5.60
   6  11   0   25.90    5.80
   6  11   0   27.40    5.90
   6  11   0   33.70    5.80
   6  11   0   28.40    5.80
  -7 -11   0   32.80    6.10
  -7 -11   0   26.30    6.30
  -7 -11   0   36.10    5.90
  -7 -11   0   24.20    5.90
  -7 -11   0   20.30    5.20
  -7 -11   0   36.60    6.30
  -7 -11   0   36.20    6.50
  -7 -11   0   37.50    6.30
  -7 -11   0   19.70    5.40
   7  11   0   25.70    4.80
   7  11   0   29.70    6.00
   7  11   0   35.20    6.60
   7  11   0   23.40    6.00
   7  11   0   22.30    5.10
   7  11   0   18.50    5.40
   7  11   0   17.70    5.00
   7  11   0   23.60    5.60
   7  11   0   45.90    7.70
  -8 -11   0   45.60    6.90
  -8 -11   0   46.00    7.10
  -8 -11   0   42.20    7.60
  -8 -11   0   54.59    9.00
  -8 -11   0   45.80    7.20
  -8 -11   0   36.70    7.00
  -8 -11   0   43.00    7.10
   8  11   0   31.00    6.50
   8  11   0   27.20    6.00
   8  11   0   34.70    6.80
   8  11   0   40.90    7.60
   8  11   0   17.20    5.40
   8  11   0   28.20    6.40
   8  11   0   34.20    7.20
   8  11   0   32.50    6.20
   9 -12   0   13.90    3.80
   9 -12   0    9.40    3.70
   9 -12   0    9.10    4.20
   9 -12   0    9.30    3.90
   9 -12   0    8.40    3.70
   9 -12   0    9.80    4.30
   9 -12   0    8.10    4.10
   9 -12   0    7.70    4.20
  -9  12   0    5.40    3.50
  -9  12   0    3.70    3.40
  -9  12   0   11.00    4.20
  -9  12   0   12.80    4.40
  -9  12   0    5.20    3.80
  -9  12   0   13.50    3.80
  -9  12   0    6.70    3.60
   8 -12   0   47.50    7.00
   8 -12   0   53.89    7.90
   8 -12   0   53.69    7.00
   8 -12   0   54.89    7.90
   8 -12   0   41.20    6.00
   8 -12   0   44.10    6.60
   8 -12   0   49.60    7.80
   8 -12   0   34.60    6.30
   8 -12   0   60.29    8.50
   8 -12   0   38.00    6.50
  -8  12   0   35.40    6.00
  -8  12   0   60.89    8.10
  -8  12   0   55.99    7.60
  -8  12   0   50.49    7.60
  -8  12   0   47.00    6.80
  -8  12   0   60.19    8.10
  -8  12   0   51.29    7.60
  -8  12   0   46.60    7.30
  -8  12   0   41.60    6.00
  -8  12   0   45.80    7.00
   7 -12   0    1.40    2.20
   7 -12   0    4.50    3.30
   7 -12   0    2.80    3.00
   7 -12   0    0.10    2.60
   7 -12   0    5.20    3.10
   7 -12   0    4.80    3.30
   7 -12   0    3.30    2.60
   7 -12   0    4.70    3.00
   7 -12   0    7.60    3.20
   7 -12   0    6.40    3.30
  -7  12   0   15.20    4.40
  -7  12   0   12.60    4.10
  -7  12   0   10.40    3.60
  -7  12   0    9.80    3.50
  -7  12   0    9.90    3.70
  -7  12   0    8.20    3.50
  -7  12   0    6.00    3.30
  -7  12   0    7.00    3.10
  -7  12   0   14.80    4.40
  -7  12   0    7.50    3.90
   6 -12   0   53.79    6.90
   6 -12   0   38.20    5.60
   6 -12   0   32.00    5.80
   6 -12   0   33.60    5.90
   6 -12   0   33.40    5.30
   6 -12   0   37.80    6.40
   6 -12   0   34.10    5.80
   6 -12   0   30.50    5.50
   6 -12   0   37.80    6.20
   6 -12   0   36.30    5.80
   6 -12   0   40.10    5.80
   6 -12   0   40.90    5.40
  -6  12   0   53.69    7.20
  -6  12   0   39.40    6.20
  -6  12   0   45.10    6.70
  -6  12   0   39.60    6.10
  -6  12   0   67.69    8.20
  -6  12   0   48.80    6.70
  -6  12   0   53.09    6.90
  -6  12   0   41.30    5.90
  -6  12   0   52.09    7.20
  -6  12   0   61.29    7.20
   5 -12   0   21.90    4.80
   5 -12   0   15.00    3.70
   5 -12   0   12.20    3.40
   5 -12   0   17.10    4.00
   5 -12   0   18.60    4.10
   5 -12   0   19.10    4.10
   5 -12   0   16.30    4.50
   5 -12   0   15.60    4.20
   5 -12   0    6.80    3.10
   5 -12   0   16.90    4.30
   5 -12   0   13.90    3.70
   5 -12   0   11.90    3.80
   5 -12   0   17.30    4.30
   5 -12   0   14.60    4.50
   5 -12   0   25.90    4.90
  -5  12   0    4.90    2.70
  -5  12   0   11.50    3.40
  -5  12   0    8.40    3.50
  -5  12   0    4.10    2.80
  -5  12   0   12.70    3.90
  -5  12   0    8.50    3.00
  -5  12   0    8.40    3.10
  -5  12   0   14.70    3.80
  -5  12   0    9.60    3.30
  -5  12   0    2.00    2.30
   4 -12   0    7.50    3.10
   4 -12   0    7.00    3.20
   4 -12   0   10.00    3.40
   4 -12   0    4.90    2.60
   4 -12   0    5.60    2.90
   4 -12   0    7.70    3.30
   4 -12   0   11.50    3.70
   4 -12   0    8.90    3.70
   4 -12   0   14.00    4.10
   4 -12   0    5.20    3.00
   4 -12   0   16.40    3.90
   4 -12   0    9.00    3.40
   4 -12   0    7.40    3.60
   4 -12   0    9.20    3.50
   4 -12   0    6.80    2.80
  -4  12   0    8.40    2.90
  -4  12   0    5.80    3.00
  -4  12   0    7.20    3.10
  -4  12   0    6.00    2.90
  -4  12   0    8.90    3.10
  -4  12   0   12.20    3.50
  -4  12   0    8.90    3.40
  -4  12   0   11.00    3.40
   3 -12   0   43.90    6.10
   3 -12   0   41.10    6.00
   3 -12   0   35.00    5.50
   3 -12   0   37.60    5.30
   3 -12   0   46.90    6.60
   3 -12   0   38.80    5.70
   3 -12   0   42.20    6.30
   3 -12   0   41.10    6.20
   3 -12   0   40.00    5.90
   3 -12   0   34.90    5.30
   3 -12   0   49.50    7.40
   3 -12   0   47.60    6.50
   3 -12   0   49.70    6.30
  -3  12   0   38.20    5.70
  -3  12   0   35.30    5.00
  -3  12   0   36.00    5.60
  -3  12   0   38.90    5.50
  -3  12   0   26.80    4.70
  -3  12   0   48.40    6.50
  -3  12   0   34.00    5.70
  -3  12   0   39.90    5.90
  -3  12   0   38.70    5.70
  -3  12   0   38.50    5.50
   2 -12   0   26.70    4.60
   2 -12   0   32.70    5.30
   2 -12   0   21.40    4.30
   2 -12   0   28.50    5.00
   2 -12   0   31.40    5.30
   2 -12   0   30.90    4.90
   2 -12   0   38.40    5.60
   2 -12   0   37.60    5.70
   2 -12   0   31.60    5.50
   2 -12   0   25.90    4.60
   2 -12   0   28.40    5.20
   2 -12   0   38.10    5.70
   2 -12   0   28.10    5.20
  -2  12   0   34.90    5.10
  -2  12   0   27.90    5.30
  -2  12   0   29.60    5.10
  -2  12   0   20.00    4.10
  -2  12   0   31.50    5.20
  -2  12   0   23.80    4.70
  -2  12   0   28.60    5.00
  -2  12   0   37.60    5.80
  -2  12   0   33.40    5.20
  -2  12   0   32.50    4.80
  -2  12   0   40.80    5.90
   1 -12   0   26.60    4.50
   1 -12   0   38.50    6.10
   1 -12   0   34.20    5.20
   1 -12   0   30.50    5.10
   1 -12   0   25.80    4.70
   1 -12   0   30.20    4.90
   1 -12   0   34.60    5.70
   1 -12   0   23.40    4.80
   1 -12   0   30.90    5.60
   1 -12   0   23.50    4.50
   1 -12   0   31.40    4.80
   1 -12   0   26.80    4.70
   1 -12   0   29.60    5.50
  -1  12   0   35.10    6.00
  -1  12   0   30.10    4.70
  -1  12   0   25.40    4.70
  -1  12   0   22.90    4.50
  -1  12   0   39.50    6.10
  -1  12   0   37.50    5.30
  -1  12   0   34.40    5.60
  -1  12   0   29.70    5.00
  -1  12   0   30.40    4.80
  -1  12   0   29.70    4.60
  -1  12   0   36.20    5.40
   0 -12   0   31.70    5.20
   0 -12   0   31.20    5.30
   0 -12   0   21.90    4.20
   0 -12   0   28.10    5.20
   0 -12   0   23.40    4.70
   0 -12   0   39.40    5.70
   0 -12   0   44.70    5.70
   0 -12   0   38.40    5.80
   0 -12   0   25.20    5.00
   0 -12   0   35.00    5.20
   0 -12   0   26.90    5.20
   0  12   0   35.20    5.20
   0  12   0   35.10    5.60
   0  12   0   33.20    5.10
   0  12   0   33.10    5.50
   0  12   0   28.60    5.40
   0  12   0   30.50    5.10
   0  12   0   34.70    5.60
   0  12   0   31.90    4.90
   0  12   0   23.70    4.90
   0  12   0   30.30    5.20
   0  12   0   29.60    4.60
   0  12   0   30.30    4.80
  -1 -12   0   61.79    6.90
  -1 -12   0   58.99    6.60
  -1 -12   0   43.30    5.60
  -1 -12   0   46.70    6.70
  -1 -12   0   49.30    6.40
  -1 -12   0   56.49    7.60
  -1 -12   0   49.80    6.10
  -1 -12   0   44.40    6.50
  -1 -12   0   54.99    6.40
  -1 -12   0   52.59    6.50
  -1 -12   0   42.60    6.70
  -1 -12   0   58.39    7.60
  -1 -12   0   44.30    6.40
   1  12   0   35.00    5.70
   1  12   0   37.70    6.00
   1  12   0   49.90    6.10
   1  12   0   42.60    5.90
   1  12   0   45.20    6.60
   1  12   0   51.09    6.50
   1  12   0   36.30    5.50
   1  12   0   37.40    5.50
   1  12   0   58.79    6.50
   1  12   0   48.50    6.80
   1  12   0   47.10    6.10
  -2 -12   0    5.60    3.00
  -2 -12   0    8.60    3.60
  -2 -12   0    6.00    3.30
  -2 -12   0   10.40    4.00
  -2 -12   0    6.20    2.80
  -2 -12   0    7.10    3.00
  -2 -12   0    7.20    3.00
  -2 -12   0    8.00    3.10
  -2 -12   0    4.20    3.00
  -2 -12   0    2.00    2.50
  -2 -12   0    4.90    2.90
   2  12   0   12.10    5.90
   2  12   0    4.60    2.40
   2  12   0    8.20    3.30
   2  12   0   12.30    3.90
   2  12   0   14.80    4.20
   2  12   0    7.50    3.10
   2  12   0    5.40    2.90
   2  12   0    8.30    3.40
   2  12   0    8.60    3.70
   2  12   0    6.60    3.30
   2  12   0    1.60    2.10
   2  12   0    8.70    3.20
  -3 -12   0   57.39    6.60
  -3 -12   0   64.29    7.70
  -3 -12   0   52.99    7.10
  -3 -12   0   66.49    7.10
  -3 -12   0   58.69    7.10
  -3 -12   0   51.29    7.20
  -3 -12   0   67.39    7.40
  -3 -12   0   52.99    7.40
  -3 -12   0   56.09    6.40
  -3 -12   0   54.09    7.20
  -3 -12   0   64.69    7.80
  -3 -12   0   56.89    7.60
  -3 -12   0   68.89    7.60
  -3 -12   0   49.99    6.80
  -3 -12   0   53.59    7.60
   3  12   0   43.50    6.50
   3  12   0   37.00    5.80
   3  12   0   58.89    7.60
   3  12   0   28.40    5.60
   3  12   0   61.19    6.60
   3  12   0   50.59    5.80
   3  12   0   55.19    7.50
   3  12   0   56.29    7.50
   3  12   0   56.19    7.30
   3  12   0   54.49    6.90
   3  12   0   47.30    6.90
  -4 -12   0   30.20    5.70
  -4 -12   0   22.00    5.10
  -4 -12   0   23.30    4.90
  -4 -12   0   24.40    5.60
  -4 -12   0   26.30    5.50
  -4 -12   0   23.20    5.30
  -4 -12   0   16.10    4.40
  -4 -12   0   30.90    5.60
  -4 -12   0   23.10    5.10
  -4 -12   0   26.60    5.60
  -4 -12   0   27.60    5.20
  -4 -12   0   28.50    5.70
   4  12   0   11.60    4.30
   4  12   0   19.90    4.80
   4  12   0   27.60    5.10
   4  12   0   21.50    5.10
   4  12   0   20.70    4.80
   4  12   0   13.00    4.20
   4  12   0   14.50    4.30
   4  12   0   24.80    5.50
   4  12   0   22.80    4.10
   4  12   0   25.10    5.20
   4  12   0   24.60    4.40
  -5 -12   0    0.80    3.00
  -5 -12   0   -0.10    2.60
  -5 -12   0    2.40    2.70
  -5 -12   0    4.20    3.30
  -5 -12   0    8.70    3.90
  -5 -12   0   -0.90    2.30
  -5 -12   0    4.50    3.00
  -5 -12   0    0.40    2.70
  -5 -12   0    1.00    2.70
  -5 -12   0    1.60    2.50
  -5 -12   0    2.50    3.00
  -5 -12   0    3.50    3.30
   5  12   0   -0.30    2.70
   5  12   0   -1.80    2.10
   5  12   0    7.70    3.90
   5  12   0    2.00    2.80
   5  12   0    1.20    2.50
   5  12   0    5.90    3.10
   5  12   0    0.50    2.90
   5  12   0    2.40    3.00
   5  12   0    4.90    3.20
   5  12   0    4.90    3.20
  -6 -12   0    2.60    3.40
  -6 -12   0    0.40    3.00
  -6 -12   0    2.00    3.60
  -6 -12   0    2.20    2.90
  -6 -12   0    1.80    3.20
  -6 -12   0    0.30    2.80
  -6 -12   0   -1.30    2.90
  -6 -12   0    6.60    3.60
  -6 -12   0    1.70    3.10
  -6 -12   0    0.10    2.60
  -6 -12   0    4.30    3.70
   6  12   0   -0.40    2.30
   6  12   0    5.40    3.40
   6  12   0   -1.80    2.20
   6  12   0   -0.40    3.20
   6  12   0    2.20    3.20
   6  12   0    0.40    3.20
   6  12   0    0.30    2.50
   6  12   0   -1.20    2.60
  -7 -12   0    0.70    3.60
  -7 -12   0   -1.70    2.90
  -7 -12   0   -2.00    3.00
  -7 -12   0   -1.50    3.10
  -7 -12   0    0.30    3.30
  -7 -12   0    2.40    3.30
  -7 -12   0    1.70    3.20
   7  12   0   -0.90    3.10
   7  12   0    0.30    3.00
   7  12   0    5.40    3.70
   7  12   0    1.60    3.10
   7  12   0    1.30    3.30
   7  12   0    3.50    3.70
   7  12   0    0.80    3.10
   8 -13   0   12.30    4.40
   8 -13   0   10.50    4.50
   8 -13   0   13.50    4.90
   8 -13   0   13.40    4.00
   8 -13   0   14.40    4.70
   8 -13   0    6.30    3.20
   8 -13   0    9.10    3.70
   8 -13   0   12.50    4.70
  -8  13   0    8.20    4.00
  -8  13   0    4.90    3.70
  -8  13   0    8.70    4.10
  -8  13   0    9.90    3.90
  -8  13   0   12.00    4.40
  -8  13   0    8.10    3.20
  -8  13   0   20.10    5.30
  -8  13   0   10.60    4.20
  -8  13   0    9.20    3.90
   7 -13   0    3.20    3.20
   7 -13   0    2.00    3.00
   7 -13   0   -0.10    2.80
   7 -13   0    0.00    2.70
   7 -13   0   -0.40    2.40
   7 -13   0    0.90    2.30
   7 -13   0    6.20    3.60
   7 -13   0    2.30    3.00
  -7  13   0    1.70    2.40
  -7  13   0    1.90    2.50
  -7  13   0    1.90    3.00
  -7  13   0    0.90    2.70
  -7  13   0    1.00    2.70
  -7  13   0    0.70    2.70
  -7  13   0    0.30    2.90
  -7  13   0    6.40    3.70
  -7  13   0    1.90    2.90
  -7  13   0    0.30    2.70
   6 -13   0    4.90    3.40
   6 -13   0    8.10    3.90
   6 -13   0    1.50    3.00
   6 -13   0    9.90    4.00
   6 -13   0    8.10    3.30
   6 -13   0    6.90    3.00
   6 -13   0    7.90    3.70
   6 -13   0    5.80    3.40
   6 -13   0    3.40    3.50
  -6  13   0    4.20    3.00
  -6  13   0    9.30    4.80
  -6  13   0    8.10    4.00
  -6  13   0    4.90    3.60
  -6  13   0    6.50    3.40
  -6  13   0    8.30    4.40
  -6  13   0    2.50    2.80
  -6  13   0    3.70    2.80
  -6  13   0    4.00    2.70
   5 -13   0   24.40    5.20
   5 -13   0   17.90    4.30
   5 -13   0   23.70    4.90
   5 -13   0   19.00    4.40
   5 -13   0   21.50    4.70
   5 -13   0   27.90    5.40
   5 -13   0   23.50    5.40
   5 -13   0   31.70    6.10
   5 -13   0   21.80    4.80
   5 -13   0   23.30    4.90
   5 -13   0   17.10    4.00
   5 -13   0   27.40    5.30
   5 -13   0   14.60    3.90
   5 -13   0   21.90    5.10
  -5  13   0   29.80    5.50
  -5  13   0   38.40    6.50
  -5  13   0   22.90    4.70
  -5  13   0   29.00    5.30
  -5  13   0   31.00    5.70
  -5  13   0   40.20    6.80
  -5  13   0   36.30    5.90
   4 -13   0   10.90    3.70
   4 -13   0   20.50    4.60
   4 -13   0   17.30    4.60
   4 -13   0   14.90    4.00
   4 -13   0   20.00    4.80
   4 -13   0   27.40    5.30
   4 -13   0   15.50    4.30
   4 -13   0   15.50    4.10
   4 -13   0   20.10    4.70
   4 -13   0   17.20    4.70
   4 -13   0   17.70    4.10
   4 -13   0   14.80    4.10
   4 -13   0   23.90    5.00
  -4  13   0   22.30    4.80
  -4  13   0   28.20    5.60
  -4  13   0   21.60    4.80
  -4  13   0   29.50    5.20
  -4  13   0   19.50    4.50
  -4  13   0   22.70    5.00
  -4  13   0   23.10    4.60
  -4  13   0   26.40    5.10
   3 -13   0   65.69    8.20
   3 -13   0   63.49    7.50
   3 -13   0   47.70    6.90
   3 -13   0   56.39    6.90
   3 -13   0   49.70    6.80
   3 -13   0   57.99    7.50
   3 -13   0   52.99    6.80
   3 -13   0   48.20    6.70
   3 -13   0   58.69    7.30
   3 -13   0   54.79    7.20
   3 -13   0   59.09    7.30
  -3  13   0   44.80    6.30
  -3  13   0   45.40    6.60
  -3  13   0   47.60    6.70
  -3  13   0   32.90    5.50
  -3  13   0   43.60    6.10
  -3  13   0   53.89    7.10
  -3  13   0   33.60    6.00
  -3  13   0   38.40    5.90
  -3  13   0   40.60    5.90
   2 -13   0   41.80    6.00
   2 -13   0   40.70    6.00
   2 -13   0   24.90    5.30
   2 -13   0   32.00    5.70
   2 -13   0   31.20    5.30
   2 -13   0   36.20    5.90
   2 -13   0   41.50    6.40
   2 -13   0   26.10    5.10
   2 -13   0   25.80    5.10
   2 -13   0   25.60    4.90
   2 -13   0   32.20    5.20
   2 -13   0   26.20    4.90
   2 -13   0   47.20    7.00
  -2  13   0   38.50    6.40
  -2  13   0   35.10    5.90
  -2  13   0   39.70    6.00
  -2  13   0   35.00    5.40
  -2  13   0   35.00    6.40
  -2  13   0   35.90    6.00
  -2  13   0   48.80    6.50
  -2  13   0   53.89    7.10
  -2  13   0   42.50    6.50
  -2  13   0   39.70    5.70
  -2  13   0   38.10    6.30
   1 -13   0   14.50    4.30
   1 -13   0   22.80    4.80
   1 -13   0    8.30    3.30
   1 -13   0   20.20    4.90
   1 -13   0   23.00    4.90
   1 -13   0   19.10    4.50
   1 -13   0   18.60    4.30
   1 -13   0   22.30    4.50
   1 -13   0   17.90    4.70
   1 -13   0   16.00    4.10
   1 -13   0   18.50    4.60
  -1  13   0   15.10    4.00
  -1  13   0    8.20    3.50
  -1  13   0   12.00    3.70
  -1  13   0    4.70    2.70
  -1  13   0   10.60    3.30
  -1  13   0   13.80    3.70
  -1  13   0   14.40    3.60
  -1  13   0    8.80    3.20
  -1  13   0   11.30    4.00
  -1  13   0   13.70    4.10
  -1  13   0   12.10    3.70
  -1  13   0   16.70    4.40
   0 -13   0   19.00    4.70
   0 -13   0   27.60    4.90
   0 -13   0   22.60    4.80
   0 -13   0   12.70    3.70
   0 -13   0   24.30    5.00
   0 -13   0   21.50    4.90
   0 -13   0   23.20    4.80
   0 -13   0   18.40    4.50
   0 -13   0   22.50    4.70
   0 -13   0   16.50    4.40
   0 -13   0   11.30    4.00
   0  13   0   17.30    4.20
   0  13   0   13.70    3.70
   0  13   0   18.30    4.30
   0  13   0   12.00    4.10
   0  13   0   17.90    4.90
   0  13   0   19.20    4.20
   0  13   0   14.30    3.90
   0  13   0   15.90    3.70
   0  13   0   11.40    3.60
   0  13   0   20.10    4.90
   0  13   0   17.60    4.60
   0  13   0   15.20    4.00
  -1 -13   0    2.30    2.70
  -1 -13   0    2.40    2.50
  -1 -13   0    3.10    3.00
  -1 -13   0    2.90    2.70
  -1 -13   0    0.50    2.50
  -1 -13   0    4.20    3.30
  -1 -13   0    2.20    2.90
  -1 -13   0    0.20    3.00
  -1 -13   0    5.00    2.80
  -1 -13   0    2.90    2.60
  -1 -13   0    0.60    2.30
  -1 -13   0    3.60    2.80
   1  13   0    2.60    2.80
   1  13   0    1.40    2.20
   1  13   0    4.90    3.10
   1  13   0   -2.80    2.40
   1  13   0    2.80    2.50
   1  13   0    4.60    3.20
   1  13   0    1.20    2.10
   1  13   0    5.60    3.10
   1  13   0    2.20    2.50
  -2 -13   0   84.49    9.70
  -2 -13   0   72.69    7.80
  -2 -13   0   70.39    7.50
  -2 -13   0   83.89    9.80
  -2 -13   0   74.99    9.30
  -2 -13   0   78.49    8.20
  -2 -13   0   66.39    7.80
  -2 -13   0   66.99    8.20
  -2 -13   0   90.59   10.30
  -2 -13   0   79.19    8.50
  -2 -13   0   72.19    8.70
  -2 -13   0   81.19    9.10
   2  13   0   68.49    8.10
   2  13   0   61.39    7.90
   2  13   0   77.49    8.10
   2  13   0   57.09    7.90
   2  13   0   64.29    7.50
   2  13   0   69.89    8.20
   2  13   0   72.79    8.90
   2  13   0   61.39    7.50
   2  13   0   64.69    7.10
  -3 -13   0   31.80    5.50
  -3 -13   0   29.20    5.60
  -3 -13   0   43.30    6.40
  -3 -13   0   39.00    6.60
  -3 -13   0   28.70    6.20
  -3 -13   0   30.70    5.80
  -3 -13   0   33.00    6.30
  -3 -13   0   21.90    5.40
  -3 -13   0   21.40    5.00
  -3 -13   0   27.10    5.80
   3  13   0   28.60    5.90
   3  13   0   36.60    6.30
   3  13   0   39.40    7.10
   3  13   0   31.40    5.50
   3  13   0   30.20    5.80
   3  13   0   38.00    6.20
   3  13   0   31.00    6.00
   3  13   0   44.10    5.70
   3  13   0   48.10    6.10
   3  13   0   56.59    8.40
   3  13   0   34.90    6.20
  -4 -13   0    5.20    3.20
  -4 -13   0   -0.80    2.50
  -4 -13   0    4.40    3.40
  -4 -13   0    1.30    2.90
  -4 -13   0    1.70    3.10
  -4 -13   0    1.70    3.10
  -4 -13   0    0.40    2.90
  -4 -13   0    4.60    3.50
   4  13   0   -1.10    2.10
   4  13   0    1.10    2.80
   4  13   0    5.40    3.60
   4  13   0   -1.40    2.50
   4  13   0   -0.90    2.30
   4  13   0   -1.10    2.70
   4  13   0   -1.80    2.40
   4  13   0   -1.60    2.20
   4  13   0    3.00    3.00
  -5 -13   0   -4.00    2.40
  -5 -13   0   -2.30    2.30
  -5 -13   0    1.40    3.20
  -5 -13   0    4.50    3.70
  -5 -13   0    4.70    3.50
  -5 -13   0   -1.40    2.80
  -5 -13   0    2.70    3.20
  -5 -13   0    0.70    3.10
  -5 -13   0    0.60    2.90
  -5 -13   0   -0.90    2.70
  -5 -13   0   -1.50    4.60
   5  13   0    4.10    3.40
   5  13   0    1.00    3.00
   5  13   0    0.90    2.90
   5  13   0    0.30    2.90
   5  13   0    0.60    2.90
   5  13   0    0.40    3.00
   5  13   0    0.30    2.70
   5  13   0   -1.20    2.70
   5  13   0    0.00    2.90
   7 -14   0   35.20    6.80
   7 -14   0   31.60    6.20
   7 -14   0   27.70    5.80
   7 -14   0   33.70    6.70
   7 -14   0   32.60    6.30
  -7  14   0   26.50    6.00
  -7  14   0   22.60    5.40
  -7  14   0   24.80    5.60
  -7  14   0   33.70    6.50
  -7  14   0   33.00    6.30
  -7  14   0   33.40    6.10
   6 -14   0   24.60    5.50
   6 -14   0   33.30    6.90
   6 -14   0   29.60    6.20
   6 -14   0   25.30    5.90
   6 -14   0   19.40    5.40
   6 -14   0   27.70    5.40
   6 -14   0   27.30    6.00
  -6  14   0   19.50    4.90
  -6  14   0   17.40    4.90
  -6  14   0   17.30    4.80
  -6  14   0   18.80    4.80
  -6  14   0   21.30    5.50
  -6  14   0   23.30    5.50
   5 -14   0   -0.60    2.40
   5 -14   0   -4.80    2.20
   5 -14   0    4.40    3.10
   5 -14   0   -0.10    2.50
   5 -14   0    1.80    2.80
   5 -14   0    7.30    3.60
   5 -14   0   -3.20    2.10
   5 -14   0    3.30    3.20
  -5  14   0    2.50    3.00
  -5  14   0    0.40    3.00
  -5  14   0    1.10    3.00
  -5  14   0   -1.10    2.30
  -5  14   0    1.40    2.80
  -5  14   0   -2.50    2.00
  -5  14   0    2.30    2.70
  -5  14   0   -1.80    2.30
   4 -14   0    7.50    3.50
   4 -14   0    8.20    3.90
   4 -14   0    1.70    2.90
   4 -14   0    6.40    4.00
   4 -14   0   12.00    4.20
   4 -14   0   14.00    4.60
   4 -14   0   11.60    4.20
   4 -14   0   10.10    4.00
   4 -14   0   10.20    4.00
   4 -14   0    1.00    2.70
   4 -14   0    7.90    3.50
   4 -14   0    5.50    3.20
   4 -14   0   11.00    3.80
  -4  14   0   14.50    4.40
  -4  14   0    5.80    3.50
  -4  14   0    6.30    3.10
  -4  14   0    8.70    3.60
  -4  14   0   10.90    3.70
  -4  14   0   13.60    4.30
  -4  14   0    7.20    3.80
  -4  14   0    8.40    3.70
  -4  14   0    8.60    3.60
   3 -14   0   22.40    5.20
   3 -14   0   27.90    5.20
   3 -14   0   28.00    5.40
   3 -14   0   30.10    5.80
   3 -14   0   34.10    5.80
   3 -14   0   27.90    5.60
   3 -14   0   32.60    6.00
   3 -14   0   26.40    5.40
   3 -14   0   24.70    5.50
   3 -14   0   33.70    5.80
   3 -14   0   31.30    5.70
   3 -14   0   37.40    6.10
  -3  14   0   33.10    5.90
  -3  14   0   30.00    6.10
  -3  14   0   26.70    5.30
  -3  14   0   22.40    4.90
  -3  14   0   31.20    5.90
  -3  14   0   31.40    5.50
  -3  14   0   26.90    5.50
  -3  14   0   23.00    5.10
  -3  14   0   34.20    6.00
   2 -14   0    6.90    3.60
   2 -14   0   21.30    5.10
   2 -14   0   19.30    4.70
   2 -14   0   15.20    4.30
   2 -14   0   12.60    4.00
   2 -14   0    8.20    3.60
   2 -14   0   19.40    5.20
   2 -14   0   10.60    4.00
   2 -14   0   11.70    3.80
   2 -14   0   10.90    4.20
   2 -14   0   19.90    5.30
  -2  14   0   10.70    3.90
  -2  14   0   18.60    4.60
  -2  14   0   20.50    4.60
  -2  14   0   27.80    5.20
  -2  14   0   22.30    5.20
  -2  14   0   14.80    4.20
  -2  14   0   18.30    4.90
  -2  14   0   12.60    3.90
  -2  14   0   22.60    5.50
  -2  14   0    9.10    3.60
   1 -14   0    0.20    2.50
   1 -14   0    1.90    2.60
   1 -14   0    3.00    3.40
   1 -14   0   -3.60    2.20
   1 -14   0   -0.60    2.40
   1 -14   0   -1.70    2.20
   1 -14   0    2.00    2.70
   1 -14   0   -1.90    2.20
   1 -14   0   -4.40    2.00
   1 -14   0    0.80    2.30
   1 -14   0    1.50    2.80
  -1  14   0    3.10    2.80
  -1  14   0   -2.20    2.10
  -1  14   0   -2.20    1.80
  -1  14   0   -0.50    2.30
  -1  14   0   10.80    3.60
  -1  14   0   -0.60    2.20
  -1  14   0   -0.10    2.50
  -1  14   0   -3.00    2.20
  -1  14   0   -1.10    2.40
  -1  14   0   -0.90    2.00
  -1  14   0   -1.90    2.50
   0 -14   0    1.80    2.50
   0 -14   0    2.00    3.10
   0 -14   0    0.30    2.80
   0 -14   0   -0.10    2.60
   0 -14   0    3.00    2.60
   0 -14   0    3.70    3.00
   0 -14   0    3.50    3.00
   0 -14   0    0.00    2.30
   0 -14   0    3.00    2.80
   0 -14   0    2.20    2.80
   0 -14   0    0.60    2.50
   0  14   0    3.00    2.90
   0  14   0   -0.90    2.00
   0  14   0    1.80    2.30
   0  14   0    4.70    3.20
   0  14   0    4.30    2.70
   0  14   0    1.80    2.80
   0  14   0    2.30    2.70
   0  14   0    3.20    2.90
   0  14   0    0.90    2.90
  -1 -14   0   21.30    5.10
  -1 -14   0   19.80    4.90
  -1 -14   0   15.70    4.80
  -1 -14   0   11.90    3.70
  -1 -14   0   14.90    4.70
  -1 -14   0   12.70    3.90
  -1 -14   0    9.20    3.90
  -1 -14   0   21.70    5.80
  -1 -14   0   11.80    4.60
  -1 -14   0   15.00    4.80
   1  14   0   12.80    4.10
   1  14   0   14.30    4.00
   1  14   0   11.10    3.80
   1  14   0    7.90    4.10
   1  14   0   19.10    5.00
   1  14   0   12.70    4.40
   1  14   0    7.20    3.80
   1  14   0   17.20    4.20
   1  14   0   10.30    3.90
  -2 -14   0   38.50    6.20
  -2 -14   0   30.20    6.40
  -2 -14   0   43.80    7.10
  -2 -14   0   24.20    6.10
  -2 -14   0   26.20    5.80
  -2 -14   0   32.90    6.40
  -2 -14   0   31.10    5.40
  -2 -14   0   34.10    6.60
  -2 -14   0   30.90    6.20
  -2 -14   0   33.10    6.20
   2  14   0   33.80    5.60
   2  14   0   26.20    5.60
   2  14   0   23.80    5.20
   2  14   0   24.00    5.50
   2  14   0   25.40    5.30
   2  14   0   22.60    5.50
   2  14   0   23.50    4.70
   2  14   0   26.80    5.70
   2  14   0   26.40    6.00
  -3 -14   0   14.30    4.90
  -3 -14   0    7.40    3.90
  -3 -14   0    5.60    3.30
  -3 -14   0    8.30    3.70
  -3 -14   0   16.20    4.80
  -3 -14   0   13.70    4.80
  -3 -14   0   15.30    5.10
  -3 -14   0   14.30    5.00
  -3 -14   0   12.70    4.30
   3  14   0   14.40    4.60
   3  14   0   10.20    4.70
   3  14   0   12.60    4.60
   3  14   0   15.40    5.20
   3  14   0   14.80    4.60
   3  14   0   19.90    5.30
   3  14   0   14.20    4.60
   3  14   0   13.30    3.60
   3  14   0   14.30    4.70
   3  14   0   18.30    4.30
  -4 -14   0   -1.80    2.90
  -4 -14   0    2.20    3.30
  -4 -14   0    1.80    3.10
  -4 -14   0    5.90    3.80
  -4 -14   0   -0.20    3.40
  -4 -14   0   -0.80    3.00
  -4 -14   0    2.30    3.70
  -4 -14   0    2.00    3.30
   4  14   0    7.20    4.10
   4  14   0   -1.00    2.50
   4  14   0    0.10    2.80
   4  14   0    0.60    2.90
   4  14   0   -3.00    2.60
   4  14   0   -0.10    3.00
   4  14   0    4.40    3.50
   4  14   0    4.30    3.40
   4  14   0    3.30    3.30
   4 -15   0   15.90    4.70
   4 -15   0   14.90    4.60
   4 -15   0   10.50    4.20
   4 -15   0   14.20    4.70
   4 -15   0   18.70    4.90
   4 -15   0   14.80    4.60
   4 -15   0    8.30    4.10
   4 -15   0   16.10    4.80
   4 -15   0   17.10    4.80
   4 -15   0   23.00    5.50
   4 -15   0   17.60    4.90
   4 -15   0   20.70    5.10
  -4  15   0   17.70    4.90
  -4  15   0   28.20    6.10
  -4  15   0   15.10    4.40
  -4  15   0   23.50    5.50
  -4  15   0   14.90    4.60
  -4  15   0   20.60    5.30
  -4  15   0   23.30    5.90
  -4  15   0   16.10    4.90
   3 -15   0    5.80    3.80
   3 -15   0    1.70    2.90
   3 -15   0    9.90    4.40
   3 -15   0    4.20    3.20
   3 -15   0    5.30    3.90
   3 -15   0    9.50    4.00
   3 -15   0    8.00    3.80
   3 -15   0    6.90    4.10
   3 -15   0    4.00    3.30
  -3  15   0    4.60    3.50
  -3  15   0    8.50    4.00
  -3  15   0    7.30    3.80
  -3  15   0    9.50    4.10
  -3  15   0   11.00    4.30
  -3  15   0   11.20    4.20
  -3  15   0    3.90    3.20
  -3  15   0    8.00    3.70
   2 -15   0   18.10    5.10
   2 -15   0   10.80    4.40
   2 -15   0   19.80    4.90
   2 -15   0   15.20    4.60
   2 -15   0   13.70    4.70
   2 -15   0   18.80    4.70
   2 -15   0   25.10    5.50
   2 -15   0   15.80    4.90
   2 -15   0   11.00    4.30
  -2  15   0   15.10    4.40
  -2  15   0   14.30    4.60
  -2  15   0   15.50    4.70
  -2  15   0   15.80    4.60
  -2  15   0   13.60    4.60
  -2  15   0   13.20    4.20
  -2  15   0   13.80    4.20
  -2  15   0   12.80    6.90
  -2  15   0   11.50    4.00
   1 -15   0    8.40    4.10
   1 -15   0    5.90    3.80
   1 -15   0    5.60    3.70
   1 -15   0   16.60    4.60
   1 -15   0    6.50    3.80
   1 -15   0    8.90    4.10
   1 -15   0    5.00    3.30
   1 -15   0    6.70    4.00
   1 -15   0    6.30    3.70
   1 -15   0    8.50    4.00
  -1  15   0    4.30    3.50
  -1  15   0    7.00    3.80
  -1  15   0    7.60    3.60
  -1  15   0    6.60    3.70
  -1  15   0    6.10    3.90
  -1  15   0    6.30    3.40
  -1  15   0    1.30    3.00
  -1  15   0    2.50    2.70
  -1  15   0    9.70    4.30
   0 -15   0    8.30    4.00
   0 -15   0    0.70    3.40
   0 -15   0    4.00    3.70
   0 -15   0    4.70    3.60
   0 -15   0    7.20    4.00
   0 -15   0    9.60    4.10
   0 -15   0    3.30    3.00
   0 -15   0    3.50    3.00
   0 -15   0    4.30    3.30
   0  15   0    3.10    3.00
   0  15   0    3.50    3.30
   0  15   0    4.80    3.00
   0  15   0    3.90    3.30
   0  15   0    4.30    3.50
   0  15   0    5.90    3.10
   0  15   0    3.10    3.20
   0  15   0    2.80    3.50
   0  15   0    7.80    4.10
  -1 -15   0   17.20    4.70
  -1 -15   0   13.10    4.40
  -1 -15   0   13.40    4.70
  -1 -15   0   13.80    4.50
  -1 -15   0   17.30    4.90
  -1 -15   0   25.10    6.30
  -1 -15   0   19.50    5.40
  -1 -15   0   16.90    5.40
  -1 -15   0   24.80    6.10
   1  15   0   17.20    5.30
   1  15   0   13.40    4.30
   1  15   0   16.30    4.60
   1  15   0   20.30    5.40
   1  15   0   17.00    4.80
   1  15   0   18.90    5.20
   1  15   0   12.50    4.30
   1  15   0   13.20    4.50
   1  15   0   20.30    5.60
   2  15  -1    2.30    3.30
   2  15  -1    6.90    3.80
   2  15  -1    6.60    3.40
   2  15  -1    4.30    3.50
   2  15  -1    4.30    3.40
   2  15  -1    8.40    4.40
   2  15  -1    3.70    3.70
   2  15  -1    4.90    3.60
   2  15  -1    9.30    3.40
   2  15  -1    7.40    3.40
  -2 -15   1   13.10    4.70
  -2 -15   1    5.40    3.80
  -2 -15   1   10.00    4.40
  -2 -15   1    9.70    4.20
  -2 -15   1   11.80    4.40
  -2 -15   1    3.10    3.60
  -2 -15   1   12.30    4.80
  -2 -15   1    7.40    3.80
   1  15  -1    8.20    3.60
   1  15  -1   13.90    4.50
   1  15  -1   11.70    3.90
   1  15  -1    9.60    3.70
   1  15  -1   11.20    4.40
   1  15  -1   12.70    4.40
   1  15  -1    8.70    4.40
   1  15  -1   10.20    4.30
   1  15  -1   12.30    4.60
  -1 -15   1    8.70    4.40
  -1 -15   1    5.00    4.40
  -1 -15   1   10.50    4.20
  -1 -15   1    6.40    3.80
  -1 -15   1   18.50    5.00
  -1 -15   1    7.20    4.10
  -1 -15   1   10.20    4.50
  -1 -15   1   17.40    5.00
  -1 -15   1    8.90    4.30
   0  15  -1   11.90    4.40
   0  15  -1    9.60    3.80
   0  15  -1    7.30    3.70
   0  15  -1   13.00    3.90
   0  15  -1   11.80    4.40
   0  15  -1    9.30    3.60
   0  15  -1    5.00    3.70
   0  15  -1   11.80    4.50
   0  15  -1    5.90    3.90
   0 -15   1   15.60    4.80
   0 -15   1   14.40    4.60
   0 -15   1    9.10    4.40
   0 -15   1   15.90    5.20
   0 -15   1    4.50    3.30
   0 -15   1    7.90    3.60
   0 -15   1   14.20    4.60
   0 -15   1    9.40    4.40
   0 -15   1   20.80    5.20
  -1  15  -1   16.60    4.90
  -1  15  -1    8.20    3.90
  -1  15  -1   12.40    4.10
  -1  15  -1    6.20    3.30
  -1  15  -1   11.10    4.40
  -1  15  -1   15.80    4.60
  -1  15  -1   12.20    4.50
  -1  15  -1    5.40    3.60
  -1  15  -1   15.30    4.50
   1 -15   1   11.30    4.10
   1 -15   1    9.70    4.10
   1 -15   1   11.70    4.20
   1 -15   1    7.60    3.60
   1 -15   1    6.90    4.00
   1 -15   1    4.20    3.30
   1 -15   1    7.70    3.80
   1 -15   1   10.80    3.90
   1 -15   1    9.30    4.10
   1 -15   1    5.60    3.40
  -2  15  -1   17.80    4.60
  -2  15  -1   40.70    6.50
  -2  15  -1   19.40    5.00
  -2  15  -1   23.60    5.50
  -2  15  -1   24.70    5.60
  -2  15  -1   20.10    4.90
  -2  15  -1   28.00    5.50
  -2  15  -1   21.90    5.30
  -2  15  -1   33.90    6.50
  -2  15  -1   24.60    5.30
   2 -15   1   25.20    5.80
   2 -15   1   29.50    6.00
   2 -15   1   16.70    4.80
   2 -15   1   20.40    5.20
   2 -15   1   16.60    4.70
   2 -15   1   22.60    5.10
   2 -15   1   25.30    5.80
   2 -15   1   21.50    5.40
   2 -15   1   19.60    5.00
  -3  15  -1   62.69    7.90
  -3  15  -1   61.69    8.00
  -3  15  -1   62.99    8.10
  -3  15  -1   80.59    9.20
  -3  15  -1   75.59   10.00
  -3  15  -1   63.79    8.10
  -3  15  -1   40.00    6.70
  -3  15  -1   55.09    7.70
  -3  15  -1   65.69    8.50
   3 -15   1   58.19    7.90
   3 -15   1   66.09    8.40
   3 -15   1   60.79    8.40
   3 -15   1   53.39    8.10
   3 -15   1   59.49    8.30
   3 -15   1   60.49    8.00
   3 -15   1   58.39    8.20
   3 -15   1   60.49    7.90
   3 -15   1   60.19    8.00
   3 -15   1   68.09    8.50
  -4  15  -1   42.40    7.00
  -4  15  -1   48.50    7.50
  -4  15  -1   49.50    7.30
  -4  15  -1   45.30    7.80
  -4  15  -1   38.40    6.50
  -4  15  -1   39.70    6.60
  -4  15  -1   57.69    7.90
  -4  15  -1   42.90    6.70
   4 -15   1   50.49    8.10
   4 -15   1   49.20    7.70
   4 -15   1   56.49    7.80
   4 -15   1   40.10    6.80
   4 -15   1   49.90    7.30
   4 -15   1   38.90    6.80
   4 -15   1   65.69    8.40
   4 -15   1   45.60    7.20
   4 -15   1   51.09    7.30
   4 -15   1   46.00    7.20
   4 -15   1   49.99    7.50
   4 -15   1   60.49    7.90
  -5  15  -1   15.30    4.50
  -5  15  -1   10.10    4.10
  -5  15  -1   18.40    5.30
  -5  15  -1   12.10    5.00
  -5  15  -1   12.50    4.40
  -5  15  -1   20.30    5.20
  -5  15  -1    8.80    4.00
  -5  15  -1   14.20    4.80
   5 -15   1   11.10    4.20
   5 -15   1   18.40    5.40
   5 -15   1   19.10    5.20
   5 -15   1   10.90    4.90
   5 -15   1   19.40    4.80
   5 -15   1   16.30    4.80
   5 -15   1   15.20    4.50
   5 -15   1   16.20    5.00
   4  14  -1    5.00    3.40
   4  14  -1    2.30    3.20
   4  14  -1    0.60    2.90
   4  14  -1    5.30    3.50
   4  14  -1   -1.20    2.60
   4  14  -1    7.60    3.80
   4  14  -1    1.30    3.40
   4  14  -1    5.30    4.00
   4  14  -1    2.70    3.30
  -4 -14   1    1.90    3.40
  -4 -14   1    7.60    4.00
  -4 -14   1   12.40    4.50
  -4 -14   1    5.20    4.00
  -4 -14   1    3.80    3.60
  -4 -14   1    8.80    4.30
  -4 -14   1    1.20    3.10
  -4 -14   1    2.80    3.50
   3  14  -1   40.90    6.70
   3  14  -1   32.30    6.30
   3  14  -1   36.80    6.70
   3  14  -1   45.60    7.30
   3  14  -1   32.50    6.40
   3  14  -1   23.60    5.70
   3  14  -1   31.10    6.70
   3  14  -1   30.20    6.00
   3  14  -1   46.40    6.30
   3  14  -1   39.80    5.90
  -3 -14   1   19.50    5.20
  -3 -14   1   23.40    5.70
  -3 -14   1   31.90    6.20
  -3 -14   1   35.70    6.40
  -3 -14   1   26.30    5.90
  -3 -14   1   24.40    5.80
  -3 -14   1   27.60    5.70
  -3 -14   1   29.10    6.20
  -3 -14   1   28.80    6.20
   2  14  -1   63.69    7.50
   2  14  -1   61.49    7.20
   2  14  -1   50.99    7.40
   2  14  -1   55.29    7.70
   2  14  -1   44.50    7.10
   2  14  -1   46.80    6.70
   2  14  -1   41.50    6.70
   2  14  -1   43.30    7.30
   2  14  -1   57.39    7.90
   2  14  -1   44.50    7.20
  -2 -14   1   51.09    6.60
  -2 -14   1   60.89    7.70
  -2 -14   1   48.50    7.60
  -2 -14   1   58.49    8.00
  -2 -14   1   47.80    7.50
  -2 -14   1   58.19    8.20
  -2 -14   1   54.39    7.40
  -2 -14   1   57.79    7.90
  -2 -14   1   70.39    8.40
  -2 -14   1   64.29    8.60
   1  14  -1   23.00    4.70
   1  14  -1   19.10    4.80
   1  14  -1   13.10    4.30
   1  14  -1   13.40    4.60
   1  14  -1   17.70    4.90
   1  14  -1   21.10    4.70
   1  14  -1   18.30    4.80
   1  14  -1   22.50    5.00
   1  14  -1   14.10    4.30
  -1 -14   1   21.40    5.30
  -1 -14   1   13.70    4.40
  -1 -14   1   15.60    4.50
  -1 -14   1   24.80    5.60
  -1 -14   1   12.10    4.10
  -1 -14   1   16.20    5.30
  -1 -14   1   19.50    5.60
  -1 -14   1   26.10    5.20
  -1 -14   1   18.70    5.10
  -1 -14   1   18.40    4.60
   0  14  -1   -0.50    2.50
   0  14  -1   -0.40    2.10
   0  14  -1    2.30    2.70
   0  14  -1    1.90    2.70
   0  14  -1   -0.70    2.40
   0  14  -1   -1.10    1.90
   0  14  -1   -0.40    2.10
   0  14  -1    1.50    2.50
   0  14  -1   -1.00    2.30
   0  14  -1   -1.30    2.60
   0  14  -1    1.80    3.10
   0 -14   1   -3.00    2.10
   0 -14   1    0.70    2.40
   0 -14   1   -1.00    2.30
   0 -14   1   -0.30    2.70
   0 -14   1    0.50    3.10
   0 -14   1   -0.30    2.70
   0 -14   1    4.00    3.20
   0 -14   1   -0.80    2.40
   0 -14   1    1.00    2.60
   0 -14   1    0.80    2.40
   0 -14   1   -0.40    2.40
  -1  14  -1    5.30    3.20
  -1  14  -1   10.30    3.80
  -1  14  -1    5.80    3.00
  -1  14  -1    6.30    3.50
  -1  14  -1    7.10    3.70
  -1  14  -1    5.60    3.40
  -1  14  -1    6.40    3.70
  -1  14  -1    4.40    2.80
  -1  14  -1    5.80    3.20
  -1  14  -1    5.00    3.10
  -1  14  -1    5.70    3.30
   1 -14   1    7.10    3.40
   1 -14   1    6.70    3.40
   1 -14   1    7.50    3.50
   1 -14   1    8.40    3.80
   1 -14   1    3.40    2.90
   1 -14   1    2.30    2.80
   1 -14   1    7.80    3.30
   1 -14   1    8.00    3.80
   1 -14   1   10.20    3.50
   1 -14   1    2.70    2.70
   1 -14   1    6.10    3.30
  -2  14  -1   35.00    6.00
  -2  14  -1   24.90    5.10
  -2  14  -1   25.10    4.90
  -2  14  -1   21.60    5.40
  -2  14  -1   24.50    5.10
  -2  14  -1   27.80    5.60
  -2  14  -1   30.80    5.50
  -2  14  -1   33.20    5.80
  -2  14  -1   25.20    5.10
  -2  14  -1   22.40    4.60
   2 -14   1   27.10    5.30
   2 -14   1   24.10    5.10
   2 -14   1   33.60    5.90
   2 -14   1   35.20    6.50
   2 -14   1   30.20    5.80
   2 -14   1   37.70    6.10
   2 -14   1   31.20    5.60
   2 -14   1   36.10    6.00
   2 -14   1   29.70    5.80
   2 -14   1   28.30    5.30
   2 -14   1   24.20    5.10
  -3  14  -1   25.70    5.60
  -3  14  -1   18.50    4.70
  -3  14  -1   15.50    4.10
  -3  14  -1   17.60    4.40
  -3  14  -1   22.30    5.00
  -3  14  -1    9.10    3.70
  -3  14  -1   10.70    3.50
  -3  14  -1   14.40    4.50
  -3  14  -1   25.70    5.40
   3 -14   1   13.90    4.10
   3 -14   1   20.70    5.10
   3 -14   1   24.30    5.10
   3 -14   1   18.60    5.00
   3 -14   1   12.40    3.90
   3 -14   1   17.10    4.50
   3 -14   1   15.60    4.40
   3 -14   1   12.20    4.00
   3 -14   1   13.60    4.20
   3 -14   1   12.60    4.20
   3 -14   1   24.70    5.50
   3 -14   1   20.40    5.00
   3 -14   1   18.20    4.60
  -4  14  -1   25.70    5.50
  -4  14  -1   29.90    5.60
  -4  14  -1   15.90    4.30
  -4  14  -1   29.70    5.60
  -4  14  -1   28.30    5.40
  -4  14  -1   19.70    4.60
  -4  14  -1   29.50    6.10
  -4  14  -1   23.40    5.40
  -4  14  -1   24.30    5.40
   4 -14   1   18.60    4.70
   4 -14   1   18.70    4.70
   4 -14   1    8.20    3.50
   4 -14   1   17.40    4.70
   4 -14   1   22.00    4.90
   4 -14   1   14.00    4.50
   4 -14   1   19.60    5.40
   4 -14   1   13.10    4.30
   4 -14   1   13.80    4.20
   4 -14   1    9.70    4.20
   4 -14   1   16.10    4.40
   4 -14   1   13.10    4.20
   4 -14   1   14.60    4.20
  -5  14  -1   51.29    7.40
  -5  14  -1   36.10    6.40
  -5  14  -1   32.70    6.00
  -5  14  -1   40.50    6.40
  -5  14  -1   45.50    6.80
  -5  14  -1   38.40    6.30
  -5  14  -1   37.60    6.30
  -5  14  -1   40.00    6.50
   5 -14   1   48.30    7.70
   5 -14   1   43.90    6.70
   5 -14   1   43.00    6.10
   5 -14   1   55.49    7.90
   5 -14   1   39.80    6.70
   5 -14   1   31.40    5.80
   5 -14   1   33.30    6.40
   5 -14   1   34.00    5.90
   5 -14   1   36.20    6.30
   5 -14   1   30.50    5.90
   5 -14   1   32.40    5.80
   5 -14   1   41.80    6.60
  -6  14  -1   21.60    5.20
  -6  14  -1   19.30    5.20
  -6  14  -1   17.10    4.60
  -6  14  -1    9.70    3.80
  -6  14  -1   13.30    4.70
  -6  14  -1   16.60    4.80
   6 -14   1   11.50    4.50
   6 -14   1   18.70    5.10
   6 -14   1   22.20    5.00
   6 -14   1   27.20    5.90
   6 -14   1   11.40    4.50
   6 -14   1   15.90    4.80
   6 -14   1   15.00    4.80
  -7  14  -1    2.30    2.90
  -7  14  -1    5.80    3.70
  -7  14  -1   12.80    4.50
  -7  14  -1    2.80    3.20
  -7  14  -1    4.10    2.90
  -7  14  -1    2.70    3.20
   7 -14   1    5.80    3.50
   7 -14   1    6.70    3.70
   7 -14   1    3.20    3.30
   7 -14   1    3.10    3.30
   7 -14   1    2.70    3.50
   7 -14   1    8.40    4.10
   7 -14   1    6.60    3.00
   6  13  -1    0.50    3.50
   6  13  -1   -2.50    2.70
   6  13  -1    3.80    3.60
   6  13  -1    1.60    3.70
  -6 -13   1    1.50    3.40
  -6 -13   1   -0.10    3.20
  -6 -13   1    1.80    3.50
  -6 -13   1    1.30    3.40
   5  13  -1   17.30    4.80
   5  13  -1    8.00    3.90
   5  13  -1    3.80    3.40
   5  13  -1   11.10    4.40
   5  13  -1   13.40    4.70
   5  13  -1    7.00    3.00
   5  13  -1   11.00    4.60
   5  13  -1   11.90    4.00
   5  13  -1   13.20    4.50
  -5 -13   1   12.90    4.60
  -5 -13   1   12.10    4.40
  -5 -13   1   13.30    4.70
  -5 -13   1   18.20    4.80
  -5 -13   1   14.10    4.80
  -5 -13   1   16.00    4.90
  -5 -13   1   16.30    4.90
  -5 -13   1    7.90    4.40
  -5 -13   1    8.50    4.30
  -5 -13   1    8.10    3.70
  -5 -13   1   14.00    4.50
   4  13  -1   27.60    6.00
   4  13  -1   25.80    5.70
   4  13  -1   26.00    5.40
   4  13  -1   24.90    5.80
   4  13  -1   26.30    5.70
   4  13  -1   34.80    6.40
   4  13  -1   27.30    5.80
   4  13  -1   33.90    5.60
   4  13  -1   39.90    7.10
   4  13  -1   35.70    6.20
   4  13  -1   26.60    5.00
  -4 -13   1   26.20    5.40
  -4 -13   1   28.80    5.90
  -4 -13   1   24.30    5.60
  -4 -13   1   35.00    6.40
  -4 -13   1   30.70    5.80
  -4 -13   1   26.40    5.90
  -4 -13   1   51.69    7.80
  -4 -13   1   23.00    5.10
  -4 -13   1   25.90    5.90
   3  13  -1   18.40    4.50
   3  13  -1   58.39    8.80
   3  13  -1   18.50    4.70
   3  13  -1   18.10    4.60
   3  13  -1   16.40    4.70
   3  13  -1   25.20    5.30
   3  13  -1   19.40    5.20
   3  13  -1   29.60    6.00
   3  13  -1   31.40    4.80
   3  13  -1   23.60    4.40
   3  13  -1   18.80    4.90
  -3 -13   1   25.40    5.70
  -3 -13   1   35.80    6.50
  -3 -13   1   26.40    5.60
  -3 -13   1   30.40    5.70
  -3 -13   1   23.60    5.80
  -3 -13   1   22.30    4.70
  -3 -13   1   37.10    6.10
  -3 -13   1   27.10    5.50
  -3 -13   1   32.30    6.00
   2  13  -1   29.50    5.60
   2  13  -1   21.30    5.20
   2  13  -1   19.10    4.30
   2  13  -1   28.30    5.50
   2  13  -1   18.50    4.20
   2  13  -1   21.00    4.80
   2  13  -1   15.20    4.40
   2  13  -1   21.40    4.80
   2  13  -1   28.00    5.30
   2  13  -1   14.40    4.20
  -2 -13   1   26.60    4.80
  -2 -13   1   15.60    4.50
  -2 -13   1   19.60    4.70
  -2 -13   1   27.80    5.10
  -2 -13   1   28.70    5.40
  -2 -13   1   20.50    4.30
  -2 -13   1   34.90    6.50
  -2 -13   1   19.90    4.70
  -2 -13   1   25.50    5.70
  -2 -13   1   21.70    5.00
  -2 -13   1   23.80    5.50
  -2 -13   1   27.60    5.50
   1  13  -1   55.69    7.00
   1  13  -1   56.79    7.60
   1  13  -1   55.49    7.30
   1  13  -1   59.59    8.10
   1  13  -1   59.29    6.90
   1  13  -1   52.49    6.70
   1  13  -1   48.40    7.30
   1  13  -1   59.39    7.30
   1  13  -1   52.29    7.20
   1  13  -1   38.90    6.20
   1  13  -1   52.69    7.00
  -1 -13   1   64.99    9.60
  -1 -13   1   51.29    7.30
  -1 -13   1   54.89    7.70
  -1 -13   1   66.89    7.40
  -1 -13   1   42.40    6.20
  -1 -13   1   38.80    6.50
  -1 -13   1   68.99    7.90
  -1 -13   1   52.69    7.50
  -1 -13   1   49.20    6.90
  -1 -13   1   61.59    6.90
  -1 -13   1   47.60    7.10
  -1 -13   1   44.90    6.10
   0  13  -1   14.10    3.70
   0  13  -1   11.50    3.50
   0  13  -1   16.10    4.20
   0  13  -1   13.30    3.70
   0  13  -1    9.70    3.60
   0  13  -1   13.00    3.80
   0  13  -1   11.70    3.60
   0  13  -1   13.50    4.00
   0  13  -1   10.90    4.10
   0  13  -1   12.80    3.80
   0  13  -1   13.80    3.70
   0 -13   1   14.60    4.20
   0 -13   1   16.40    4.50
   0 -13   1   13.60    4.30
   0 -13   1   16.80    4.40
   0 -13   1   19.40    4.20
   0 -13   1   11.40    4.00
   0 -13   1   18.10    4.70
   0 -13   1   14.10    4.10
   0 -13   1   18.30    4.10
   0 -13   1   14.70    4.60
   0 -13   1   18.50    4.30
  -1  13  -1   11.50    3.50
  -1  13  -1    9.90    3.20
  -1  13  -1    2.50    2.30
  -1  13  -1    2.80    2.90
  -1  13  -1    5.80    2.70
  -1  13  -1    2.70    2.60
  -1  13  -1   12.30    4.00
  -1  13  -1    3.10    2.50
  -1  13  -1    3.20    2.80
  -1  13  -1    7.10    3.50
  -1  13  -1   13.30    4.00
  -1  13  -1    7.80    3.20
   1 -13   1    3.50    2.70
   1 -13   1    6.60    3.60
   1 -13   1    5.70    2.80
   1 -13   1    9.70    3.50
   1 -13   1    6.20    3.30
   1 -13   1    4.70    3.10
   1 -13   1    4.70    3.00
   1 -13   1    6.80    3.50
   1 -13   1    6.20    3.00
   1 -13   1    3.20    2.60
   1 -13   1    5.70    2.90
  -2  13  -1    4.00    2.60
  -2  13  -1    6.10    3.00
  -2  13  -1   15.70    4.20
  -2  13  -1    9.90    3.60
  -2  13  -1    6.10    2.90
  -2  13  -1    3.00    2.70
  -2  13  -1    3.90    2.60
  -2  13  -1    5.70    2.90
  -2  13  -1    4.10    2.60
  -2  13  -1    5.20    3.40
   2 -13   1    1.60    2.50
   2 -13   1    4.00    2.60
   2 -13   1    8.80    3.50
   2 -13   1    2.70    2.70
   2 -13   1    4.70    2.80
   2 -13   1    1.20    2.50
   2 -13   1    5.00    3.00
   2 -13   1    3.40    2.60
   2 -13   1    7.40    3.30
   2 -13   1   -0.30    2.20
   2 -13   1    6.40    3.30
   2 -13   1    4.90    2.80
   2 -13   1    0.90    2.50
  -3  13  -1    1.20    2.40
  -3  13  -1    3.60    2.90
  -3  13  -1    1.00    2.20
  -3  13  -1    5.30    3.00
  -3  13  -1    1.90    2.90
  -3  13  -1    2.90    2.30
  -3  13  -1    7.10    3.10
  -3  13  -1    2.70    2.90
  -3  13  -1    1.50    2.40
   3 -13   1    0.60    2.00
   3 -13   1    5.20    2.60
   3 -13   1   11.00    3.80
   3 -13   1    9.10    3.50
   3 -13   1    3.10    2.70
   3 -13   1    2.00    2.60
   3 -13   1    4.60    3.30
   3 -13   1    1.60    2.50
   3 -13   1    2.20    2.60
   3 -13   1    2.50    2.60
   3 -13   1    2.00    2.60
   3 -13   1    1.90    2.50
  -4  13  -1    3.10    3.00
  -4  13  -1    4.80    3.20
  -4  13  -1    6.10    3.20
  -4  13  -1    7.50    3.40
  -4  13  -1    6.10    3.00
  -4  13  -1    7.30    3.20
  -4  13  -1    8.30    3.50
  -4  13  -1    4.30    2.50
   4 -13   1    5.40    2.80
   4 -13   1   10.50    3.80
   4 -13   1    6.90    3.30
   4 -13   1    2.80    3.00
   4 -13   1    6.10    3.00
   4 -13   1    3.60    2.80
   4 -13   1    8.10    3.60
   4 -13   1    2.90    2.60
   4 -13   1    4.50    2.80
   4 -13   1    5.90    3.20
   4 -13   1    1.70    2.50
   4 -13   1    4.10    2.80
   4 -13   1    3.20    2.40
  -5  13  -1   10.50    3.80
  -5  13  -1   12.90    3.80
  -5  13  -1   16.10    4.10
  -5  13  -1    8.20    3.80
  -5  13  -1   20.20    4.50
  -5  13  -1   12.40    3.80
  -5  13  -1   17.00    4.60
   5 -13   1   10.60    4.10
   5 -13   1   13.40    4.00
   5 -13   1    9.60    3.70
   5 -13   1   16.30    4.60
   5 -13   1   10.10    3.80
   5 -13   1   11.80    3.80
   5 -13   1    9.80    3.90
   5 -13   1   19.60    4.90
   5 -13   1   13.60    3.70
   5 -13   1   14.20    4.30
   5 -13   1   17.70    4.50
   5 -13   1   10.60    3.50
   5 -13   1    6.80    3.00
   5 -13   1   10.10    3.60
  -6  13  -1   23.80    5.00
  -6  13  -1   46.00    6.80
  -6  13  -1   45.80    6.60
  -6  13  -1   33.80    5.90
  -6  13  -1   32.40    5.90
  -6  13  -1   31.60    5.70
  -6  13  -1   42.50    6.70
  -6  13  -1   33.20    5.50
  -6  13  -1   32.20    5.70
  -6  13  -1   42.00    5.90
   6 -13   1   33.30    6.00
   6 -13   1   38.70    6.40
   6 -13   1   47.40    7.30
   6 -13   1   45.90    6.90
   6 -13   1   35.50    5.50
   6 -13   1   46.60    7.20
   6 -13   1   43.90    7.40
   6 -13   1   37.50    5.90
   6 -13   1   43.30    6.60
  -7  13  -1   19.10    5.30
  -7  13  -1   21.40    5.40
  -7  13  -1   33.00    5.90
  -7  13  -1   21.40    5.00
  -7  13  -1   11.10    4.40
  -7  13  -1   28.20    5.30
  -7  13  -1   25.30    5.40
  -7  13  -1   17.70    4.20
  -7  13  -1   21.80    5.60
  -7  13  -1   12.10    4.10
   7 -13   1   22.40    5.60
   7 -13   1   22.40    5.40
   7 -13   1   26.50    5.50
   7 -13   1   18.10    4.90
   7 -13   1   20.70    5.10
   7 -13   1   25.10    4.70
   7 -13   1   23.20    5.30
   7 -13   1   21.60    5.40
   7 -13   1   21.80    5.20
  -8  13  -1    6.90    3.50
  -8  13  -1   11.40    4.80
  -8  13  -1    7.80    3.50
  -8  13  -1   10.80    3.50
  -8  13  -1    5.40    3.40
  -8  13  -1   16.10    4.90
  -8  13  -1    4.70    3.90
  -8  13  -1    9.20    3.80
  -8  13  -1   11.90    4.30
   8 -13   1    8.30    3.00
   8 -13   1   14.40    5.20
   8 -13   1   10.00    4.20
   8 -13   1    8.20    3.60
   8 -13   1    9.40    4.40
   8 -13   1    4.00    3.70
   8 -13   1   13.10    4.30
   7  12  -1  100.99   10.80
   7  12  -1   84.89   10.50
   7  12  -1  110.09   15.20
   7  12  -1   96.09   11.30
   7  12  -1   95.49   11.40
   7  12  -1   85.59   10.60
   7  12  -1   95.29   11.00
   7  12  -1   95.39   10.30
  -7 -12   1  100.39   10.60
  -7 -12   1   91.19   10.20
  -7 -12   1   92.79   10.40
  -7 -12   1   79.09    9.20
  -7 -12   1   96.79   10.30
  -7 -12   1   98.79   10.30
  -7 -12   1   93.99    9.80
  -7 -12   1  101.19   11.10
   6  12  -1   66.79    8.60
   6  12  -1   64.19    8.80
   6  12  -1   40.20    6.90
   6  12  -1   58.29    8.10
   6  12  -1   60.79    7.60
   6  12  -1   68.29    9.20
   6  12  -1   60.29    8.90
   6  12  -1   64.09    8.90
  -6 -12   1   56.59    8.20
  -6 -12   1   53.39    6.80
  -6 -12   1   58.29    8.00
  -6 -12   1   54.49    7.80
  -6 -12   1   59.39    7.80
  -6 -12   1   58.39    8.40
  -6 -12   1   65.19    8.40
  -6 -12   1   59.19    8.20
  -6 -12   1   52.69    7.50
  -6 -12   1   46.40    7.20
  -6 -12   1   67.39    9.00
   5  12  -1    7.00    3.50
   5  12  -1    5.60    3.20
   5  12  -1    2.50    2.40
   5  12  -1   10.30    3.90
   5  12  -1    4.10    3.10
   5  12  -1   10.90    4.10
   5  12  -1    2.70    2.90
   5  12  -1    6.50    3.50
   5  12  -1    5.80    3.40
   5  12  -1    3.50    3.00
  -5 -12   1    4.90    3.60
  -5 -12   1    7.70    3.90
  -5 -12   1    9.30    3.70
  -5 -12   1    6.10    3.50
  -5 -12   1   10.50    4.00
  -5 -12   1    5.80    3.80
  -5 -12   1    8.10    3.80
  -5 -12   1    2.60    2.80
  -5 -12   1    7.10    3.70
  -5 -12   1    3.30    3.20
  -5 -12   1    7.60    3.70
  -5 -12   1    6.30    3.30
   4  12  -1    9.30    3.10
   4  12  -1   10.70    3.20
   4  12  -1    9.70    3.70
   4  12  -1   18.50    4.80
   4  12  -1   13.60    4.10
   4  12  -1    6.60    3.20
   4  12  -1    9.40    3.60
   4  12  -1    8.80    3.30
   4  12  -1    3.70    3.20
   4  12  -1   10.20    4.00
   4  12  -1    9.60    3.90
  -4 -12   1   17.70    4.40
  -4 -12   1   13.80    4.20
  -4 -12   1   12.20    4.10
  -4 -12   1   14.30    4.20
  -4 -12   1   11.20    3.50
  -4 -12   1   17.10    4.50
  -4 -12   1   14.70    4.70
  -4 -12   1   17.30    4.50
  -4 -12   1    9.50    3.70
  -4 -12   1   12.10    3.50
  -4 -12   1   14.10    4.10
  -4 -12   1   13.50    4.50
   3  12  -1   25.10    4.90
   3  12  -1   25.90    4.80
   3  12  -1   25.10    5.30
   3  12  -1   23.70    4.70
   3  12  -1   32.40    5.50
   3  12  -1   34.20    6.00
   3  12  -1   26.00    5.30
   3  12  -1   28.00    4.60
   3  12  -1   36.10    6.40
   3  12  -1   42.30    6.20
   3  12  -1   38.90    6.50
   3  12  -1   36.70    5.10
   3  12  -1   22.20    4.80
  -3 -12   1   31.60    5.70
  -3 -12   1   25.60    5.40
  -3 -12   1   27.90    5.40
  -3 -12   1   52.09   10.50
  -3 -12   1   54.69    7.00
  -3 -12   1   34.20    6.20
  -3 -12   1   29.80    5.40
  -3 -12   1   40.40    6.10
  -3 -12   1   33.20    5.70
  -3 -12   1   34.90    5.50
  -3 -12   1   27.30    4.60
  -3 -12   1   30.70    4.90
  -3 -12   1   38.70    5.60
   2  12  -1    6.70    2.90
   2  12  -1    3.80    2.90
   2  12  -1    3.10    2.50
   2  12  -1    3.60    2.70
   2  12  -1    2.30    2.80
   2  12  -1    8.10    3.30
   2  12  -1    5.60    3.00
   2  12  -1    4.00    3.30
   2  12  -1    2.70    2.20
   2  12  -1    3.90    2.30
   2  12  -1    2.40    2.70
   2  12  -1    4.60    2.40
  -2 -12   1   11.50    3.90
  -2 -12   1    6.30    2.70
  -2 -12   1    2.10    2.70
  -2 -12   1    6.20    3.20
  -2 -12   1    6.40    3.20
  -2 -12   1    1.20    2.30
  -2 -12   1    3.00    2.70
  -2 -12   1    3.70    2.50
  -2 -12   1    5.50    2.60
  -2 -12   1    3.10    2.40
  -2 -12   1    0.70    2.30
  -2 -12   1    6.50    3.30
   1  12  -1   28.00    4.90
   1  12  -1   27.90    4.50
   1  12  -1   28.70    4.90
   1  12  -1   29.40    5.00
   1  12  -1   29.70    5.80
   1  12  -1   22.00    4.60
   1  12  -1   21.50    4.40
   1  12  -1   19.50    4.50
   1  12  -1   18.80    4.10
   1  12  -1   29.20    4.60
   1  12  -1   30.40    5.40
   1  12  -1   27.40    4.90
  -1 -12   1   22.80    5.10
  -1 -12   1   28.10    4.70
  -1 -12   1   33.30    5.70
  -1 -12   1   22.70    4.90
  -1 -12   1   34.20    5.80
  -1 -12   1   31.30    4.70
  -1 -12   1   31.60    4.80
  -1 -12   1   26.80    4.80
  -1 -12   1   34.10    5.10
  -1 -12   1   20.90    4.70
  -1 -12   1   29.50    5.20
  -1 -12   1   28.70    5.00
  -1 -12   1   32.20    5.10
   0  12  -1   31.30    4.60
   0  12  -1   34.50    5.50
   0  12  -1   29.20    5.20
   0  12  -1   38.50    5.30
   0  12  -1   30.80    4.90
   0  12  -1   34.80    5.30
   0  12  -1   33.40    5.50
   0  12  -1   29.60    5.00
   0  12  -1   24.30    5.00
   0  12  -1   24.80    4.60
   0  12  -1   36.60    5.40
   0  12  -1   27.40    4.50
   0  12  -1   29.10    5.10
   0 -12   1   43.20    6.60
   0 -12   1   27.20    4.50
   0 -12   1   30.20    5.30
   0 -12   1   34.40    5.50
   0 -12   1   35.00    6.20
   0 -12   1   26.80    4.50
   0 -12   1   31.10    5.00
   0 -12   1   20.00    4.50
   0 -12   1   23.00    4.60
   0 -12   1   24.30    4.30
   0 -12   1   20.60    4.10
   0 -12   1   27.10    5.10
   0 -12   1   23.10    4.90
  -1  12  -1   32.10    4.90
  -1  12  -1   42.10    5.90
  -1  12  -1   40.10    6.00
  -1  12  -1   32.80    5.20
  -1  12  -1   34.50    5.30
  -1  12  -1   37.30    5.30
  -1  12  -1   39.10    5.70
  -1  12  -1   44.40    6.50
  -1  12  -1   39.60    5.70
  -1  12  -1   32.90    5.40
  -1  12  -1   38.30    5.10
   1 -12   1   30.30    5.40
   1 -12   1   32.40    5.40
   1 -12   1   37.70    5.50
   1 -12   1   42.00    5.90
   1 -12   1   38.10    5.50
   1 -12   1   45.00    5.70
   1 -12   1   44.00    5.60
   1 -12   1   34.60    5.20
   1 -12   1   39.70    5.70
   1 -12   1   41.10    5.60
   1 -12   1   41.50    6.00
   1 -12   1   41.80    6.30
   1 -12   1   37.10    5.60
  -2  12  -1   70.69    7.60
  -2  12  -1   70.99    7.50
  -2  12  -1   59.89    6.30
  -2  12  -1   69.49    7.30
  -2  12  -1   68.09    7.00
  -2  12  -1   72.19    8.40
  -2  12  -1   48.10    6.30
  -2  12  -1   78.19    8.10
  -2  12  -1   67.09    7.40
  -2  12  -1   59.99    6.70
  -2  12  -1   72.69    7.50
   2 -12   1   73.19    7.30
   2 -12   1   65.09    7.40
   2 -12   1   66.59    7.30
   2 -12   1   61.79    7.00
   2 -12   1   75.09    7.60
   2 -12   1   67.49    7.80
   2 -12   1   75.19    6.10
   2 -12   1   81.99    7.90
   2 -12   1   90.59    9.00
   2 -12   1   72.79    7.50
   2 -12   1   66.29    7.00
   2 -12   1   83.69    8.30
   2 -12   1   77.99    8.10
  -3  12  -1    3.20    2.30
  -3  12  -1    6.50    2.90
  -3  12  -1   10.20    3.40
  -3  12  -1    1.30    2.40
  -3  12  -1    4.00    2.70
  -3  12  -1    0.90    1.90
  -3  12  -1    7.80    3.00
  -3  12  -1    3.40    2.30
  -3  12  -1    4.00    2.70
  -3  12  -1    4.60    2.50
   3 -12   1    5.70    2.80
   3 -12   1    9.30    3.10
   3 -12   1    4.50    2.70
   3 -12   1    9.20    3.20
   3 -12   1    5.70    2.90
   3 -12   1    4.10    2.70
   3 -12   1    8.00    3.10
   3 -12   1    4.90    2.70
   3 -12   1    2.40    2.20
   3 -12   1    5.20    3.00
   3 -12   1    5.90    2.70
   3 -12   1    8.10    3.00
   3 -12   1    3.90    2.50
   3 -12   1    7.20    3.30
  -4  12  -1  114.09    7.90
  -4  12  -1  100.99    6.80
  -4  12  -1  120.29    8.20
  -4  12  -1  104.29    7.90
  -4  12  -1  119.19    7.20
  -4  12  -1  126.39    8.60
  -4  12  -1  117.99    8.20
  -4  12  -1  106.29    7.90
  -4  12  -1   99.49    7.50
   4 -12   1   91.89    7.60
   4 -12   1   80.89    8.40
   4 -12   1  100.79    7.30
   4 -12   1  111.89    8.20
   4 -12   1  102.69    7.50
   4 -12   1  108.39    8.00
   4 -12   1  113.69    7.90
   4 -12   1   97.99    7.10
   4 -12   1  104.79    7.70
   4 -12   1  110.99    7.90
   4 -12   1  118.19    8.20
   4 -12   1   97.79    7.40
   4 -12   1   97.39    7.40
   4 -12   1   92.99    8.90
   4 -12   1  112.99    7.90
  -5  12  -1   55.69    6.90
  -5  12  -1   52.79    6.80
  -5  12  -1   61.39    6.90
  -5  12  -1   63.99    7.70
  -5  12  -1   50.49    6.70
  -5  12  -1   70.69    8.10
  -5  12  -1   58.79    7.40
  -5  12  -1   51.89    6.70
  -5  12  -1   46.70    5.90
  -5  12  -1   54.09    6.80
   5 -12   1   60.59    6.80
   5 -12   1   54.19    6.30
   5 -12   1   58.89    7.60
   5 -12   1   60.39    7.00
   5 -12   1   52.69    6.80
   5 -12   1   62.79    7.60
   5 -12   1   55.29    6.60
   5 -12   1   51.19    6.80
   5 -12   1   61.09    7.40
   5 -12   1   65.59    7.60
   5 -12   1   76.49    5.80
   5 -12   1   57.29    7.40
   5 -12   1   73.79    7.50
   5 -12   1   68.29    7.10
   5 -12   1   64.79    7.10
   5 -12   1   64.79    7.70
  -6  12  -1   12.30    4.00
  -6  12  -1    7.60    3.30
  -6  12  -1   14.00    4.10
  -6  12  -1   12.70    4.10
  -6  12  -1   12.80    3.70
  -6  12  -1   11.30    3.60
  -6  12  -1   14.40    4.00
  -6  12  -1    8.20    3.00
  -6  12  -1    9.00    3.50
  -6  12  -1   13.80    4.20
   6 -12   1   15.00    4.00
   6 -12   1   18.50    4.60
   6 -12   1   12.70    4.20
   6 -12   1   11.30    3.90
   6 -12   1   16.20    4.30
   6 -12   1   15.80    4.00
   6 -12   1    6.70    3.20
   6 -12   1   13.60    3.50
   6 -12   1   14.60    4.20
   6 -12   1   13.90    4.10
  -7  12  -1   -0.80    2.30
  -7  12  -1   -1.40    2.00
  -7  12  -1   -1.80    2.20
  -7  12  -1    1.40    2.80
  -7  12  -1    1.60    2.40
  -7  12  -1   -2.00    2.20
  -7  12  -1    0.00    2.10
  -7  12  -1    1.20    2.60
  -7  12  -1    1.40    3.00
  -7  12  -1   -1.60    1.60
   7 -12   1    0.00    2.50
   7 -12   1   -0.60    1.80
   7 -12   1   -1.00    2.30
   7 -12   1    0.40    2.40
   7 -12   1    1.10    2.50
   7 -12   1    0.90    2.50
   7 -12   1   -1.60    2.00
   7 -12   1    0.90    2.60
   7 -12   1   -1.10    1.90
   7 -12   1    0.20    2.30
  -8  12  -1   18.30    5.10
  -8  12  -1   14.30    3.70
  -8  12  -1   25.20    5.70
  -8  12  -1   16.80    4.50
  -8  12  -1   20.10    4.80
  -8  12  -1   10.70    3.80
  -8  12  -1   19.40    4.90
  -8  12  -1   20.00    5.20
   8 -12   1   21.70    4.70
   8 -12   1   22.80    5.50
   8 -12   1   23.70    5.30
   8 -12   1   20.00    5.20
   8 -12   1   11.20    4.20
   8 -12   1   18.20    4.60
   8 -12   1   19.90    5.00
   8 -12   1   11.90    3.40
  -9  12  -1   15.40    4.00
  -9  12  -1   18.90    5.10
  -9  12  -1   17.40    4.80
  -9  12  -1    9.40    3.80
  -9  12  -1   16.40    4.80
  -9  12  -1   19.20    5.20
  -9  12  -1   25.20    5.60
   9 -12   1   19.70    5.50
   9 -12   1   21.30    5.00
   9 -12   1   17.40    4.90
   9 -12   1   24.20    5.70
   9 -12   1   22.90    5.80
   9 -12   1   19.20    4.80
   9 -12   1   22.80    5.60
   9 -12   1   13.70    3.60
   8  11  -1    6.30    3.90
   8  11  -1    9.90    4.60
   8  11  -1    7.20    3.80
   8  11  -1    8.30    4.40
   8  11  -1    5.30    4.10
   8  11  -1    8.40    4.40
   8  11  -1    9.50    4.90
   8  11  -1   10.70    4.70
  -8 -11   1   12.10    4.80
  -8 -11   1   12.90    4.70
  -8 -11   1   12.20    3.90
  -8 -11   1   15.20    4.60
  -8 -11   1   11.50    4.40
  -8 -11   1   10.70    4.60
  -8 -11   1   13.50    4.90
   7  11  -1    3.20    3.30
   7  11  -1    0.70    3.00
   7  11  -1    0.70    2.10
   7  11  -1    4.80    3.50
   7  11  -1    3.80    3.20
   7  11  -1    6.30    3.70
   7  11  -1    3.60    3.30
   7  11  -1   -0.50    2.40
   7  11  -1    8.20    3.90
  -7 -11   1    2.00    3.60
  -7 -11   1   10.20    3.80
  -7 -11   1    4.90    3.20
  -7 -11   1    4.40    4.00
  -7 -11   1   -3.10    2.40
  -7 -11   1    2.40    3.10
  -7 -11   1    4.50    3.30
  -7 -11   1    3.50    2.90
  -7 -11   1    6.10    3.40
   6  11  -1   34.50    6.50
   6  11  -1   29.00    5.80
   6  11  -1   26.10    6.00
   6  11  -1   22.70    5.50
   6  11  -1   27.70    5.70
   6  11  -1   21.90    5.20
   6  11  -1   37.60    5.90
   6  11  -1   25.90    5.90
   6  11  -1   32.10    5.50
  -6 -11   1   35.20    6.10
  -6 -11   1   34.10    5.90
  -6 -11   1   27.60    6.00
  -6 -11   1   32.70    6.00
  -6 -11   1   32.10    6.20
  -6 -11   1   29.20    6.10
  -6 -11   1   29.40    5.70
  -6 -11   1   31.50    5.30
  -6 -11   1   30.90    5.90
  -6 -11   1   35.50    6.00
  -6 -11   1   30.90    5.90
  -6 -11   1   32.80    5.90
   5  11  -1   27.10    5.80
   5  11  -1   42.90    6.00
   5  11  -1   47.60    7.20
   5  11  -1   37.40    6.10
   5  11  -1   47.50    6.90
   5  11  -1   46.20    6.90
   5  11  -1   40.50    6.60
   5  11  -1   38.20    6.10
   5  11  -1   34.30    5.90
   5  11  -1   51.39    7.40
   5  11  -1   43.20    6.00
  -5 -11   1   34.60    5.40
  -5 -11   1   29.60    5.50
  -5 -11   1   33.80    6.20
  -5 -11   1   42.10    6.80
  -5 -11   1   38.50    6.00
  -5 -11   1   47.80    7.30
  -5 -11   1   56.29    6.90
  -5 -11   1   38.90    6.20
  -5 -11   1   46.70    6.90
  -5 -11   1   53.09    7.20
  -5 -11   1   42.80    6.70
  -5 -11   1   42.20    6.60
   4  11  -1   36.40    6.20
   4  11  -1   28.70    5.00
   4  11  -1   29.60    5.40
   4  11  -1   34.90    6.10
   4  11  -1   29.80    5.50
   4  11  -1   26.40    5.70
   4  11  -1   32.60    5.60
   4  11  -1   28.60    4.90
   4  11  -1   29.20    5.20
   4  11  -1   29.00    5.30
   4  11  -1   37.50    6.30
   4  11  -1   38.80    5.20
   4  11  -1   36.20    4.80
   4  11  -1   26.80    5.10
   4  11  -1   35.20    5.90
  -4 -11   1   33.20    5.70
  -4 -11   1   38.60    6.20
  -4 -11   1   32.10    5.70
  -4 -11   1   40.70    6.50
  -4 -11   1   38.20    5.60
  -4 -11   1   30.00    4.80
  -4 -11   1   29.30    5.30
  -4 -11   1   29.70    5.20
  -4 -11   1   33.90    5.50
  -4 -11   1   35.40    5.90
  -4 -11   1   42.60    6.30
  -4 -11   1   19.50    4.60
  -4 -11   1   47.00    6.70
   3  11  -1   85.69    9.20
   3  11  -1  114.79    8.20
   3  11  -1  117.89    7.00
   3  11  -1   99.79    7.70
   3  11  -1  105.39    8.10
   3  11  -1  105.29    7.60
   3  11  -1   94.29    7.60
   3  11  -1   95.49    7.50
   3  11  -1   91.89    7.00
   3  11  -1  115.29    7.10
   3  11  -1  117.29    7.50
   3  11  -1  106.99    7.40
   3  11  -1  110.79    7.90
   3  11  -1  114.79   11.40
  -3 -11   1   98.69    7.10
  -3 -11   1  101.99    6.70
  -3 -11   1   97.69    7.50
  -3 -11   1  104.49    7.60
  -3 -11   1  110.69    7.10
  -3 -11   1  111.59    8.10
  -3 -11   1  110.39    7.80
  -3 -11   1  115.49    7.50
  -3 -11   1  101.59    7.90
  -3 -11   1   99.59    7.80
  -3 -11   1  110.89    8.30
  -3 -11   1  118.99    8.20
  -3 -11   1  111.19    8.40
  -3 -11   1   97.89    9.60
   2  11  -1  105.99    7.50
   2  11  -1  112.99    7.90
   2  11  -1   95.69    6.90
   2  11  -1  105.99    7.60
   2  11  -1  110.89    6.90
   2  11  -1  121.79    7.90
   2  11  -1  120.69    7.60
   2  11  -1  114.59    7.80
   2  11  -1  117.59    7.30
   2  11  -1  112.39    7.80
   2  11  -1  104.39    7.90
   2  11  -1  104.49    8.20
   2  11  -1  117.29    7.20
  -2 -11   1  122.59    7.20
  -2 -11   1  119.09    7.80
  -2 -11   1  124.79    8.80
  -2 -11   1  130.59    7.50
  -2 -11   1  123.29    7.10
  -2 -11   1  112.19    8.10
  -2 -11   1  116.29    8.00
  -2 -11   1  123.99    8.70
  -2 -11   1  125.49    8.60
  -2 -11   1  119.69    7.70
  -2 -11   1  133.89    8.20
  -2 -11   1  128.89    7.80
  -2 -11   1  139.39    8.30
  -2 -11   1  103.59    7.10
  -2 -11   1  118.69    8.60
   1  11  -1   82.39    6.70
   1  11  -1   88.79    6.40
   1  11  -1   92.49    7.20
   1  11  -1   97.99    6.30
   1  11  -1   91.19    6.80
   1  11  -1   91.29    6.50
   1  11  -1   96.59    6.60
   1  11  -1   90.89    6.70
   1  11  -1   97.09    7.00
   1  11  -1   71.29    7.30
   1  11  -1   88.49    7.10
   1  11  -1  104.29    6.70
   1  11  -1   84.69    8.60
  -1 -11   1  107.69    6.80
  -1 -11   1   96.89    7.20
  -1 -11   1   98.19    7.60
  -1 -11   1   97.79    6.60
  -1 -11   1  104.29    7.70
  -1 -11   1  101.29    7.80
  -1 -11   1  102.59    7.50
  -1 -11   1   96.29    7.60
  -1 -11   1   99.69    7.50
  -1 -11   1   95.39    6.80
  -1 -11   1   97.09    6.90
  -1 -11   1  100.89    6.80
  -1 -11   1  110.89    7.30
   0  11  -1   -1.10    1.70
   0  11  -1    0.70    1.70
   0  11  -1    1.10    2.10
   0  11  -1   -0.60    1.60
   0  11  -1    0.60    1.70
   0  11  -1    1.30    2.00
   0  11  -1    0.10    1.60
   0  11  -1   -1.30    1.70
   0  11  -1   -0.40    1.80
   0  11  -1   -0.20    1.60
   0  11  -1    0.40    1.70
   0  11  -1    1.70    2.10
   0 -11   1    1.40    1.90
   0 -11   1    1.60    2.00
   0 -11   1   -1.30    1.70
   0 -11   1    1.10    1.80
   0 -11   1    2.70    2.30
   0 -11   1   -1.40    1.80
   0 -11   1    1.40    2.00
   0 -11   1    2.90    2.20
   0 -11   1   -1.70    1.70
   0 -11   1    3.80    2.20
   0 -11   1    0.80    1.90
   0 -11   1    1.60    2.00
   0 -11   1    2.30    2.00
   0 -11   1    2.40    1.80
   0 -11   1    1.20    1.70
  -1  11  -1    6.70    2.60
  -1  11  -1    2.00    2.00
  -1  11  -1    5.80    2.40
  -1  11  -1    6.40    2.70
  -1  11  -1    5.90    2.60
  -1  11  -1    6.90    2.60
  -1  11  -1    4.30    2.60
  -1  11  -1    6.90    2.80
  -1  11  -1    2.80    2.50
  -1  11  -1    2.10    1.90
  -1  11  -1    5.50    2.60
   1 -11   1    1.80    2.10
   1 -11   1    6.70    2.70
   1 -11   1    4.40    2.20
   1 -11   1    8.10    3.10
   1 -11   1    4.30    3.30
   1 -11   1    8.00    2.80
   1 -11   1    1.40    1.90
   1 -11   1    2.90    2.20
   1 -11   1    4.40    2.30
   1 -11   1    2.40    2.00
   1 -11   1    3.40    2.30
   1 -11   1    5.90    2.90
   1 -11   1    4.10    2.50
   1 -11   1    4.40    2.50
  -2  11  -1   21.30    4.10
  -2  11  -1   19.00    3.90
  -2  11  -1   22.90    4.30
  -2  11  -1   18.00    3.60
  -2  11  -1   19.10    3.60
  -2  11  -1   26.20    4.20
  -2  11  -1   12.70    3.40
  -2  11  -1   21.60    4.00
  -2  11  -1   15.40    3.40
  -2  11  -1   20.70    4.20
  -2  11  -1   19.20    3.60
   2 -11   1   10.20    2.90
   2 -11   1   22.40    4.20
   2 -11   1   22.60    4.10
   2 -11   1   16.60    3.80
   2 -11   1   20.50    4.10
   2 -11   1   24.30    4.30
   2 -11   1   20.50    4.10
   2 -11   1   20.30    4.00
   2 -11   1   19.30    3.90
   2 -11   1   15.80    3.90
   2 -11   1   24.20    4.60
   2 -11   1   24.10    4.30
   2 -11   1   21.80    4.30
   2 -11   1   22.60    4.10
  -3  11  -1  108.89    7.50
  -3  11  -1   95.69    6.80
  -3  11  -1  108.79    7.20
  -3  11  -1  113.69    7.30
  -3  11  -1  102.79    6.90
  -3  11  -1   98.39    7.00
  -3  11  -1   90.79    7.00
  -3  11  -1   93.29    6.90
  -3  11  -1   97.79    6.30
  -3  11  -1   92.99    7.00
  -3  11  -1  115.99    6.50
  -3  11  -1  106.69    6.20
   3 -11   1  109.19    7.20
   3 -11   1  125.19    7.10
   3 -11   1  106.99    7.50
   3 -11   1  101.99    7.00
   3 -11   1  122.59    8.00
   3 -11   1  111.59    7.60
   3 -11   1  103.19    7.20
   3 -11   1  115.09    7.60
   3 -11   1  114.69    7.50
   3 -11   1  112.29    7.70
   3 -11   1  101.99    6.80
   3 -11   1  101.39    7.20
   3 -11   1  107.89    7.40
   3 -11   1  123.99    6.90
   3 -11   1  119.19    7.60
  -4  11  -1   52.29    6.40
  -4  11  -1   55.49    5.60
  -4  11  -1   52.69    6.20
  -4  11  -1   56.79    6.70
  -4  11  -1   39.00    5.40
  -4  11  -1   34.30    5.20
  -4  11  -1   53.39    6.30
  -4  11  -1   55.19    6.00
  -4  11  -1   46.30    5.80
  -4  11  -1   55.39    6.30
  -4  11  -1   60.59    6.10
   4 -11   1   65.29    4.90
   4 -11   1   58.49    6.20
   4 -11   1   45.70    6.10
   4 -11   1   66.99    7.00
   4 -11   1   66.29    7.10
   4 -11   1   57.69    6.60
   4 -11   1   55.09    6.60
   4 -11   1   58.19    6.20
   4 -11   1   61.29    6.50
   4 -11   1   54.79    6.40
   4 -11   1   73.49    7.70
   4 -11   1   64.29    6.60
   4 -11   1   57.69    6.50
   4 -11   1   82.79    8.20
   4 -11   1   54.49    6.70
   4 -11   1   59.59    6.50
  -5  11  -1   95.99    7.10
  -5  11  -1   86.79    6.90
  -5  11  -1   89.19    7.10
  -5  11  -1   73.09    7.30
  -5  11  -1   81.89    8.20
  -5  11  -1   85.09    6.50
  -5  11  -1   95.79    6.60
  -5  11  -1   74.29    7.90
  -5  11  -1   76.89    7.90
  -5  11  -1   82.19    6.60
   5 -11   1   88.29    6.40
   5 -11   1   78.19    8.20
   5 -11   1   75.29    7.80
   5 -11   1   77.59    8.00
   5 -11   1   86.49    6.50
   5 -11   1   75.19    5.80
   5 -11   1   84.49    6.40
   5 -11   1   87.89    9.10
   5 -11   1   78.79    8.30
   5 -11   1   85.59    7.10
   5 -11   1   80.09    6.10
   5 -11   1   80.59    7.90
   5 -11   1   85.89    6.70
   5 -11   1   82.69    6.40
   5 -11   1   86.89    6.60
   5 -11   1   81.89    5.90
  -6  11  -1   89.49    7.00
  -6  11  -1   90.19    8.80
  -6  11  -1  113.29    8.00
  -6  11  -1  104.99    7.90
  -6  11  -1  104.19    7.80
  -6  11  -1   98.09    7.40
  -6  11  -1   98.59    7.10
  -6  11  -1  101.79    7.70
  -6  11  -1   84.89    8.40
  -6  11  -1   98.59    7.20
   6 -11   1   83.49    8.50
   6 -11   1   86.89    6.50
   6 -11   1   95.39    7.30
   6 -11   1   83.09    8.50
   6 -11   1  101.69   12.60
   6 -11   1  100.19    9.70
   6 -11   1   84.19    8.70
   6 -11   1   77.99    8.20
   6 -11   1   85.29    6.60
   6 -11   1   82.49    8.00
   6 -11   1   74.09    7.20
   6 -11   1   82.39    7.80
   6 -11   1   93.49    9.10
   6 -11   1   83.79    8.40
   6 -11   1   94.59    6.60
   6 -11   1   71.69    7.50
  -7  11  -1    9.00    3.40
  -7  11  -1   17.60    4.40
  -7  11  -1   13.20    4.00
  -7  11  -1   11.50    3.70
  -7  11  -1   13.10    3.80
  -7  11  -1   16.50    4.20
  -7  11  -1   18.30    4.60
  -7  11  -1   16.10    4.10
  -7  11  -1   17.10    4.30
  -7  11  -1   14.30    3.50
   7 -11   1   12.80    4.10
   7 -11   1   11.70    3.80
   7 -11   1   16.30    4.40
   7 -11   1   11.20    3.40
   7 -11   1   13.70    3.60
   7 -11   1   17.20    4.70
   7 -11   1   11.80    3.90
   7 -11   1   13.20    3.30
   7 -11   1    7.70    3.30
   7 -11   1   12.00    4.20
  -8  11  -1   68.59    8.20
  -8  11  -1   58.29    7.70
  -8  11  -1   73.69    8.40
  -8  11  -1   55.59    7.20
  -8  11  -1   55.59    6.70
  -8  11  -1   50.99    7.10
  -8  11  -1   60.29    7.80
   8 -11   1   51.79    6.70
   8 -11   1   49.10    6.90
   8 -11   1   46.90    7.10
   8 -11   1   62.19    7.40
   8 -11   1   53.69    6.40
   8 -11   1   47.70    7.00
   8 -11   1   44.20    6.60
   8 -11   1   60.79    7.90
  -9  11  -1   17.20    4.70
  -9  11  -1   24.60    6.90
  -9  11  -1   13.10    4.60
  -9  11  -1   18.70    4.60
  -9  11  -1   18.80    4.30
  -9  11  -1   16.60    4.50
  -9  11  -1   25.00    5.50
   9 -11   1   19.30    4.00
   9 -11   1   15.00    4.70
   9 -11   1   13.80    4.30
   9 -11   1   21.00    4.80
   9 -11   1   11.10    4.40
   9 -11   1   18.50    5.00
   9 -11   1   18.80    4.90
   9 -11   1   14.90    4.50
 -10  11  -1    1.50    3.00
 -10  11  -1    5.00    3.50
 -10  11  -1    6.80    3.10
 -10  11  -1    2.20    3.00
 -10  11  -1    2.50    3.10
 -10  11  -1    4.90    3.50
  10 -11   1    2.30    3.50
  10 -11   1   11.60    4.40
  10 -11   1    6.40    3.90
  10 -11   1    4.60    3.30
  10 -11   1    8.00    3.90
  10 -11   1    7.00    4.20
  10 -11   1    1.60    3.00
   9  10  -1    5.20    4.20
   9  10  -1    1.80    3.60
   9  10  -1    3.10    3.80
   9  10  -1    3.30    3.30
   9  10  -1    2.20    3.40
   9  10  -1    5.90    4.40
   9  10  -1    2.40    3.80
  -9 -10   1    2.80    2.60
  -9 -10   1   -2.10    3.00
  -9 -10   1    3.00    3.70
  -9 -10   1    1.30    3.10
  -9 -10   1    8.50    4.10
  -9 -10   1    1.30    3.30
  -9 -10   1    2.00    3.60
   8  10  -1   31.90    5.20
   8  10  -1   22.90    5.10
   8  10  -1   36.60    6.90
   8  10  -1   28.30    5.90
   8  10  -1   33.20    6.70
   8  10  -1   37.20    7.00
   8  10  -1   42.80    7.10
   8  10  -1   24.20    5.80
   8  10  -1   27.50    5.90
  -8 -10   1   34.70    6.30
  -8 -10   1   49.70    7.70
  -8 -10   1   47.40    6.90
  -8 -10   1   32.10    6.30
  -8 -10   1   34.90    6.70
  -8 -10   1   37.30    5.60
  -8 -10   1   37.60    6.60
  -8 -10   1   33.30    7.50
   7  10  -1   45.30    7.10
   7  10  -1   43.30    7.10
   7  10  -1   41.70    6.80
   7  10  -1   45.80    5.90
   7  10  -1   52.89    8.00
   7  10  -1   68.99    8.50
   7  10  -1   55.89    7.30
   7  10  -1   42.70    6.90
   7  10  -1   58.99    8.40
  -7 -10   1   69.59    9.00
  -7 -10   1   64.59    8.20
  -7 -10   1   55.89    7.30
  -7 -10   1   48.00    6.70
  -7 -10   1   56.19    7.90
  -7 -10   1   53.49    7.00
  -7 -10   1   48.30    7.00
  -7 -10   1   48.00    6.20
  -7 -10   1   53.69    7.80
  -7 -10   1   57.99    7.90
   6  10  -1   39.00    6.10
   6  10  -1   36.00    5.60
   6  10  -1   42.70    6.90
   6  10  -1   48.10    6.70
   6  10  -1   30.80    4.80
   6  10  -1   47.20    6.60
   6  10  -1   42.50    6.80
   6  10  -1   55.19    9.80
   6  10  -1   40.20    6.20
   6  10  -1   49.40    7.20
   6  10  -1   40.00    6.50
  -6 -10   1   58.59    7.60
  -6 -10   1   44.40    6.90
  -6 -10   1   57.79    7.20
  -6 -10   1   54.39    7.50
  -6 -10   1   50.99    7.20
  -6 -10   1   44.30    6.80
  -6 -10   1   61.09    7.60
  -6 -10   1   40.40    5.70
  -6 -10   1   43.80    6.40
  -6 -10   1   42.70    6.50
  -6 -10   1   59.89    7.20
  -6 -10   1   54.59    7.00
   5  10  -1    1.10    2.00
   5  10  -1   -0.80    2.20
   5  10  -1    0.70    2.10
   5  10  -1    1.40    2.30
   5  10  -1    3.70    2.80
   5  10  -1    1.20    2.30
   5  10  -1    1.10    2.00
   5  10  -1    2.00    2.20
   5  10  -1    0.10    2.30
   5  10  -1    1.20    2.10
   5  10  -1    2.10    2.20
   5  10  -1    2.50    2.40
   5  10  -1   -1.30    1.90
  -5 -10   1    0.40    2.20
  -5 -10   1    2.90    2.30
  -5 -10   1    0.30    2.10
  -5 -10   1    3.30    2.60
  -5 -10   1    0.90    1.80
  -5 -10   1    0.60    2.30
  -5 -10   1   -0.90    2.10
  -5 -10   1    2.80    2.50
  -5 -10   1    2.80    2.90
  -5 -10   1   -2.40    1.70
  -5 -10   1    2.90    2.60
  -5 -10   1    1.50    2.70
   4  10  -1   40.00    5.70
   4  10  -1   31.20    5.40
   4  10  -1   40.10    6.00
   4  10  -1   31.10    4.60
   4  10  -1   37.70    5.70
   4  10  -1   44.20    5.80
   4  10  -1   37.10    5.80
   4  10  -1   38.90    5.60
   4  10  -1   29.00    5.00
   4  10  -1   43.40    4.80
   4  10  -1   39.60    6.20
   4  10  -1   34.40    4.90
   4  10  -1   37.60    5.50
   4  10  -1   44.30    5.90
   4  10  -1   43.10    4.90
   4  10  -1   37.20    5.60
  -4 -10   1   39.40    5.90
  -4 -10   1   48.10    6.50
  -4 -10   1   35.00    5.40
  -4 -10   1   39.00    5.80
  -4 -10   1   31.80    4.80
  -4 -10   1   29.30    4.90
  -4 -10   1   33.60    5.20
  -4 -10   1   39.40    5.80
  -4 -10   1   45.60    6.30
  -4 -10   1   33.30    5.20
  -4 -10   1   30.40    6.10
  -4 -10   1   44.00    6.00
  -4 -10   1   31.90    5.30
   3  10  -1  166.88    8.20
   3  10  -1  166.78    9.30
   3  10  -1  150.48    8.00
   3  10  -1  143.89    8.50
   3  10  -1  132.69    8.60
   3  10  -1  153.88    9.70
   3  10  -1  165.68    9.60
   3  10  -1  132.59    8.60
   3  10  -1  145.49    7.70
   3  10  -1  174.48    8.90
   3  10  -1  130.29    8.40
   3  10  -1  136.89    8.60
   3  10  -1  167.78    9.20
   3  10  -1  152.28    8.40
   3  10  -1  152.68    8.50
   3  10  -1  167.68    8.40
  -3 -10   1  153.28    9.00
  -3 -10   1  166.28    9.60
  -3 -10   1  158.58    9.40
  -3 -10   1  160.98    8.20
  -3 -10   1  161.18    9.20
  -3 -10   1  152.18    8.80
  -3 -10   1  167.78    9.80
  -3 -10   1  150.88    9.50
  -3 -10   1  161.08    9.50
  -3 -10   1  159.28    8.50
  -3 -10   1  157.88    8.40
  -3 -10   1  151.88    9.20
  -3 -10   1  169.28    8.20
  -3 -10   1  173.78    9.70
   2  10  -1  289.17   11.20
   2  10  -1  284.47   11.40
   2  10  -1  294.97   12.70
   2  10  -1  271.07   12.60
   2  10  -1  292.17   11.90
   2  10  -1  304.37   11.70
   2  10  -1  298.37   11.90
   2  10  -1  299.27   11.40
   2  10  -1  287.37   12.70
   2  10  -1  275.37   12.30
   2  10  -1  282.07   12.30
   2  10  -1  290.77   11.70
   2  10  -1  295.97   12.60
   2  10  -1  281.07   13.30
   2  10  -1  285.47   12.30
  -2 -10   1  301.77   12.30
  -2 -10   1  287.77   12.70
  -2 -10   1  316.77   12.60
  -2 -10   1  319.47   13.70
  -2 -10   1  328.87   12.20
  -2 -10   1  314.27   12.20
  -2 -10   1  318.07   13.00
  -2 -10   1  313.37   13.00
  -2 -10   1  299.97   13.40
  -2 -10   1  312.07   13.50
  -2 -10   1  302.37   11.90
  -2 -10   1  313.77   13.30
  -2 -10   1  282.37   12.40
  -2 -10   1  301.67   13.60
  -2 -10   1  304.57   13.20
  -2 -10   1  315.47   11.60
   1  10  -1   11.10    3.20
   1  10  -1   13.20    3.00
   1  10  -1   12.50    3.30
   1  10  -1   14.60    3.40
   1  10  -1    5.10    2.40
   1  10  -1   16.60    4.70
   1  10  -1   17.70    3.60
   1  10  -1   17.00    5.00
   1  10  -1   17.10    3.60
   1  10  -1    9.60    2.80
   1  10  -1    8.80    2.70
   1  10  -1   16.60    3.30
   1  10  -1    6.70    2.90
   1  10  -1   12.80    2.80
   1  10  -1   17.40    3.50
  -1 -10   1    9.80    2.80
  -1 -10   1   20.90    3.40
  -1 -10   1   15.60    3.80
  -1 -10   1   17.90    3.60
  -1 -10   1   11.40    3.00
  -1 -10   1   22.00    4.10
  -1 -10   1   22.10    3.80
  -1 -10   1   12.20    2.60
  -1 -10   1   18.90    3.80
  -1 -10   1   12.30    3.40
  -1 -10   1   16.30    3.30
  -1 -10   1   22.50    3.50
  -1 -10   1   17.80    4.00
  -1 -10   1   16.10    3.20
  -1 -10   1   17.10    3.90
  -1 -10   1   14.70    2.90
  -1 -10   1   16.00    3.50
  -1 -10   1   19.40    3.50
   0  10  -1   77.59    5.90
   0  10  -1   87.79    8.20
   0  10  -1   86.29    5.80
   0  10  -1   88.89    6.20
   0  10  -1   84.39    5.90
   0  10  -1   84.79    6.00
   0  10  -1   83.99    6.10
   0  10  -1   86.19    6.50
   0  10  -1   82.39    5.70
   0  10  -1   84.29    6.50
   0  10  -1   89.09    5.90
   0  10  -1   87.29    5.90
   0 -10   1   76.29    7.30
   0 -10   1   80.59    8.00
   0 -10   1   80.99    5.60
   0 -10   1   84.29    5.90
   0 -10   1   80.59    5.20
   0 -10   1   81.69    6.30
   0 -10   1   80.09    5.30
   0 -10   1   79.19    5.70
   0 -10   1   83.59    5.90
   0 -10   1   72.59    5.30
   0 -10   1   69.59    5.10
   0 -10   1   85.59    6.60
   0 -10   1   72.89    5.70
   0 -10   1   65.49    6.60
   0 -10   1   88.39    6.30
   0 -10   1   79.49    6.30
  -1  10  -1  441.56   16.00
  -1  10  -1  474.25   15.90
  -1  10  -1  460.25   13.90
  -1  10  -1  454.05   16.20
  -1  10  -1  460.85   14.00
  -1  10  -1  472.45   16.20
  -1  10  -1  434.36   16.00
  -1  10  -1  456.45   15.60
  -1  10  -1  471.05   15.70
  -1  10  -1  475.45   16.10
  -1  10  -1  480.75   17.30
  -1  10  -1  446.66   16.00
  -1  10  -1  457.05   16.70
   1 -10   1  451.85   16.20
   1 -10   1  458.35   16.00
   1 -10   1  452.55   15.20
   1 -10   1  435.36   15.20
   1 -10   1  465.35   16.80
   1 -10   1  457.35   14.50
   1 -10   1  439.86   16.40
   1 -10   1  461.95   14.80
   1 -10   1  462.15   16.10
   1 -10   1  453.35   16.10
   1 -10   1  455.65   15.90
   1 -10   1  464.25   16.90
   1 -10   1  434.36   16.80
   1 -10   1  468.65   16.20
   1 -10   1  459.85   16.30
   1 -10   1  472.05   16.00
  -2  10  -1   71.99    4.50
  -2  10  -1   63.99    6.40
  -2  10  -1   71.99    5.60
  -2  10  -1   71.79    5.80
  -2  10  -1   69.09    5.50
  -2  10  -1   69.79    5.30
  -2  10  -1   74.09    5.60
  -2  10  -1   72.39    5.40
  -2  10  -1   71.79    4.70
  -2  10  -1   77.39    5.70
  -2  10  -1   88.89    6.20
  -2  10  -1   72.19    5.70
  -2  10  -1   70.89    5.10
   2 -10   1   80.99    6.20
   2 -10   1   77.49    5.90
   2 -10   1   80.59    5.90
   2 -10   1   76.49    5.90
   2 -10   1   77.69    5.90
   2 -10   1   86.59    5.90
   2 -10   1   88.29    5.90
   2 -10   1   90.39    6.30
   2 -10   1   82.89    6.20
   2 -10   1   86.79    6.00
   2 -10   1   85.19    4.60
   2 -10   1   77.39    6.10
   2 -10   1   86.59    6.60
   2 -10   1   84.39    6.00
   2 -10   1   77.39    5.00
   2 -10   1   79.39    5.70
  -3  10  -1    1.40    1.80
  -3  10  -1    1.50    1.70
  -3  10  -1    3.80    2.00
  -3  10  -1    3.60    1.90
  -3  10  -1    1.50    1.80
  -3  10  -1    1.50    1.80
  -3  10  -1    3.90    2.00
  -3  10  -1    4.60    2.20
  -3  10  -1    4.20    2.20
  -3  10  -1    3.80    2.10
  -3  10  -1    1.80    2.00
  -3  10  -1    4.10    2.20
   3 -10   1    1.20    1.90
   3 -10   1    1.10    1.90
   3 -10   1    2.40    1.90
   3 -10   1    3.50    1.90
   3 -10   1    2.80    1.70
   3 -10   1    3.60    2.10
   3 -10   1    1.60    1.90
   3 -10   1    0.70    1.60
   3 -10   1    2.20    1.80
   3 -10   1    1.70    1.90
   3 -10   1    5.20    1.90
   3 -10   1    3.30    2.00
   3 -10   1    2.20    2.00
   3 -10   1    4.40    2.10
   3 -10   1    3.00    2.10
   3 -10   1    2.70    2.10
   3 -10   1    3.80    2.20
  -4  10  -1    2.90    2.10
  -4  10  -1    2.40    1.80
  -4  10  -1    2.40    2.00
  -4  10  -1    1.10    1.90
  -4  10  -1    3.70    2.10
  -4  10  -1    3.00    2.00
  -4  10  -1    0.90    2.10
  -4  10  -1    0.20    1.70
  -4  10  -1   -0.20    1.40
  -4  10  -1    3.20    2.20
  -4  10  -1    2.90    2.30
   4 -10   1    0.30    1.70
   4 -10   1    4.00    2.40
   4 -10   1    0.70    1.90
   4 -10   1    2.20    2.10
   4 -10   1    3.30    2.20
   4 -10   1    2.60    2.10
   4 -10   1    1.00    1.80
   4 -10   1    4.50    2.30
   4 -10   1    0.70    1.80
   4 -10   1    1.50    1.70
   4 -10   1    1.30    1.50
   4 -10   1    3.50    1.90
   4 -10   1    4.60    2.00
   4 -10   1    0.70    1.50
   4 -10   1    6.00    2.80
   4 -10   1    0.20    1.80
   4 -10   1    2.60    2.10
  -5  10  -1   70.39    6.90
  -5  10  -1   68.59    7.10
  -5  10  -1   63.09    6.50
  -5  10  -1   49.10    5.80
  -5  10  -1   69.69    7.00
  -5  10  -1   62.89    7.10
  -5  10  -1   60.19    6.50
  -5  10  -1   52.59    6.20
  -5  10  -1   62.99    5.00
  -5  10  -1   55.59    6.50
  -5  10  -1   56.19    6.60
   5 -10   1   53.29    5.70
   5 -10   1   67.59    5.30
   5 -10   1   64.99    6.70
   5 -10   1   51.89    5.60
   5 -10   1   50.89    6.00
   5 -10   1   43.70    6.20
   5 -10   1   54.49    6.30
   5 -10   1   45.00    5.80
   5 -10   1   64.89    6.90
   5 -10   1   57.49    6.00
   5 -10   1   54.19    5.90
   5 -10   1   60.99    6.70
   5 -10   1   52.99    5.70
   5 -10   1   61.19    6.80
   5 -10   1   55.99    5.90
   5 -10   1   65.79    7.20
   5 -10   1   61.69    6.00
  -6  10  -1   73.89    7.60
  -6  10  -1   81.29    8.30
  -6  10  -1   77.89    7.70
  -6  10  -1   71.79    7.40
  -6  10  -1   85.99    6.50
  -6  10  -1   68.89    7.40
  -6  10  -1   71.69    5.80
  -6  10  -1   75.19    6.10
  -6  10  -1   82.49    6.70
  -6  10  -1   75.39    7.50
   6 -10   1   82.49    7.90
   6 -10   1   78.99    6.40
   6 -10   1   81.69    5.80
   6 -10   1   61.49    6.90
   6 -10   1   81.09    6.10
   6 -10   1   76.39    7.90
   6 -10   1   81.89    5.60
   6 -10   1   78.99    5.50
   6 -10   1   73.39    8.00
   6 -10   1   68.49    7.80
   6 -10   1   66.29    7.50
   6 -10   1   79.19    5.90
   6 -10   1   80.99    6.10
   6 -10   1   65.09    7.40
   6 -10   1   73.29    5.80
   6 -10   1   67.19    6.60
  -7  10  -1   79.09    8.80
  -7  10  -1   84.19    8.70
  -7  10  -1   76.19    8.20
  -7  10  -1   73.79    7.50
  -7  10  -1   72.99    6.00
  -7  10  -1   63.19    7.50
  -7  10  -1   78.99    8.20
  -7  10  -1   78.59    8.10
  -7  10  -1   78.89    8.40
   7 -10   1   75.79    8.60
   7 -10   1   60.89    6.80
   7 -10   1   80.49    8.30
   7 -10   1   64.89    7.10
   7 -10   1   48.10    5.60
   7 -10   1   67.09    7.50
   7 -10   1   60.79    7.60
   7 -10   1   65.89    7.70
   7 -10   1   73.29    7.80
   7 -10   1   77.39    8.20
  -8  10  -1   59.79    7.70
  -8  10  -1   62.39    7.60
  -8  10  -1   62.79    7.50
  -8  10  -1   60.39    7.90
  -8  10  -1   62.99    6.90
  -8  10  -1   59.69    7.40
  -8  10  -1   70.89    8.10
   8 -10   1   66.39    7.90
   8 -10   1   70.19    7.90
   8 -10   1   64.29    7.70
   8 -10   1   57.79    7.10
   8 -10   1   74.89    8.20
   8 -10   1   58.29    7.60
   8 -10   1   60.59    6.80
   8 -10   1   58.89    6.40
   8 -10   1   61.99    7.70
  -9  10  -1   71.59    8.20
  -9  10  -1   76.29    9.10
  -9  10  -1   63.19    7.80
  -9  10  -1   59.89    6.60
  -9  10  -1   59.79    7.90
  -9  10  -1   89.49    9.40
  -9  10  -1   70.59    8.30
   9 -10   1   65.69    8.30
   9 -10   1   74.19    8.60
   9 -10   1   53.99    6.00
   9 -10   1   72.49    8.00
   9 -10   1   76.89    8.60
   9 -10   1   65.99    7.80
   9 -10   1   70.79    8.30
   9 -10   1   82.79    9.40
   9 -10   1   69.89    8.30
 -10  10  -1    2.90    2.20
 -10  10  -1   -0.30    2.50
 -10  10  -1    0.10    2.60
 -10  10  -1    2.90    3.20
 -10  10  -1    2.80    3.10
 -10  10  -1    4.10    3.50
  10 -10   1    5.30    1.90
  10 -10   1    0.60    2.50
  10 -10   1   -0.90    2.50
  10 -10   1   -1.30    2.10
  10 -10   1   -2.40    2.50
  10 -10   1   -1.50    2.60
  10 -10   1    0.10    3.80
  10 -10   1   -0.90    2.10
  10 -10   1   -0.50    2.60
 -11  10  -1    2.70    3.50
 -11  10  -1    0.60    2.90
  11 -10   1    7.40    3.70
  11 -10   1    7.80    3.60
   9   9  -1   12.80    4.90
   9   9  -1    7.40    4.20
   9   9  -1    5.90    2.80
   9   9  -1   18.70    5.60
   9   9  -1    9.70    4.10
   9   9  -1    8.50    4.00
   9   9  -1   16.70    5.30
   9   9  -1   11.10    4.30
  -9  -9   1   13.20    4.30
  -9  -9   1   11.20    4.40
  -9  -9   1   13.70    4.70
  -9  -9   1   12.70    4.20
  -9  -9   1   10.00    3.90
  -9  -9   1    4.40    3.30
  -9  -9   1    7.50    3.30
   8   9  -1    4.40    3.10
   8   9  -1    8.30    3.60
   8   9  -1    9.90    4.20
   8   9  -1   -0.90    2.70
   8   9  -1    2.10    2.60
   8   9  -1    2.90    3.00
   8   9  -1    4.70    3.40
   8   9  -1    3.20    2.30
   8   9  -1    2.00    3.10
  -8  -9   1   10.10    3.70
  -8  -9   1    6.40    3.30
  -8  -9   1    7.20    3.70
  -8  -9   1    9.20    4.00
  -8  -9   1    6.90    2.80
  -8  -9   1    9.80    4.20
  -8  -9   1   11.40    4.20
  -8  -9   1    4.40    3.50
  -8  -9   1    7.90    3.50
   7   9  -1   39.80    6.70
   7   9  -1   37.10    6.40
   7   9  -1   51.69    7.20
   7   9  -1   38.10    6.50
   7   9  -1   47.70    7.00
   7   9  -1   39.90    6.10
   7   9  -1   36.00    5.10
   7   9  -1   35.40    6.30
   7   9  -1   38.90    6.50
   7   9  -1   37.60    6.50
  -7  -9   1   55.89    6.70
  -7  -9   1   59.79    7.70
  -7  -9   1   56.29    6.80
  -7  -9   1   49.80    6.70
  -7  -9   1   33.80    6.10
  -7  -9   1   44.20    6.90
  -7  -9   1   43.10    7.00
  -7  -9   1   51.79    6.70
  -7  -9   1   37.70    5.70
  -7  -9   1   56.29    7.50
   6   9  -1   50.79    6.80
   6   9  -1   44.20    6.10
   6   9  -1   43.80    6.60
   6   9  -1   33.80    5.80
   6   9  -1   54.99    7.30
   6   9  -1   33.10    5.60
   6   9  -1   47.50    5.80
   6   9  -1   36.80    6.10
   6   9  -1   29.00    5.20
   6   9  -1   48.90    6.20
   6   9  -1   34.30    5.70
   6   9  -1   45.30    6.20
  -6  -9   1   49.60    7.10
  -6  -9   1   37.70    5.70
  -6  -9   1   44.00    6.50
  -6  -9   1   37.00    5.70
  -6  -9   1   45.80    6.50
  -6  -9   1   47.40    7.10
  -6  -9   1   35.20    5.50
  -6  -9   1   42.70    6.00
  -6  -9   1   52.79    7.20
  -6  -9   1   32.80    5.40
  -6  -9   1   49.30    5.90
  -6  -9   1   33.50    5.60
   5   9  -1  101.79    7.60
   5   9  -1  118.59    8.60
   5   9  -1  119.99    8.00
   5   9  -1  106.09    7.80
   5   9  -1  115.69    6.40
   5   9  -1  117.49    7.70
   5   9  -1  116.39    8.10
   5   9  -1  112.59    7.30
   5   9  -1  124.39    7.90
   5   9  -1  120.59    7.80
   5   9  -1  117.89    7.40
   5   9  -1  104.99    7.90
   5   9  -1  110.59    8.10
   5   9  -1  123.99    8.40
   5   9  -1  123.49    6.50
   5   9  -1  111.59    7.80
  -5  -9   1  115.59    8.10
  -5  -9   1  108.09    7.30
  -5  -9   1   97.59    7.40
  -5  -9   1  105.59    8.10
  -5  -9   1  112.49    7.90
  -5  -9   1  102.29    7.90
  -5  -9   1  104.89    7.40
  -5  -9   1  105.19    7.60
  -5  -9   1   99.59    7.80
  -5  -9   1  112.19    7.70
  -5  -9   1  104.29    7.40
  -5  -9   1  111.69    7.50
   4   9  -1  129.09    8.30
   4   9  -1  121.29    7.90
   4   9  -1  133.79    8.50
   4   9  -1  125.59    7.90
   4   9  -1  136.29    6.80
   4   9  -1  142.79    8.50
   4   9  -1  141.99    8.00
   4   9  -1  131.69    8.30
   4   9  -1  148.29    8.10
   4   9  -1  137.89    8.10
   4   9  -1  138.59    8.90
   4   9  -1  131.09    8.20
   4   9  -1  129.09    7.70
   4   9  -1  135.79    7.00
   4   9  -1  128.89    7.60
   4   9  -1  151.78    7.80
  -4  -9   1  121.79    8.10
  -4  -9   1  147.89    9.10
  -4  -9   1  153.18    7.40
  -4  -9   1  157.18    9.30
  -4  -9   1  142.89    8.90
  -4  -9   1  152.58    8.90
  -4  -9   1  153.58    8.50
  -4  -9   1  145.09    8.60
  -4  -9   1  145.79    8.50
  -4  -9   1  150.28    7.20
  -4  -9   1  140.99    8.70
  -4  -9   1  148.09    8.70
  -4  -9   1  153.88    8.90
   3   9  -1  103.99    7.00
   3   9  -1  107.09    7.60
   3   9  -1  104.89    6.60
   3   9  -1   99.69    6.60
   3   9  -1   88.59    6.10
   3   9  -1   90.09    5.90
   3   9  -1   94.79    5.80
   3   9  -1   89.99    6.40
   3   9  -1  100.59    5.80
   3   9  -1  105.69    6.60
   3   9  -1   95.19    6.60
   3   9  -1   78.19    6.20
   3   9  -1   97.09    7.00
   3   9  -1  101.49    6.10
   3   9  -1   76.39    6.00
   3   9  -1   94.49    6.50
  -3  -9   1   85.89    5.60
  -3  -9   1  100.19    6.80
  -3  -9   1   97.59    6.90
  -3  -9   1   82.49    6.50
  -3  -9   1   94.39    7.00
  -3  -9   1   93.89    6.60
  -3  -9   1   95.39    6.70
  -3  -9   1  100.49    6.90
  -3  -9   1  104.29    6.40
  -3  -9   1  101.19    5.90
  -3  -9   1   99.69    5.50
  -3  -9   1  100.79    7.10
  -3  -9   1   97.99    6.70
  -3  -9   1   89.79    6.40
  -3  -9   1  109.19    6.90
   2   9  -1    5.90    2.20
   2   9  -1    1.10    1.70
   2   9  -1    4.60    2.00
   2   9  -1    6.60    2.70
   2   9  -1    4.20    2.00
   2   9  -1    7.30    2.30
   2   9  -1    0.00    1.40
   2   9  -1    1.50    1.50
   2   9  -1    3.20    2.00
   2   9  -1    4.00    1.80
   2   9  -1    2.20    1.80
   2   9  -1    2.40    2.00
   2   9  -1   -0.50    1.60
   2   9  -1    4.20    2.10
   2   9  -1    6.20    2.40
  -2  -9   1    3.60    1.90
  -2  -9   1    3.50    2.10
  -2  -9   1    3.70    1.90
  -2  -9   1    0.70    1.60
  -2  -9   1    1.40    1.70
  -2  -9   1    0.80    1.60
  -2  -9   1    3.80    2.10
  -2  -9   1   -0.50    1.60
  -2  -9   1    1.30    1.70
  -2  -9   1    2.80    1.50
  -2  -9   1    0.90    1.70
  -2  -9   1   -0.10    1.60
  -2  -9   1    5.50    2.30
  -2  -9   1    5.90    2.40
  -2  -9   1    3.60    2.00
  -2  -9   1    3.80    2.10
   1   9  -1   18.60    2.90
   1   9  -1   10.50    2.70
   1   9  -1   18.50    3.60
   1   9  -1    6.40    2.50
   1   9  -1   12.80    2.70
   1   9  -1    8.40    2.70
   1   9  -1   14.60    3.00
   1   9  -1    9.30    2.70
   1   9  -1   13.00    2.80
   1   9  -1   14.30    3.00
   1   9  -1   16.30    3.10
   1   9  -1   15.80    3.00
   1   9  -1   14.80    2.70
   1   9  -1   13.30    2.80
   1   9  -1   11.40    3.00
   1   9  -1   10.30    2.60
  -1  -9   1    7.80    2.50
  -1  -9   1    7.20    2.40
  -1  -9   1   13.70    2.70
  -1  -9   1   12.60    2.90
  -1  -9   1    8.80    2.60
  -1  -9   1    9.80    2.30
  -1  -9   1   16.90    3.20
  -1  -9   1   13.40    2.60
  -1  -9   1   11.50    3.00
  -1  -9   1   12.00    3.00
  -1  -9   1    8.30    2.70
  -1  -9   1   10.10    2.60
  -1  -9   1    8.20    2.40
  -1  -9   1   12.10    2.80
  -1  -9   1   10.60    3.00
  -1  -9   1   10.30    2.50
  -1  -9   1   13.30    3.30
  -1  -9   1   14.30    2.60
   0   9  -1  166.18    8.60
   0   9  -1  159.38    8.60
   0   9  -1  167.58    8.20
   0   9  -1  152.08    7.60
   0   9  -1  162.98    6.80
   0   9  -1  180.98    8.50
   0   9  -1  164.58    6.30
   0   9  -1  167.28    7.80
   0   9  -1  177.18    8.30
   0   9  -1  163.08    8.00
   0   9  -1  153.98    7.90
   0   9  -1  172.58    8.00
   0   9  -1  167.18    8.60
   0   9  -1  173.98    6.40
   0   9  -1  167.78    6.90
   0  -9   1  144.09    8.20
   0  -9   1  144.59    8.30
   0  -9   1  155.48    7.40
   0  -9   1  148.99    7.10
   0  -9   1  154.08    7.10
   0  -9   1  147.29    7.40
   0  -9   1  162.38    8.40
   0  -9   1  161.98    7.90
   0  -9   1  144.09    8.00
   0  -9   1  148.99    6.90
   0  -9   1  145.39    7.90
   0  -9   1  145.39    8.20
   0  -9   1  164.28    7.90
   0  -9   1  158.48    7.90
   0  -9   1  152.18    6.80
   0  -9   1  159.08    8.10
   0  -9   1  150.98    6.50
   0  -9   1  158.88    7.50
   0  -9   1  152.08    7.00
   0  -9   1  139.99    7.50
  -1   9  -1  321.37   12.30
  -1   9  -1  314.87   12.60
  -1   9  -1  329.47   12.90
  -1   9  -1  327.17   12.20
  -1   9  -1  325.17   12.20
  -1   9  -1  330.57   12.40
  -1   9  -1  322.77   12.10
  -1   9  -1  312.67   10.30
  -1   9  -1  333.17   10.50
  -1   9  -1  322.27   12.20
  -1   9  -1  321.27   11.90
  -1   9  -1  320.77   11.80
  -1   9  -1  327.97   11.00
  -1   9  -1  301.87   12.10
  -1   9  -1  317.87   11.60
   1  -9   1  351.76   11.60
   1  -9   1  355.66   13.80
   1  -9   1  351.26   12.30
   1  -9   1  360.16   11.20
   1  -9   1  369.46   13.20
   1  -9   1  353.86   11.60
   1  -9   1  340.07   11.20
   1  -9   1  358.46   12.90
   1  -9   1  355.06   12.40
   1  -9   1  339.77   13.40
   1  -9   1  348.17   11.80
   1  -9   1  347.47   13.10
   1  -9   1  356.16   13.00
   1  -9   1  336.07   13.30
   1  -9   1  365.56   13.50
   1  -9   1  356.86   12.80
   1  -9   1  349.27   12.70
   1  -9   1  354.96   13.00
   1  -9   1  342.27   12.70
  -2   9  -1  259.47   10.70
  -2   9  -1  273.47   10.80
  -2   9  -1  291.27   11.30
  -2   9  -1  272.57   10.90
  -2   9  -1  273.37    9.90
  -2   9  -1  289.37   10.50
  -2   9  -1  274.67   11.30
  -2   9  -1  276.77    9.80
  -2   9  -1  265.47   11.20
  -2   9  -1  269.87   11.10
  -2   9  -1  269.17   11.00
  -2   9  -1  262.77   10.90
   2  -9   1  263.77   10.70
   2  -9   1  283.57   10.90
   2  -9   1  281.77   11.30
   2  -9   1  258.07   10.90
   2  -9   1  286.77   10.20
   2  -9   1  273.07   11.30
   2  -9   1  270.07   11.30
   2  -9   1  298.87   11.40
   2  -9   1  283.17    9.50
   2  -9   1  273.37   11.20
   2  -9   1  267.17   11.30
   2  -9   1  264.57   11.50
   2  -9   1  275.47   11.50
   2  -9   1  284.77    9.30
   2  -9   1  270.87   10.80
   2  -9   1  279.77   11.20
   2  -9   1  277.47   10.70
   2  -9   1  279.77    9.30
   2  -9   1  282.27    9.50
  -3   9  -1   28.20    4.10
  -3   9  -1   26.70    3.60
  -3   9  -1   29.40    4.30
  -3   9  -1   23.90    3.80
  -3   9  -1   24.30    3.80
  -3   9  -1   16.70    3.30
  -3   9  -1   22.50    3.40
  -3   9  -1   26.40    4.10
  -3   9  -1   26.20    3.60
  -3   9  -1   28.70    3.80
  -3   9  -1   30.30    4.10
  -3   9  -1   27.10    3.90
   3  -9   1   27.00    3.50
   3  -9   1   22.00    3.80
   3  -9   1   26.70    3.90
   3  -9   1   17.10    3.30
   3  -9   1   23.50    3.90
   3  -9   1   19.60    3.10
   3  -9   1   26.00    3.70
   3  -9   1   16.00    3.00
   3  -9   1   17.20    3.50
   3  -9   1   19.90    3.50
   3  -9   1   21.60    3.80
   3  -9   1   16.70    3.30
   3  -9   1   17.80    3.50
   3  -9   1   24.70    3.90
   3  -9   1   20.40    3.60
   3  -9   1   14.40    3.20
   3  -9   1   18.90    2.90
  -4   9  -1    3.80    2.20
  -4   9  -1    6.20    2.10
  -4   9  -1    8.00    2.60
  -4   9  -1    9.10    2.40
  -4   9  -1    4.40    2.20
  -4   9  -1    7.10    2.20
  -4   9  -1    7.70    2.50
  -4   9  -1    6.40    2.20
  -4   9  -1    2.70    1.90
  -4   9  -1    5.90    2.10
  -4   9  -1    6.50    2.50
  -4   9  -1    4.90    2.20
   4  -9   1    2.40    1.80
   4  -9   1    5.40    1.90
   4  -9   1    2.70    1.70
   4  -9   1    0.10    1.50
   4  -9   1    0.60    1.60
   4  -9   1    4.70    2.10
   4  -9   1    4.10    1.70
   4  -9   1    3.50    1.70
   4  -9   1    4.60    1.80
   4  -9   1    3.20    1.90
   4  -9   1    4.90    2.20
   4  -9   1    4.20    2.00
   4  -9   1    1.80    1.90
   4  -9   1    3.20    1.80
   4  -9   1    3.90    2.00
   4  -9   1    1.90    2.10
   4  -9   1    3.10    1.90
   4  -9   1    4.80    2.10
   4  -9   1    4.00    2.10
   4  -9   1    3.80    1.80
  -5   9  -1   56.09    5.40
  -5   9  -1   40.20    5.20
  -5   9  -1   40.80    5.60
  -5   9  -1   37.10    5.10
  -5   9  -1   31.00    4.50
  -5   9  -1   43.90    5.30
  -5   9  -1   39.40    5.20
  -5   9  -1   35.10    4.90
  -5   9  -1   39.20    5.20
  -5   9  -1   42.10    5.40
  -5   9  -1   35.70    4.60
   5  -9   1   55.19    6.20
   5  -9   1   49.70    5.50
   5  -9   1   42.40    5.10
   5  -9   1   44.80    5.00
   5  -9   1   45.70    5.60
   5  -9   1   56.89    5.70
   5  -9   1   57.19    6.40
   5  -9   1   52.39    5.20
   5  -9   1   56.49    6.30
   5  -9   1   51.59    5.90
   5  -9   1   45.80    5.10
   5  -9   1   61.09    5.60
   5  -9   1   53.99    5.40
   5  -9   1   60.39    6.60
   5  -9   1   53.39    5.50
   5  -9   1   54.99    6.50
   5  -9   1   57.39    5.50
  -6   9  -1   28.60    5.00
  -6   9  -1   25.50    4.50
  -6   9  -1   29.20    4.60
  -6   9  -1   30.70    4.20
  -6   9  -1   28.50    4.90
  -6   9  -1   28.40    4.80
  -6   9  -1   29.60    5.00
  -6   9  -1   33.20    5.00
  -6   9  -1   29.20    4.70
  -6   9  -1   19.20    4.00
   6  -9   1   28.40    3.80
   6  -9   1   26.30    4.50
   6  -9   1   29.30    5.00
   6  -9   1   27.20    4.60
   6  -9   1   34.30    4.70
   6  -9   1   29.80    4.60
   6  -9   1   22.20    4.00
   6  -9   1   32.20    4.90
   6  -9   1   30.50    4.30
   6  -9   1   37.40    4.40
   6  -9   1   31.90    4.50
   6  -9   1   29.60    4.90
   6  -9   1   25.60    4.50
   6  -9   1   29.60    4.50
   6  -9   1   19.50    4.00
   6  -9   1   31.30    5.00
   6  -9   1   26.10    3.80
  -7   9  -1   21.90    4.50
  -7   9  -1   19.30    4.30
  -7   9  -1   20.00    4.20
  -7   9  -1    8.80    3.30
  -7   9  -1   19.80    4.20
  -7   9  -1   13.50    4.00
  -7   9  -1   21.30    4.30
  -7   9  -1   16.50    4.00
  -7   9  -1   14.10    3.50
  -7   9  -1   17.00    3.80
   7  -9   1   15.00    3.80
   7  -9   1   24.00    4.40
   7  -9   1   15.30    3.80
   7  -9   1   21.00    4.30
   7  -9   1   17.70    3.40
   7  -9   1   20.40    4.40
   7  -9   1   15.80    3.80
   7  -9   1   20.50    3.90
   7  -9   1   13.40    3.80
   7  -9   1   13.10    3.40
   7  -9   1   16.40    4.00
  -8   9  -1   -2.80    1.70
  -8   9  -1    0.60    2.20
  -8   9  -1    0.70    2.10
  -8   9  -1    0.00    1.60
  -8   9  -1    5.30    2.80
  -8   9  -1    1.70    2.30
  -8   9  -1   -0.40    2.30
   8  -9   1   -0.60    1.90
   8  -9   1    0.00    2.00
   8  -9   1   -0.80    2.10
   8  -9   1    0.80    2.20
   8  -9   1   -2.40    1.80
   8  -9   1    0.30    2.10
   8  -9   1   -1.10    2.00
   8  -9   1    2.60    2.40
   8  -9   1    0.90    1.70
   8  -9   1    3.60    2.50
  -9   9  -1   25.40    5.50
  -9   9  -1   21.80    4.00
  -9   9  -1   18.60    4.90
  -9   9  -1   23.90    5.40
  -9   9  -1   35.40    6.10
  -9   9  -1   26.20    5.20
  -9   9  -1   25.60    5.10
   9  -9   1   47.40    6.90
   9  -9   1   30.60    5.40
   9  -9   1   28.90    5.40
   9  -9   1   27.00    5.20
   9  -9   1   31.70    4.20
   9  -9   1   46.00    6.90
   9  -9   1   32.40    5.60
   9  -9   1   32.20    6.10
   9  -9   1   37.90    6.20
   9  -9   1   32.80    5.90
 -10   9  -1    9.30    2.90
 -10   9  -1    4.80    3.00
 -10   9  -1   17.60    5.00
 -10   9  -1    4.60    3.70
 -10   9  -1    7.50    3.70
 -10   9  -1    8.20    3.50
 -10   9  -1    9.50    4.20
  10  -9   1    8.20    3.60
  10  -9   1   18.40    4.80
  10  -9   1   10.60    4.00
  10  -9   1    6.50    3.40
  10  -9   1    9.00    4.30
  10  -9   1   15.70    4.50
  10  -9   1    9.60    2.60
  10  -9   1   10.50    4.00
  10  -9   1   15.40    4.60
  10  -9   1   19.00    4.90
 -11   9  -1    5.80    3.60
 -11   9  -1    3.40    3.70
 -11   9  -1    2.80    3.50
 -11   9  -1    2.80    3.20
 -11   9  -1    0.50    1.90
 -11   9  -1    2.60    3.00
  11  -9   1    3.00    3.30
  11  -9   1    0.90    2.60
  11  -9   1    2.10    2.90
  11  -9   1    5.10    2.10
  11  -9   1    3.40    3.00
  11  -9   1    3.00    3.30
  11  -9   1    0.50    2.80
  11  -9   1    6.50    3.50
  11  -9   1    3.60    3.50
  10   8  -1   57.49    9.20
  10   8  -1   46.30    7.70
  10   8  -1   55.79    8.40
  10   8  -1   46.30    7.40
  10   8  -1   45.10    5.40
  10   8  -1   45.50    7.90
  10   8  -1   43.50    7.80
 -10  -8   1   73.79    7.50
 -10  -8   1   52.39    8.20
 -10  -8   1   37.80    7.10
 -10  -8   1   43.70    7.60
 -10  -8   1   48.90    7.40
   9   8  -1   30.00    6.10
   9   8  -1   32.50    4.70
   9   8  -1   34.70    6.40
   9   8  -1   39.50    7.10
   9   8  -1   36.80    6.80
   9   8  -1   34.50    6.50
   9   8  -1   30.10    6.40
   9   8  -1   24.30    5.70
  -9  -8   1   22.60    4.80
  -9  -8   1   29.90    4.90
  -9  -8   1   28.50    6.20
  -9  -8   1   37.40    6.90
  -9  -8   1   25.60    5.40
  -9  -8   1   40.50    6.60
  -9  -8   1   30.10    5.30
  -9  -8   1   24.90    5.30
  -9  -8   1   31.00    6.40
   8   8  -1   15.50    4.50
   8   8  -1   24.70    5.30
   8   8  -1   17.50    4.40
   8   8  -1   20.40    5.10
   8   8  -1   17.20    4.90
   8   8  -1   17.60    3.50
   8   8  -1   17.60    4.90
   8   8  -1   29.40    6.20
   8   8  -1   27.60    6.60
   8   8  -1   27.20    5.40
  -8  -8   1   23.00    4.70
  -8  -8   1   23.20    5.00
  -8  -8   1   13.30    4.30
  -8  -8   1   27.40    5.80
  -8  -8   1   15.30    4.20
  -8  -8   1   27.30    4.90
  -8  -8   1   27.90    5.40
  -8  -8   1   28.00    4.50
  -8  -8   1   18.30    4.60
   7   8  -1   19.40    4.40
   7   8  -1   11.70    3.70
   7   8  -1   14.70    4.20
   7   8  -1   17.10    4.40
   7   8  -1   10.40    2.80
   7   8  -1   21.40    4.90
   7   8  -1   26.60    5.00
   7   8  -1   11.00    3.60
   7   8  -1   10.10    3.50
   7   8  -1   18.10    4.40
   7   8  -1   16.50    4.20
  -7  -8   1   21.90    4.10
  -7  -8   1   18.30    4.00
  -7  -8   1   10.10    3.80
  -7  -8   1   13.80    3.90
  -7  -8   1   15.60    4.30
  -7  -8   1   19.00    4.60
  -7  -8   1   19.40    4.40
  -7  -8   1   23.30    4.70
  -7  -8   1   15.30    3.80
  -7  -8   1   24.10    4.70
   6   8  -1   15.20    3.70
   6   8  -1   15.80    4.00
   6   8  -1   12.40    3.50
   6   8  -1   15.00    3.20
   6   8  -1   11.20    3.40
   6   8  -1   21.60    4.60
   6   8  -1   15.50    4.10
   6   8  -1   19.50    4.50
   6   8  -1   13.70    3.80
   6   8  -1   21.00    4.30
   6   8  -1   17.80    3.90
   6   8  -1   12.20    3.50
  -6  -8   1   23.50    4.20
  -6  -8   1   18.60    3.90
  -6  -8   1   17.10    4.00
  -6  -8   1   20.40    4.30
  -6  -8   1   23.30    4.00
  -6  -8   1   19.80    3.90
  -6  -8   1   14.30    3.80
  -6  -8   1   24.70    4.90
  -6  -8   1   21.60    4.20
  -6  -8   1   24.00    4.70
  -6  -8   1   17.00    4.20
  -6  -8   1    8.40    3.10
   5   8  -1  125.99    6.20
   5   8  -1  121.59    7.90
   5   8  -1  122.09    7.10
   5   8  -1  128.59    7.80
   5   8  -1  124.19    8.00
   5   8  -1  126.49    8.00
   5   8  -1  125.79    7.60
   5   8  -1  133.69    8.60
   5   8  -1  117.99    7.50
   5   8  -1  128.99    6.90
   5   8  -1  112.09    7.50
   5   8  -1  130.49    8.40
   5   8  -1  116.89    7.20
   5   8  -1  137.09    8.40
   5   8  -1  112.29    7.70
   5   8  -1  127.39    8.10
   5   8  -1  128.49    6.20
  -5  -8   1  115.69    8.20
  -5  -8   1  128.09    8.40
  -5  -8   1  120.89    8.00
  -5  -8   1  128.19    7.80
  -5  -8   1  123.49    8.20
  -5  -8   1  126.09    7.40
  -5  -8   1  118.09    7.60
  -5  -8   1   98.99    7.40
  -5  -8   1  118.49    7.60
  -5  -8   1  122.79    7.60
  -5  -8   1  137.99    8.00
  -5  -8   1  131.09    7.80
   4   8  -1  412.46   15.10
   4   8  -1  392.36   14.90
   4   8  -1  392.46   14.90
   4   8  -1  395.76   12.80
   4   8  -1  410.26   14.40
   4   8  -1  355.46   14.60
   4   8  -1  366.96   14.70
   4   8  -1  391.06   14.70
   4   8  -1  381.56   14.60
   4   8  -1  379.16   15.30
   4   8  -1  394.16   13.90
   4   8  -1  402.96   14.20
   4   8  -1  383.16   12.80
   4   8  -1  404.96   13.10
   4   8  -1  392.46   14.30
   4   8  -1  400.56   14.80
   4   8  -1  372.16   14.10
  -4  -8   1  409.16   15.30
  -4  -8   1  419.56   15.00
  -4  -8   1  412.86   15.70
  -4  -8   1  404.66   13.30
  -4  -8   1  415.06   13.20
  -4  -8   1  414.46   15.10
  -4  -8   1  416.46   15.00
  -4  -8   1  399.86   15.30
  -4  -8   1  402.06   15.80
  -4  -8   1  432.06   15.40
  -4  -8   1  428.76   15.50
  -4  -8   1  440.36   15.40
  -4  -8   1  387.86   15.50
  -4  -8   1  384.06   15.10
   3   8  -1  207.08    8.30
   3   8  -1  198.08    9.10
   3   8  -1  182.78    9.20
   3   8  -1  205.08    9.80
   3   8  -1  215.58    9.80
   3   8  -1  196.28    9.90
   3   8  -1  183.28    8.80
   3   8  -1  206.08    8.00
   3   8  -1  188.98    8.20
   3   8  -1  189.38    9.20
   3   8  -1  201.78    8.60
   3   8  -1  204.88    9.30
   3   8  -1  202.88    9.40
   3   8  -1  210.48    8.90
   3   8  -1  204.68    9.40
   3   8  -1  215.28    9.30
   3   8  -1  201.88    9.00
  -3  -8   1  181.78    9.30
  -3  -8   1  211.38    9.80
  -3  -8   1  201.28    9.40
  -3  -8   1  205.88   10.10
  -3  -8   1  214.58    8.50
  -3  -8   1  190.78    9.30
  -3  -8   1  204.18    9.80
  -3  -8   1  217.08   10.10
  -3  -8   1  212.08    9.90
  -3  -8   1  219.58    9.90
  -3  -8   1  210.48    8.60
  -3  -8   1  228.38    8.30
  -3  -8   1  204.98    9.20
  -3  -8   1  223.18    9.90
  -3  -8   1  225.48   10.20
   2   8  -1   37.50    4.40
   2   8  -1   27.30    4.40
   2   8  -1   26.30    3.50
   2   8  -1   19.50    3.20
   2   8  -1   32.70    4.20
   2   8  -1   26.80    3.80
   2   8  -1   24.80    3.90
   2   8  -1   21.40    3.50
   2   8  -1   26.20    3.80
   2   8  -1   24.70    3.30
   2   8  -1   31.60    4.40
   2   8  -1   25.10    3.40
   2   8  -1   23.40    3.40
   2   8  -1   28.40    3.80
   2   8  -1   25.80    3.40
  -2  -8   1   42.70    4.90
  -2  -8   1   44.40    4.60
  -2  -8   1   49.30    5.10
  -2  -8   1   48.90    5.40
  -2  -8   1   47.60    5.40
  -2  -8   1   40.40    5.00
  -2  -8   1   42.20    4.80
  -2  -8   1   39.90    4.60
  -2  -8   1   44.20    5.30
  -2  -8   1   39.50    4.70
  -2  -8   1   47.50    4.50
  -2  -8   1   46.60    4.60
  -2  -8   1   42.40    4.10
  -2  -8   1   43.70    5.00
  -2  -8   1   36.50    4.90
   1   8  -1  102.99    5.90
   1   8  -1  100.39    5.90
   1   8  -1   96.49    5.50
   1   8  -1   98.09    4.20
   1   8  -1  107.19    6.00
   1   8  -1  100.49    4.30
   1   8  -1  104.69    6.20
   1   8  -1  104.29    6.10
   1   8  -1  103.09    5.70
   1   8  -1  100.29    5.70
   1   8  -1  103.29    5.40
   1   8  -1  104.49    5.80
   1   8  -1  106.29    5.20
   1   8  -1   96.89    6.40
   1   8  -1  109.19    5.80
   1   8  -1  107.69    6.40
   1   8  -1  116.19    5.60
  -1  -8   1  108.39    6.50
  -1  -8   1  100.99    6.40
  -1  -8   1  104.39    5.90
  -1  -8   1  116.29    5.60
  -1  -8   1  107.49    6.50
  -1  -8   1  118.19    6.60
  -1  -8   1  118.09    5.80
  -1  -8   1  103.69    6.10
  -1  -8   1  120.79    6.30
  -1  -8   1  127.69    7.20
  -1  -8   1  112.89    6.00
  -1  -8   1  109.59    5.80
  -1  -8   1  111.89    6.20
  -1  -8   1  118.09    5.50
  -1  -8   1  108.89    6.10
  -1  -8   1  102.79    6.50
  -1  -8   1  103.59    5.70
  -1  -8   1  116.39    5.40
  -1  -8   1  110.09    6.00
   0   8  -1  110.09    5.10
   0   8  -1  119.69    6.30
   0   8  -1  118.69    4.80
   0   8  -1  119.49    6.10
   0   8  -1  113.49    5.20
   0   8  -1  116.79    6.30
   0   8  -1  106.49    5.80
   0   8  -1  107.39    5.70
   0   8  -1  115.79    6.20
   0   8  -1  107.29    5.90
   0   8  -1  123.39    6.90
   0   8  -1  105.79    6.40
   0   8  -1  110.99    5.90
   0   8  -1  108.49    6.10
   0   8  -1  119.89    4.90
   0   8  -1  102.19    6.00
   0  -8   1  119.99    6.80
   0  -8   1  125.59    6.90
   0  -8   1  126.09    6.20
   0  -8   1  135.29    6.10
   0  -8   1  134.79    6.70
   0  -8   1  122.89    6.20
   0  -8   1  125.69    7.00
   0  -8   1  121.99    5.90
   0  -8   1  111.39    6.50
   0  -8   1  120.09    6.00
   0  -8   1  122.39    6.50
   0  -8   1  136.89    6.10
   0  -8   1  123.29    6.30
   0  -8   1  122.69    7.10
   0  -8   1  130.59    6.90
   0  -8   1  127.49    6.60
   0  -8   1  122.99    4.90
   0  -8   1  135.69    6.70
  -1   8  -1   30.50    4.00
  -1   8  -1   32.30    3.60
  -1   8  -1   34.70    4.00
  -1   8  -1   36.80    4.40
  -1   8  -1   34.70    2.60
  -1   8  -1   32.80    3.90
  -1   8  -1   44.00    5.10
  -1   8  -1   31.60    2.50
  -1   8  -1   37.90    4.00
  -1   8  -1   36.60    4.40
  -1   8  -1   37.50    3.50
  -1   8  -1   38.00    3.60
  -1   8  -1   28.70    3.80
  -1   8  -1   39.30    4.60
  -1   8  -1   29.70    3.60
  -1   8  -1   43.80    4.80
   1  -8   1   27.50    3.50
   1  -8   1   37.20    4.40
   1  -8   1   43.40    3.20
   1  -8   1   33.50    3.90
   1  -8   1   36.50    4.50
   1  -8   1   36.10    3.90
   1  -8   1   38.00    2.90
   1  -8   1   41.60    4.90
   1  -8   1   34.00    4.20
   1  -8   1   33.10    4.50
   1  -8   1   32.10    4.00
   1  -8   1   36.40    4.20
   1  -8   1   28.20    3.80
   1  -8   1   38.20    3.80
   1  -8   1   29.40    4.10
   1  -8   1   44.10    5.10
   1  -8   1   36.90    4.20
   1  -8   1   32.60    2.40
   1  -8   1   35.30    3.20
   1  -8   1   41.60    4.70
   1  -8   1   35.90    2.80
  -2   8  -1    4.30    1.70
  -2   8  -1    6.60    2.20
  -2   8  -1    6.40    1.80
  -2   8  -1    6.90    1.90
  -2   8  -1    7.30    2.10
  -2   8  -1    5.90    2.00
  -2   8  -1    6.90    1.80
  -2   8  -1    2.80    1.60
  -2   8  -1    8.50    2.40
  -2   8  -1    4.10    1.70
  -2   8  -1    3.40    1.60
  -2   8  -1    9.60    2.50
  -2   8  -1    5.80    1.50
  -2   8  -1    6.00    2.00
   2  -8   1    6.70    2.30
   2  -8   1    7.20    2.30
   2  -8   1    5.40    1.50
   2  -8   1    6.80    2.10
   2  -8   1    7.10    1.60
   2  -8   1    4.80    2.10
   2  -8   1    5.80    2.10
   2  -8   1    6.50    2.00
   2  -8   1    5.30    1.80
   2  -8   1    7.00    1.50
   2  -8   1    4.00    1.70
   2  -8   1    2.30    1.70
   2  -8   1    6.00    2.00
   2  -8   1    3.40    1.90
   2  -8   1    3.90    1.50
   2  -8   1   10.10    2.50
   2  -8   1    2.40    1.70
   2  -8   1    7.10    1.80
   2  -8   1    3.70    2.00
   2  -8   1   11.00    2.70
  -3   8  -1  256.37   10.50
  -3   8  -1  249.78   10.40
  -3   8  -1  288.77   10.70
  -3   8  -1  267.77    9.70
  -3   8  -1  279.27   11.00
  -3   8  -1  248.88   10.20
  -3   8  -1  263.17   10.40
  -3   8  -1  257.37    9.80
  -3   8  -1  248.98    9.50
  -3   8  -1  268.87   10.40
  -3   8  -1  267.77   10.20
  -3   8  -1  250.17    9.70
   3  -8   1  257.17   10.00
   3  -8   1  233.68    9.90
   3  -8   1  250.97    9.10
   3  -8   1  239.08    9.60
   3  -8   1  259.17    9.00
   3  -8   1  238.78    9.80
   3  -8   1  238.08    9.80
   3  -8   1  228.58    9.90
   3  -8   1  257.07    9.70
   3  -8   1  248.48   10.30
   3  -8   1  233.68    9.90
   3  -8   1  241.28    7.60
   3  -8   1  238.18   10.00
   3  -8   1  252.17    8.00
   3  -8   1  238.28    8.90
   3  -8   1  234.78    9.60
   3  -8   1  241.18   10.00
   3  -8   1  256.67    9.60
   3  -8   1  226.38    9.50
  -4   8  -1    7.20    2.60
  -4   8  -1    3.20    1.90
  -4   8  -1    9.30    2.60
  -4   8  -1    3.30    1.70
  -4   8  -1    6.20    2.30
  -4   8  -1    6.20    2.20
  -4   8  -1    6.40    1.90
  -4   8  -1    7.20    2.50
  -4   8  -1    8.70    2.50
  -4   8  -1    6.50    2.10
  -4   8  -1    6.20    1.90
  -4   8  -1    2.70    1.70
   4  -8   1   13.10    2.70
   4  -8   1   12.70    2.80
   4  -8   1   16.10    3.30
   4  -8   1    8.10    2.30
   4  -8   1   12.00    2.80
   4  -8   1    7.90    2.30
   4  -8   1   15.80    2.50
   4  -8   1   16.60    2.90
   4  -8   1   12.60    2.60
   4  -8   1    8.90    2.40
   4  -8   1    9.90    2.50
   4  -8   1   14.10    2.80
   4  -8   1   13.90    2.90
   4  -8   1   11.90    2.30
   4  -8   1    9.50    2.70
   4  -8   1   10.00    2.70
   4  -8   1   12.70    2.90
   4  -8   1    9.30    2.20
   4  -8   1    9.70    2.50
   4  -8   1   13.00    2.70
  -5   8  -1  190.58    8.90
  -5   8  -1  171.58    8.80
  -5   8  -1  187.58    9.10
  -5   8  -1  176.88    9.00
  -5   8  -1  198.78    9.50
  -5   8  -1  179.18    8.90
  -5   8  -1  187.58    8.20
  -5   8  -1  187.68    9.00
  -5   8  -1  192.78    9.00
  -5   8  -1  161.58    8.10
   5  -8   1  217.18    8.50
   5  -8   1  210.08    9.90
   5  -8   1  214.38    9.30
   5  -8   1  207.68    9.80
   5  -8   1  219.28    9.40
   5  -8   1  210.48    9.80
   5  -8   1  225.68   10.20
   5  -8   1  229.08    9.60
   5  -8   1  219.08   10.20
   5  -8   1  216.78    8.70
   5  -8   1  231.28   10.20
   5  -8   1  214.38    9.20
   5  -8   1  225.18    8.90
   5  -8   1  215.78    9.20
   5  -8   1  213.48    8.70
   5  -8   1  223.28   10.20
   5  -8   1  222.98    9.40
   5  -8   1  228.48    9.10
   5  -8   1  230.08   10.00
   5  -8   1  224.78    8.70
  -6   8  -1  109.79    7.50
  -6   8  -1  129.49    7.70
  -6   8  -1  129.89    7.90
  -6   8  -1  124.59    6.80
  -6   8  -1  117.49    7.50
  -6   8  -1  130.09    7.50
  -6   8  -1  122.59    6.90
  -6   8  -1  126.69    7.50
  -6   8  -1  120.99    7.40
   6  -8   1  126.19    7.50
   6  -8   1  141.49    8.10
   6  -8   1  132.29    7.40
   6  -8   1  118.39    7.50
   6  -8   1  134.99    6.10
   6  -8   1  131.09    6.90
   6  -8   1  127.89    6.70
   6  -8   1  118.89    7.40
   6  -8   1  128.99    6.80
   6  -8   1  135.59    8.00
   6  -8   1  136.59    8.10
   6  -8   1  136.79    7.90
   6  -8   1  136.59    7.50
   6  -8   1  118.29    7.10
   6  -8   1  128.69    6.10
   6  -8   1  127.29    6.90
   6  -8   1  112.89    7.30
  -7   8  -1  156.48    9.40
  -7   8  -1  143.69    9.00
  -7   8  -1  163.38    8.20
  -7   8  -1  182.08    8.50
  -7   8  -1  157.38    9.10
  -7   8  -1  158.78    8.80
  -7   8  -1  160.88    9.10
  -7   8  -1  172.28    8.80
   7  -8   1  148.69    8.40
   7  -8   1  155.08    9.00
   7  -8   1  140.79    7.20
   7  -8   1  150.18    8.50
   7  -8   1  147.19    8.90
   7  -8   1  148.79    8.50
   7  -8   1  132.59    8.50
   7  -8   1  153.88    8.80
   7  -8   1  151.78    8.90
   7  -8   1  173.18    9.30
   7  -8   1  167.18    8.80
  -8   8  -1  231.18   10.10
  -8   8  -1  227.68   12.00
  -8   8  -1  236.98   11.60
  -8   8  -1  219.68   11.40
  -8   8  -1  225.48   10.40
  -8   8  -1  217.98   12.00
   8  -8   1  231.48   11.30
   8  -8   1  229.58   11.20
   8  -8   1  230.18    9.50
   8  -8   1  216.98   11.00
   8  -8   1  212.78   11.30
   8  -8   1  210.08   11.40
   8  -8   1  249.97   11.70
   8  -8   1  228.28   11.60
   8  -8   1  210.28   11.40
   8  -8   1  231.48   11.60
  -9   8  -1    3.80    2.90
  -9   8  -1    5.70    3.20
  -9   8  -1    9.10    2.60
  -9   8  -1    9.10    3.50
  -9   8  -1    6.30    3.10
   9  -8   1    7.10    3.30
   9  -8   1    6.00    2.10
   9  -8   1    8.90    3.70
   9  -8   1   14.60    4.00
   9  -8   1    5.50    2.80
   9  -8   1    8.70    3.80
   9  -8   1    9.10    3.60
   9  -8   1    5.80    3.30
   9  -8   1    9.90    3.30
   9  -8   1    8.50    3.00
 -10   8  -1   10.20    3.80
 -10   8  -1    7.90    3.60
 -10   8  -1    9.50    3.70
 -10   8  -1    5.60    2.30
 -10   8  -1    5.00    3.50
 -10   8  -1    4.70    3.30
 -10   8  -1    3.70    3.20
  10  -8   1    9.60    2.40
  10  -8   1   11.00    4.10
  10  -8   1    5.40    3.60
  10  -8   1    9.60    3.70
  10  -8   1   11.70    4.20
  10  -8   1    6.30    3.20
  10  -8   1    6.70    3.20
  10  -8   1   10.60    3.90
  10  -8   1    7.90    3.40
  10  -8   1    7.30    3.30
 -11   8  -1   40.70    6.70
 -11   8  -1   26.90    5.80
 -11   8  -1   36.60    7.00
 -11   8  -1   33.20    6.20
 -11   8  -1   29.20    6.10
 -11   8  -1   33.00    4.80
  11  -8   1   38.90    6.90
  11  -8   1   40.70    6.80
  11  -8   1   32.50    6.00
  11  -8   1   32.30    6.30
  11  -8   1   35.60    6.20
  11  -8   1   30.70    5.70
  11  -8   1   39.00    4.10
  11  -8   1   38.10    6.70
  11  -8   1   31.00    5.70
  11   7  -1   38.10    7.30
  11   7  -1   38.80    7.80
  11   7  -1   39.70    8.20
  11   7  -1   33.00    7.10
  11   7  -1   29.10    6.60
  11   7  -1   28.90    6.40
 -11  -7   1   24.60    6.00
 -11  -7   1   39.80    7.40
 -11  -7   1   26.10    5.90
 -11  -7   1   42.90    5.50
 -11  -7   1   42.80    7.60
  10   7  -1  100.49    6.20
  10   7  -1   78.99    9.60
  10   7  -1   90.69   10.40
  10   7  -1   86.49   11.10
  10   7  -1  103.69   11.80
  10   7  -1   82.49   10.20
  10   7  -1  104.69   11.30
  10   7  -1   76.29    9.80
 -10  -7   1  101.69    7.20
 -10  -7   1  117.09   18.50
 -10  -7   1  101.59   10.60
 -10  -7   1   98.29   10.90
 -10  -7   1  107.09   10.90
 -10  -7   1  107.09   10.80
   9   7  -1   42.00    6.70
   9   7  -1   28.80    5.60
   9   7  -1   30.10    5.80
   9   7  -1   36.50    6.10
   9   7  -1   36.00    4.60
   9   7  -1   39.70    6.80
   9   7  -1   29.70    5.90
   9   7  -1   39.00    6.90
   9   7  -1   30.10    5.80
  -9  -7   1   37.70    5.80
  -9  -7   1   37.30    6.40
  -9  -7   1   39.10    5.70
  -9  -7   1   36.50    6.50
  -9  -7   1   30.50    4.70
  -9  -7   1   31.80    5.60
  -9  -7   1   29.10    5.70
  -9  -7   1   38.10    6.20
  -9  -7   1   37.40    6.70
   8   7  -1   27.80    4.10
   8   7  -1   36.50    6.20
   8   7  -1   35.70    6.00
   8   7  -1   22.40    4.80
   8   7  -1   28.10    5.80
   8   7  -1   34.80    5.70
   8   7  -1   29.70    5.40
   8   7  -1   22.70    5.10
   8   7  -1   31.60    5.90
   8   7  -1   30.10    5.90
  -8  -7   1   45.90    6.60
  -8  -7   1   29.00    4.90
  -8  -7   1   21.30    5.00
  -8  -7   1   33.10    5.00
  -8  -7   1   36.20    6.60
  -8  -7   1   32.60    6.00
  -8  -7   1   31.40    4.50
  -8  -7   1   30.50    5.50
  -8  -7   1   25.30    5.30
   7   7  -1   73.19    7.90
   7   7  -1   89.29    9.00
   7   7  -1   76.79    8.30
   7   7  -1   73.69    8.50
   7   7  -1   75.19    8.00
   7   7  -1   81.09    6.10
   7   7  -1   75.29    8.10
   7   7  -1   74.69    5.50
   7   7  -1   79.29    7.90
   7   7  -1   85.89    8.60
   7   7  -1   91.89    6.80
  -7  -7   1   73.09    7.20
  -7  -7   1   71.89    7.70
  -7  -7   1   70.39    8.30
  -7  -7   1   79.49    7.50
  -7  -7   1   85.09    6.00
  -7  -7   1   96.69    7.30
  -7  -7   1   67.89    7.80
  -7  -7   1   84.29    6.10
  -7  -7   1   83.49    8.00
  -7  -7   1   82.09    8.40
   6   7  -1   56.19    6.70
   6   7  -1   56.39    6.80
   6   7  -1   52.89    5.50
   6   7  -1   72.19    7.70
   6   7  -1   53.39    6.20
   6   7  -1   58.39    6.60
   6   7  -1   57.79    7.10
   6   7  -1   55.69    6.60
   6   7  -1   54.69    5.40
   6   7  -1   47.70    6.10
   6   7  -1   54.39    6.70
   6   7  -1   59.29    6.60
   6   7  -1   54.89    6.80
  -6  -7   1   59.89    6.00
  -6  -7   1   62.99    7.10
  -6  -7   1   51.19    6.20
  -6  -7   1   55.89    6.90
  -6  -7   1   64.89    5.10
  -6  -7   1   59.89    7.10
  -6  -7   1   57.29    6.10
  -6  -7   1   60.09    6.40
  -6  -7   1   49.80    6.60
  -6  -7   1   66.39    6.50
  -6  -7   1   66.59    6.50
  -6  -7   1   75.49    7.60
   5   7  -1   16.30    3.30
   5   7  -1   15.50    3.60
   5   7  -1   17.30    3.60
   5   7  -1   24.70    4.40
   5   7  -1   20.60    4.10
   5   7  -1   16.40    3.20
   5   7  -1   18.70    4.00
   5   7  -1   20.70    2.90
   5   7  -1   14.60    3.50
   5   7  -1   16.60    3.60
   5   7  -1   10.70    3.00
   5   7  -1   19.30    4.20
   5   7  -1   17.80    2.70
   5   7  -1   19.40    3.70
   5   7  -1   21.00    4.10
   5   7  -1   20.70    3.30
   5   7  -1   18.20    3.70
  -5  -7   1   16.60    3.40
  -5  -7   1   26.00    4.10
  -5  -7   1   19.50    3.70
  -5  -7   1   19.40    2.90
  -5  -7   1   19.10    3.10
  -5  -7   1   20.60    4.10
  -5  -7   1   21.10    3.70
  -5  -7   1   21.30    4.10
  -5  -7   1   13.10    3.10
  -5  -7   1   15.60    3.60
  -5  -7   1   14.60    3.70
  -5  -7   1   15.80    3.30
  -5  -7   1   16.10    3.60
  -5  -7   1   12.30    2.90
   4   7  -1  133.99    7.60
   4   7  -1  133.19    7.30
   4   7  -1  148.79    7.90
   4   7  -1  144.49    7.70
   4   7  -1  129.09    7.10
   4   7  -1  135.59    6.50
   4   7  -1  135.79    7.60
   4   7  -1  130.29    7.80
   4   7  -1  134.29    6.20
   4   7  -1  123.89    7.20
   4   7  -1  144.29    7.40
   4   7  -1  125.89    7.40
   4   7  -1  141.09    6.30
   4   7  -1  137.89    7.30
   4   7  -1  142.39    7.50
   4   7  -1  125.59    6.80
   4   7  -1  128.09    6.80
  -4  -7   1  134.09    5.70
  -4  -7   1  142.39    6.40
  -4  -7   1  145.39    7.60
  -4  -7   1  143.79    7.60
  -4  -7   1  123.69    7.30
  -4  -7   1  148.19    7.90
  -4  -7   1  148.19    6.30
  -4  -7   1  132.29    7.70
  -4  -7   1  136.19    7.40
  -4  -7   1  121.19    7.60
  -4  -7   1  133.19    8.00
  -4  -7   1  133.99    7.70
  -4  -7   1  135.29    7.20
  -4  -7   1  153.18    7.70
  -4  -7   1  150.38    7.60
   3   7  -1  153.48    7.40
   3   7  -1  159.88    7.80
   3   7  -1  143.99    7.50
   3   7  -1  171.78    8.10
   3   7  -1  165.08    7.60
   3   7  -1  154.48    7.90
   3   7  -1  161.18    7.70
   3   7  -1  145.59    7.50
   3   7  -1  145.79    6.90
   3   7  -1  161.08    7.60
   3   7  -1  160.88    8.30
   3   7  -1  159.78    7.40
   3   7  -1  145.69    6.40
   3   7  -1  151.68    6.70
   3   7  -1  148.29    7.10
   3   7  -1  153.58    6.60
   3   7  -1  163.18    7.50
  -3  -7   1  141.09    7.30
  -3  -7   1  151.58    7.90
  -3  -7   1  150.18    7.40
  -3  -7   1  155.78    6.50
  -3  -7   1  153.58    7.80
  -3  -7   1  148.99    6.60
  -3  -7   1  151.68    7.70
  -3  -7   1  147.99    7.90
  -3  -7   1  139.39    7.00
  -3  -7   1  157.18    7.70
  -3  -7   1  153.08    7.60
  -3  -7   1  144.99    7.50
  -3  -7   1  142.49    7.70
  -3  -7   1  142.39    7.50
  -3  -7   1  144.39    6.00
   2   7  -1   15.40    2.60
   2   7  -1   11.90    2.30
   2   7  -1    9.80    2.80
   2   7  -1    9.90    2.40
   2   7  -1    9.30    2.10
   2   7  -1   12.90    2.70
   2   7  -1   12.50    1.70
   2   7  -1   13.30    2.50
   2   7  -1   14.30    2.50
   2   7  -1    9.60    2.10
   2   7  -1   12.80    2.60
   2   7  -1   11.20    1.70
   2   7  -1   11.50    2.60
   2   7  -1    9.60    2.20
   2   7  -1   12.00    2.70
   2   7  -1   11.80    1.50
   2   7  -1   14.90    2.90
   2   7  -1   12.40    2.70
  -2  -7   1    5.40    2.00
  -2  -7   1    5.70    1.70
  -2  -7   1    8.50    2.00
  -2  -7   1    8.20    2.00
  -2  -7   1    5.80    2.00
  -2  -7   1    4.40    1.90
  -2  -7   1    5.30    2.00
  -2  -7   1    5.90    2.20
  -2  -7   1    6.60    2.20
  -2  -7   1    3.40    1.70
  -2  -7   1    4.80    1.90
  -2  -7   1    6.00    2.10
  -2  -7   1    8.40    2.30
  -2  -7   1    8.40    1.80
  -2  -7   1    6.10    1.70
  -2  -7   1    8.60    2.30
   1   7  -1   83.39    3.50
   1   7  -1   75.59    4.60
   1   7  -1   72.99    4.10
   1   7  -1   76.29    4.90
   1   7  -1   69.19    4.50
   1   7  -1   77.09    4.60
   1   7  -1   81.19    4.90
   1   7  -1   85.69    4.90
   1   7  -1   82.29    4.70
   1   7  -1   78.99    3.50
   1   7  -1   82.09    4.90
   1   7  -1   79.49    5.10
   1   7  -1   87.29    4.80
   1   7  -1   76.89    4.50
   1   7  -1   76.19    4.30
   1   7  -1   84.79    4.50
   1   7  -1   82.09    5.40
   1   7  -1   84.59    5.00
  -1  -7   1   98.69    3.50
  -1  -7   1  108.39    5.70
  -1  -7   1   97.09    5.40
  -1  -7   1   99.59    5.80
  -1  -7   1  102.39    5.10
  -1  -7   1   99.19    5.80
  -1  -7   1   96.69    5.30
  -1  -7   1   98.09    5.20
  -1  -7   1   98.79    5.50
  -1  -7   1   97.39    4.90
  -1  -7   1   89.89    5.70
  -1  -7   1   94.59    5.30
  -1  -7   1  100.89    5.80
  -1  -7   1   90.19    5.20
  -1  -7   1   96.79    5.60
  -1  -7   1   89.79    5.40
   0   7  -1  235.38    7.50
   0   7  -1  239.38    9.10
   0   7  -1  250.67    9.00
   0   7  -1  229.48    8.90
   0   7  -1  228.08    9.50
   0   7  -1  243.38    8.80
   0   7  -1  235.08    7.40
   0   7  -1  243.08    8.00
   0   7  -1  233.38    8.70
   0   7  -1  235.88    9.00
   0   7  -1  243.78    8.90
   0   7  -1  223.98    8.80
   0   7  -1  222.98    8.70
   0   7  -1  228.98    9.30
   0   7  -1  233.18    8.90
   0   7  -1  229.48    9.30
   0   7  -1  234.58    7.80
   0  -7   1  236.08    8.80
   0  -7   1  238.38    9.80
   0  -7   1  254.97    9.80
   0  -7   1  248.38    8.80
   0  -7   1  248.68    9.60
   0  -7   1  237.68    7.50
   0  -7   1  244.08    8.50
   0  -7   1  249.88    9.20
   0  -7   1  255.77    9.90
   0  -7   1  245.88    9.00
   0  -7   1  254.47    8.90
   0  -7   1  249.08    8.70
   0  -7   1  240.98    9.20
   0  -7   1  243.48    9.60
   0  -7   1  233.98    9.30
   0  -7   1  249.88    8.70
   0  -7   1  262.77    9.50
   0  -7   1  251.37    9.30
   0  -7   1  244.28    6.80
  -1   7  -1  500.05   16.00
  -1   7  -1  490.75   15.50
  -1   7  -1  506.05   13.70
  -1   7  -1  527.25   16.00
  -1   7  -1  521.65   15.60
  -1   7  -1  516.45   13.50
  -1   7  -1  511.75   15.20
  -1   7  -1  505.75   14.10
  -1   7  -1  515.15   14.90
  -1   7  -1  524.75   15.50
  -1   7  -1  510.55   15.60
  -1   7  -1  521.35   15.80
  -1   7  -1  514.35   14.30
  -1   7  -1  529.15   15.40
  -1   7  -1  511.75   15.80
   1  -7   1  486.55   15.00
   1  -7   1  508.45   15.40
   1  -7   1  513.45   15.30
   1  -7   1  486.65   13.90
   1  -7   1  517.85   15.00
   1  -7   1  498.45   13.50
   1  -7   1  494.45   15.50
   1  -7   1  528.65   15.60
   1  -7   1  480.65   13.90
   1  -7   1  501.95   15.70
   1  -7   1  491.15   14.70
   1  -7   1  501.55   14.20
   1  -7   1  508.45   15.80
   1  -7   1  510.35   15.30
   1  -7   1  514.05   16.10
   1  -7   1  486.05   15.60
   1  -7   1  496.75   15.30
   1  -7   1  498.75   15.20
   1  -7   1  506.75   13.30
   1  -7   1  491.55   15.10
  -2   7  -1  580.24   16.10
  -2   7  -1  579.04   16.90
  -2   7  -1  575.14   16.90
  -2   7  -1  575.14   17.10
  -2   7  -1  595.74   17.00
  -2   7  -1  564.44   15.00
  -2   7  -1  567.44   17.10
  -2   7  -1  576.54   14.30
  -2   7  -1  561.24   16.10
  -2   7  -1  567.84   17.30
  -2   7  -1  571.04   16.90
  -2   7  -1  602.14   16.40
  -2   7  -1  562.54   16.90
  -2   7  -1  562.84   17.30
  -2   7  -1  581.34   16.90
   2  -7   1  575.44   17.20
   2  -7   1  587.54   16.50
   2  -7   1  567.54   17.50
   2  -7   1  593.34   17.30
   2  -7   1  578.04   17.20
   2  -7   1  594.84   15.40
   2  -7   1  584.84   16.70
   2  -7   1  624.94   17.80
   2  -7   1  573.84   17.50
   2  -7   1  561.34   17.60
   2  -7   1  582.94   15.50
   2  -7   1  557.54   17.20
   2  -7   1  594.34   15.90
   2  -7   1  582.94   16.00
   2  -7   1  606.34   17.40
   2  -7   1  592.64   17.60
   2  -7   1  601.14   17.30
   2  -7   1  592.24   17.20
   2  -7   1  584.34   17.50
   2  -7   1  585.94   17.00
  -3   7  -1   60.19    4.00
  -3   7  -1   56.59    3.70
  -3   7  -1   61.59    4.40
  -3   7  -1   58.49    4.10
  -3   7  -1   60.19    4.30
  -3   7  -1   58.09    4.20
  -3   7  -1   52.99    3.90
  -3   7  -1   51.89    3.60
  -3   7  -1   66.19    4.50
  -3   7  -1   65.69    4.50
  -3   7  -1   54.89    4.30
  -3   7  -1   58.19    4.20
   3  -7   1   63.99    4.50
   3  -7   1   62.39    4.10
   3  -7   1   65.19    4.60
   3  -7   1   62.09    3.00
   3  -7   1   68.89    4.70
   3  -7   1   68.79    3.90
   3  -7   1   65.19    4.00
   3  -7   1   62.79    4.50
   3  -7   1   58.99    4.30
   3  -7   1   70.29    4.50
   3  -7   1   58.09    4.10
   3  -7   1   63.59    3.00
   3  -7   1   70.49    4.70
   3  -7   1   68.09    4.30
   3  -7   1   63.99    4.40
   3  -7   1   68.09    4.30
   3  -7   1   63.39    4.20
   3  -7   1   66.99    4.00
   3  -7   1   66.99    4.40
  -4   7  -1   34.50    3.60
  -4   7  -1   42.80    3.70
  -4   7  -1   43.60    4.90
  -4   7  -1   40.70    4.40
  -4   7  -1   39.80    4.50
  -4   7  -1   30.70    4.00
  -4   7  -1   43.90    4.80
  -4   7  -1   27.40    3.70
  -4   7  -1   32.50    4.10
  -4   7  -1   32.20    3.90
  -4   7  -1   34.50    4.20
   4  -7   1   29.40    3.60
   4  -7   1   36.50    4.40
   4  -7   1   32.80    2.60
   4  -7   1   28.20    4.00
   4  -7   1   40.30    4.00
   4  -7   1   41.40    3.80
   4  -7   1   37.20    4.00
   4  -7   1   35.20    4.00
   4  -7   1   40.60    4.00
   4  -7   1   35.80    3.90
   4  -7   1   33.30    4.30
   4  -7   1   31.90    3.40
   4  -7   1   36.60    4.00
   4  -7   1   30.30    4.10
   4  -7   1   26.60    3.80
   4  -7   1   30.60    3.60
   4  -7   1   31.30    3.90
   4  -7   1   33.70    4.20
   4  -7   1   32.80    3.90
   4  -7   1   41.40    4.40
   4  -7   1   25.60    3.50
  -5   7  -1   60.19    5.90
  -5   7  -1   65.99    5.00
  -5   7  -1   69.69    6.70
  -5   7  -1   62.29    5.90
  -5   7  -1   63.49    4.40
  -5   7  -1   63.79    4.80
  -5   7  -1   62.69    4.50
  -5   7  -1   68.19    5.20
   5  -7   1   70.89    4.90
   5  -7   1   71.09    4.90
   5  -7   1   62.69    4.10
   5  -7   1   71.09    4.20
   5  -7   1   71.99    4.70
   5  -7   1   65.69    5.10
   5  -7   1   66.09    4.20
   5  -7   1   61.89    4.80
   5  -7   1   62.69    4.10
   5  -7   1   72.09    5.30
   5  -7   1   71.89    5.20
   5  -7   1   71.39    4.60
   5  -7   1   71.29    4.30
   5  -7   1   59.39    6.00
   5  -7   1   71.29    5.10
   5  -7   1   64.89    4.70
   5  -7   1   60.99    5.10
   5  -7   1   71.99    5.20
   5  -7   1   67.59    4.40
   5  -7   1   67.79    5.10
   5  -7   1   70.39    4.60
  -6   7  -1  269.07   10.40
  -6   7  -1  263.37   11.40
  -6   7  -1  274.97   11.00
  -6   7  -1  286.77   12.30
  -6   7  -1  285.57   10.60
  -6   7  -1  279.87   11.20
  -6   7  -1  253.67   11.60
  -6   7  -1  272.47   11.40
   6  -7   1  270.87   11.50
   6  -7   1  286.27   10.40
   6  -7   1  255.17   11.50
   6  -7   1  286.87    9.50
   6  -7   1  269.77   11.60
   6  -7   1  291.07   10.40
   6  -7   1  270.77   11.20
   6  -7   1  273.47   11.30
   6  -7   1  291.37    9.60
   6  -7   1  287.77   11.80
   6  -7   1  274.67   11.30
   6  -7   1  281.07   11.90
   6  -7   1  277.57   11.70
   6  -7   1  287.47   11.60
   6  -7   1  274.67   10.50
   6  -7   1  280.27   11.30
   6  -7   1  292.67   10.60
  -7   7  -1  199.58    9.00
  -7   7  -1  205.28    8.80
  -7   7  -1  209.08   10.30
  -7   7  -1  194.78   10.30
  -7   7  -1  206.58    9.50
  -7   7  -1  193.58    9.40
  -7   7  -1  199.58    9.90
  -7   7  -1  191.88   10.30
   7  -7   1  207.98   10.00
   7  -7   1  219.68   10.70
   7  -7   1  195.38   10.20
   7  -7   1  215.18   10.40
   7  -7   1  204.98   10.30
   7  -7   1  229.78   10.40
   7  -7   1  207.18   10.20
   7  -7   1  222.08   10.60
   7  -7   1  216.08    8.70
   7  -7   1  233.58   10.50
  -8   7  -1    5.40    2.70
  -8   7  -1    9.90    3.20
  -8   7  -1   11.70    3.40
  -8   7  -1    3.70    2.50
  -8   7  -1   12.70    2.80
  -8   7  -1   12.00    3.10
   8  -7   1    9.00    3.20
   8  -7   1    9.60    3.30
   8  -7   1    7.90    2.80
   8  -7   1    4.80    2.80
   8  -7   1    6.60    2.90
   8  -7   1    6.80    1.90
   8  -7   1    9.80    3.20
   8  -7   1    4.30    2.50
   8  -7   1    5.90    2.60
   8  -7   1    5.00    2.60
  -9   7  -1   42.20    6.10
  -9   7  -1   43.60    5.60
  -9   7  -1   49.20    6.80
  -9   7  -1   40.90    6.30
  -9   7  -1   40.30    6.50
  -9   7  -1   45.90    5.10
   9  -7   1   40.50    6.40
   9  -7   1   41.00    6.00
   9  -7   1   31.20    5.50
   9  -7   1   24.30    4.90
   9  -7   1   39.60    4.30
   9  -7   1   29.80    5.30
   9  -7   1   32.70    5.60
   9  -7   1   44.40    6.50
   9  -7   1   41.20    6.40
   9  -7   1   32.40    5.30
 -10   7  -1    6.60    3.20
 -10   7  -1    3.50    2.90
 -10   7  -1    6.10    3.30
 -10   7  -1    7.00    2.40
 -10   7  -1    4.30    3.00
  10  -7   1    1.30    2.60
  10  -7   1    0.60    2.60
  10  -7   1    1.40    2.30
  10  -7   1    5.40    3.10
  10  -7   1    4.10    2.80
  10  -7   1    0.70    2.40
  10  -7   1    0.50    2.30
  10  -7   1    0.20    1.20
  10  -7   1    3.30    2.70
  10  -7   1    0.20    2.30
 -11   7  -1    5.30    3.90
 -11   7  -1   14.70    4.60
 -11   7  -1    9.60    4.00
 -11   7  -1    9.50    2.60
 -11   7  -1   11.40    4.40
  11  -7   1   14.10    4.50
  11  -7   1    7.60    3.10
  11  -7   1    9.50    4.00
  11  -7   1    6.40    3.40
  11  -7   1    5.90    3.00
  11  -7   1   14.10    4.50
  11  -7   1   17.00    4.60
  11  -7   1    6.50    3.50
 -12   7  -1   23.10    5.70
 -12   7  -1   27.00    4.10
 -12   7  -1   29.00    6.30
 -12   7  -1   29.60    6.30
 -12   7  -1   16.70    5.40
 -12   7  -1   15.50    4.80
  12  -7   1   30.10    6.20
  12  -7   1   19.90    5.00
  12  -7   1   24.80    6.20
  12  -7   1   25.00    5.40
  12  -7   1   20.50    5.40
  12  -7   1   27.30    5.90
  12  -7   1   30.60    6.30
  11   6  -1    0.20    2.90
  11   6  -1    1.70    2.70
  11   6  -1    5.70    3.60
  11   6  -1    4.00    3.80
  11   6  -1   -0.30    3.20
  11   6  -1    7.50    4.20
 -11  -6   1    6.10    3.90
 -11  -6   1    2.90    3.00
 -11  -6   1    2.10    3.00
 -11  -6   1    0.40    3.10
 -11  -6   1   -1.20    1.70
  10   6  -1    3.90    3.40
  10   6  -1    1.90    3.20
  10   6  -1    2.30    3.00
  10   6  -1    4.40    3.40
  10   6  -1    3.70    3.00
  10   6  -1    3.40    3.20
  10   6  -1    2.60    3.20
  10   6  -1    4.30    3.20
  10   6  -1    1.30    1.70
 -10  -6   1    2.40    3.30
 -10  -6   1    3.90    2.90
 -10  -6   1    0.20    2.60
 -10  -6   1   -0.40    2.60
 -10  -6   1    1.10    2.80
 -10  -6   1   -1.30    2.50
 -10  -6   1    2.70    2.00
   9   6  -1   14.00    4.40
   9   6  -1    4.80    3.30
   9   6  -1    4.90    3.30
   9   6  -1    8.20    3.60
   9   6  -1    6.80    3.40
   9   6  -1    4.50    3.10
   9   6  -1    7.20    2.40
   9   6  -1    6.20    3.20
   9   6  -1    1.20    2.40
   9   6  -1    5.50    3.60
  -9  -6   1    4.50    3.00
  -9  -6   1    2.70    2.70
  -9  -6   1    1.20    1.50
  -9  -6   1    8.60    3.80
  -9  -6   1    2.10    2.40
  -9  -6   1    3.30    2.50
  -9  -6   1    3.70    3.00
   8   6  -1    1.30    2.70
   8   6  -1    1.30    2.30
   8   6  -1    4.10    2.50
   8   6  -1    9.80    3.30
   8   6  -1    8.70    3.50
   8   6  -1    6.90    3.10
   8   6  -1    4.20    2.80
   8   6  -1    3.70    2.70
   8   6  -1    2.50    2.90
   8   6  -1    2.50    2.40
   8   6  -1    5.20    2.10
  -8  -6   1    0.70    1.90
  -8  -6   1    4.00    2.10
  -8  -6   1    5.90    3.20
  -8  -6   1   -0.20    2.20
  -8  -6   1    3.10    2.30
  -8  -6   1    8.30    2.90
  -8  -6   1   -0.80    2.00
  -8  -6   1    0.40    2.30
  -8  -6   1    4.70    2.80
   7   6  -1   70.39    7.80
   7   6  -1   78.09    7.70
   7   6  -1   78.59    7.80
   7   6  -1   79.99    6.50
   7   6  -1   70.69    6.70
   7   6  -1   77.19    8.20
   7   6  -1   65.89    7.40
   7   6  -1   71.79    7.70
   7   6  -1   82.09    8.20
   7   6  -1   69.09    4.90
   7   6  -1   76.49    8.00
  -7  -6   1   89.49    6.50
  -7  -6   1   92.59    5.90
  -7  -6   1   89.59    7.00
  -7  -6   1   83.09    5.60
  -7  -6   1   81.89    8.40
  -7  -6   1   91.09    7.20
  -7  -6   1   76.29    8.10
  -7  -6   1   79.29    6.00
  -7  -6   1   89.19    6.70
  -7  -6   1   94.59    6.90
   6   6  -1    9.20    2.90
   6   6  -1    9.70    3.00
   6   6  -1   10.90    3.00
   6   6  -1   13.10    2.80
   6   6  -1    9.90    3.20
   6   6  -1    5.30    2.70
   6   6  -1    8.70    2.20
   6   6  -1    9.20    2.90
   6   6  -1   15.10    3.50
   6   6  -1   11.20    3.00
   6   6  -1   13.00    3.40
   6   6  -1    4.80    2.40
  -6  -6   1   13.40    3.20
  -6  -6   1   17.80    3.40
  -6  -6   1   15.10    3.10
  -6  -6   1   15.00    3.20
  -6  -6   1   27.00    5.00
  -6  -6   1   15.40    3.20
  -6  -6   1   17.30    3.60
  -6  -6   1   20.70    3.50
  -6  -6   1   15.30    3.50
  -6  -6   1   13.30    3.40
  -6  -6   1   20.40    3.40
  -6  -6   1   17.30    3.90
   5   6  -1  100.59    5.80
   5   6  -1  113.19    6.90
   5   6  -1  106.49    5.80
   5   6  -1  102.39    6.50
   5   6  -1  105.59    6.60
   5   6  -1  108.79    6.90
   5   6  -1  108.89    6.60
   5   6  -1   99.69    6.20
   5   6  -1   98.19    6.60
   5   6  -1  106.69    6.70
   5   6  -1  113.69    7.00
   5   6  -1  102.69    4.80
   5   6  -1  104.49    4.80
   5   6  -1  108.99    6.70
   5   6  -1   90.39    6.20
   5   6  -1   96.79    6.60
   5   6  -1   99.39    6.20
[truncated: 7,031,093 more chars]
